# Supplementary material for: Brønsted-acid-catalyzed one-pot tandem annulation/[5 + 2]-cycloaddition of o-propargyl alcohol benzaldehydes with alkynes: regioselective and stereoselective synthesis of dibenzo[a,f]azulen-12-ones
Source: Royal Society of Chemistry journal article supplement (doi:10.1039/d0qo00522c), 2020-01-01
Supplement: d0qo00522c1.pdf [file d0qo00522c1.pdf]

## Supporting Information

Brønsted Acid-Catalyzed One-Pot Tandem Annulation/  
[5+2]-Cycloaddition of *o*-Propargyl Alcohol Benzaldehydes with  
Alkynes: Regioselective and Stereoselective Synthesis of  
Dibenzo[*a,f*]azulen-12-ones

Ni-Ni Zhou,\* Si-Si Ning, Lin-Qiang Li, Jie-Yun Zhang, Ming-Jin Fan,  
De-Suo Yang, and Hai-Tao Zhu\*

Shannxi Key Laboratory of Phytochemistry, College of Chemistry and  
Chemical Engineering, Baoji University of Arts and Sciences, Baoji  
721013, China.

E-mail: zhuht@bjwlxy.edu.cn

zhouni13\_2008@163.com

### Table of Contents

|          |                                                                       |                  |
|----------|-----------------------------------------------------------------------|------------------|
| <b>1</b> | <b>General Remarks</b>                                                | <b>S2</b>        |
| <b>2</b> | <b>General Procedure for the Synthesis of Substrates and Products</b> | <b>S2-S6</b>     |
| <b>3</b> | <b>Reference</b>                                                      | <b>S7</b>        |
| <b>4</b> | <b>Characterization Data of 3a-3ap, 4a-4l, 5a, 6a, 7a, 8a and 9a</b>  | <b>S8-S30</b>    |
| <b>5</b> | <b>Crystallographic data of 3a, 5a, 8a and 9a</b>                     | <b>S31- S34</b>  |
| <b>6</b> | <b><sup>1</sup>H NMR and <sup>13</sup>C NMR Spectra for Products</b>  | <b>S35-S168</b>  |
| <b>7</b> | <b>High resolution mass spectrometry analysis</b>                     | <b>S169-S171</b> |

## General Remarks

Column chromatography was carried out on silica gel (200-300 meshes). Conversion was monitored by thin layer chromatography (TLC).  $^1\text{H}$  NMR spectra were recorded on 400 MHz in chloroform-d and  $^{13}\text{C}$  NMR spectra were recorded on 100 MHz in chloroform-d. IR spectra were recorded on a FT-IR spectrometer and only major peaks are reported in  $\text{cm}^{-1}$ . All products were further characterized by high resolution mass spectra (HRMS); copies of their  $^1\text{H}$  NMR and  $^{13}\text{C}$  NMR spectra are provided in the Supporting Information. Dry THF were distilled over  $\text{CaH}_2$ , and other commercial solvents were used without further treatment.

## Synthetic Procedures and Spectral Data

All starting materials were prepared according to previously reported procedures.<sup>S1</sup>

### General Procedure of dibenzo[a,f]azulen-12-ones **3** or **4**

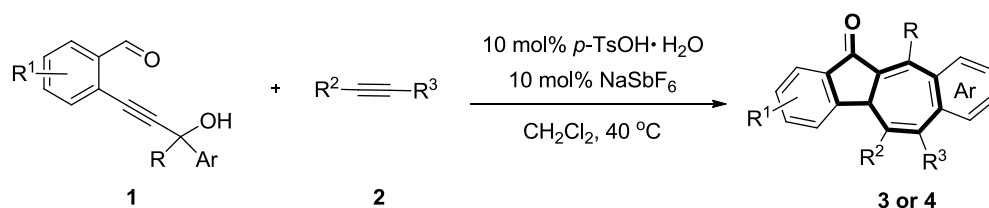

To a solution of *o*-propargyl alcohol benzaldehydes **1** (0.20 mmol) and alkynes **2** (1.0 equiv) in  $\text{CH}_2\text{Cl}_2$  (3.0 mL) was added  $p\text{-TsOH}\cdot\text{H}_2\text{O}$  (10 mol%) and  $\text{NaSbF}_6$  (10 mol%) at  $40\text{ }^\circ\text{C}$  for 12 h. When the reaction was completed, the reaction mixture was quenched by addition of saturated aqueous sodium hydrogen carbonate (5 mL) and extracted with ethyl acetate (3 x 15 mL), washed with water, saturated brine, dried over  $\text{Na}_2\text{SO}_4$  and evaporated under reduced pressure. The residue was purified by chromatography on silica gel to afford corresponding dibenzo[a,f]azulen-12-ones **3** or **4**.

### General procedure for the diastereoselective epoxidation of **3a**:<sup>S2</sup>

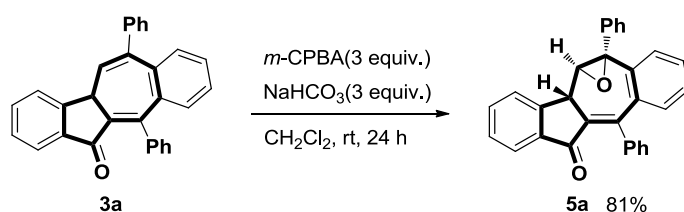

To a solution of azulenones **3a** (0.20 mmol) in  $\text{CH}_2\text{Cl}_2$  (3.0 mL) was added

*m*-CPBA (3.0 equiv) and NaHCO<sub>3</sub> (3.0 equiv.) at room temperature for 24 h. When the reaction was completed, the reaction mixture was quenched by addition of saturated aqueous sodium hyposulfite (5 mL) and extracted with ethyl acetate (3 x 15 mL), washed with water, saturated brine, dried over Na<sub>2</sub>SO<sub>4</sub> and evaporated under reduced pressure. The residue was purified by chromatography on silica gel to afford hydroazulenone[b]oxirane **5a** in 81% yield.

### General procedure for the allylic methoxylation reaction of **3a**:

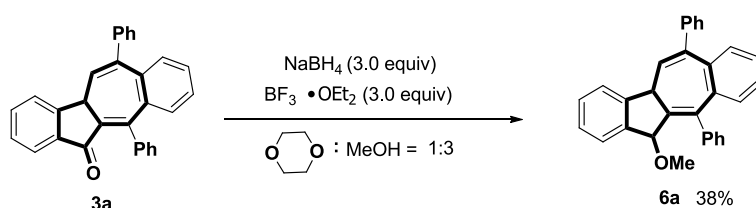

To a stirred solution of **3a** (0.2 mmol) in MeOH : dioxane (3 : 1, 3.0 mL), was added NaBH<sub>4</sub> (3.0 equiv, 0.6 mmol) and BF<sub>3</sub>·OEt<sub>2</sub> (3.0 equiv, 0.6 mmol) at room temperature for 2 h. When the reaction was considered to be complete, the reaction mixture was quenched by water and extracted with ethyl acetate (3 x 15 mL), washed with water, saturated brine, dried over Na<sub>2</sub>SO<sub>4</sub> and evaporated under reduced pressure. The residue was purified by chromatography on silica gel to afford 12-methoxydibenzo[a,f]azulene **6a** in 38% yield.

### General procedure for the allylic benzyloxylation and thioetherification reactions of **3a**:<sup>S3</sup>

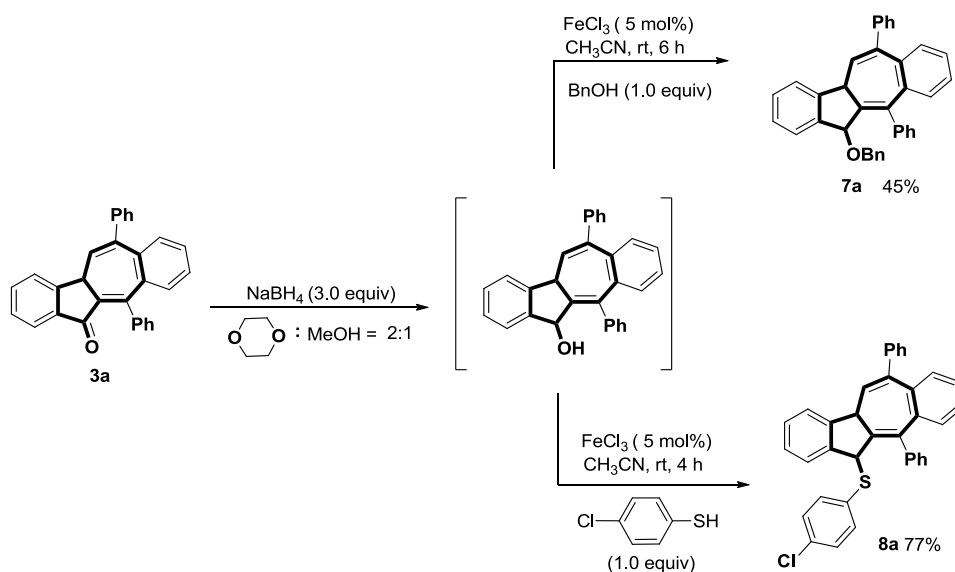

To a stirred solution of **3a** (0.2 mmol) in MeOH : dioxane (1 : 2, 3.0 mL), was added NaBH<sub>4</sub> (3.0 equiv, 0.6 mmol) at room temperature for 5 h. When the reaction was considered to be complete, the reaction mixture was quenched by water and extracted with ethyl acetate (3 x 15 mL), washed with water, saturated brine, dried over Na<sub>2</sub>SO<sub>4</sub> and evaporated under reduced pressure. The residue was purified by chromatography on silica gel to afford 12-hydroxyl dibenzo[a,f]azulene intermediate.

To a solution of 12-hydroxyl dibenzo[a,f]azulene intermediate (0.20 mmol) and BnOH (0.2 mmol, 1.0 equiv) or *p*-chlorothiophenol (0.2 mmol, 1.0 equiv) in CH<sub>3</sub>CN (2.0 mL) was added FeCl<sub>3</sub> (5 mol%) at room temperature for 6h or 4h. When the reaction was completed, the reaction mixture was quenched by addition of saturated aqueous ammonium chloride (5 mL) and extracted with ethyl acetate (3 x 15 mL), washed with water, saturated brine, dried over Na<sub>2</sub>SO<sub>4</sub> and evaporated under reduced pressure. The residue was purified by chromatography on silica gel to afford 12-benzyloxy dibenzo[a,f]azulene **7a** and 12-(*p*-chlorothiophenyl) dibenzo[a,f]azulene **8a** in 45% and 77% yield, respectively.

### General procedure for the [5+2]-cycloaddition reactions and the allylic benzyloxylation of Int-3:<sup>S4</sup>

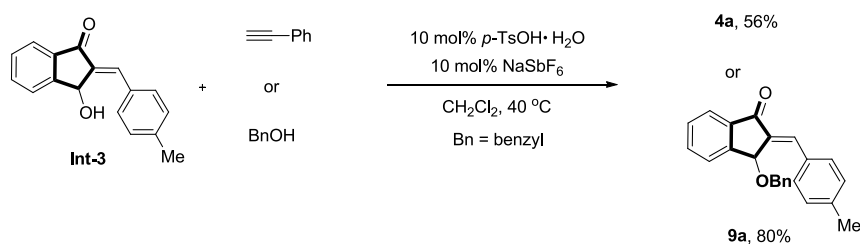

To a solution of ethynylbenzene **2a** (1.0 equiv) or BnOH (1.0 equiv) and 3-hydroxy indanones **Int-3** (0.20 mmol) in CH<sub>2</sub>Cl<sub>2</sub> (3.0 mL) was added *p*-TsOH·H<sub>2</sub>O (10 mol%) and NaSbF<sub>6</sub> (10 mol%) at 40 °C for 12 h. When the reaction was completed, the reaction mixture was quenched by addition of saturated aqueous sodium hydrogen carbonate (5 mL) and extracted with ethyl acetate (3 x 15 mL), washed with water, saturated brine, dried over Na<sub>2</sub>SO<sub>4</sub> and evaporated under reduced pressure. The residue was purified by chromatography on silica gel to afford the corresponding **4a** and **9a** in 56% and 80% yield, respectively.

**General Procedure of 2-(3-hydroxy-3,3-diphenylprop-1-yn-1-yl)benzaldehyde 1a**  
**(1a-<sup>16</sup>O : 1a-<sup>18</sup>O ≈ 6 : 1):** <sup>S5</sup>

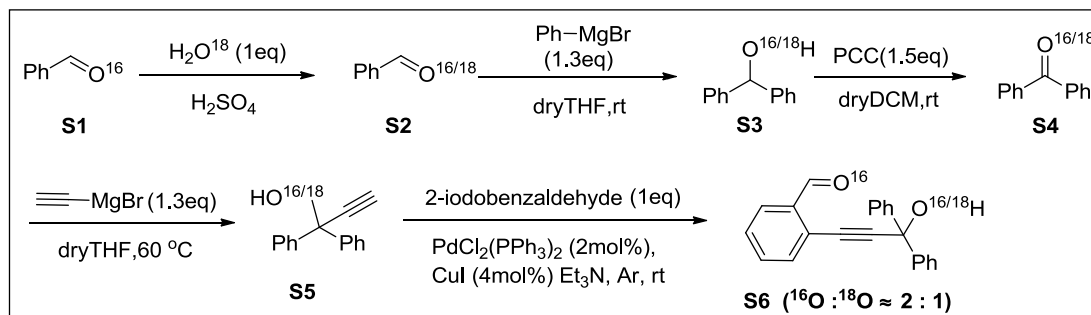

To a solution of benzaldehyde **S1** (150 mmol) was added H<sub>2</sub>O<sup>18</sup> (1.0 equiv) and H<sub>2</sub>SO<sub>4</sub> (30mg) at rt for 12 h. When the reaction was completed, the reaction mixture was quenched by addition of saturated aqueous sodium hydrogen carbonate (5 mL), washed with water, saturated brine, dried over Na<sub>2</sub>SO<sub>4</sub>. The residue was purified by distillation under reduced pressure to obtain the corresponding **S2**.

To a solution of benzaldehyde **S2** (50 mmol) in THF (10 mL) was added phenylmagnesium bromide (65 mmol) and the reaction vial was flushed with Ar and the reaction mixture was stirred for 5h. Upon completion, the mixture was quenched with saturated NH<sub>4</sub>Cl solution (40 mL), extracted with EtOAc (50 mL×3), washed with water, saturated brine, dried over Na<sub>2</sub>SO<sub>4</sub>, filtered, and concentrated to get the crude product **S3**.

To a solution of crude product **S3** (40 mmol) in dry CH<sub>2</sub>Cl<sub>2</sub> (20 mL) was added PCC (60 mmol) in one portion at rt and then the mixture was stirred at rt for 5 h. Upon completion, the mixture was filtered through a celite plug, concentrated to give the crude product and the residue was purified by chromatography (PE:EA = 20:1) to get the desired substrate benzophenone **S4**.

To a solution of benzophenone **S4** (15 mmol) in THF (20 mL) was added ethynylmagnesium bromide (19 mmol) and the reaction vial was flushed with Ar and the reaction mixture was stirred for 8h at 60°C. Upon completion, the mixture was quenched with saturated NH<sub>4</sub>Cl solution (40 mL), extracted with EtOAc (50 mL×3), washed with water, saturated brine, dried over Na<sub>2</sub>SO<sub>4</sub>, filtered, and concentrated to get the desired substrate 1,1-diphenylprop-2-yn-1-ol **S5**.

To a solution of 2-iodobenzaldehyde (5 mmol) in Et<sub>3</sub>N (10 mL) was added PdCl<sub>2</sub>(PPh<sub>3</sub>)<sub>2</sub> (4 mol %) and CuI (2 mol %) and the reaction vial was flushed with Ar and the reaction mixture was stirred for 5 minutes. A solution of 1,1-diphenylprop-2-yn-1-ol **S5** in Et<sub>3</sub>N (5 mL) were then added dropwise through a syringe for 5 minutes. The resulting solution was stirred at room temperature overnight. When the reaction was considered complete as determined by TLC analysis, the mixture was quenched by addition of saturated aqueous ammonium chloride (10 mL) and extracted with EtOAc (3 x 30 mL). The combined organic layers were washed with water, brine, dried over Na<sub>2</sub>SO<sub>4</sub>, and concentrated under reduced pressure. The crude material was purified by flash column chromatography (PE:EA = 5:1) to give **S6** (substrate **S6** proved to be the inseparable mixture (**S6**-<sup>16</sup>O and **S6**-<sup>18</sup>O) in an approximate 2 : 1 ratio by high resolution mass spectrometry analysis).

**General Procedure of dibenzo[a,f]azulen-12-one **3a** (**3a**-<sup>16</sup>O : **3a**-<sup>18</sup>O ≈ 6 : 1)**

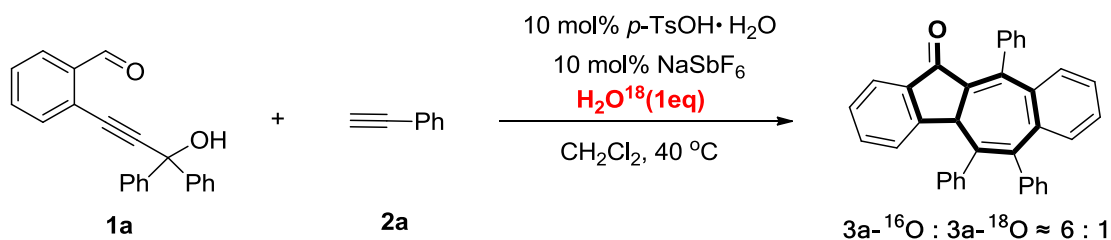

To a solution of 2-(3-hydroxy-3,3-diphenylprop-1-yn-1-yl)benzaldehyde **1a** (0.20 mmol) and phenylacetylene **2a** (1.0 equiv) in CH<sub>2</sub>Cl<sub>2</sub> (3.0 mL) was added *p*-TsOH·H<sub>2</sub>O (10 mol%) , NaSbF<sub>6</sub> (10 mol%) and H<sub>2</sub>O<sup>18</sup> (1.0 equiv) at 40 °C for 12 h. When the reaction was completed, the reaction mixture was quenched by addition of saturated aqueous sodium hydrogen carbonate (5 mL) and extracted with ethyl acetate (3 x 15 mL), washed with water, saturated brine, dried over Na<sub>2</sub>SO<sub>4</sub> and evaporated under reduced pressure. The residue was purified by chromatography on silica gel to afford corresponding dibenzo[a,f]azulen-12-one **3a** in 34% yield.

## Reference:

- S1 (a) H.-T. Zhu, X. Dong, L.-J. Wang, M.-J. Zhong, X.-Y. Liu, Y.-M. Liang, *Chem. Commun.* 2012, 48, 10748; (b) H.-T. Zhu, M.-J. Fan, D.-S. Yang, X.-L. Wang, S. Ke, C.-Y. Zhang, Z.-H. Guan, *Org. Chem. Front.* 2015, **2**, 506.
- S2 K.-G. Ji, Y.-W. Shen, X.-Z. Shu, H.-Q. Xiao, Y.-J. Bian, Y.-M. Liang, *Adv. Synth. Catal.* 2008, **350**, 1275.
- S3 X. Zhang, W. Rao, Sally, P. W. H. Chan, *Org. Biomol. Chem.* 2009, **7**, 4186.
- S4 N.-N. Zhou, S.-S. Ning, X.-J. Tong, T.-T. Luo, J. Yang, L.-Q. Li, M.-J. Fan, D.-S. Yang, H.-T. Zhu, *J. Org. Chem.* 2019, **84**, 8497.
- S5 Senkus, M., Brown, W. G. *J. Org. Chem.* 1938, **2**, 569.

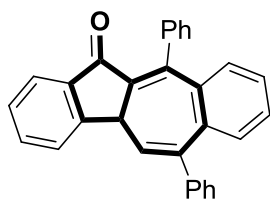

**6,11-diphenyldibenzo[a,f]azulen-12(4bH)-one (3a):**

yellow solid (70mg, 89% yield); mp 190–192 °C;  $R_f = 0.40$  (PE/EA = 30:1).

$^1\text{H NMR}$  (400 MHz,  $\text{CDCl}_3$ )  $\delta$  7.76 (d,  $J = 7.6$  Hz, 1H), 7.64 (d,  $J = 3.7$  Hz, 2H), 7.46 – 7.38 (m, 4H), 7.35 (d,  $J = 7.7$  Hz, 1H), 7.33 – 7.23 (m, 8H), 7.23 – 7.17 (m, 2H), 6.07 (d,  $J = 5.0$  Hz, 1H), 3.95 (d,  $J = 5.0$  Hz, 1H).  $^{13}\text{C}$  { $^1\text{H}$ } NMR (100 MHz,  $\text{CDCl}_3$ )  $\delta$  190.1, 151.6, 145.3, 142.4, 141.0, 140.9, 140.0, 139.6, 139.1, 138.0, 135.0, 134.5, 131.7, 130.8, 130.2, 129.1, 128.9, 128.4, 128.2, 128.1, 128.0, 127.6, 127.5, 126.7, 125.5, 124.1, 42.0. HRMS (ESI) calcd. for  $\text{C}_{30}\text{H}_{21}\text{O}$  [ $\text{M}+\text{H}$ ] $^+$ : 397.1587, found: 397.1585.

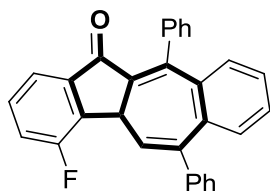

**4-fluoro-6,11-diphenyldibenzo[a,f]azulen-12(4bH)-one (3b):**

yellow solid (50mg, 61% yield); mp 230–232 °C;  $R_f = 0.40$  (PE/EA = 30:1).

$^1\text{H NMR}$  (400 MHz,  $\text{CDCl}_3$ )  $\delta$  7.57 (d,  $J = 7.5$  Hz, 1H), 7.43 (dd,  $J = 7.7, 5.1$  Hz, 4H), 7.38 – 7.24 (m, 10H), 7.22 (dd,  $J = 5.3, 2.0$  Hz, 2H), 6.12 (d,  $J = 5.0$  Hz, 1H), 4.11 (d,  $J = 5.0$  Hz, 1H).  $^{13}\text{C}$  { $^1\text{H}$ } NMR (100 MHz,  $\text{CDCl}_3$ )  $\delta$  189.0 (d,  $J = 2.5$  Hz), 160.0 (d,  $J = 251.4$  Hz), 146.5, 143.0 (d,  $J = 4.4$  Hz), 142.4, 141.2, 140.7, 139.6, 138.9, 137.1, 136.9, 132.9, 131.8, 131.0, 130.2 (d,  $J = 6.3$  Hz), 130.1, 129.1, 128.4 (d,  $J = 3.4$  Hz), 128.1, 127.9, 127.7, 126.9, 121.1 (d,  $J = 19.9$  Hz), 120.0 (d,  $J = 3.8$  Hz), 39.0. HRMS (ESI) calcd. for  $\text{C}_{30}\text{H}_{20}\text{FO}$  [ $\text{M}+\text{H}$ ] $^+$ : 415.1493, found: 415.1490.

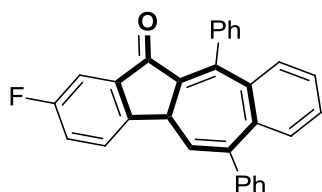

**2-fluoro-6,11-diphenyldibenzo[a,f]azulen-12(4bH)-one (3c):**

yellow solid (74mg, 90% yield); mp 240–242 °C;  $R_f = 0.40$  (PE/EA = 30:1).

$^1\text{H NMR}$  (400 MHz, acetone)  $\delta$  7.87 (dd,  $J = 8.4, 4.6$  Hz, 1H), 7.54 (ddd,  $J = 9.0, 8.5, 2.6$  Hz, 1H), 7.44 – 7.39 (m, 3H), 7.38 – 7.25 (m, 11H), 7.17 – 7.12 (m, 1H), 6.11 (d,  $J = 5.0$  Hz, 1H), 3.90 (d,  $J = 5.0$  Hz, 1H).  $^{13}\text{C}$  { $^1\text{H}$ } NMR (100 MHz, acetone)  $\delta$  188.9 (d,  $J = 3.0$  Hz), 163.6 (d,  $J = 246.5$  Hz), 147.9 (d,  $J = 2.2$  Hz), 146.1, 143.1, 142.5 (d,  $J = 7.3$  Hz), 141.8, 141.5, 140.3, 140.0, 139.0 (d,  $J = 1.0$  Hz), 135.2, 132.3, 131.3, 131.1, 129.6, 129.2, 129.0 (d,  $J = 8.2$  Hz), 128.8, 128.6, 128.5, 128.4, 127.6, 123.1 (d,  $J = 23.7$  Hz), 109.9 (d,  $J = 22.2$  Hz), 42.1. HRMS (ESI) calcd. for  $\text{C}_{30}\text{H}_{20}\text{FO}$  [ $\text{M}+\text{H}$ ] $^+$ : 415.1493, found: 415.1488.



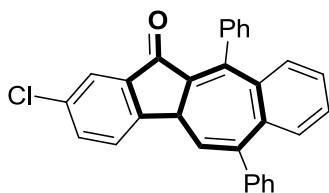

**2-chloro-6,11-diphenyldibenzo[a,f]azulen-12(4bH)-one (3d):**

Yellow solid (79mg, 92% yield); mp 200-202 °C;  $R_f = 0.40$  (PE/EA = 30:1).

$^1\text{H NMR}$  (400 MHz,  $\text{CDCl}_3$ )  $\delta$  7.70 (d,  $J = 1.7$  Hz, 1H), 7.64 – 7.57 (m, 2H), 7.43 (dd,  $J = 4.2, 2.3$  Hz, 3H), 7.37 – 7.23 (m, 9H), 7.22 – 7.17 (m, 2H), 6.03 (d,  $J = 5.0$  Hz, 1H), 3.93 (d,  $J = 5.0$  Hz, 1H).  $^{13}\text{C}$   $\{^1\text{H}\}$  NMR (100 MHz,  $\text{CDCl}_3$ )  $\delta$  188.8, 149.6, 146.2, 142.3, 141.6, 141.2, 140.9, 139.6, 138.9, 137.7, 135.0, 134.6, 133.7, 131.8, 130.8, 130.1, 129.0, 128.5, 128.4, 128.1, 127.8, 127.7, 126.9, 126.8, 124.1, 41.7. HRMS (ESI) calcd. for  $\text{C}_{30}\text{H}_{20}\text{ClO}$   $[\text{M}+\text{H}]^+$ : 431.1197, found: 431.1186.

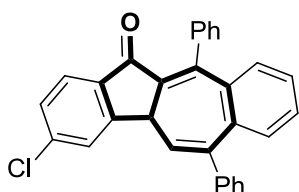

**3-chloro-6,11-diphenyldibenzo[a,f]azulen-12(4bH)-one (3e):**

Yellow solid (74mg, 86% yield); mp 138-140 °C;  $R_f = 0.40$  (PE/EA = 30:1).

$^1\text{H NMR}$  (400 MHz,  $\text{CDCl}_3$ )  $\delta$  7.69 (d,  $J = 8.1$  Hz, 1H), 7.66 – 7.63 (m, 1H), 7.46 – 7.38 (m, 4H), 7.38 – 7.24 (m, 9H), 7.23 – 7.17 (m, 2H), 6.05 (d,  $J = 5.0$  Hz, 1H), 3.94 (d,  $J = 5.0$  Hz, 1H).  $^{13}\text{C}$   $\{^1\text{H}\}$  NMR (100 MHz,  $\text{CDCl}_3$ )  $\delta$  188.8, 153.0, 145.3, 142.3, 141.4, 141.2, 140.9, 139.5, 138.9, 138.6, 137.5, 133.4, 131.8, 130.9, 130.1, 129.0, 128.9, 128.5, 128.4, 128.1, 127.8, 126.9, 125.9, 125.4, 41.8. HRMS (ESI) calcd. for  $\text{C}_{31}\text{H}_{23}\text{O}_2$   $[\text{M}+\text{H}]^+$ : 427.1693, found: 427.1681.

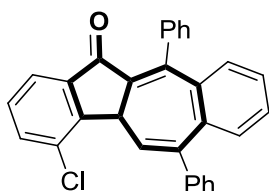

**4-chloro-6,11-diphenyldibenzo[a,f]azulen-12(4bH)-one (3f):**

Yellow solid (58mg, 68% yield); mp 184-186 °C;  $R_f = 0.40$  (PE/EA = 30:1).

$^1\text{H NMR}$  (400 MHz,  $\text{CDCl}_3$ )  $\delta$  7.69 – 7.65 (m, 1H), 7.62 (dd,  $J = 7.8, 0.9$  Hz, 1H), 7.44 (m, 3H), 7.41 – 7.36 (m, 2H), 7.34 – 7.25 (m, 8H), 7.24 – 7.18 (m, 2H), 6.09 (d,  $J = 5.1$  Hz, 1H), 4.04 (d,  $J = 5.1$  Hz, 1H).  $^{13}\text{C}$   $\{^1\text{H}\}$  NMR (100 MHz,  $\text{CDCl}_3$ )  $\delta$  189.1, 148.6, 146.4, 142.5, 142.0, 141.0, 140.6, 139.6, 139.0, 137.0, 134.6, 132.8, 132.2, 131.8, 131.0, 130.1, 129.8, 129.1, 128.4, 128.1, 127.8, 127.7, 126.8, 122.6, 41.3. HRMS (ESI) calcd. for  $\text{C}_{30}\text{H}_{20}\text{ClO}$   $[\text{M}+\text{H}]^+$ : 431.1197, found: 431.1187.

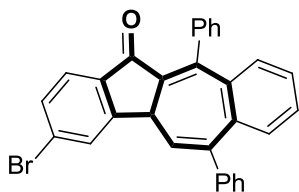

**3-bromo-6,11-diphenyldibenzo[a,f]azulen-12(4bH)-one (3g):**

Yellow solid (69mg, 73% yield); mp 162-164 °C;  $R_f = 0.40$  (PE/EA = 30:1).

$^1\text{H NMR}$  (400 MHz, acetone)  $\delta$  8.09 – 8.05 (m, 1H), 7.69 (dd,  $J = 8.1, 1.7$  Hz, 1H), 7.60 (d,  $J = 8.1$  Hz, 1H), 7.44 – 7.38 (m, 3H), 7.37 – 7.24 (m, 10H), 7.15 (dd,  $J = 7.8, 0.7$  Hz, 1H), 6.16 (d,  $J = 5.0$  Hz, 1H), 3.94 (d,  $J = 5.0$  Hz, 1H).  $^{13}\text{C}$   $\{^1\text{H}\}$  NMR (100 MHz, acetone)  $\delta$  188.7, 154.0, 146.0, 143.1, 141.8, 141.6, 140.3, 140.0, 139.6, 138.3, 134.6, 132.4, 132.3, 131.3, 131.1, 130.2, 130.0, 129.7, 129.2, 128.8, 128.6, 128.5, 128.4, 127.6, 125.8, 42.4. HRMS (ESI) calcd. for  $\text{C}_{30}\text{H}_{20}\text{BrO}$   $[\text{M}+\text{H}]^+$ : 475.0692, found: 475.0699.

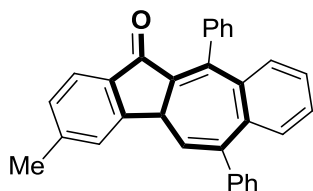**3-methyl-6,11-diphenyldibenzo[a,f]azulen-12(4bH)-one (3h):**

Yellow solid (28mg, 35% yield); mp 160-162 °C;  $R_f = 0.40$  (PE/EA = 30:1).

$^1\text{H NMR}$  (400 MHz,  $\text{CDCl}_3$ )  $\delta$  7.65 (d,  $J = 7.8$  Hz, 1H), 7.46 – 7.40 (m, 4H), 7.37 – 7.23 (m, 10H), 7.23 – 7.19 (m, 2H), 6.07 (d,  $J = 5.0$  Hz, 1H), 3.92 (d,  $J = 5.0$  Hz, 2H), 2.50 (s, 3H).  $^{13}\text{C}$   $\{^1\text{H}\}$  NMR (100 MHz,  $\text{CDCl}_3$ )  $\delta$  189.8, 152.1, 146.3, 144.9, 142.5, 141.2, 140.9, 139.6, 139.3, 138.5, 137.9, 134.6, 131.7, 130.8, 130.2, 129.4, 129.0, 128.4, 128.1, 128.0, 127.6, 127.4, 126.7, 125.9, 124.1, 41.9, 22.4. HRMS (ESI) calcd. for  $\text{C}_{31}\text{H}_{23}\text{O}$   $[\text{M}+\text{H}]^+$ : 411.1743, found: 411.1736.

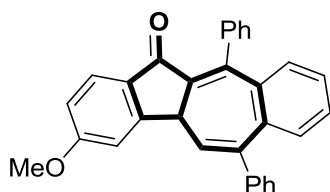**3-methoxy-6,11-diphenyldibenzo[a,f]azulen-12(4bH)-one (3i):**

Yellow solid (35mg, 41% yield); mp 174-176 °C;  $R_f = 0.30$  (PE/EA = 30:1).

$^1\text{H NMR}$  (400 MHz, acetone)  $\delta$  7.61 (d,  $J = 8.5$  Hz, 1H), 7.50 – 7.37 (m, 4H), 7.37 – 7.30 (m, 7H), 7.30 – 7.24 (m, 3H), 7.14 (dd,  $J = 6.4, 5.7$  Hz, 1H), 7.04 (dd,  $J = 8.5, 2.3$  Hz, 1H), 6.15 (d,  $J = 5.0$  Hz, 1H), 3.97 (s, 3H), 3.86 (d,  $J = 5.0$  Hz, 1H).  $^{13}\text{C}$   $\{^1\text{H}\}$  NMR (100 MHz, acetone)  $\delta$  188.8, 166.5, 155.0, 144.1, 143.2, 142.2, 141.5, 140.2, 139.6, 135.2, 134.0, 132.2, 131.2, 129.6, 129.2, 128.5, 128.4, 128.3, 128.1, 127.5, 126.0, 116.6, 110.2, 56.3, 42.7. HRMS (ESI) calcd. for  $\text{C}_{31}\text{H}_{23}\text{O}_2$   $[\text{M}+\text{H}]^+$ : 427.1693, found: 427.1681.

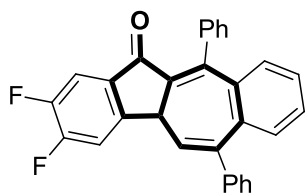**2,3-difluoro-6,11-diphenyldibenzo[a,f]azulen-12(4bH)-one (3j):**

yellow solid (71mg, 82% yield); mp 180–182 °C;  $R_f = 0.40$  (PE/EA = 30:1).

**<sup>1</sup>H NMR (400 MHz, acetone)** δ 7.84 (dd, *J* = 9.9, 6.9 Hz, 1H), 7.58 – 7.51 (m, 1H), 7.44 – 7.38 (m, 3H), 7.38 – 7.30 (m, 7H), 7.30 – 7.24 (m, 3H), 7.14 (m, 1H), 6.14 (d, *J* = 5.0 Hz, 1H), 3.93 (d, *J* = 5.0 Hz, 1H). **<sup>13</sup>C {<sup>1</sup>H} NMR (100 MHz, acetone)** δ 187.8 (d, *J* = 2.7 Hz), 155.7 (dd, *J* = 255.6, 14.2 Hz), 152.0 (dd, *J* = 249.8, 14.4 Hz), 149.3 (dd, *J* = 8.2, 2.8 Hz), 146.0, 143.0, 142.0, 141.6, 140.3, 139.8, 138.3, 137.4 (dd, *J* = 5.4, 2.5 Hz), 134.5, 132.4, 131.3, 131.1, 129.7, 129.2, 128.9, 128.6, 128.5, 128.4, 127.7, 115.9 (d, *J* = 18.9 Hz), 112.4 (dd, *J* = 17.9, 1.8 Hz), 42.2 (d, *J* = 1.6 Hz). **HRMS (ESI)** calcd. for C<sub>30</sub>H<sub>18</sub>F<sub>2</sub>NaO [M+Na]<sup>+</sup>: 455.1218, found: 455.1227.

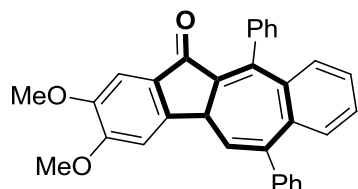

**2,3-dimethoxy-6,11-diphenyldibenzo[a,f]azulen-12(4bH)-one (3k):**

Yellow solid (49mg, 54% yield); mp 136-138 °C; R<sub>f</sub> = 0.30 (PE/EA = 20:1).

**<sup>1</sup>H NMR (400 MHz, CDCl<sub>3</sub>)** δ 7.45 – 7.40 (m, 3H), 7.36 – 7.23 (m, 9H), 7.23 – 7.14 (m, 3H), 7.08 (s, 1H), 6.10 (d, *J* = 5.0 Hz, 1H), 4.04 (s, 3H), 3.94 – 3.91 (m, 1H), 3.90 (s, 3H). **<sup>13</sup>C {<sup>1</sup>H} NMR (100 MHz, CDCl<sub>3</sub>)** δ 189.0, 155.9, 150.0, 146.6, 143.8, 142.5, 141.3, 140.9, 139.5, 139.2, 138.8, 134.5, 133.5, 131.7, 130.8, 130.3, 129.0, 128.4, 128.1, 128.0, 127.6, 127.3, 126.7, 106.5, 105.0, 56.5, 56.3, 41.8. **HRMS (ESI)** calcd. for C<sub>32</sub>H<sub>25</sub>O<sub>3</sub> [M+H]<sup>+</sup>: 457.1798, found: 457.1793.

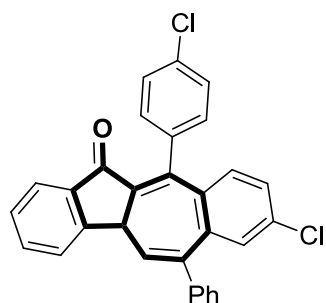

**8-chloro-11-(4-chlorophenyl)-6-phenyldibenzo[a,f]azulen-12(4bH)-one (3l):**

Yellow solid (42mg, 45% yield); mp 236-238 °C; R<sub>f</sub> = 0.40 (PE/EA = 30:1).

**<sup>1</sup>H NMR (400 MHz, CDCl<sub>3</sub>)** δ 7.77 (d, *J* = 7.7 Hz, 1H), 7.67 (m, 2H), 7.48 – 7.38 (m, 3H), 7.38 – 7.28 (m, 4H), 7.27 – 7.17 (m, 5H), 7.11 (d, *J* = 8.6 Hz, 1H), 6.09 (d, *J* = 5.0 Hz, 1H), 3.95 (d, *J* = 5.0 Hz, 1H). **<sup>13</sup>C {<sup>1</sup>H} NMR (100 MHz, CDCl<sub>3</sub>)** δ 190.0, 151.3, 143.0, 141.6, 141.3, 140.1, 140.0, 139.2, 138.4, 137.0, 135.5, 135.4, 134.6, 133.8, 133.1, 131.7, 130.5, 128.9, 128.7, 128.5, 128.4, 128.0, 127.3, 125.6, 124.3, 42.0. **HRMS (ESI)** calcd. for C<sub>30</sub>H<sub>19</sub>Cl<sub>2</sub>O [M+H]<sup>+</sup>: 465.0807, found: 465.0803.

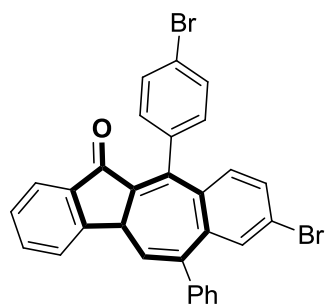

**8-bromo-11-(4-bromophenyl)-6-phenyldibenzo[a,f]azulen-12(4bH)-one (3m):**

Yellow solid (60mg, 54% yield); mp 154-156 °C;  $R_f = 0.40$  (PE/EA = 30:1).

$^1\text{H NMR}$  (400 MHz,  $\text{CDCl}_3$ )  $\delta$  7.76 (d,  $J = 7.7$  Hz, 1H), 7.68 (m, 2H), 7.56 (t,  $J = 5.3$  Hz, 2H), 7.50 (d,  $J = 2.1$  Hz, 1H), 7.47 – 7.42 (m, 1H), 7.37 – 7.29 (m, 4H), 7.26 – 7.22 (m, 2H), 7.17 – 7.11 (m, 2H), 7.03 (d,  $J = 8.6$  Hz, 1H), 6.09 (d,  $J = 5.0$  Hz, 1H), 3.94 (d,  $J = 5.0$  Hz, 1H).  $^{13}\text{C}$   $\{^1\text{H}\}$  NMR (100 MHz,  $\text{CDCl}_3$ )  $\delta$  190.0, 151.3, 143.0, 141.5, 141.4, 140.0, 139.8, 139.5, 138.5, 137.4, 135.5, 135.4, 133.4, 133.2, 131.9, 131.4, 130.1, 128.9, 128.7, 128.4, 128.1, 125.6, 124.3, 122.9, 122.2, 42.0. HRMS (ESI) calcd. for  $\text{C}_{30}\text{H}_{19}\text{Br}_2\text{O}$   $[\text{M}+\text{H}]^+$ : 552.9797, found: 552.9792.

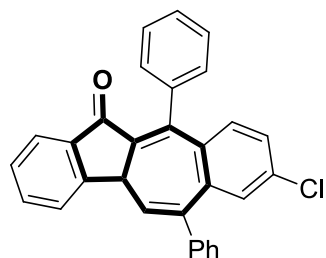

**8-chloro-6,11-diphenyldibenzo[a,f]azulen-12(4bH)-one (3n):**

Yellow solid (28mg, 33% yield); mp 86-88 °C;  $R_f = 0.40$  (PE/EA = 30:1).

$^1\text{H NMR}$  (400 MHz,  $\text{CDCl}_3$ )  $\delta$  7.76 (d,  $J = 7.6$  Hz, 1H), 7.71 – 7.64 (m, 2H), 7.46 – 7.41 (m, 4H), 7.37 – 7.30 (m, 4H), 7.30 – 7.24 (m, 4H), 7.20 – 7.12 (m, 2H), 6.10 (d,  $J = 5.0$  Hz, 1H), 3.96 (d,  $J = 5.0$  Hz, 1H).  $^{13}\text{C}$   $\{^1\text{H}\}$  NMR (100 MHz,  $\text{CDCl}_3$ )  $\delta$  190.0, 151.3, 144.4, 141.7, 141.2, 140.1, 140.0, 139.6, 138.7, 138.1, 135.5, 135.2, 133.6, 133.3, 130.3, 130.2, 128.9, 128.6, 128.5, 128.3, 128.2, 128.0, 127.1, 125.6, 124.3, 42.0. HRMS (ESI) calcd. for  $\text{C}_{30}\text{H}_{20}\text{ClO}$   $[\text{M}+\text{H}]^+$ : 431.1197, found: 431.1187.

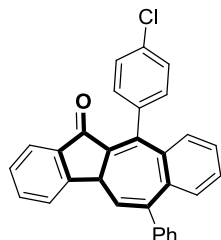

**11-(4-chlorophenyl)-6-phenyldibenzo[a,f]azulen-12(4bH)-one (3n'):**

Yellow solid (39mg, 45% yield); mp 181-183 °C;  $R_f = 0.40$  (PE/EA = 30:1).

$^1\text{H NMR}$  (400 MHz,  $\text{CDCl}_3$ )  $\delta$  7.75 – 7.74 (m, 1H), 7.70 – 7.62 (m, 2H), 7.48 – 7.35 (m, 4H), 7.34 – 7.20 (m, 9H), 7.19 – 7.14 (m, 1H), 6.07 (d,  $J = 5.0$  Hz, 1H), 3.96 (d,  $J = 5.0$  Hz, 1H).  $^{13}\text{C}$   $\{^1\text{H}\}$  NMR (100 MHz,  $\text{CDCl}_3$ )  $\delta$  190.2, 151.6, 143.9, 141.0, 140.6, 139.9, 139.7, 138.3, 137.5, 135.3, 134.5, 134.3, 131.7, 131.7, 130.9, 129.0, 128.4, 128.3, 128.3, 127.8, 127.7, 126.9, 125.6, 124.2, 42.0. HRMS (ESI) calcd. for  $\text{C}_{30}\text{H}_{20}\text{ClO}$   $[\text{M}+\text{H}]^+$ : 431.1197, found: 431.1193.

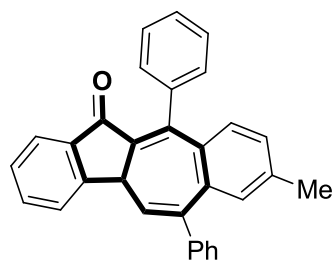

**8-methyl-6,11-diphenyldibenzo[a,f]azulen-12(4bH)-one (3o):**

Yellow solid (37mg, 45% yield); mp 105-107 °C;  $R_f = 0.40$  (PE/EA = 30:1).

$^1\text{H NMR}$  (400 MHz,  $\text{CDCl}_3$ )  $\delta$  7.75 (d,  $J = 7.6$  Hz, 1H), 7.68 – 7.62 (m, 2H), 7.47 – 7.39 (m, 4H), 7.36 – 7.23 (m, 7H), 7.17 (d,  $J = 7.5$  Hz, 1H), 7.10 (d,  $J = 8.2$  Hz, 1H), 7.03 (dd,  $J = 8.2, 1.3$  Hz, 1H), 6.05 (d,  $J = 5.0$  Hz, 1H), 3.96 (d,  $J = 5.0$  Hz, 1H), 2.29 (s, 3H).  $^{13}\text{C}$   $\{^1\text{H}\}$  NMR (100 MHz,  $\text{CDCl}_3$ )  $\delta$  190.2, 151.6, 145.6, 142.6, 140.9, 140.2, 139.6, 139.3, 138.5, 137.7, 137.2, 134.9, 134.3, 131.8, 131.0, 130.2, 129.0, 128.4, 128.2, 128.1, 128.0, 127.9, 127.5, 125.5, 124.1, 42.1, 21.5. HRMS (ESI) calcd. for  $\text{C}_{31}\text{H}_{23}\text{O}$   $[\text{M}+\text{H}]^+$ : 411.1743, found: 431.1746.

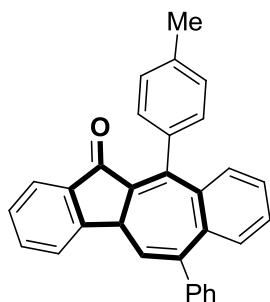

**6-phenyl-11-(p-tolyl)dibenzo[a,f]azulen-12(4bH)-one (3o'):**

Yellow solid (33mg, 40% yield); mp 70-72 °C;  $R_f = 0.40$  (PE/EA = 30:1).

$^1\text{H NMR}$  (400 MHz,  $\text{CDCl}_3$ )  $\delta$  7.78 – 7.74 (m, 1H), 7.67 – 7.63 (m, 2H), 7.45 – 7.39 (m, 1H), 7.37 – 7.21 (m, 11H), 7.21 – 7.15 (m, 2H), 6.07 (d,  $J = 5.0$  Hz, 1H), 3.95 (d,  $J = 5.0$  Hz, 1H), 2.43 (s, 3H).  $^{13}\text{C}$   $\{^1\text{H}\}$  NMR (100 MHz,  $\text{CDCl}_3$ )  $\delta$  190.2, 151.6, 145.7, 142.5, 141.3, 140.9, 140.2, 139.7, 138.1, 137.9, 136.3, 135.0, 134.6, 131.9, 130.7, 130.2, 129.0, 128.8, 128.4, 128.1, 127.6, 127.5, 126.7, 125.5, 124.2, 42.1, 21.6. HRMS (ESI) calcd. for  $\text{C}_{31}\text{H}_{23}\text{O}$   $[\text{M}+\text{H}]^+$ : 411.1743, found: 431.1740.

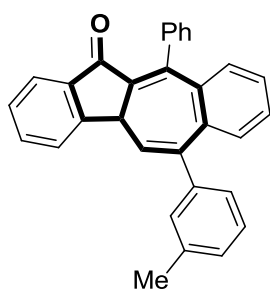

**11-phenyl-6-(m-tolyl)dibenzo[a,f]azulen-12(4bH)-one (3p):**

Yellow solid (52mg, 64% yield); mp 200-202 °C;  $R_f = 0.40$  (PE/EA = 30:1).

$^1\text{H NMR}$  (400 MHz,  $\text{CDCl}_3$ )  $\delta$  7.76 (d,  $J = 7.6$  Hz, 1H), 7.66 (dd,  $J = 4.7, 0.9$  Hz, 2H), 7.46 – 7.39 (m, 4H), 7.36 (d,  $J = 7.7$  Hz, 1H), 7.24 (m, 6H), 7.12 – 7.01 (m, 3H), 6.06 (d,  $J = 5.0$  Hz, 1H), 3.95 (d,  $J = 5.0$  Hz, 1H), 2.33 (s, 3H).  $^{13}\text{C}$   $\{^1\text{H}\}$  NMR (100 MHz,  $\text{CDCl}_3$ )  $\delta$  190.2, 151.6, 145.3, 142.4, 141.1, 141.0, 140.1, 139.7, 139.2, 138.0, 137.9, 135.0, 134.3, 131.7, 130.8, 130.2, 129.6, 128.4, 128.3, 128.2, 128.1, 128.0, 127.5, 126.7, 126.2, 125.6, 124.2, 42.0, 21.5. HRMS (ESI) calcd. for  $\text{C}_{31}\text{H}_{23}\text{O}$   $[\text{M}+\text{H}]^+$ : 411.1743, found: 411.1751.

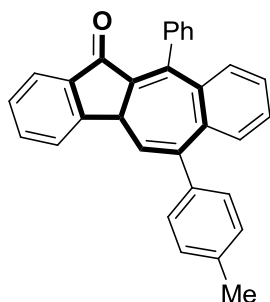

**11-phenyl-6-(p-tolyl)dibenzo[a,f]azulen-12(4bH)-one (3q):**

Yellow solid (37mg, 45% yield); mp 218-220 °C;  $R_f = 0.40$  (PE/EA = 30:1).

$^1\text{H NMR}$  (400 MHz,  $\text{CDCl}_3$ )  $\delta$  7.76 (dd,  $J = 8.0, 4.7$  Hz, 1H), 7.68 – 7.65 (m, 2H), 7.46 – 7.40 (m, 4H), 7.37 (d,  $J = 7.7$  Hz, 1H), 7.31 – 7.23 (m, 4H), 7.22 – 7.08 (m, 6H), 6.05 (d,  $J = 5.0$  Hz, 1H), 3.95 (d,  $J = 5.0$  Hz, 1H), 2.35 (s, 3H).  $^{13}\text{C}$   $\{^1\text{H}\}$  NMR (100 MHz,  $\text{CDCl}_3$ )  $\delta$  190.3, 151.7, 145.3, 141.1, 140.8, 140.1, 139.8, 139.7, 139.2, 137.4, 135.0, 133.9, 131.7, 130.8, 130.2, 129.3, 129.1, 128.9, 128.7, 128.3, 128.2, 128.1, 128.0, 127.5, 126.7, 125.6, 124.2, 42.1, 21.3. HRMS (ESI) calcd. for  $\text{C}_{31}\text{H}_{23}\text{O}$   $[\text{M}+\text{H}]^+$ : 411.1743, found: 411.1734.

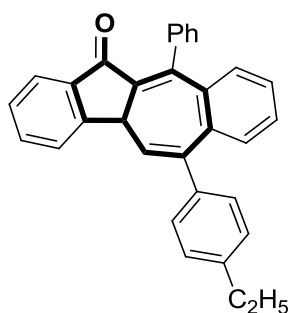

**6-(4-ethylphenyl)-11-phenyldibenzo[a,f]azulen-12(4bH)-one (3r):**

Yellow solid (55mg, 65% yield); mp 194-196 °C;  $R_f = 0.40$  (PE/EA = 30:1).

$^1\text{H NMR}$  (400 MHz,  $\text{CDCl}_3$ )  $\delta$  7.76 (d,  $J = 7.5$  Hz, 1H), 7.66 (dd,  $J = 4.8, 1.0$  Hz, 2H), 7.46 – 7.36 (m, 5H), 7.31 – 7.23 (m, 3H), 7.22 – 7.11 (m, 6H), 6.06 (d,  $J = 5.0$  Hz, 1H), 3.96 (d,  $J = 5.0$  Hz, 1H), 2.65 (q,  $J = 7.6$  Hz, 2H), 1.24 (t,  $J = 7.6$  Hz, 3H).  $^{13}\text{C}$   $\{^1\text{H}\}$  NMR (100 MHz,  $\text{CDCl}_3$ )  $\delta$  190.3, 151.7, 145.3, 143.8, 141.1, 140.8, 140.1, 140.0, 139.8, 139.2, 138.1, 135.0, 133.9, 131.7, 130.8, 130.2, 128.9, 128.2, 128.1, 128.0, 127.9, 127.5, 126.7, 125.6, 124.2, 42.0, 28.7, 15.7. HRMS (ESI) calcd. for  $\text{C}_{32}\text{H}_{25}\text{O}$   $[\text{M}+\text{H}]^+$ : 425.1900, found: 425.1906.

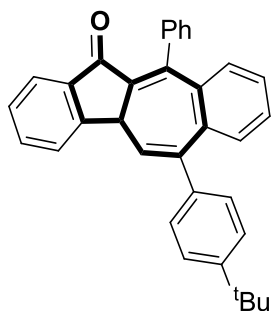

**6-(4-(tert-butyl)phenyl)-11-phenyldibenzo[a,f]azulen-12(4bH)-one (3s):**

Yellow solid (60mg, 67% yield); mp 118-120 °C;  $R_f = 0.40$  (PE/EA = 30:1).

**<sup>1</sup>H NMR (400 MHz, CDCl<sub>3</sub>)** δ 7.75 (d, *J* = 7.6 Hz, 1H), 7.66 (d, *J* = 3.7 Hz, 2H), 7.45 – 7.39 (m, 5H), 7.34 – 7.23 (m, 6H), 7.22 – 7.17 (m, 3H), 6.07 (d, *J* = 5.0 Hz, 1H), 3.96 (d, *J* = 5.0 Hz, 1H), 1.32 (s, 9H). **<sup>13</sup>C {<sup>1</sup>H} NMR (100 MHz, CDCl<sub>3</sub>)** δ 190.2, 151.7, 150.7, 145.3, 141.1, 140.7, 140.1, 139.7, 139.5, 139.2, 138.1, 135.0, 134.0, 131.7, 130.9, 130.2, 128.6, 128.2, 128.1, 128.0, 127.5, 126.7, 125.6, 125.3, 124.2, 42.0, 34.7, 31.5. **HRMS (ESI)** calcd. for C<sub>34</sub>H<sub>29</sub>O [M+H]<sup>+</sup>: 453.2213, found: 453.2211.

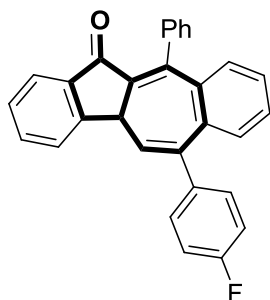

**6-(4-fluorophenyl)-11-phenyldibenzo[a,f]azulen-12(4bH)-one (3t):**

Yellow solid (43mg, 52% yield); mp 204-206 °C; R<sub>f</sub> = 0.40 (PE/EA = 30:1).

**<sup>1</sup>H NMR (400 MHz, CDCl<sub>3</sub>)** δ 7.77 (d, *J* = 7.7 Hz, 1H), 7.70 – 7.63 (m, 2H), 7.47 – 7.41 (m, 4H), 7.31 – 7.20 (m, 8H), 7.05 – 6.97 (m, 2H), 6.04 (d, *J* = 5.0 Hz, 1H), 3.96 (d, *J* = 5.0 Hz, 1H). **<sup>13</sup>C {<sup>1</sup>H} NMR (100 MHz, CDCl<sub>3</sub>)** δ 190.2, 162.5 (d, *J* = 246.9 Hz), 151.5, 145.3, 141.1, 140.1, 139.9, 139.5, 139.1, 138.6 (d, *J* = 3.4 Hz), 138.1, 135.1, 134.4, 131.9, 130.6 (d, *J* = 4.1 Hz), 130.2, 128.3 (d, *J* = 4.8 Hz), 128.1, 127.7, 126.9, 125.5, 124.2, 115.3 (d, *J* = 21.4 Hz), 42.0. **HRMS (ESI)** calcd. for C<sub>30</sub>H<sub>19</sub>FN<sub>1</sub>O [M+H]<sup>+</sup>: 437.1312, found: 437.1310.

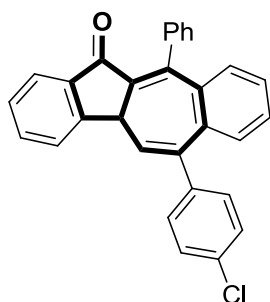

**6-(4-chlorophenyl)-11-phenyldibenzo[a,f]azulen-12(4bH)-one (3u):**

Yellow solid (63mg, 73% yield); mp 190-192 °C; R<sub>f</sub> = 0.40 (PE/EA = 30:1).

**<sup>1</sup>H NMR (400 MHz, CDCl<sub>3</sub>)** δ 7.76 (d, *J* = 7.7 Hz, 1H), 7.70 – 7.61 (m, 2H), 7.47 – 7.40 (m, 4H), 7.33 – 7.24 (m, 6H), 7.21 (m, 4H), 6.07 (d, *J* = 5.0 Hz, 1H), 3.96 (d, *J* = 5.0 Hz, 1H). **<sup>13</sup>C {<sup>1</sup>H} NMR (100 MHz, CDCl<sub>3</sub>)** δ 190.1, 151.4, 145.4, 141.1, 140.9, 140.1, 139.8, 139.2, 139.0, 138.0, 135.1, 134.8, 133.6, 131.9, 130.6, 130.3, 130.2, 128.6, 128.3, 128.3, 128.1, 127.7, 127.0, 125.5, 124.2, 42.0. **HRMS (ESI)** calcd. for C<sub>30</sub>H<sub>20</sub>ClO [M+H]<sup>+</sup>: 431.1197, found: 431.1208.

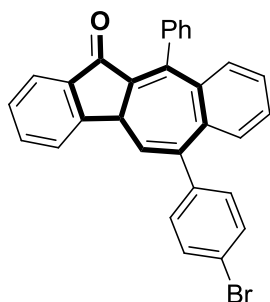

**6-(4-bromophenyl)-11-phenyldibenzo[a,f]azulen-12(4bH)-one (3v):**

Yellow solid (59mg, 63% yield); mp 192-194 °C;  $R_f = 0.40$  (PE/EA = 30:1).

$^1\text{H NMR}$  (400 MHz,  $\text{CDCl}_3$ )  $\delta$  7.76 (d,  $J = 7.7$  Hz, 1H), 7.70 – 7.61 (m, 2H), 7.47 – 7.38 (m, 6H), 7.34 – 7.19 (m, 6H), 7.17 – 7.09 (m, 2H), 6.07 (d,  $J = 5.0$  Hz, 1H), 3.95 (d,  $J = 5.0$  Hz, 1H).  $^{13}\text{C}$  { $^1\text{H}$ } NMR (100 MHz,  $\text{CDCl}_3$ )  $\delta$  190.1, 151.3, 145.3, 141.4, 141.1, 140.1, 139.9, 139.1, 139.0, 138.0, 135.1, 134.8, 131.9, 131.6, 130.6, 130.5, 130.2, 128.3, 128.2, 128.1, 127.7, 127.0, 125.5, 124.2, 121.8, 42.0. **HRMS (ESI)** calcd. for  $\text{C}_{30}\text{H}_{20}\text{BrO}$   $[\text{M}+\text{H}]^+$ : 475.0692, found: 475.0695.

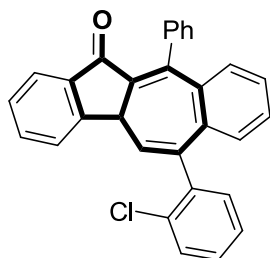

**6-(2-chlorophenyl)-11-phenyldibenzo[a,f]azulen-12(4bH)-one (3w):**

Yellow solid (66mg, 77% yield); mp 166-168 °C;  $R_f = 0.40$  (PE/EA = 30:1).

$^1\text{H NMR}$  (400 MHz,  $\text{CDCl}_3$ )  $\delta$  7.76 (d,  $J = 7.6$  Hz, 1H), 7.64 (dd,  $J = 4.8, 1.0$  Hz, 2H), 7.45 – 7.38 (m, 4H), 7.36 – 7.25 (m, 5H), 7.26 – 7.11 (m, 5H), 6.01 (d,  $J = 4.7$  Hz, 1H), 4.05 (d,  $J = 4.6$  Hz, 1H).  $^{13}\text{C}$  { $^1\text{H}$ } NMR (100 MHz,  $\text{CDCl}_3$ )  $\delta$  190.2, 151.2, 146.0, 140.9, 140.6, 140.1, 139.5, 139.3, 137.4, 137.2, 135.0, 133.8, 132.3, 132.1, 130.1, 130.0, 129.2, 128.9, 128.2, 128.1, 128.0, 127.9, 126.8, 126.6, 125.5, 124.2, 41.8. **HRMS (ESI)** calcd. for  $\text{C}_{30}\text{H}_{20}\text{ClO}$   $[\text{M}+\text{H}]^+$ : 431.1197, found: 431.1194.

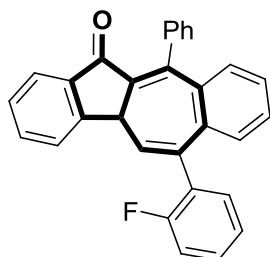

**6-(2-fluorophenyl)-11-phenyldibenzo[a,f]azulen-12(4bH)-one (3x):**

Yellow solid (53mg, 65% yield); mp 158-160 °C;  $R_f = 0.40$  (PE/EA = 30:1).

$^1\text{H NMR}$  (400 MHz,  $\text{CDCl}_3$ )  $\delta$  7.76 (d,  $J = 7.7$  Hz, 1H), 7.68 – 7.63 (m, 2H), 7.46 – 7.39 (m, 4H), 7.35 (td,  $J = 7.6, 1.8$  Hz, 1H), 7.32 – 7.24 (m, 5H), 7.23 – 7.18 (m, 2H), 7.14 (td,  $J = 7.5, 1.2$  Hz, 1H), 7.05 – 6.96 (m, 1H), 6.09 (d,  $J = 4.8$  Hz, 1H), 4.02 (d,  $J = 4.8$  Hz, 1H).  $^{13}\text{C}$  { $^1\text{H}$ } NMR (100 MHz,  $\text{CDCl}_3$ )  $\delta$  190.1, 160.2 (d,  $J = 248.4$  Hz),



151.3, 145.7, 140.3, 140.1, 139.6, 139.3, 137.7, 137.3, 135.4, 135.1, 132.0, 131.6 (d,  $J = 3.3$  Hz), 130.1, 130.0, 129.9, 129.6 (d,  $J = 8.2$  Hz), 129.2, 128.2 (d,  $J = 1.5$  Hz), 128.0, 127.8, 126.7, 125.6, 124.2 (d,  $J = 3.7$  Hz), 116.0 (d,  $J = 22.1$  Hz), 42.0. **HRMS (ESI)** calcd. for  $C_{30}H_{20}FO$   $[M+H]^+$ : 415.1493, found: 415.1495.

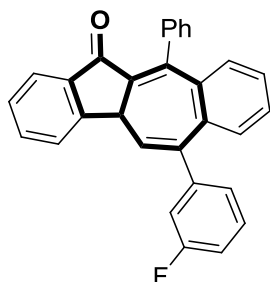

**6-(3-fluorophenyl)-11-phenyldibenzo[a,f]azulen-12(4bH)-one (3y):**

Yellow solid (65mg, 79% yield); mp 178-180 °C;  $R_f = 0.40$  (PE/EA = 30:1).

$^1H$  NMR (400 MHz,  $CDCl_3$ )  $\delta$  7.76 (d,  $J = 7.7$  Hz, 1H), 7.66 (dd,  $J = 6.3, 1.1$  Hz, 2H), 7.47 – 7.40 (m, 4H), 7.34 (d,  $J = 7.5$  Hz, 1H), 7.31 – 7.19 (m, 6H), 7.06 – 7.02 (m, 1H), 7.01 – 6.93 (m, 2H), 6.10 (d,  $J = 5.0$  Hz, 1H), 3.97 (d,  $J = 5.0$  Hz, 1H).  $^{13}C$  { $^1H$ } NMR (100 MHz,  $CDCl_3$ )  $\delta$  190.1, 162.9 (d,  $J = 245.9$  Hz), 151.3, 145.4, 144.6 (d,  $J = 7.6$  Hz), 141.1, 140.1, 139.9 (d,  $J = 2.2$  Hz), 139.0 (d,  $J = 6.3$  Hz), 138.0, 135.2 (d,  $J = 12.3$  Hz), 131.9, 130.6, 130.2, 129.9 (d,  $J = 8.4$  Hz), 128.3 (d,  $J = 2.9$  Hz), 128.1, 127.7, 127.0, 125.55, 124.7 (d,  $J = 2.8$  Hz), 124.2, 115.8 (d,  $J = 21.9$  Hz), 114.5 (d,  $J = 21.2$  Hz), 42.0. **HRMS (ESI)** calcd. for  $C_{30}H_{20}FO$   $[M+H]^+$ : 415.1493, found: 415.1489.

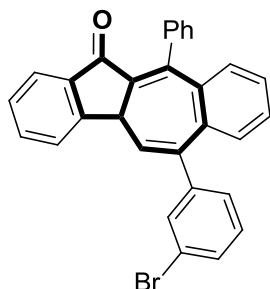

**6-(3-bromophenyl)-11-phenyldibenzo[a,f]azulen-12(4bH)-one (3z):**

Yellow solid (63mg, 67% yield); mp 194-196 °C;  $R_f = 0.40$  (PE/EA = 30:1).

$^1H$  NMR (400 MHz,  $CDCl_3$ )  $\delta$  7.77 (d,  $J = 7.7$  Hz, 1H), 7.67 (dd,  $J = 6.2, 1.1$  Hz, 2H), 7.48 – 7.39 (m, 6H), 7.32 – 7.20 (m, 6H), 7.18 (m, 2H), 6.09 (d,  $J = 5.0$  Hz, 1H), 3.97 (d,  $J = 5.0$  Hz, 1H).  $^{13}C$  { $^1H$ } NMR (100 MHz,  $CDCl_3$ )  $\delta$  190.0, 151.3, 145.4, 144.5, 141.1, 140.0, 139.7, 139.0, 138.9, 137.9, 135.4, 135.2, 131.9, 131.8, 130.7, 130.6, 130.2, 129.9, 128.3, 128.2, 128.1, 127.8, 127.7, 127.1, 125.6, 124.3, 122.6, 42.0. **HRMS (ESI)** calcd. for  $C_{30}H_{20}BrO$   $[M+H]^+$ : 475.0692, found: 475.0691.

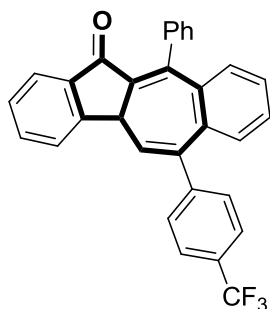

**11-phenyl-6-(4-(trifluoromethyl)phenyl)dibenzo[a,f]azulen-12(4bH)-one (3aa):**

Yellow solid (43mg, 46% yield); mp 116-118 °C;  $R_f = 0.40$  (PE/EA = 30:1).

$^1\text{H NMR}$  (400 MHz,  $\text{CDCl}_3$ )  $\delta$  7.77 (d,  $J = 7.7$  Hz, 1H), 7.71 – 7.64 (m, 2H), 7.57 (d,  $J = 8.2$  Hz, 2H), 7.46 – 7.42 (m, 3H), 7.39 (d,  $J = 8.0$  Hz, 2H), 7.31 – 7.21 (m, 7H), 6.15 (d,  $J = 5.0$  Hz, 1H), 4.00 (d,  $J = 5.0$  Hz, 1H).  $^{13}\text{C}$  { $^1\text{H}$ } NMR (100 MHz,  $\text{CDCl}_3$ )  $\delta$  190.0, 151.2, 146.1, 145.5, 141.2, 140.1, 139.9, 139.0, 138.8, 137.9, 136.0, 135.2, 132.0, 130.6, 129.7 (q,  $J = 33$  Hz), 128.1, 127.8, 127.2, 125.5, 125.4 (q,  $J = 3.8$  Hz), 124.3, 124.2 (q,  $J = 270.4$  Hz), 42.1. HRMS (ESI) calcd. for  $\text{C}_{31}\text{H}_{20}\text{F}_3\text{O}$   $[\text{M}+\text{H}]^+$ : 465.1461, found: 465.1467.

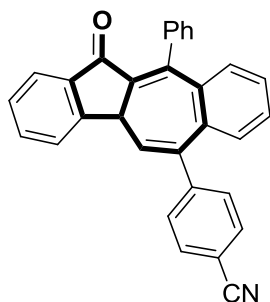

**4-(12-oxo-11-phenyl-4b,12-dihydrodibenzo[a,f]azulen-6-yl)benzonitrile (3ab):**

Yellow solid (30mg, 36% yield); mp 150-152 °C;  $R_f = 0.40$  (PE/EA = 30:1).

$^1\text{H NMR}$  (400 MHz,  $\text{CDCl}_3$ )  $\delta$  7.77 (d,  $J = 7.6$  Hz, 1H), 7.72 – 7.59 (m, 4H), 7.47 – 7.42 (m, 3H), 7.40 – 7.36 (m, 2H), 7.30 – 7.23 (m, 8H), 6.17 (d,  $J = 5.1$  Hz, 1H), 4.01 (d,  $J = 5.1$  Hz, 1H).  $^{13}\text{C}$  { $^1\text{H}$ } NMR (100 MHz,  $\text{CDCl}_3$ )  $\delta$  190.0, 151.0, 146.9, 145.5, 141.2, 139.6, 138.8, 138.3, 137.9, 136.8, 135.3, 132.3, 132.1, 130.5, 130.1, 129.6, 128.4, 128.2, 127.9, 127.4, 125.5, 124.4, 118.9, 111.4, 42.2. HRMS (ESI) calcd. for  $\text{C}_{31}\text{H}_{20}\text{NO}$   $[\text{M}+\text{H}]^+$ : 422.1539, found: 422.1545.

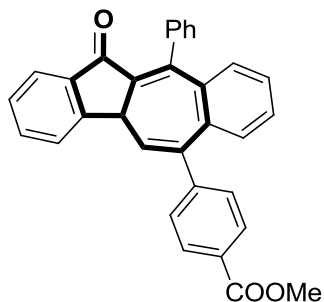

**methyl 4-(12-oxo-11-phenyl-4b,12-dihydrodibenzo[a,f]azulen-6-yl)benzoate (3ac):**

Yellow solid (47mg, 52% yield); mp 198-200 °C;  $R_f = 0.30$  (PE/EA = 30:1).

$^1\text{H}$  NMR (400 MHz,  $\text{CDCl}_3$ )  $\delta$  8.01 – 7.96 (m, 2H), 7.77 (d,  $J$  = 7.6 Hz, 1H), 7.70 – 7.65 (m, 2H), 7.47 – 7.41 (m, 4H), 7.37 – 7.32 (m, 2H), 7.32 – 7.26 (m, 4H), 7.26 – 7.21 (m, 2H), 6.17 (d,  $J$  = 5.1 Hz, 1H), 4.00 (d,  $J$  = 5.0 Hz, 1H), 3.91 (s, 3H).  $^{13}\text{C}$   $\{^1\text{H}\}$  NMR (100 MHz,  $\text{CDCl}_3$ )  $\delta$  190.0, 167.0, 151.3, 146.9, 140.2, 139.0, 138.9, 135.9, 135.2, 131.9, 130.6, 130.2, 129.8, 129.3, 128.9, 128.3, 128.2, 128.1, 127.7, 127.1, 125.6, 124.3, 52.3, 42.1. HRMS (ESI) calcd. for  $\text{C}_{32}\text{H}_{23}\text{O}_3$   $[\text{M}+\text{H}]^+$ : 455.1642, found: 455.1645.

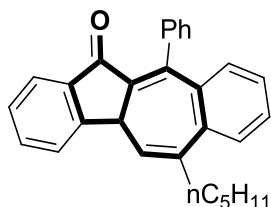

**6-pentyl-11-phenyldibenzo[a,f]azulen-12(4bH)-one (3ad):**

Yellow solid (31mg, 40% yield); mp 172-174 °C;  $R_f$  = 0.40 (PE/EA = 30:1).

$^1\text{H}$  NMR (400 MHz,  $\text{CDCl}_3$ )  $\delta$  7.76 (d,  $J$  = 7.6 Hz, 1H), 7.64 (ddd,  $J$  = 9.8, 8.4, 4.5 Hz, 2H), 7.55 (dd,  $J$  = 7.6, 0.7 Hz, 1H), 7.45 – 7.33 (m, 5H), 7.22 – 7.12 (m, 4H), 5.78 (d,  $J$  = 4.7 Hz, 1H), 3.80 (d,  $J$  = 4.2 Hz, 1H), 2.87 – 2.77 (m, 1H), 2.47 – 2.27 (m, 1H), 1.40 – 1.11 (m, 6H), 0.80 (t,  $J$  = 7.1 Hz, 3H).  $^{13}\text{C}$   $\{^1\text{H}\}$  NMR (100 MHz,  $\text{CDCl}_3$ )  $\delta$  190.5, 151.9, 145.1, 140.4, 140.1, 139.8, 139.4, 139.0, 138.6, 135.0, 133.3, 132.2, 130.0, 128.1, 128.0, 127.9, 127.1, 126.2, 125.5, 124.1, 41.5, 36.2, 31.3, 28.7, 22.5, 14.1. HRMS (ESI) calcd. for  $\text{C}_{29}\text{H}_{27}\text{O}$   $[\text{M}+\text{H}]^+$ : 391.2056, found: 391.2054.

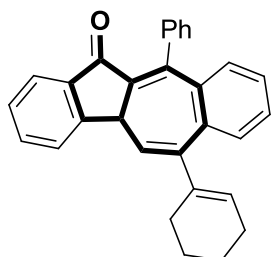

**6-(cyclohex-1-en-1-yl)-11-phenyldibenzo[a,f]azulen-12(4bH)-one (3ae):**

Yellow solid (46mg, 58% yield); mp 192-194 °C;  $R_f$  = 0.40 (PE/EA = 30:1).

$^1\text{H}$  NMR (400 MHz,  $\text{CDCl}_3$ )  $\delta$  7.75 (d,  $J$  = 7.6 Hz, 1H), 7.65 – 7.55 (m, 3H), 7.44 – 7.36 (m, 4H), 7.35 – 7.28 (m, 1H), 7.26 – 7.20 (m, 2H), 7.15 (dtd,  $J$  = 9.4, 8.0, 1.4 Hz, 2H), 5.86 (d,  $J$  = 5.0 Hz, 1H), 5.81 (s, 1H), 3.83 (d,  $J$  = 5.0 Hz, 1H), 2.12 (dd,  $J$  = 13.9, 5.1 Hz, 3H), 1.89 (d,  $J$  = 18.4 Hz, 1H), 1.62 (ddd,  $J$  = 20.8, 14.5, 8.5 Hz, 5H).  $^{13}\text{C}$   $\{^1\text{H}\}$  NMR (100 MHz,  $\text{CDCl}_3$ )  $\delta$  190.5, 151.9, 145.2, 143.0, 140.9, 140.1, 139.2, 138.8, 138.7, 138.5, 134.9, 131.7, 131.5, 130.2, 130.0, 128.1, 128.0, 127.9, 127.3, 126.3, 125.6, 124.1, 41.7, 28.3, 25.9, 23.1, 22.3. HRMS (ESI) calcd. for  $\text{C}_{30}\text{H}_{25}\text{O}$   $[\text{M}+\text{H}]^+$ : 401.1900, found: 401.1896.

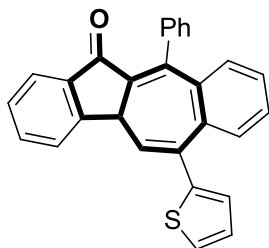

**11-phenyl-6-(thiophen-2-yl)dibenzo[a,f]azulen-12(4bH)-one(3af):**

Yellow solid (35mg, 44% yield); mp 202-204 °C;  $R_f = 0.30$  (PE/EA = 30:1).

$^1\text{H NMR}$  (400 MHz,  $\text{CDCl}_3$ )  $\delta$  7.76 (d,  $J = 7.6$  Hz, 1H), 7.70 – 7.60 (m, 2H), 7.56 – 7.51 (m, 1H), 7.46 – 7.39 (m, 4H), 7.33 – 7.19 (m, 6H), 7.16 (dd,  $J = 3.0, 1.2$  Hz, 1H), 7.00 (dd,  $J = 5.0, 1.3$  Hz, 1H), 6.16 (d,  $J = 5.1$  Hz, 1H), 3.93 (t,  $J = 12.2$  Hz, 1H).  $^{13}\text{C}$  { $^1\text{H}$ } NMR (100 MHz,  $\text{CDCl}_3$ )  $\delta$  190.2, 151.5, 145.3, 143.2, 140.7, 140.1, 139.3, 139.1, 138.3, 135.4, 135.1, 133.7, 131.7, 130.3, 130.2, 128.3, 128.2, 128.1, 128.0, 127.6, 126.9, 125.6, 125.5, 124.2, 123.0, 41.9. HRMS (ESI) calcd. for  $\text{C}_{28}\text{H}_{19}\text{OS}$   $[\text{M}+\text{H}]^+$ : 403.1151, found: 403.1148.

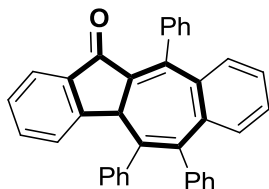

**5,6,11-triphenyldibenzo[a,f]azulen-12(4bH)-one (3ag):**

Yellow solid (73mg, 77% yield); mp 228-230 °C;  $R_f = 0.30$  (PE/EA = 30:1).

$^1\text{H NMR}$  (400 MHz,  $\text{CDCl}_3$ )  $\delta$  7.56 (d,  $J = 7.6$  Hz, 1H), 7.51 – 7.43 (m, 3H), 7.40 – 7.30 (m, 5H), 7.28 – 7.21 (m, 2H), 7.21 – 7.12 (m, 2H), 7.11 – 6.94 (m, 6H), 6.79 (s, 4H), 4.16 (s, 1H).  $^{13}\text{C}$  { $^1\text{H}$ } NMR (100 MHz,  $\text{CDCl}_3$ )  $\delta$  190.2, 149.7, 145.0, 143.8, 142.3, 141.1, 141.0, 140.4, 139.5, 138.8, 138.5, 137.0, 133.5, 131.3, 130.9, 130.3, 128.3, 128.2, 127.8, 127.7, 127.6, 127.1, 126.4, 126.3, 126.3, 123.8, 47.1. HRMS (ESI) calcd. for  $\text{C}_{36}\text{H}_{25}\text{O}$   $[\text{M}+\text{H}]^+$ : 473.1900, found: 473.1895.

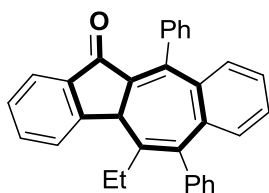

**5-ethyl-6,11-diphenyldibenzo[a,f]azulen-12(4bH)-one (3ah):**

Yellow solid (57mg, 68% yield); mp 148-150 °C;  $R_f = 0.30$  (PE/EA = 30:1).

$^1\text{H NMR}$  (400 MHz,  $\text{CDCl}_3$ )  $\delta$  7.82 (d,  $J = 7.7$  Hz, 1H), 7.65 – 7.59 (m, 2H), 7.45 (m, 4H), 7.36 (t,  $J = 7.6$  Hz, 2H), 7.33 – 7.27 (m, 3H), 7.23 – 7.12 (m, 5H), 7.08 (ddd,  $J = 8.3, 6.5, 1.6$  Hz, 1H), 3.92 (s, 1H), 2.06 (dq,  $J = 15.1, 7.5$  Hz, 1H), 1.86 (dq,  $J = 14.5, 7.3$  Hz, 1H), 0.46 (t,  $J = 7.4$  Hz, 3H).  $^{13}\text{C}$  { $^1\text{H}$ } NMR (100 MHz,  $\text{CDCl}_3$ )  $\delta$  190.1, 149.5, 145.0, 143.9, 142.8, 141.7, 141.6, 139.8, 139.6, 138.8, 135.6, 133.9, 131.0, 130.9, 130.3, 130.0, 128.4, 128.3, 128.2, 128.1, 127.7, 127.6, 126.8, 125.7, 124.3, 46.1, 24.7, 15.7. HRMS (ESI) calcd. for  $\text{C}_{32}\text{H}_{25}\text{O}$   $[\text{M}+\text{H}]^+$ : 425.1900, found: 425.1897.

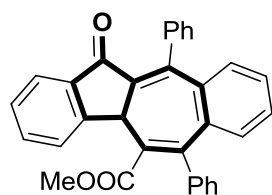

**methyl 12-oxo-6,11-diphenyl-4b,12-dihydrodibenzo[a,f]azulene-5-carboxylate (3ai):**

Yellow solid (41mg, 45% yield); mp 124-126 °C;  $R_f = 0.30$  (PE/EA = 30:1).

$^1\text{H NMR}$  (400 MHz,  $\text{CDCl}_3$ )  $\delta$  7.78 (d,  $J = 7.6$  Hz, 1H), 7.67 – 7.57 (m, 2H), 7.46 (dd,  $J = 5.2, 1.9$  Hz, 3H), 7.31 (m, 5H), 7.28 – 7.19 (m, 8H), 4.10 (s, 1H), 2.93 (s, 3H).

$^{13}\text{C}$   $\{^1\text{H}\}$  NMR (100 MHz,  $\text{CDCl}_3$ )  $\delta$  189.6, 166.9, 147.7, 141.0, 140.5, 140.4, 139.6, 138.7, 134.1, 131.5, 131.4, 130.2, 130.1, 128.6, 128.4, 128.2, 128.1, 128.0, 127.9, 127.7, 127.3, 124.0, 51.4, 43.3. HRMS (ESI) calcd. for  $\text{C}_{32}\text{H}_{23}\text{O}_3$   $[\text{M}+\text{H}]^+$ : 455.1642, found: 455.1644.

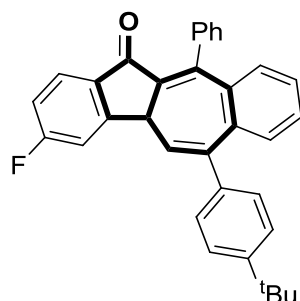

**6-(4-(tert-butyl)phenyl)-3-fluoro-11-phenyldibenzo[a,f]azulen-12(4bH)-one (3aj):**

Yellow solid (39mg, 42% yield); mp 182-184 °C;  $R_f = 0.40$  (PE/EA = 30:1).

$^1\text{H NMR}$  (400 MHz, acetone)  $\delta$  7.74 (dd,  $J = 8.4, 5.4$  Hz, 1H), 7.60 (dd,  $J = 8.7, 2.3$  Hz, 1H), 7.43 – 7.25 (m, 13H), 7.16 (d,  $J = 7.9$  Hz, 1H), 6.14 (d,  $J = 5.0$  Hz, 1H), 3.93 (d,  $J = 5.0$  Hz, 1H), 1.31 (s, 9H).  $^{13}\text{C}$   $\{^1\text{H}\}$  NMR (100 MHz, acetone)  $\delta$  188.2, 167.9 (d,  $J = 253.2$  Hz), 155.2 (d,  $J = 10.1$  Hz), 151.3, 145.4, 141.9, 141.5, 140.4, 140.2, 140.0, 138.8, 137.2 (d,  $J = 1.9$  Hz), 134.0, 132.2, 131.3, 131.1, 129.3, 128.7, 128.6, 128.4, 127.6, 126.9, 126.8, 126.1, 116.9 (d,  $J = 23.9$  Hz), 113.6 (d,  $J = 22.9$  Hz), 42.6 (d,  $J = 2.1$  Hz), 35.1, 31.9. HRMS (ESI) calcd. for  $\text{C}_{34}\text{H}_{28}\text{FO}$   $[\text{M}+\text{H}]^+$ : 471.2119, found: 471.2113.

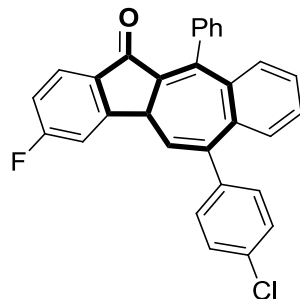

**6-(4-chlorophenyl)-3-fluoro-11-phenyldibenzo[a,f]azulen-12(4bH)-one (3ak):**

Yellow solid (57mg, 64% yield); mp 118-120 °C;  $R_f = 0.40$  (PE/EA = 30:1).

$^1\text{H NMR}$  (400 MHz, acetone)  $\delta$  7.74 (dd,  $J = 8.4, 5.4$  Hz, 1H), 7.60 (dd,  $J = 8.8, 2.2$  Hz, 1H), 7.44 – 7.34 (m, 8H), 7.34 – 7.25 (m, 5H), 7.18 – 7.12 (m, 1H), 6.19 (d,  $J =$

5.0 Hz, 1H), 3.94 (d,  $J = 5.0$  Hz, 1H).  $^{13}\text{C}$   $\{^1\text{H}\}$  NMR (100 MHz, acetone)  $\delta$  188.2, 167.9 (d,  $J = 253.3$  Hz), 155.0 (d,  $J = 10.0$  Hz), 145.5, 141.9 (d,  $J = 10.3$  Hz), 140.4, 140.0, 139.8, 138.7, 137.2 (d,  $J = 1.7$  Hz), 135.2, 133.9, 132.4, 131.3, 131.2 (d,  $J = 4.3$  Hz), 129.3, 128.8, 128.6, 128.5, 127.8, 126.9, 126.8, 117.0 (d,  $J = 23.9$  Hz), 113.7 (d,  $J = 22.9$  Hz), 42.6 (d,  $J = 2.1$  Hz). HRMS (ESI) calcd. for  $\text{C}_{30}\text{H}_{19}\text{ClFO}$   $[\text{M}+\text{H}]^+$ : 449.1103, found: 449.1106.

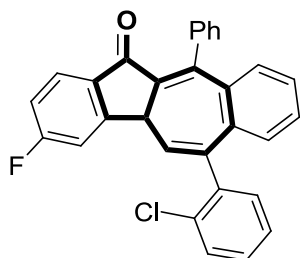

**6-(2-chlorophenyl)-3-fluoro-11-phenyldibenzo[a,f]azulen-12(4bH)-one (3al):**

Yellow solid (55mg, 62% yield); mp 124-126 °C;  $R_f = 0.40$  (PE/EA = 30:1).

$^1\text{H}$  NMR (400 MHz, acetone)  $\delta$  7.75 (dd,  $J = 8.4, 5.4$  Hz, 1H), 7.68 (d,  $J = 6.8$  Hz, 1H), 7.58 (m, 1H), 7.48 – 7.37 (m, 6H), 7.34 – 7.19 (m, 5H), 7.19 – 7.06 (m, 2H), 6.08 (d,  $J = 4.7$  Hz, 1H), 4.04 (d,  $J = 4.7$  Hz, 1H).  $^{13}\text{C}$   $\{^1\text{H}\}$  NMR (100 MHz, acetone)  $\delta$  188.2, 167.9 (d,  $J = 253.3$  Hz), 154.8 (d,  $J = 10.1$  Hz), 146.0, 141.5 (d,  $J = 7.5$  Hz), 140.4, 140.1, 138.2, 137.4, 137.2 (d,  $J = 2.0$  Hz), 134.0, 133.3, 132.8, 131.0, 130.6, 130.4, 129.4, 128.8, 128.7, 128.6, 128.1, 127.4, 126.9, 126.8, 117.0 (d,  $J = 23.9$  Hz), 113.5 (d,  $J = 22.9$  Hz), 42.4 (d,  $J = 2.1$  Hz). HRMS (ESI) calcd. for  $\text{C}_{30}\text{H}_{19}\text{ClFO}$   $[\text{M}+\text{H}]^+$ : 449.1103, found: 449.1119.

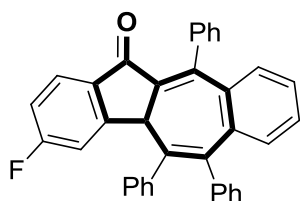

**3-fluoro-5,6,11-triphenyldibenzo[a,f]azulen-12(4bH)-one (3am):**

Yellow solid (64mg, 66% yield); mp 216-218 °C;  $R_f = 0.30$  (PE/EA = 30:1).

$^1\text{H}$  NMR (400 MHz, acetone)  $\delta$  7.53 – 7.50 (m, 1H), 7.45 (dd,  $J = 5.1, 1.9$  Hz, 3H), 7.42 – 7.23 (m, 7H), 7.22 – 7.17 (m, 1H), 7.07 (m, 8H), 6.84 (t,  $J = 7.1$  Hz, 2H), 4.16 (s, 1H).  $^{13}\text{C}$   $\{^1\text{H}\}$  NMR (100 MHz, acetone)  $\delta$  188.2, 166.7 (d,  $J = 252.2$  Hz), 153.4 (d,  $J = 10.4$  Hz), 145.2, 143.9, 143.1, 141.8, 141.1, 140.1, 139.7, 139.4, 138.2 (d,  $J = 1.9$  Hz), 137.7 131.9, 131.6, 131.4, 131.1, 128.8 (d,  $J = 1.1$  Hz), 128.5, 128.4, 127.8, 127.2 (d,  $J = 2.8$  Hz), 126.3, 126.2, 116.3 (dd,  $J = 23.5, 7.5$  Hz), 47.6 (d,  $J = 2.1$  Hz). HRMS (ESI) calcd. for  $\text{C}_{36}\text{H}_{24}\text{FO}$   $[\text{M}+\text{H}]^+$ : 491.1806, found: 491.1820.

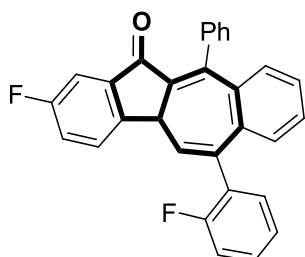

**2-fluoro-6-(2-fluorophenyl)-11-phenyldibenzo[a,f]azulen-12(4bH)-one (3an):**

Yellow solid (65mg, 76% yield); mp 132-134 °C;  $R_f = 0.40$  (PE/EA = 30:1).

$^1\text{H NMR}$  (400 MHz, acetone)  $\delta$  7.86 (dd,  $J = 8.4, 4.6$  Hz, 1H), 7.58 – 7.49 (m, 2H), 7.45 – 7.20 (m, 10H), 7.18 – 7.01 (m, 3H), 6.12 (d,  $J = 4.9$  Hz, 1H), 3.97 (d,  $J = 4.8$  Hz, 1H).  $^{13}\text{C}$  { $^1\text{H}$ } NMR (100 MHz, acetone)  $\delta$  188.8 (d,  $J = 3.1$  Hz), 163.7 (d,  $J = 246.5$  Hz), 160.8 (d,  $J = 246.8$  Hz), 147.7 (d,  $J = 2.2$  Hz), 146.3, 142.5 (d,  $J = 7.3$  Hz), 142.9, 140.9, 140.4 (d,  $J = 0.7$  Hz), 140.1, 138.8 (d,  $J = 1.1$  Hz), 136.2, 132.6 (d,  $J = 4.0$  Hz), 130.9, 130.8 (d,  $J = 8.3$  Hz), 130.7, 130.5, 129.6 (d,  $J = 0.9$  Hz), 128.9 (d,  $J = 8.2$  Hz), 128.8, 128.6, 127.5, 125.3 (d,  $J = 3.7$  Hz), 123.3, 123.1, 116.5 (d,  $J = 22.0$  Hz), 109.9 (d,  $J = 22.2$  Hz), 42.1. **HRMS (ESI)** calcd. for  $\text{C}_{30}\text{H}_{19}\text{F}_2\text{O}$   $[\text{M}+\text{H}]^+$ : 433.1398, found: 433.1395.

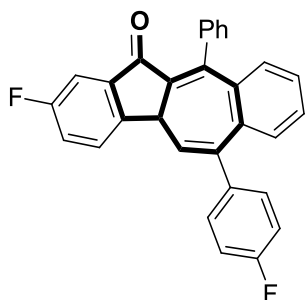

**2-fluoro-6-(4-fluorophenyl)-11-phenyldibenzo[a,f]azulen-12(4bH)-one (3ao):**

Yellow solid (48mg, 56% yield); mp 172-174 °C;  $R_f = 0.40$  (PE/EA = 30:1).

$^1\text{H NMR}$  (400 MHz, acetone)  $\delta$  7.88 (dd,  $J = 8.4, 4.6$  Hz, 1H), 7.55 (ddd,  $J = 9.1, 8.5, 2.6$  Hz, 1H), 7.44 – 7.25 (m, 11H), 7.15 (m, 4.8 Hz, 3H), 6.12 (d,  $J = 5.0$  Hz, 1H), 3.92 (d,  $J = 5.0$  Hz, 1H).  $^{13}\text{C}$  { $^1\text{H}$ } NMR (100 MHz, acetone)  $\delta$  188.9 (d,  $J = 3.0$  Hz), 163.5 (dd,  $J = 245.8, 45.9$  Hz), 147.9 (d,  $J = 2.2$  Hz), 146.1, 142.5 (d,  $J = 7.3$  Hz), 141.9, 140.5, 140.2, 140.0, 139.5 (d,  $J = 3.3$  Hz), 139.1, 135.3, 132.4, 131.7, 131.6, 131.2, 131.1, 129.1, 129.0, 128.8, 128.6 (d,  $J = 3.2$  Hz), 127.7, 123.3, 123.1, 115.9 (d,  $J = 21.6$  Hz), 109.9 (d,  $J = 22.2$  Hz), 42.2. **HRMS (ESI)** calcd. for  $\text{C}_{30}\text{H}_{19}\text{F}_2\text{O}$   $[\text{M}+\text{H}]^+$ : 433.1398, found: 433.1413.

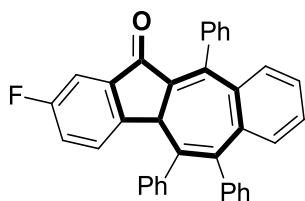

**2-fluoro-5,6,11-triphenyldibenzo[a,f]azulen-12(4bH)-one (3ap):**

Yellow solid (64mg, 65% yield); mp 228-230 °C;  $R_f = 0.30$  (PE/EA = 30:1).

$^1\text{H NMR}$  (400 MHz, acetone)  $\delta$  7.69 (dd,  $J = 8.4, 4.7$  Hz, 1H), 7.52 – 7.42 (m, 4H), 7.40 – 7.16 (m, 8H), 7.15 – 6.97 (m, 7H), 6.84 (m, 2H), 4.13 (s, 1H).  $^{13}\text{C}$  { $^1\text{H}$ } NMR (100 MHz, acetone)  $\delta$  188.8 (d,  $J = 3.0$  Hz), 163.1 (d,  $J = 246.5$  Hz), 146.3 (d,  $J = 2.2$  Hz), 145.6, 144.5, 143.5 (d,  $J = 7.3$  Hz), 143.2, 141.9, 141.1, 140.5, 139.7, 139.5, 137.6, 131.9, 131.8, 131.7, 131.6, 131.4, 131.0, 128.8 (d,  $J = 1.9$  Hz), 128.6, 128.4, 127.8, 127.2 (d,  $J = 1.2$  Hz), 127.1, 121.5 (d,  $J = 23.7$  Hz), 109.4 (d,  $J = 22.1$  Hz), 47.2. **HRMS (ESI)** calcd. for  $\text{C}_{36}\text{H}_{24}\text{FO}$   $[\text{M}+\text{H}]^+$ : 491.1806, found: 491.1799.

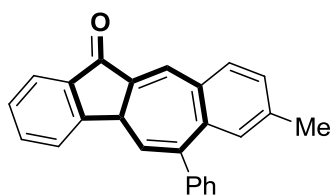

**8-methyl-6-phenyldibenzo[a,f]azulen-12(4bH)-one (4a):**

Yellow solid (31mg, 46% yield); mp 66-68 °C;  $R_f = 0.30$  (PE/EA = 30:1).

$^1\text{H NMR}$  (400 MHz,  $\text{CDCl}_3$ )  $\delta$  7.88 (d,  $J = 7.7$  Hz, 1H), 7.76 – 7.64 (m, 3H), 7.51 (d,  $J = 7.9$  Hz, 1H), 7.44 (dt,  $J = 11.6, 5.8$  Hz, 1H), 7.29 – 7.23 (m, 3H), 7.21 – 7.15 (m, 3H), 7.08 (s, 1H), 5.96 (d,  $J = 4.4$  Hz, 1H), 4.05 (d,  $J = 3.8$  Hz, 1H), 2.29 (s, 3H).  $^{13}\text{C}$  { $^1\text{H}$ } NMR (100 MHz,  $\text{CDCl}_3$ )  $\delta$  191.5, 152.4, 143.5, 141.9, 139.6, 138.0, 135.3, 133.5, 132.7, 132.6, 131.7, 131.2, 129.2, 128.6, 128.3, 128.2, 127.5, 125.8, 124.2, 40.7, 21.6. HRMS (ESI) calcd. for  $\text{C}_{25}\text{H}_{19}\text{O}$  [ $\text{M}+\text{H}$ ] $^+$ : 335.1430, found: 335.1429.

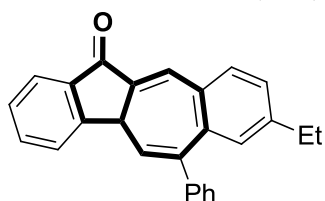

**8-ethyl-6-phenyldibenzo[a,f]azulen-12(4bH)-one (4b):**

Yellow solid (37mg, 53% yield); mp 60-62 °C;  $R_f = 0.30$  (PE/EA = 30:1).

$^1\text{H NMR}$  (400 MHz,  $\text{CDCl}_3$ )  $\delta$  7.88 (d,  $J = 7.7$  Hz, 1H), 7.75 (d,  $J = 1.7$  Hz, 1H), 7.73 – 7.62 (m, 2H), 7.54 (d,  $J = 8.0$  Hz, 1H), 7.47 – 7.41 (m, 1H), 7.30 – 7.15 (m, 6H), 7.10 (d,  $J = 1.4$  Hz, 1H), 5.97 (d,  $J = 4.4$  Hz, 1H), 4.07 (d,  $J = 3.7$  Hz, 1H), 2.58 (q,  $J = 7.6$  Hz, 2H), 1.15 (t,  $J = 7.6$  Hz, 3H).  $^{13}\text{C}$  { $^1\text{H}$ } NMR (100 MHz,  $\text{CDCl}_3$ )  $\delta$  191.5, 152.4, 144.2, 143.5, 141.9, 141.3, 139.6, 135.3, 133.7, 132.6, 131.8, 131.6, 131.3, 129.2, 128.2, 127.5, 127.3, 125.7, 124.2, 40.7, 28.9, 15.5. HRMS (ESI) calcd. for  $\text{C}_{26}\text{H}_{21}\text{O}$  [ $\text{M}+\text{H}$ ] $^+$ : 349.1587, found: 349.1583.

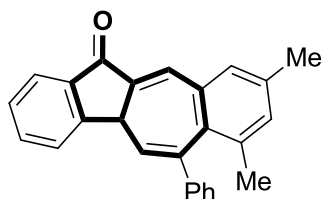

**7,9-dimethyl-6-phenyldibenzo[a,f]azulen-12(4bH)-one (4c):**

Yellow solid (36mg, 52% yield); mp 121-123 °C;  $R_f = 0.30$  (PE/EA = 30:1).

$^1\text{H NMR}$  (400 MHz,  $\text{CDCl}_3$ )  $\delta$  7.87 (d,  $J = 7.7$  Hz, 1H), 7.75 – 7.64 (m, 3H), 7.48 – 7.42 (m, 1H), 7.31 – 7.28 (m, 1H), 7.22 – 7.14 (m, 3H), 7.00 (dd,  $J = 7.9, 1.5$  Hz, 3H), 6.02 (d,  $J = 5.4$  Hz, 1H), 3.97 – 3.89 (m, 1H), 2.41 (s, 3H), 1.90 (s, 3H).  $^{13}\text{C}$  { $^1\text{H}$ } NMR (100 MHz,  $\text{CDCl}_3$ )  $\delta$  191.6, 152.3, 143.8, 143.3, 140.2, 139.3, 139.1, 137.1, 136.5, 136.1, 135.3, 134.0, 132.4, 131.7, 131.6, 129.0, 128.4, 128.3, 128.2, 127.1, 126.9, 126.0, 125.9, 124.3, 41.0, 22.6, 21.2. HRMS (ESI) calcd. for  $\text{C}_{26}\text{H}_{21}\text{O}$  [ $\text{M}+\text{H}$ ] $^+$ : 349.1587, found: 349.1586.



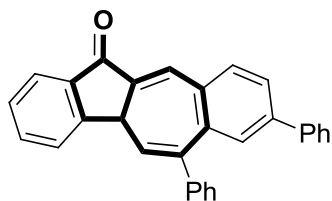

**6,8-diphenyldibenzo[a,f]azulen-12(4bH)-one (4d):**

Yellow solid (27mg, 34% yield); mp 99-101 °C;  $R_f = 0.30$  (PE/EA = 30:1).

$^1\text{H NMR}$  (400 MHz,  $\text{CDCl}_3$ )  $\delta$  7.81 (d,  $J = 7.7$  Hz, 1H), 7.71 (d,  $J = 1.6$  Hz, 1H), 7.66 – 7.56 (m, 3H), 7.52 (dd,  $J = 8.1, 1.9$  Hz, 1H), 7.42 (d,  $J = 1.7$  Hz, 1H), 7.38 (dd,  $J = 10.8, 3.8$  Hz, 3H), 7.28 (t,  $J = 7.4$  Hz, 2H), 7.25 – 7.10 (m, 6H), 5.93 (d,  $J = 4.4$  Hz, 1H), 4.04 (d,  $J = 3.6$  Hz, 1H).  $^{13}\text{C}$   $\{^1\text{H}\}$  NMR (100 MHz,  $\text{CDCl}_3$ )  $\delta$  191.4, 152.4, 143.3, 142.1, 141.9, 140.4, 140.2, 140.0, 139.0, 135.4, 135.1, 133.0, 132.3, 130.9, 130.8, 129.2, 128.9, 128.4, 128.3, 127.9, 127.6, 127.2, 126.2, 125.8, 124.3, 40.8. HRMS (ESI) calcd. for  $\text{C}_{30}\text{H}_{21}\text{O}$   $[\text{M}+\text{H}]^+$ : 397.1587, found: 397.1591.

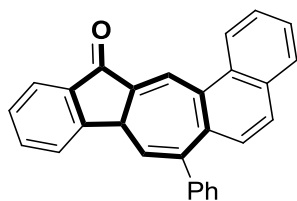

**7-phenylbenzo[a]naphtho[1,2-f]azulen-13(8aH)-one (4e):**

Yellow solid (29mg, 39% yield); mp 70-72 °C;  $R_f = 0.30$  (PE/EA = 30:1).

$^1\text{H NMR}$  (400 MHz,  $\text{CDCl}_3$ )  $\delta$  8.50 (d,  $J = 1.5$  Hz, 1H), 8.43 (d,  $J = 8.4$  Hz, 1H), 7.93 (d,  $J = 7.7$  Hz, 1H), 7.89 – 7.84 (m, 1H), 7.78 – 7.46 (m, 7H), 7.38 – 7.33 (m, 1H), 7.31 – 7.23 (m, 3H), 7.22 – 7.14 (m, 2H), 6.06 (d,  $J = 4.5$  Hz, 1H), 3.97 (d,  $J = 4.6$  Hz, 1H).  $^{13}\text{C}$   $\{^1\text{H}\}$  NMR (100 MHz,  $\text{CDCl}_3$ )  $\delta$  191.2, 152.3, 143.1, 142.1, 142.0, 139.2, 138.0, 135.5, 134.5, 132.9, 132.4, 132.3, 129.3, 129.2, 128.7, 128.4, 128.3, 128.0, 127.6, 127.4, 127.0, 125.9, 125.5, 124.9, 124.4, 40.9. HRMS (ESI) calcd. for  $\text{C}_{28}\text{H}_{19}\text{O}$   $[\text{M}+\text{H}]^+$ : 371.1430, found: 371.1426.

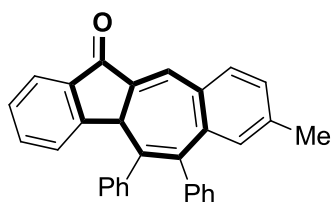

**8-methyl-5,6-diphenyldibenzo[a,f]azulen-12(4bH)-one (4f):**

Yellow solid (34mg, 41% yield); mp 90-92 °C;  $R_f = 0.30$  (PE/EA = 30:1).

$^1\text{H NMR}$  (400 MHz,  $\text{CDCl}_3$ )  $\delta$  7.85 (d,  $J = 1.5$  Hz, 1H), 7.72 (d,  $J = 7.6$  Hz, 1H), 7.55 (d,  $J = 7.9$  Hz, 1H), 7.32 – 7.10 (m, 6H), 7.08 – 6.96 (m, 3H), 6.95 – 6.90 (m, 2H), 6.80 (s, 4H), 4.14 (s, 1H), 2.28 (s, 3H).  $^{13}\text{C}$   $\{^1\text{H}\}$  NMR (100 MHz,  $\text{CDCl}_3$ )  $\delta$  191.3, 150.6, 143.2, 142.8, 142.7, 140.8, 139.8, 139.3, 138.1, 137.6, 133.7, 133.1, 132.8, 130.9, 130.7, 130.4, 128.8, 128.1, 127.6, 127.5, 127.1, 126.3, 126.1, 123.8, 45.3, 21.7. HRMS (ESI) calcd. for  $\text{C}_{31}\text{H}_{23}\text{O}$   $[\text{M}+\text{H}]^+$ : 411.1743, found: 411.1732.

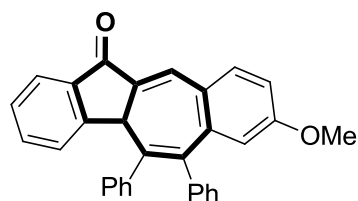

**8-methoxy-5,6-diphenyldibenzo[a,f]azulen-12(4bH)-one (4g):**

Yellow solid (30mg, 35% yield); mp 87-89 °C;  $R_f = 0.20$  (PE/EA = 30:1).

$^1\text{H NMR}$  (400 MHz,  $\text{CDCl}_3$ )  $\delta$  7.84 (d,  $J = 1.5$  Hz, 1H), 7.73 (d,  $J = 7.5$  Hz, 1H), 7.59 (d,  $J = 8.6$  Hz, 1H), 7.29 – 7.14 (m, 4H), 7.08 – 6.90 (m, 7H), 6.87 – 6.76 (m, 4H), 4.17 (s, 1H), 3.69 (s, 3H).  $^{13}\text{C}$   $\{^1\text{H}\}$  NMR (100 MHz,  $\text{CDCl}_3$ )  $\delta$  191.3, 159.0, 150.5, 142.8, 142.7, 139.3, 133.6, 132.8, 130.6, 130.4, 129.0, 128.7, 127.7, 127.6, 127.1, 126.4, 126.2, 123.7, 117.1, 113.9, 55.4, 45.3. HRMS (ESI) calcd. for  $\text{C}_{31}\text{H}_{23}\text{O}_2$   $[\text{M}+\text{H}]^+$ : 427.1693, found: 427.1690.

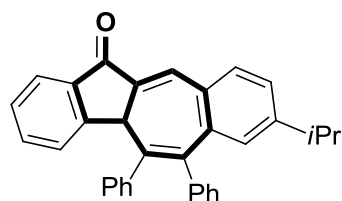

**8-isopropyl-5,6-diphenyldibenzo[a,f]azulen-12(4bH)-one (4h):**

Yellow solid (37mg, 42% yield); mp 98-100 °C;  $R_f = 0.30$  (PE/EA = 30:1).

$^1\text{H NMR}$  (400 MHz,  $\text{CDCl}_3$ )  $\delta$  7.86 (d,  $J = 1.6$  Hz, 1H), 7.73 (d,  $J = 7.6$  Hz, 1H), 7.59 (d,  $J = 8.1$  Hz, 1H), 7.31 – 7.17 (m, 5H), 7.15 (d,  $J = 1.6$  Hz, 1H), 7.07 – 6.90 (m, 6H), 6.80 (s, 4H), 4.17 (s, 1H), 2.82 (dt,  $J = 13.8, 6.9$  Hz, 1H), 1.16 (d,  $J = 6.9$  Hz, 3H), 1.12 (d,  $J = 6.9$  Hz, 3H).  $^{13}\text{C}$   $\{^1\text{H}\}$  NMR (100 MHz,  $\text{CDCl}_3$ )  $\delta$  191.4, 150.7, 148.8, 142.9, 142.8, 142.6, 141.0, 139.8, 139.4, 137.9, 133.7, 133.5, 131.1, 130.8, 130.7, 130.4, 128.8, 127.6, 127.4, 127.1, 126.3, 126.2, 125.3, 123.8, 45.3, 34.1, 23.8, 23.7. HRMS (ESI) calcd. for  $\text{C}_{33}\text{H}_{27}\text{O}$   $[\text{M}+\text{H}]^+$ : 439.2056, found: 439.2052.

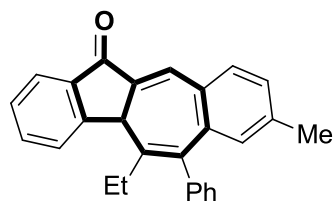

**5-ethyl-8-methyl-6-phenyldibenzo[a,f]azulen-12(4bH)-one (4i):**

Yellow solid (22mg, 30% yield); mp 74-76 °C;  $R_f = 0.30$  (PE/EA = 30:1).

$^1\text{H NMR}$  (400 MHz,  $\text{CDCl}_3$ )  $\delta$  7.93 (d,  $J = 7.6$  Hz, 1H), 7.73 (d,  $J = 1.5$  Hz, 1H), 7.67 – 7.64 (m, 2H), 7.53 – 7.43 (m, 2H), 7.35 – 7.22 (m, 4H), 7.07 (dd,  $J = 7.9, 1.2$  Hz, 2H), 6.95 (s, 1H), 3.86 (s, 1H), 2.23 (s, 3H), 2.18 – 1.98 (m, 2H), 0.31 (t,  $J = 7.4$  Hz, 3H).  $^{13}\text{C}$   $\{^1\text{H}\}$  NMR (100 MHz,  $\text{CDCl}_3$ )  $\delta$  191.1, 150.5, 143.6, 143.1, 143.0, 141.7, 140.5, 137.9, 135.9, 134.3, 132.9, 132.7, 131.0, 130.5, 130.3, 128.3, 128.2, 128.0, 127.5, 126.7, 124.4, 44.6, 25.2, 21.7, 15.4. HRMS (ESI) calcd. for  $\text{C}_{27}\text{H}_{23}\text{O}$   $[\text{M}+\text{H}]^+$ : 363.1743, found: 363.1740.

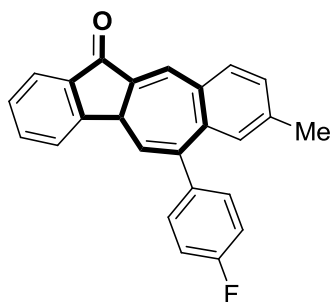

**6-(4-fluorophenyl)-8-methyldibenzo[a,f]azulen-12(4bH)-one (4j):**

Yellow solid (28mg, 40% yield); mp 77-79 °C;  $R_f = 0.30$  (PE/EA = 30:1).

$^1\text{H NMR}$  (400 MHz,  $\text{CDCl}_3$ )  $\delta$  7.81 (d,  $J = 7.6$  Hz, 1H), 7.69 – 7.57 (m, 3H), 7.47 – 7.34 (m, 2H), 7.13 (d,  $J = 7.8$  Hz, 1H), 7.09 – 7.02 (m, 2H), 6.97 (s, 1H), 6.89 (t,  $J = 8.7$  Hz, 2H), 5.85 (d,  $J = 4.4$  Hz, 1H), 3.97 (d,  $J = 3.9$  Hz, 1H), 2.23 (s, 3H).  $^{13}\text{C}$   $\{^1\text{H}\}$  NMR (100 MHz,  $\text{CDCl}_3$ )  $\delta$  190.3, 161.3 (d,  $J = 246.6$  Hz), 151.2, 140.2, 139.7, 138.4 (d,  $J = 3.4$  Hz), 138.3, 137.9, 136.9, 134.2, 132.4, 131.5, 131.3, 130.6, 130.0, 129.7, 129.6, 127.5, 127.1, 124.6, 123.1, 114.0 (d,  $J = 21.4$  Hz), 39.5, 20.5. HRMS (ESI) calcd. for  $\text{C}_{25}\text{H}_{18}\text{FO}$   $[\text{M}+\text{H}]^+$ : 353.1336, found: 353.1338.

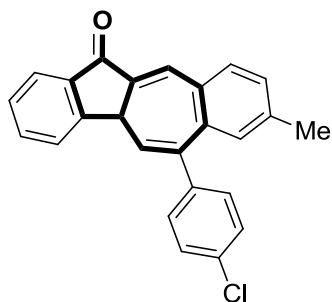

**6-(4-chlorophenyl)-8-methyldibenzo[a,f]azulen-12(4bH)-one (4k):**

Yellow solid (27mg, 37% yield); mp 75-75 °C;  $R_f = 0.30$  (PE/EA = 30:1).

$^1\text{H NMR}$  (400 MHz,  $\text{CDCl}_3$ )  $\delta$  7.88 (dd,  $J = 7.2, 3.3$  Hz, 1H), 7.75 – 7.65 (m, 3H), 7.52 (d,  $J = 8.0$  Hz, 1H), 7.49 – 7.44 (m, 1H), 7.27 – 7.23 (m, 2H), 7.21 (dd,  $J = 7.9, 1.0$  Hz, 1H), 7.14 – 7.08 (m, 2H), 7.02 (d,  $J = 8.6$  Hz, 1H), 5.95 (d,  $J = 4.4$  Hz, 1H), 4.04 (dd,  $J = 4.3, 1.4$  Hz, 1H), 2.31 (s, 3H).  $^{13}\text{C}$   $\{^1\text{H}\}$  NMR (100 MHz,  $\text{CDCl}_3$ )  $\delta$  191.2, 152.1, 141.8, 141.1, 140.6, 139.0, 138.9, 138.0, 135.2, 133.4, 133.3, 132.8, 132.2, 131.6, 131.0, 130.2, 128.6, 128.3, 128.2, 125.6, 124.1, 40.5, 21.4. HRMS (ESI) calcd. for  $\text{C}_{25}\text{H}_{18}\text{ClO}$   $[\text{M}+\text{H}]^+$ : 369.1041, found: 369.1038.

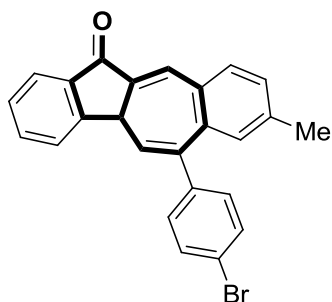

**6-(4-bromophenyl)-8-methyldibenzo[a,f]azulen-12(4bH)-one (4l):**

Yellow solid (35mg, 43% yield); mp 75-77 °C;  $R_f = 0.30$  (PE/EA = 30:1).

$^1\text{H}$  NMR (400 MHz,  $\text{CDCl}_3$ )  $\delta$  7.89 (d,  $J = 7.7$  Hz, 1H), 7.75 – 7.65 (m, 3H), 7.53 – 7.50 (m, 1H), 7.50 – 7.44 (m, 1H), 7.43 – 7.38 (m, 2H), 7.21 (dd,  $J = 7.9, 1.2$  Hz, 1H), 7.08 – 7.01 (m, 3H), 5.95 (d,  $J = 4.4$  Hz, 1H), 4.04 (dd,  $J = 4.4, 1.5$  Hz, 1H), 2.31 (s, 3H).  $^{13}\text{C}$   $\{^1\text{H}\}$  NMR (100 MHz,  $\text{CDCl}_3$ )  $\delta$  191.4, 152.2, 142.4, 140.8, 139.0, 138.2, 135.4, 133.6, 133.0, 132.4, 131.8, 131.4, 131.2, 130.8, 128.8, 128.3, 125.7, 124.3, 121.6, 40.7, 21.6. HRMS (ESI) calcd. for  $\text{C}_{25}\text{H}_{18}\text{BrO}$   $[\text{M}+\text{H}]^+$ : 413.0536, found: 413.0533

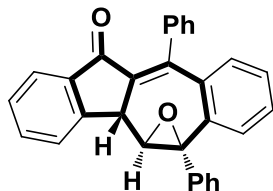

**1a,6-diphenyl-11b,11c-dihydrodibenzo[2,3:6,7]azuleno[4,5-b]oxiren-7(1aH)-one (5a):**

Yellow solid (67mg, 81% yield); mp 98-100°C;  $R_f = 0.30$  (PE/EA = 20:1).

$^1\text{H}$  NMR (400 MHz,  $\text{CDCl}_3$ )  $\delta$  7.73 (m, 2H), 7.65 (m, 2H), 7.50 – 7.41 (m, 4H), 7.39 – 7.32 (m, 3H), 7.32 – 7.20 (m, 4H), 7.17 – 7.11 (m, 2H), 7.05 – 6.99 (m, 1H), 3.90 (d,  $J = 6.2$  Hz, 1H), 3.42 (dd,  $J = 6.1, 3.4$  Hz, 1H).  $^{13}\text{C}$   $\{^1\text{H}\}$  NMR (100 MHz,  $\text{CDCl}_3$ )  $\delta$  191.1, 149.3, 148.5, 140.6, 139.8, 138.6, 138.4, 137.3, 135.2, 132.0, 131.6, 129.7, 129.6, 128.7, 128.6, 128.5, 128.4, 128.2, 127.9, 125.9, 124.6, 72.2, 60.8, 47.4. HRMS (ESI) calcd. for  $\text{C}_{30}\text{H}_{21}\text{O}_2$   $[\text{M}+\text{H}]^+$ : 413.1536, found: 413.1542.

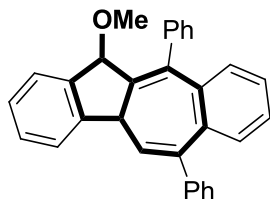

**12-methoxy-6,11-diphenyl-4b,12-dihydrodibenzo[a,f]azulene (6a):**

Yellow solid (31mg, 38% yield); mp 108-110 °C;  $R_f = 0.4$  (PE/EA = 20:1).

$^1\text{H}$  NMR (400 MHz,  $\text{CDCl}_3$ )  $\delta$  7.47 – 7.38 (m, 5H), 7.37 – 7.25 (m, 10H), 7.20 – 7.13 (m, 3H), 6.08 (d,  $J = 5.1$  Hz, 1H), 5.98 (s, 1H), 3.74 (d,  $J = 5.1$  Hz, 1H), 2.73 (s, 3H).  $^{13}\text{C}$   $\{^1\text{H}\}$  NMR (100 MHz,  $\text{CDCl}_3$ )  $\delta$  145.5, 143.9, 143.1, 141.8, 141.7, 141.6, 139.6, 139.0, 137.9, 134.7, 130.8, 129.8, 129.7, 129.4, 129.2, 128.5, 128.3, 127.8, 127.3, 127.2, 126.3, 125.7, 125.6, 124.7, 81.8, 52.7, 46.0, 29.9. HRMS (ESI) calcd. for  $\text{C}_{31}\text{H}_{25}\text{O}$   $[\text{M}+\text{H}]^+$ : 413.1900, found: 413.1905.

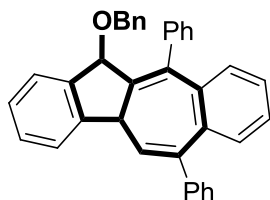

**12-(benzyloxy)-6,11-diphenyl-4b,12-dihydrodibenzo[a,f]azulene (7a):**

Yellow solid (44mg, 45% yield); mp 202-204 °C;  $R_f = 0.40$  (PE/EA = 30:1).

$^1\text{H}$  NMR (400 MHz,  $\text{CDCl}_3$ )  $\delta$  7.49 (d,  $J = 7.5$  Hz, 1H), 7.45 – 7.39 (m, 4H), 7.39 – 7.22 (m, 12H), 7.21 – 7.14 (m, 3H), 7.11 – 7.05 (m, 3H), 6.75 (dd,  $J = 7.3, 2.3$  Hz, 1H), 6.21 (s, 1H), 6.15 (d,  $J = 5.2$  Hz, 1H), 4.05 (d,  $J = 10.7$  Hz, 1H), 3.79 (dd,  $J = 7.9, 5.8$  Hz, 1H).  $^{13}\text{C}$   $\{^1\text{H}\}$  NMR (100 MHz,  $\text{CDCl}_3$ )  $\delta$  145.4, 144.4, 143.0, 142.0, 141.9,

141.8, 139.7, 139.1, 138.8, 137.8, 134.8, 130.7, 130.0, 129.8, 129.7, 129.2, 128.7, 128.3, 128.1, 128.1, 127.8, 127.3, 127.2, 126.3, 125.8, 124.8, 80.9, 67.4, 46.2. **HRMS (ESI)** calcd. for C<sub>37</sub>H<sub>29</sub>O [M+H]<sup>+</sup>: 489.2213, found: 489.2215.

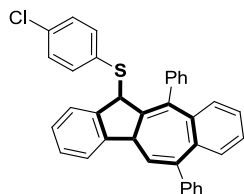

**6,11-diphenyl-4b,12-dihydrodibenzo[a,f]azulen-12-yl)sulfane (8a):**

Yellow solid (80mg, 77% yield); mp 156-158 °C; R<sub>f</sub> = 0.40 (PE/EA = 30:1).

**<sup>1</sup>H NMR (400 MHz, CDCl<sub>3</sub>)** δ 7.47 (t, *J* = 7.5 Hz, 3H), 7.42 – 7.26 (m, 10H), 7.20 (d, *J* = 7.5 Hz, 1H), 7.17 – 7.08 (m, 4H), 6.53 (d, *J* = 8.5 Hz, 2H), 6.38 (d, *J* = 8.5 Hz, 2H), 5.61 (s, 1H), 4.64 (d, *J* = 5.5 Hz, 1H), 3.52 (d, *J* = 5.5 Hz, 1H). **<sup>13</sup>C {<sup>1</sup>H} NMR (100 MHz, CDCl<sub>3</sub>)** δ 144.6, 144.5, 143.4, 142.9, 141.8, 141.7, 139.2, 138.8, 138.1, 137.7, 137.6, 136.1, 135.0, 133.1, 130.7, 130.1, 129.9, 129.4, 128.8, 128.7, 128.6, 128.5, 128.2, 128.1, 127.9, 127.7, 127.3, 127.2, 126.2, 125.6, 125.5, 124.5, 55.9, 46.5. **HRMS (ESI)** calcd. for C<sub>36</sub>H<sub>26</sub>ClS [M+H]<sup>+</sup>: 525.1438, found: 525.1445.

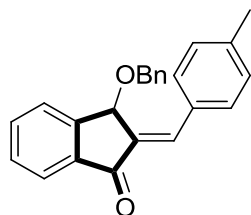

**(E)-3-(benzyloxy)-2-(4-methylbenzylidene)-2,3-dihydro-1H-inden-1-one (9a):**

Yellow solid (54 mg, 80% yield); mp 101-102 °C; R<sub>f</sub> = 0.50 (PE/EA = 10:1).

**<sup>1</sup>H NMR (400 MHz, CDCl<sub>3</sub>)** δ 7.96 – 7.92 (m, 3H), 7.89 (d, *J* = 1.6 Hz, 1H), 7.84 – 7.82 (m, 1H), 7.75 – 7.71 (m, 1H), 7.58 – 7.54 (m, 1H), 7.28 (d, *J* = 8.0 Hz, 2H), 7.22 – 7.20 (m, 3H), 7.06 – 7.04 (m, 2H), 6.18 (s, 1H), 4.15 (d, *J* = 10.3 Hz, 1H), 3.88 (d, *J* = 10.3 Hz, 1H), 2.42 (s, 3H). **<sup>13</sup>C {<sup>1</sup>H} NMR (100 MHz, CDCl<sub>3</sub>)** δ 192.5, 149.0, 141.4, 139.2, 138.9, 137.9, 135.3, 132.6, 132.4, 131.5, 130.0, 129.9, 128.4, 128.3, 127.8, 126.4, 123.9, 74.8, 65.3, 21.8. **HRMS (ESI)** calcd. for C<sub>24</sub>H<sub>21</sub>O<sub>2</sub> [M+H]<sup>+</sup>: 341.1536, found: 341.1545.

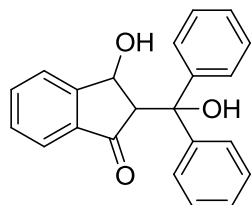

**3-hydroxy-2-(hydroxydiphenylmethyl)-2,3-dihydro-1H-inden-1-one (Int-2):**

yellow solid (7.3 mg, 11% yield); mp 138–140 °C; R<sub>f</sub> = 0.20 (PE/EA = 5:1).

**<sup>1</sup>H NMR (400 MHz, CDCl<sub>3</sub>)** δ 7.71 (d, *J* = 7.6 Hz, 1H), 7.69-7.64 (m, 1H), 7.64-7.60 (m, 1H), 7.50 -7.43 (m, 3H), 7.38-7.32 (m, 2H), 7.31-7.21 (m, 6H), 5.36 (t, *J* = 4.0 Hz, 1H), 4.05 (s, 1H), 3.62 (d, *J* = 4.2 Hz, 1H), 1.68 (d, *J* = 4.0 Hz, 1H). **<sup>13</sup>C {<sup>1</sup>H} NMR (100 MHz, CDCl<sub>3</sub>)** δ 202.9, 152.8, 145.5, 144.7, 136.3, 135.7, 129.5, 128.6, 128.5,

127.7, 127.6, 126.8, 126.7, 125.9, 123.3, 79.5, 71.6, 67.6. **HRMS (ESI)** calcd. for  $C_{22}H_{18}NaO_3$   $[M+Na]^+$ : 353.1148, found: 353.1133.

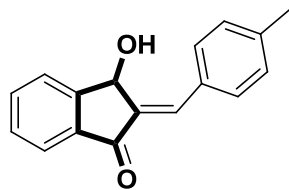

**3-hydroxy-2-(4-methylbenzylidene)-2,3-dihydro-1H-inden-1-one (Int-3):**

Yellow solid (19mg, 37% yield); mp 159-161 °C; R<sub>f</sub> = 0.30 (PE/EA = 5:1).

$^1H$  NMR (400 MHz,  $CDCl_3$ )  $\delta$  7.86 – 7.77 (m, 4H), 7.73 – 7.66 (m, 1H), 7.62 (d, J = 1.4 Hz, 1H), 7.51 – 7.45 (m, 1H), 7.31 – 7.24 (m, 2H), 5.93 – 5.91 (m, 1H), 2.41 (s, 3H).  $^{13}C$  {1H} NMR (100 MHz,  $CDCl_3$ )  $\delta$  192.7, 151.6, 141.3, 138.0, 137.3, 136.4, 135.4, 132.2, 131.2, 129.9, 129.8, 126.2, 123.9, 69.0, 21.8. **HRMS (ESI)** calcd. for  $C_{17}H_{15}O_2$   $[M+H]^+$ : 251.1067, found: 251.1065.

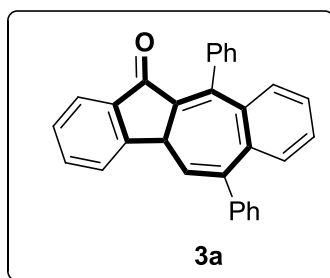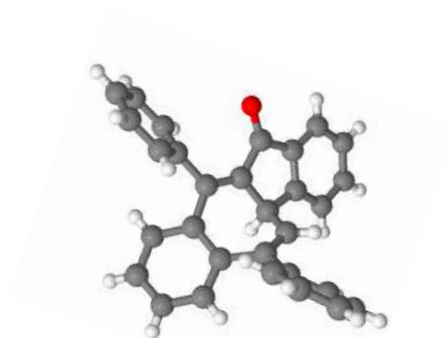

X-ray structure of **3a**

Thermal ellipsoids drawn at the 35% probability level  
CH<sub>2</sub>Cl<sub>2</sub> : PE = 1:2 as solvent system for crystal growth

## Datablock:

---

|                 |                                          |                    |
|-----------------|------------------------------------------|--------------------|
| Bond precision: | C-C = 0.0089 Å                           | Wavelength=0.71073 |
| Cell:           | a=26.580(7)    b=9.356(3)    c=20.482(5) |                    |
|                 | alpha=90    beta=125.071(4)    gamma=90  |                    |
| Temperature:    | 296 K                                    |                    |

  

|                | Calculated  | Reported    |
|----------------|-------------|-------------|
| Volume         | 4169(2)     | 4168.9(18)  |
| Space group    | C 2/c       | C2/c        |
| Hall group     | -C 2yc      | ?           |
| Moiety formula | C30 H20 O   | ?           |
| Sum formula    | C30 H20 O   | C30 H20 O   |
| Mr             | 396.46      | 396.46      |
| Dx,g cm-3      | 1.263       | 1.263       |
| Z              | 8           | 8           |
| Mu (mm-1)      | 0.075       | 0.075       |
| F000           | 1664.0      | 1664.0      |
| F000'          | 1664.67     |             |
| h,k,lmax       | 31,11,24    | 31,11,24    |
| Nref           | 3708        | 3703        |
| Tmin,Tmax      | 0.978,0.990 | 0.977,0.990 |
| Tmin'          | 0.977       |             |

Correction method= # Reported T Limits: Tmin=0.977 Tmax=0.990  
AbsCorr = NONE

|                               |                                 |
|-------------------------------|---------------------------------|
| Data completeness= 0.999      | Theta(max)= 25.100              |
| R(reflections)= 0.0776( 1437) | wR2(reflections)= 0.2496( 3703) |
| S = 0.998                     | Npar= 280                       |

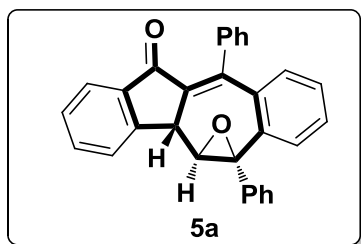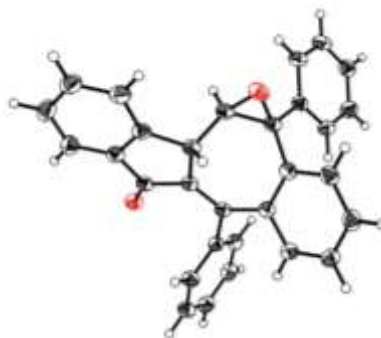

X-ray structure of **5a**

Thermal ellipsoids drawn at the 35% probability level  
 CH<sub>3</sub>OH: PE = 1:1 as solvent system for crystal growth

## Datablock:

|                        |                                              |                                 |
|------------------------|----------------------------------------------|---------------------------------|
| Bond precision:        | C-C = 0.0020 Å                               | Wavelength=1.54184              |
| Cell:                  | a=11.0409(4)    b=15.3931(4)    c=13.0070(7) |                                 |
|                        | alpha=90    beta=105.945(4)    gamma=90      |                                 |
| Temperature:           | 180 K                                        |                                 |
|                        | Calculated                                   | Reported                        |
| Volume                 | 2125.54(15)                                  | 2125.54(15)                     |
| Space group            | P 21/n                                       | P 21/n                          |
| Hall group             | -P 2yn                                       | -P 2yn                          |
| Moiety formula         | C30 H20 O2                                   | ?                               |
| Sum formula            | C30 H20 O2                                   | C30 H20 O2                      |
| Mr                     | 412.46                                       | 412.46                          |
| Dx, g cm <sup>-3</sup> | 1.289                                        | 1.289                           |
| Z                      | 4                                            | 4                               |
| Mu (mm <sup>-1</sup> ) | 0.624                                        | 0.624                           |
| F000                   | 864.0                                        | 864.0                           |
| F000'                  | 866.46                                       |                                 |
| h, k, lmax             | 13, 19, 16                                   | 13, 19, 16                      |
| Nref                   | 4460                                         | 4274                            |
| Tmin, Tmax             |                                              |                                 |
| Tmin'                  |                                              |                                 |
| Correction method=     | Not given                                    |                                 |
| Data completeness=     | 0.958                                        | Theta(max)= 76.528              |
| R(reflections)=        | 0.0444( 3720)                                | wR2(reflections)= 0.1257( 4274) |
| S =                    | 1.053                                        | Npar= 290                       |



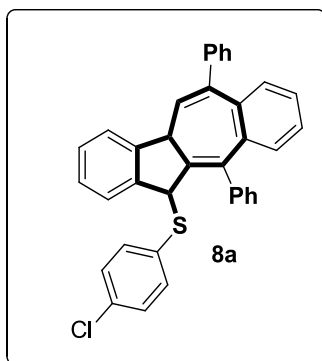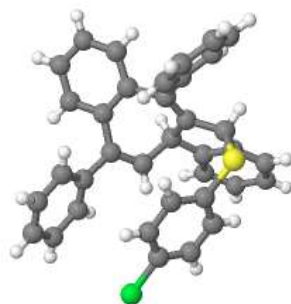

X-ray structure of **8a**

Thermal ellipsoids drawn at the 35% probability level  
 $\text{CH}_2\text{Cl}_2$  : PE = 1:2 as solvent system for crystal growth

## Datablock:

|                        |                                                |                                      |
|------------------------|------------------------------------------------|--------------------------------------|
| Bond precision:        | C-C = 0.0039 Å                                 | Wavelength=0.71073                   |
| Cell:                  | a=13.7240 (7)    b=11.3771 (7)    c=17.129 (1) |                                      |
|                        | alpha=90    beta=96.235 (5)    gamma=90        |                                      |
| Temperature:           | 293 K                                          |                                      |
|                        | Calculated                                     | Reported                             |
| Volume                 | 2658.7 (3)                                     | 2658.7 (3)                           |
| Space group            | P 21/c                                         | P 1 21/c 1                           |
| Hall group             | -P 2ybc                                        | -P 2ybc                              |
| Moiety formula         | C <sub>36</sub> H <sub>25</sub> Cl S           | C <sub>36</sub> H <sub>25</sub> Cl S |
| Sum formula            | C <sub>36</sub> H <sub>25</sub> Cl S           | C <sub>36</sub> H <sub>25</sub> Cl S |
| Mr                     | 525.07                                         | 525.07                               |
| Dx, g cm <sup>-3</sup> | 1.312                                          | 1.312                                |
| Z                      | 4                                              | 4                                    |
| Mu (mm <sup>-1</sup> ) | 0.247                                          | 0.247                                |
| F000                   | 1096.0                                         | 1096.0                               |
| F000'                  | 1097.45                                        |                                      |
| h, k, lmax             | 16, 14, 21                                     | 16, 14, 21                           |
| Nref                   | 5219                                           | 5208                                 |
| Tmin, Tmax             | 0.957, 0.966                                   | 0.892, 1.000                         |
| Tmin'                  | 0.949                                          |                                      |
| Correction method=     | # Reported T Limits: Tmin=0.892 Tmax=1.000     |                                      |
| AbsCorr =              | MULTI-SCAN                                     |                                      |
| Data completeness=     | 0.998                                          | Theta (max)= 26.022                  |
| R(reflections)=        | 0.0547 ( 3300)                                 | wR2(reflections)= 0.1326 ( 5208)     |
| S =                    | 1.056                                          | Npar= 343                            |

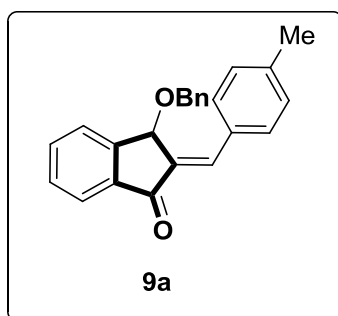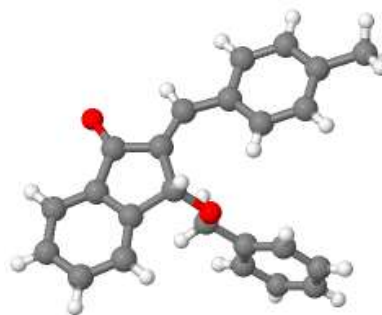

X-ray structure of **9a**

Thermal ellipsoids drawn at the 35% probability level  
 CH<sub>2</sub>Cl<sub>2</sub> : PE = 1:2 as solvent system for crystal growth

## Datablock:

|                        |                                                |                                                |
|------------------------|------------------------------------------------|------------------------------------------------|
| Bond precision:        | C-C = 0.0022 Å                                 | Wavelength=0.71073                             |
| Cell:                  | a=11.0194(5)    b=12.1077(6)    c=14.8611(7)   |                                                |
|                        | alpha=90    beta=111.464(1)    gamma=90        |                                                |
| Temperature:           | 293 K                                          |                                                |
|                        | Calculated                                     | Reported                                       |
| Volume                 | 1845.25(15)                                    | 1845.25(15)                                    |
| Space group            | P 21/n                                         | P 1 21/n 1                                     |
| Hall group             | -P 2yn                                         | -P 2yn                                         |
| Moiety formula         | C <sub>24</sub> H <sub>20</sub> O <sub>2</sub> | C <sub>24</sub> H <sub>20</sub> O <sub>2</sub> |
| Sum formula            | C <sub>24</sub> H <sub>20</sub> O <sub>2</sub> | C <sub>24</sub> H <sub>20</sub> O <sub>2</sub> |
| Mr                     | 340.40                                         | 340.40                                         |
| Dx, g cm <sup>-3</sup> | 1.225                                          | 1.225                                          |
| Z                      | 4                                              | 4                                              |
| Mu (mm <sup>-1</sup> ) | 0.077                                          | 0.077                                          |
| F000                   | 720.0                                          | 720.0                                          |
| F000'                  | 720.32                                         |                                                |
| h,k,lmax               | 14,15,19                                       | 14,15,19                                       |
| Nref                   | 4249                                           | 4230                                           |
| Tmin,Tmax              | 0.973,0.976                                    | 0.683,0.746                                    |
| Tmin'                  | 0.973                                          |                                                |
| Correction method=     | # Reported T Limits: Tmin=0.683 Tmax=0.746     |                                                |
| AbsCorr =              | MULTI-SCAN                                     |                                                |
| Data completeness=     | 0.996                                          | Theta(max)= 27.555                             |
| R(reflections)=        | 0.0498( 3229)                                  | wR2(reflections)= 0.1375( 4230)                |
| S =                    | 1.036                                          | Npar= 236                                      |

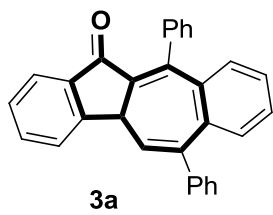

$^1\text{H NMR}$  (400 MHz,  $\text{CDCl}_3$ )

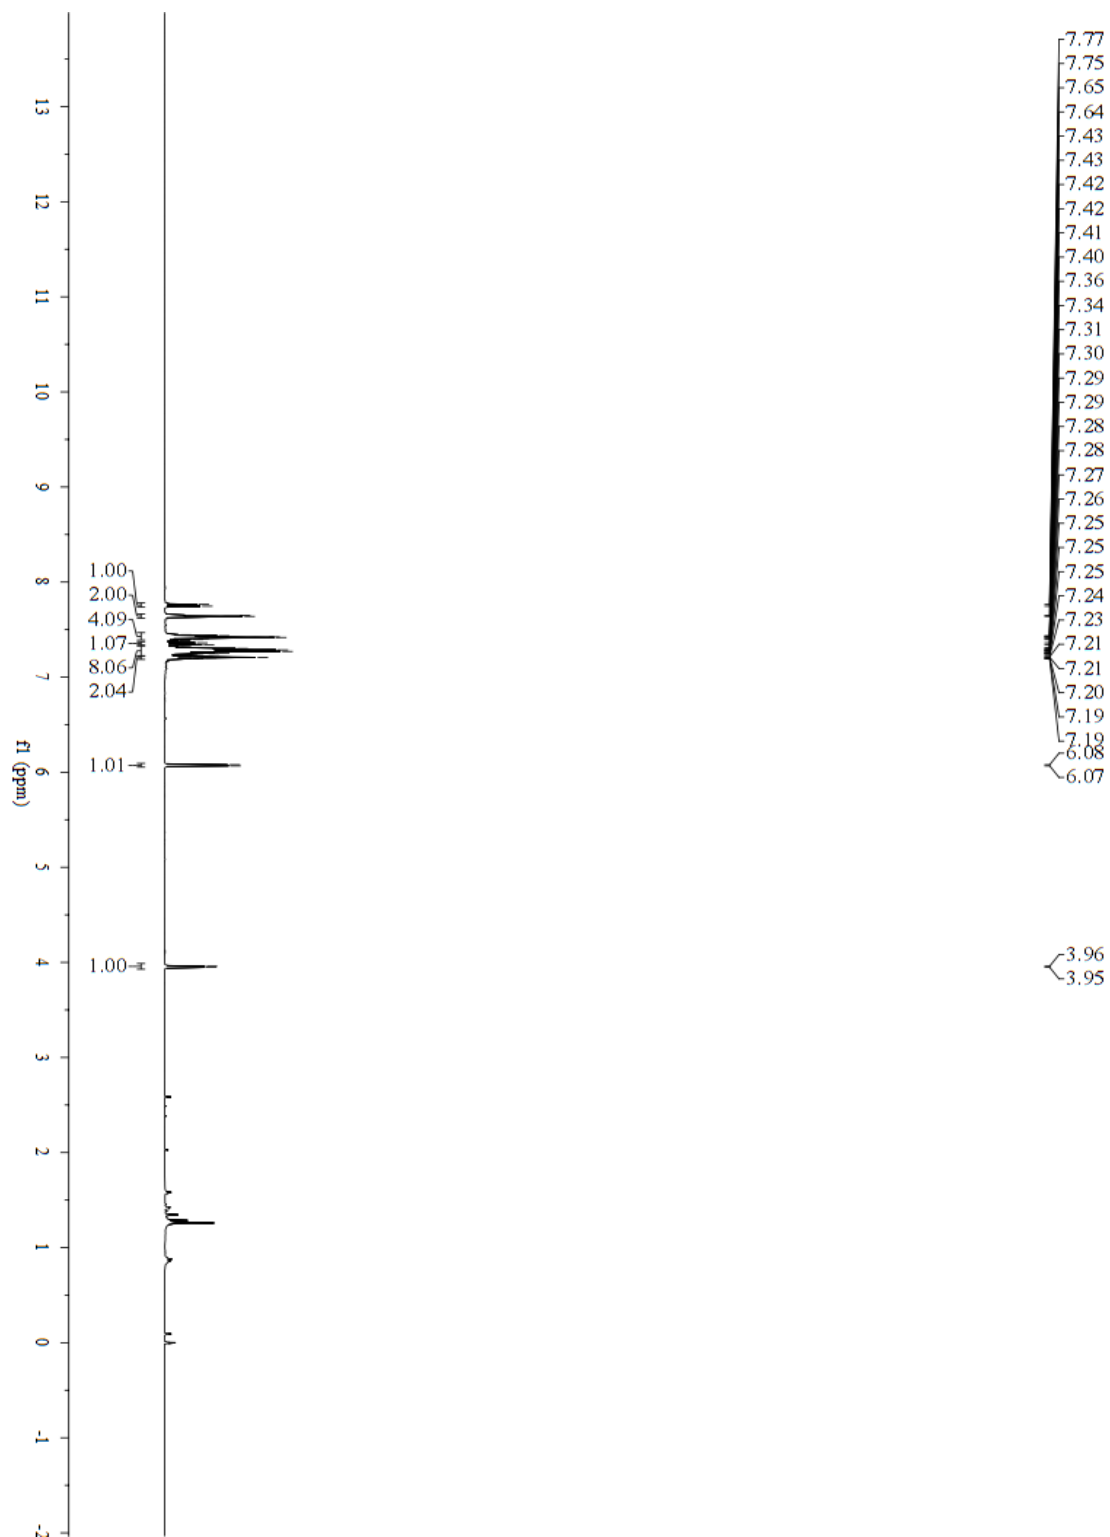

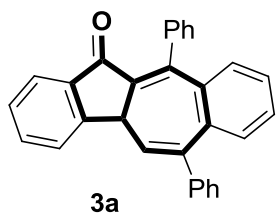

$^{13}\text{C}$  NMR (100 MHz,  $\text{CDCl}_3$ )

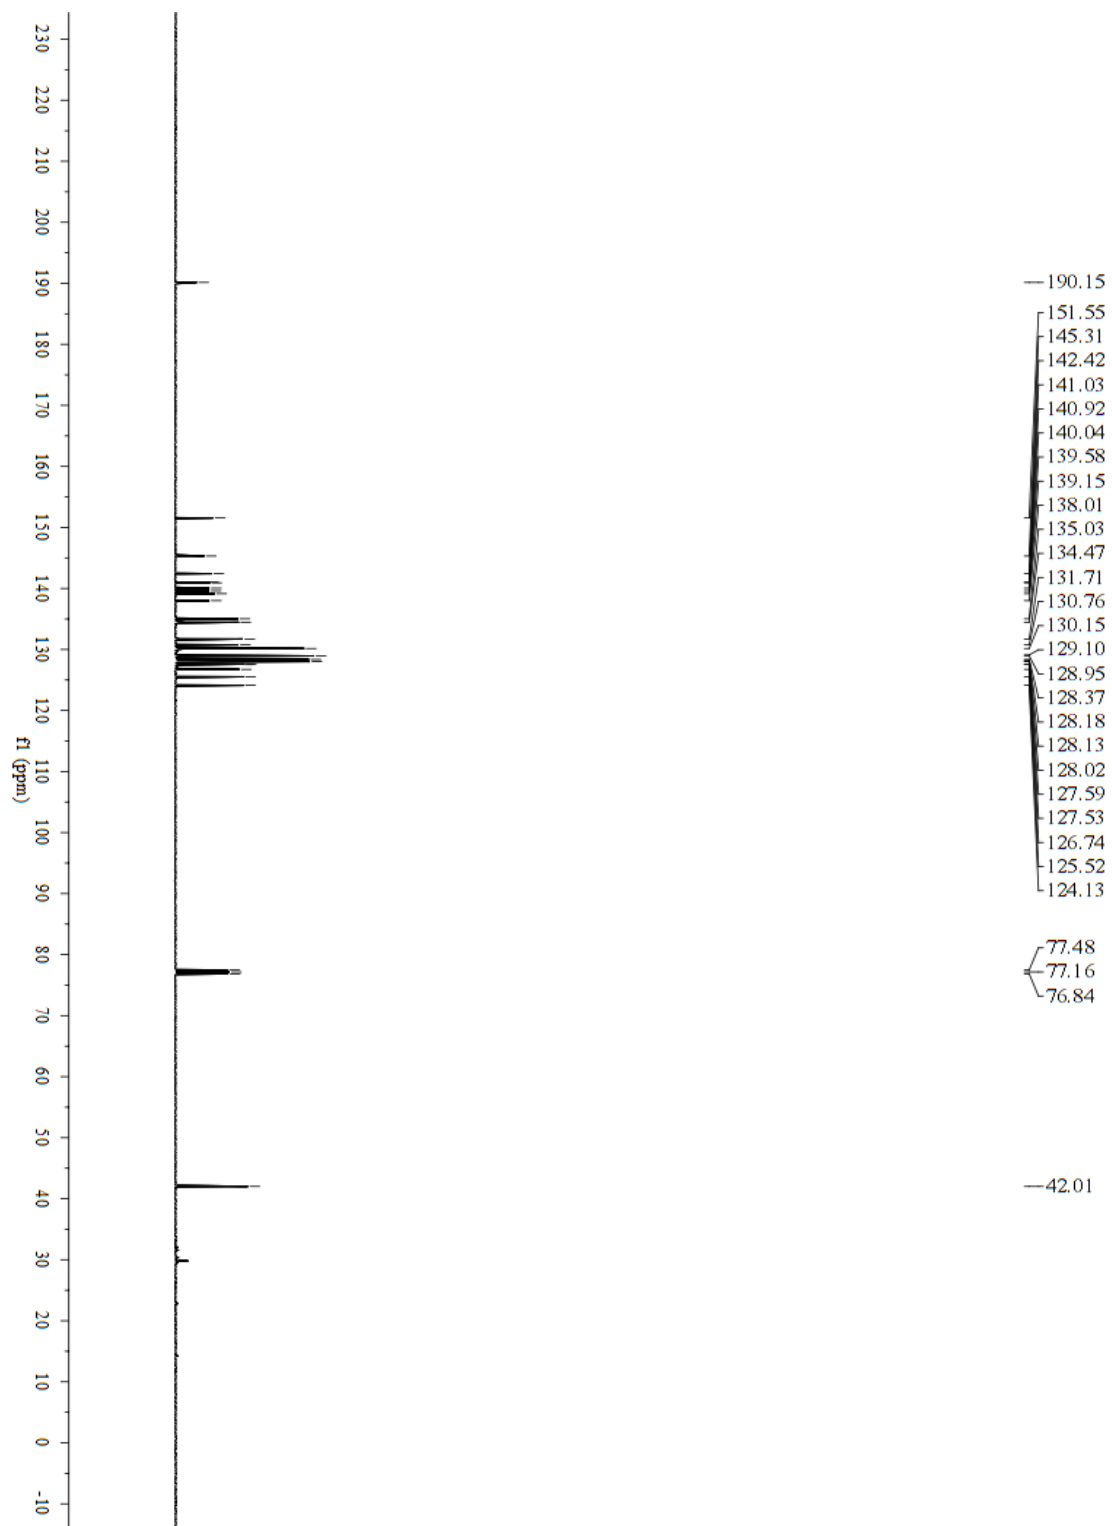

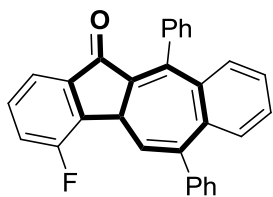

**3b**

$^1\text{H NMR}$  (400 MHz,  $\text{CDCl}_3$ )

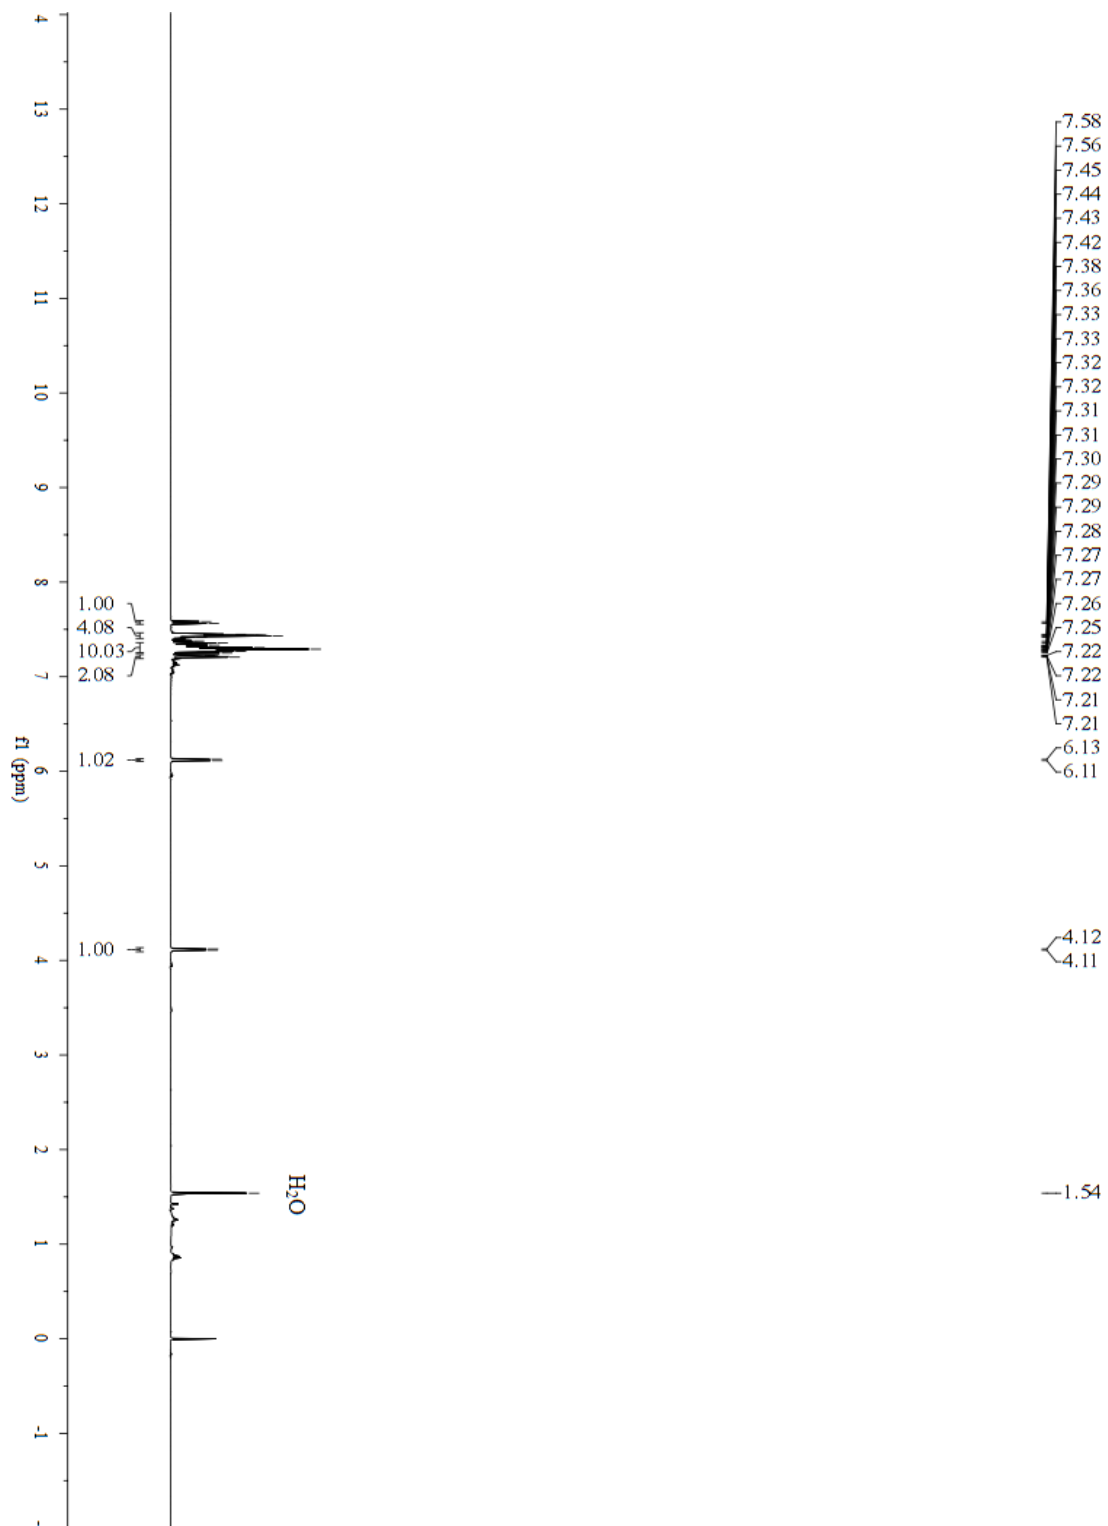

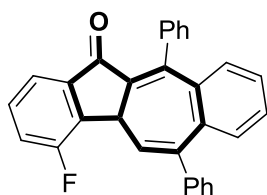

3b

$^{13}\text{C}$  NMR (100 MHz,  $\text{CDCl}_3$ )

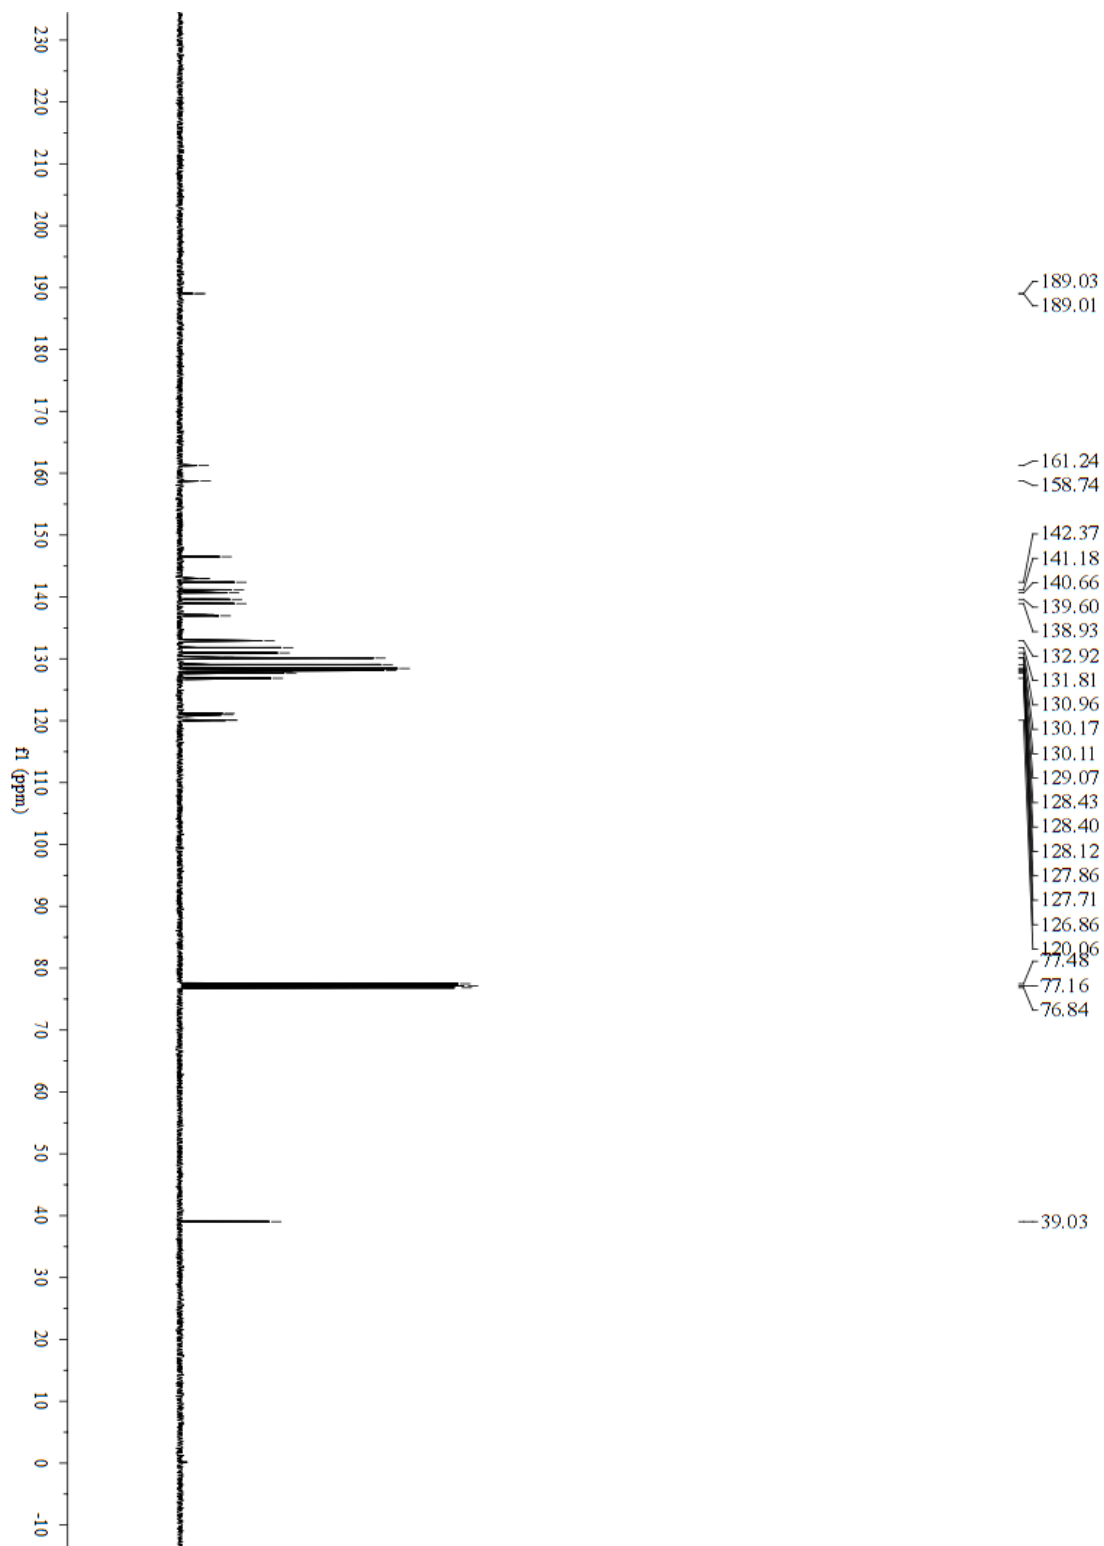

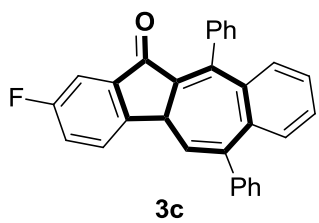

**<sup>1</sup>H NMR (400 MHz, acetone)**

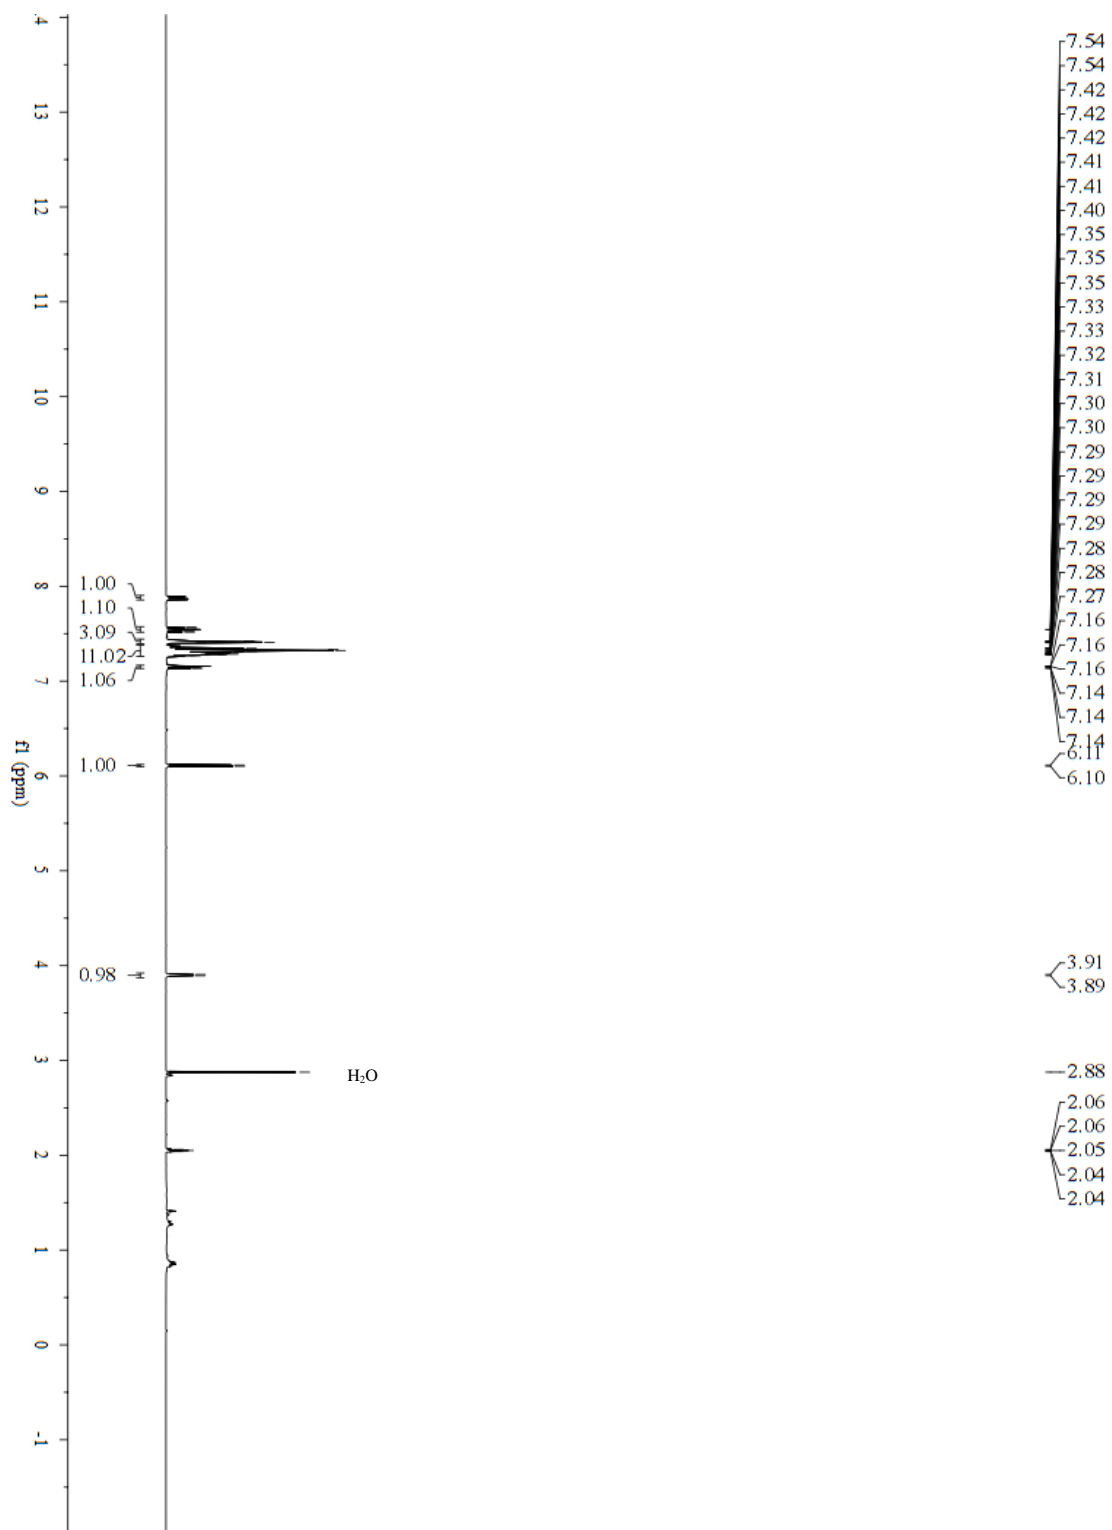

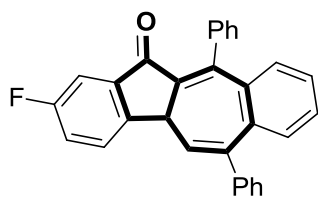

3c

$^{13}\text{C}$  NMR (100 MHz, acetone)

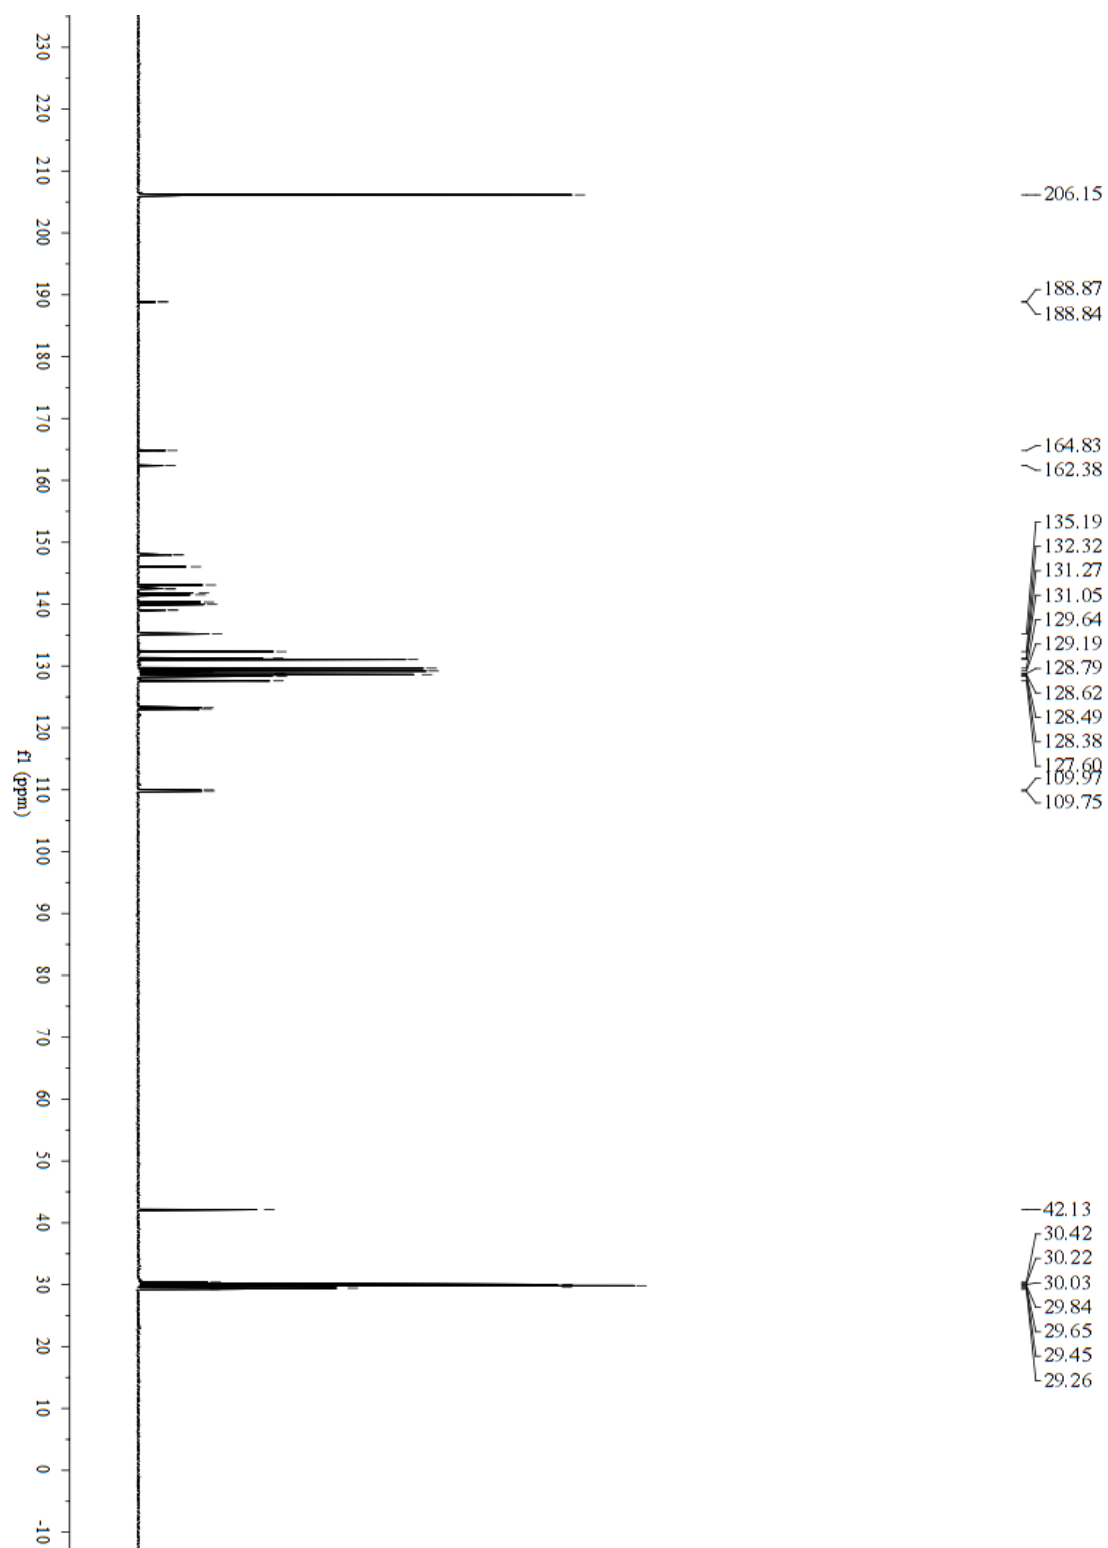



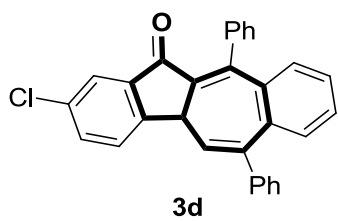

**<sup>1</sup>H NMR (400 MHz, CDCl<sub>3</sub>)**

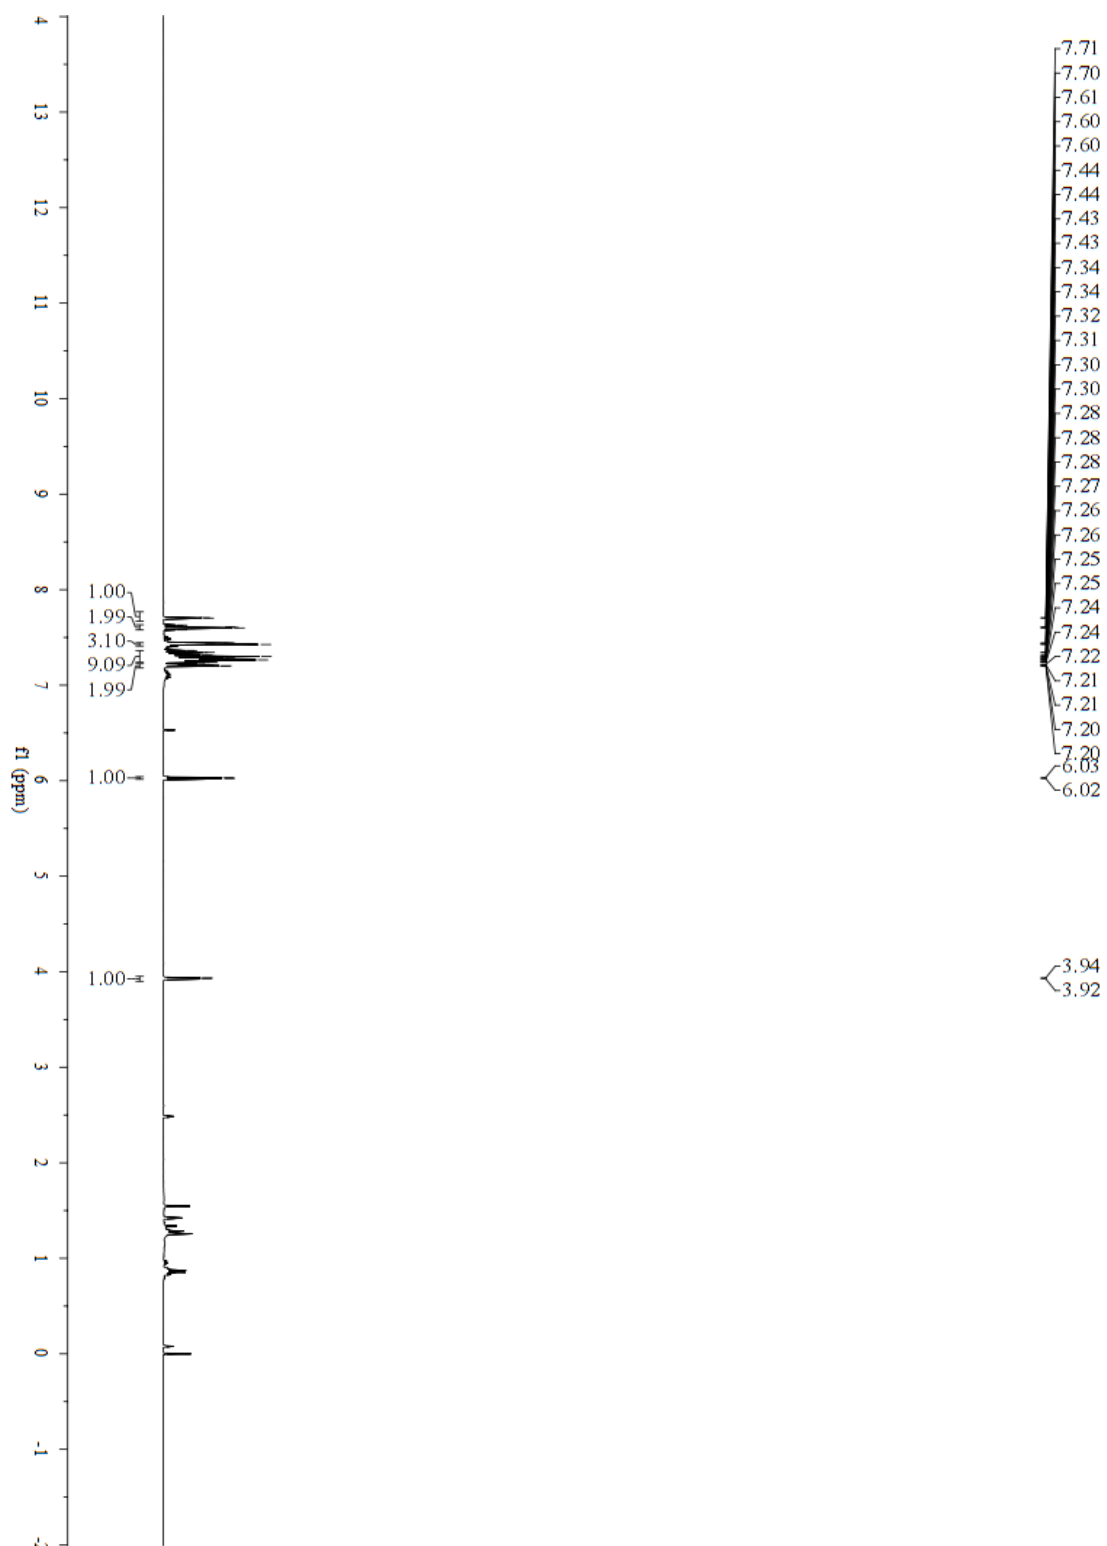

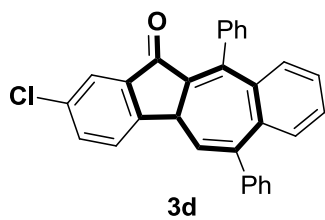

$^{13}\text{C}$  NMR (100 MHz,  $\text{CDCl}_3$ )

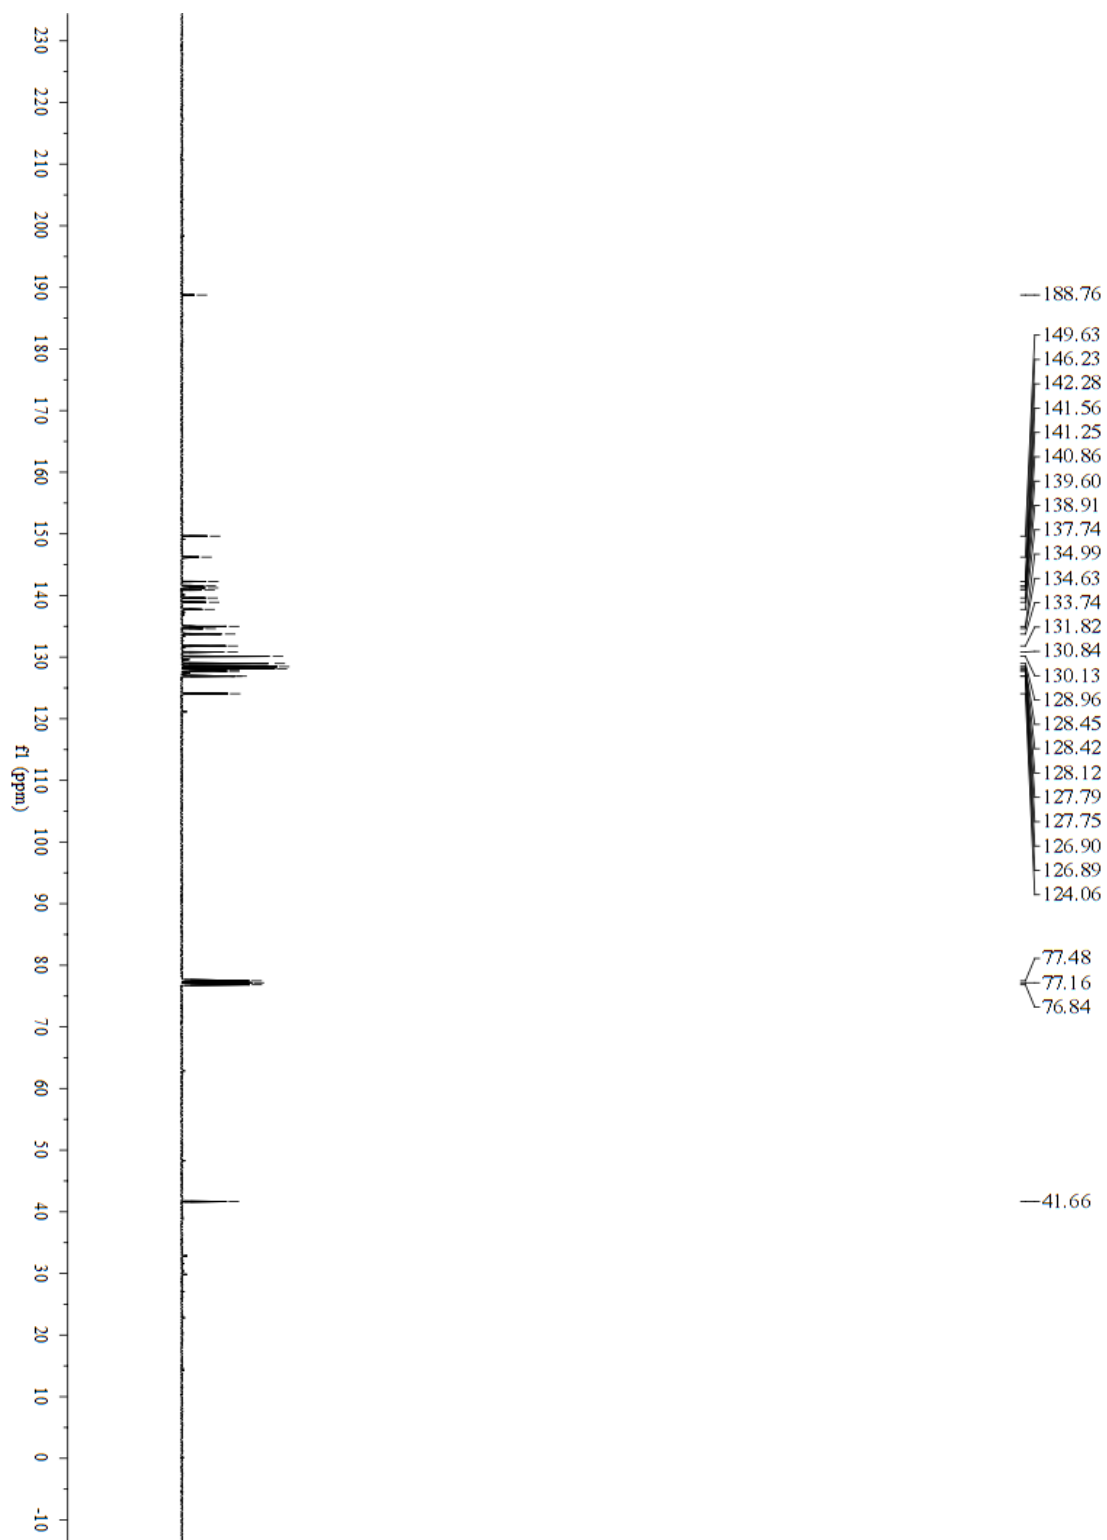

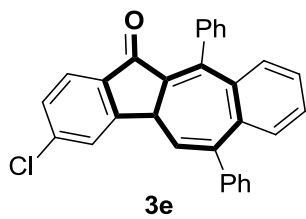

**<sup>1</sup>H NMR (400 MHz, CDCl<sub>3</sub>)**

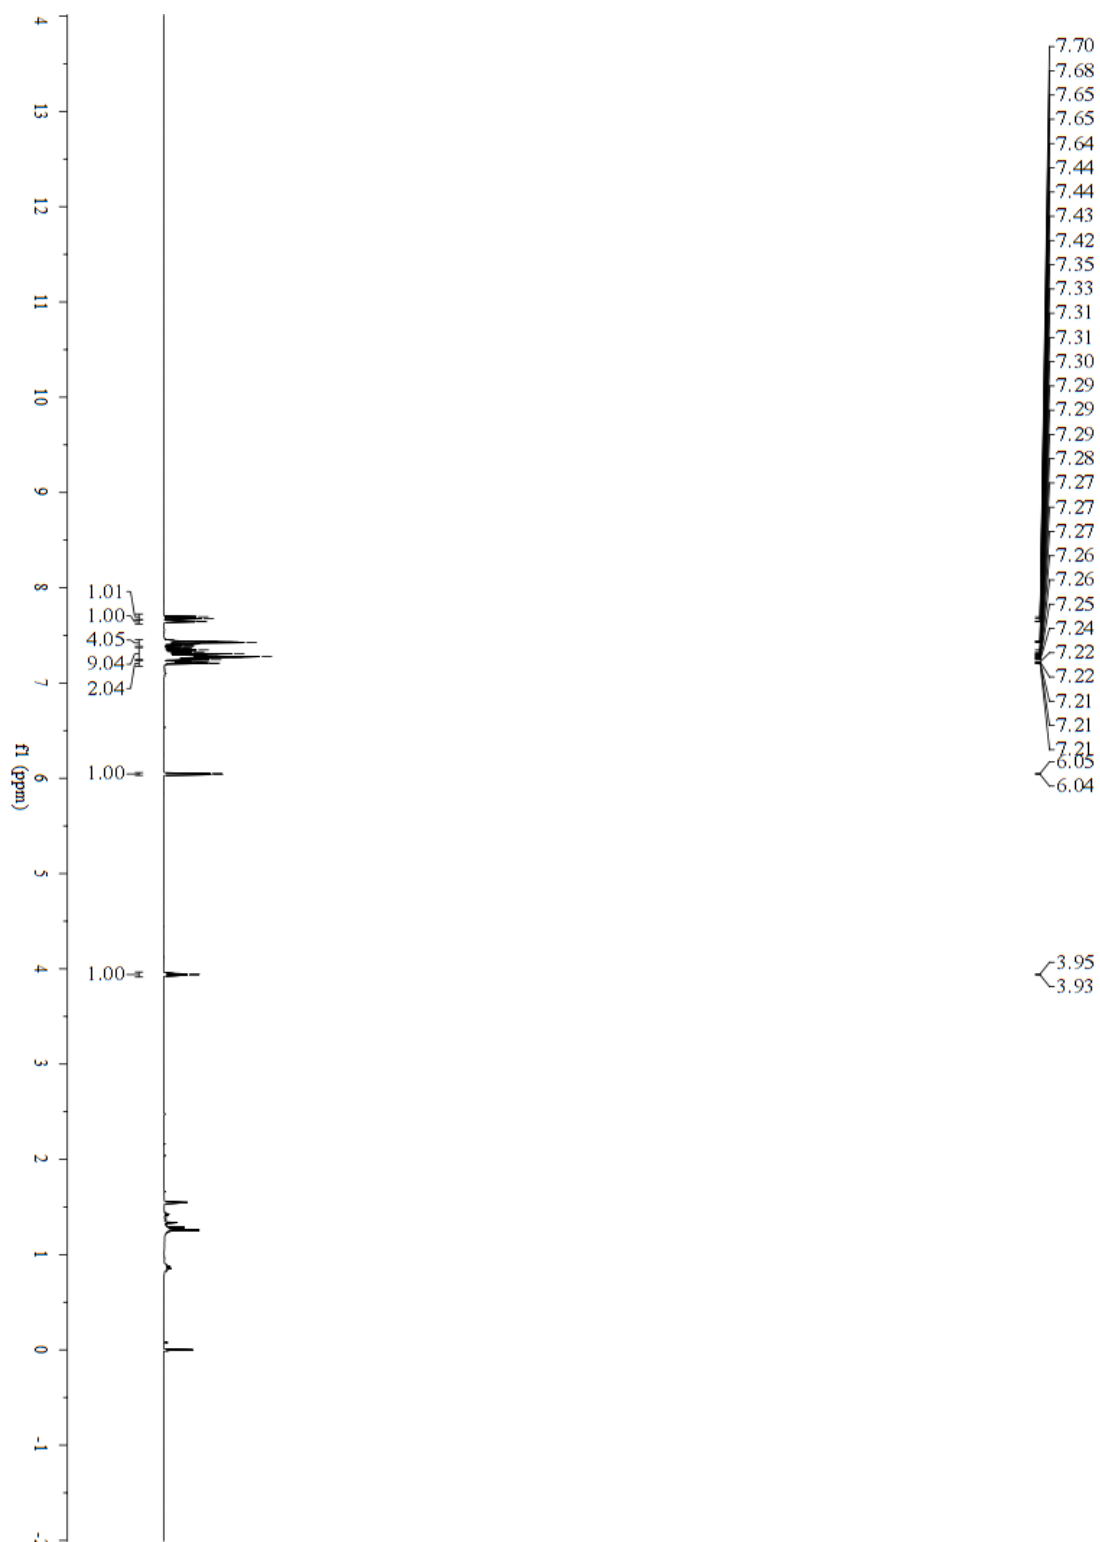

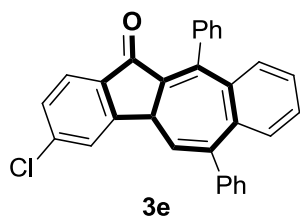

<sup>13</sup>C NMR (100 MHz, CDCl<sub>3</sub>)

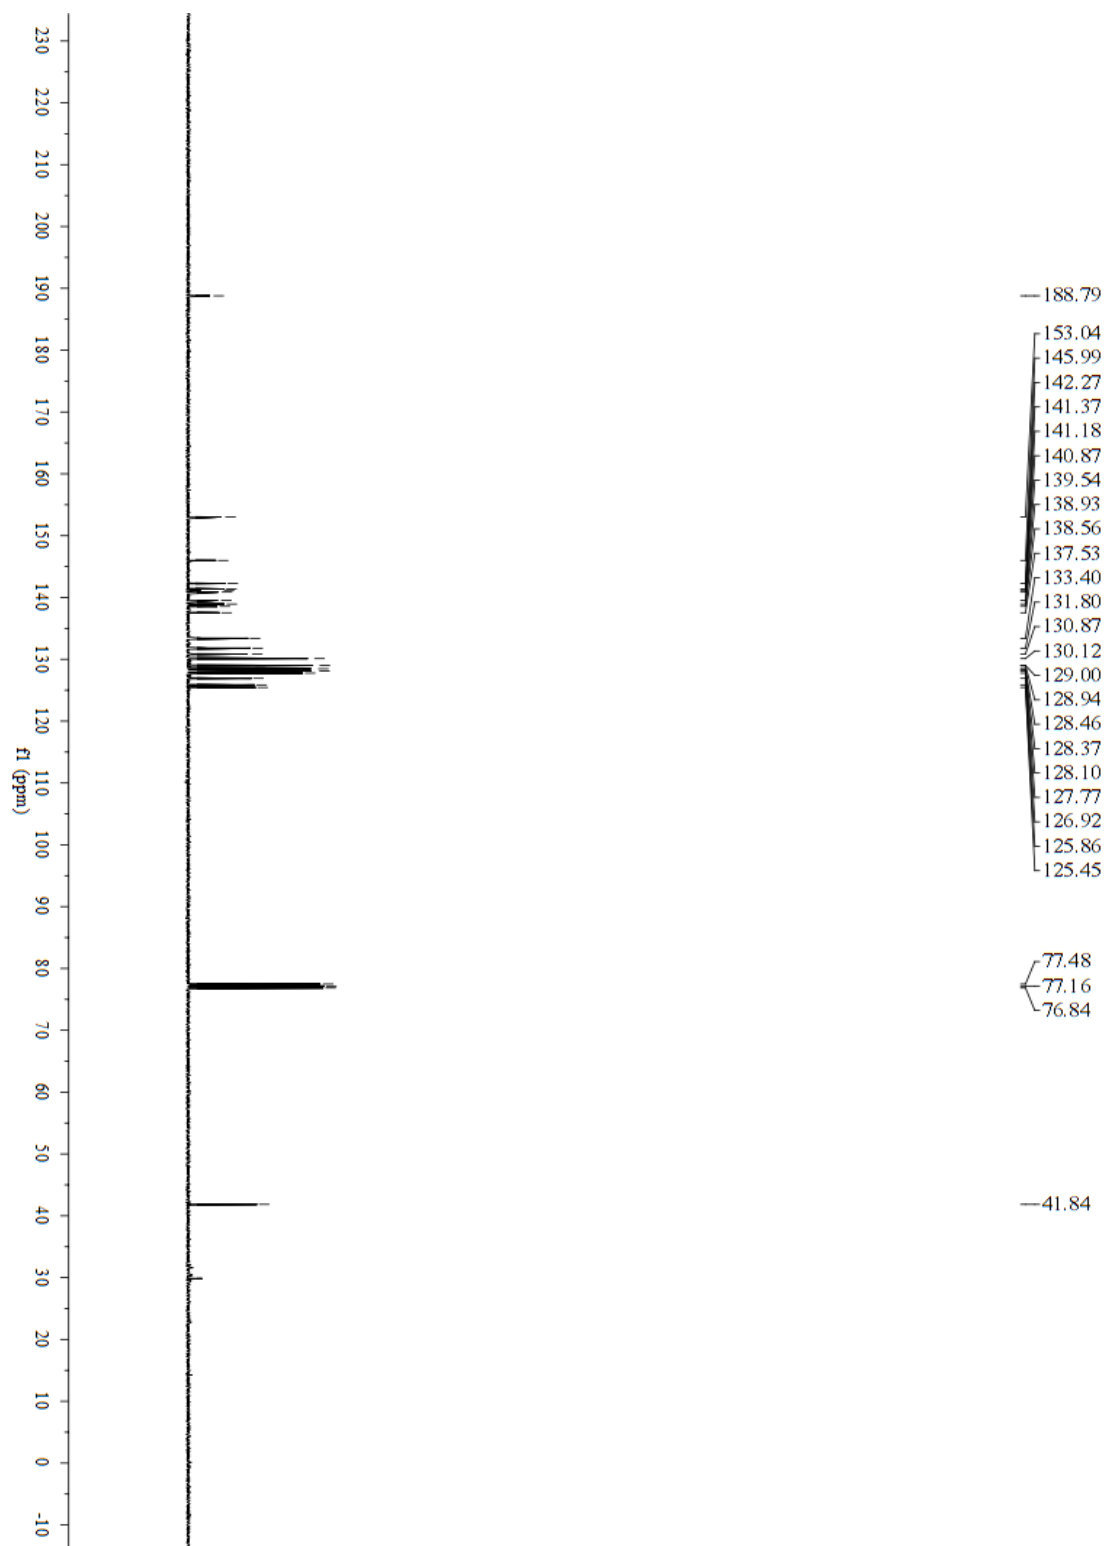

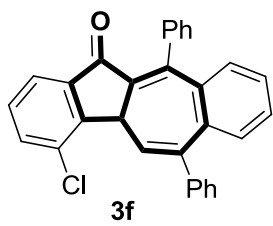

<sup>1</sup>H NMR (400 MHz, CDCl<sub>3</sub>)

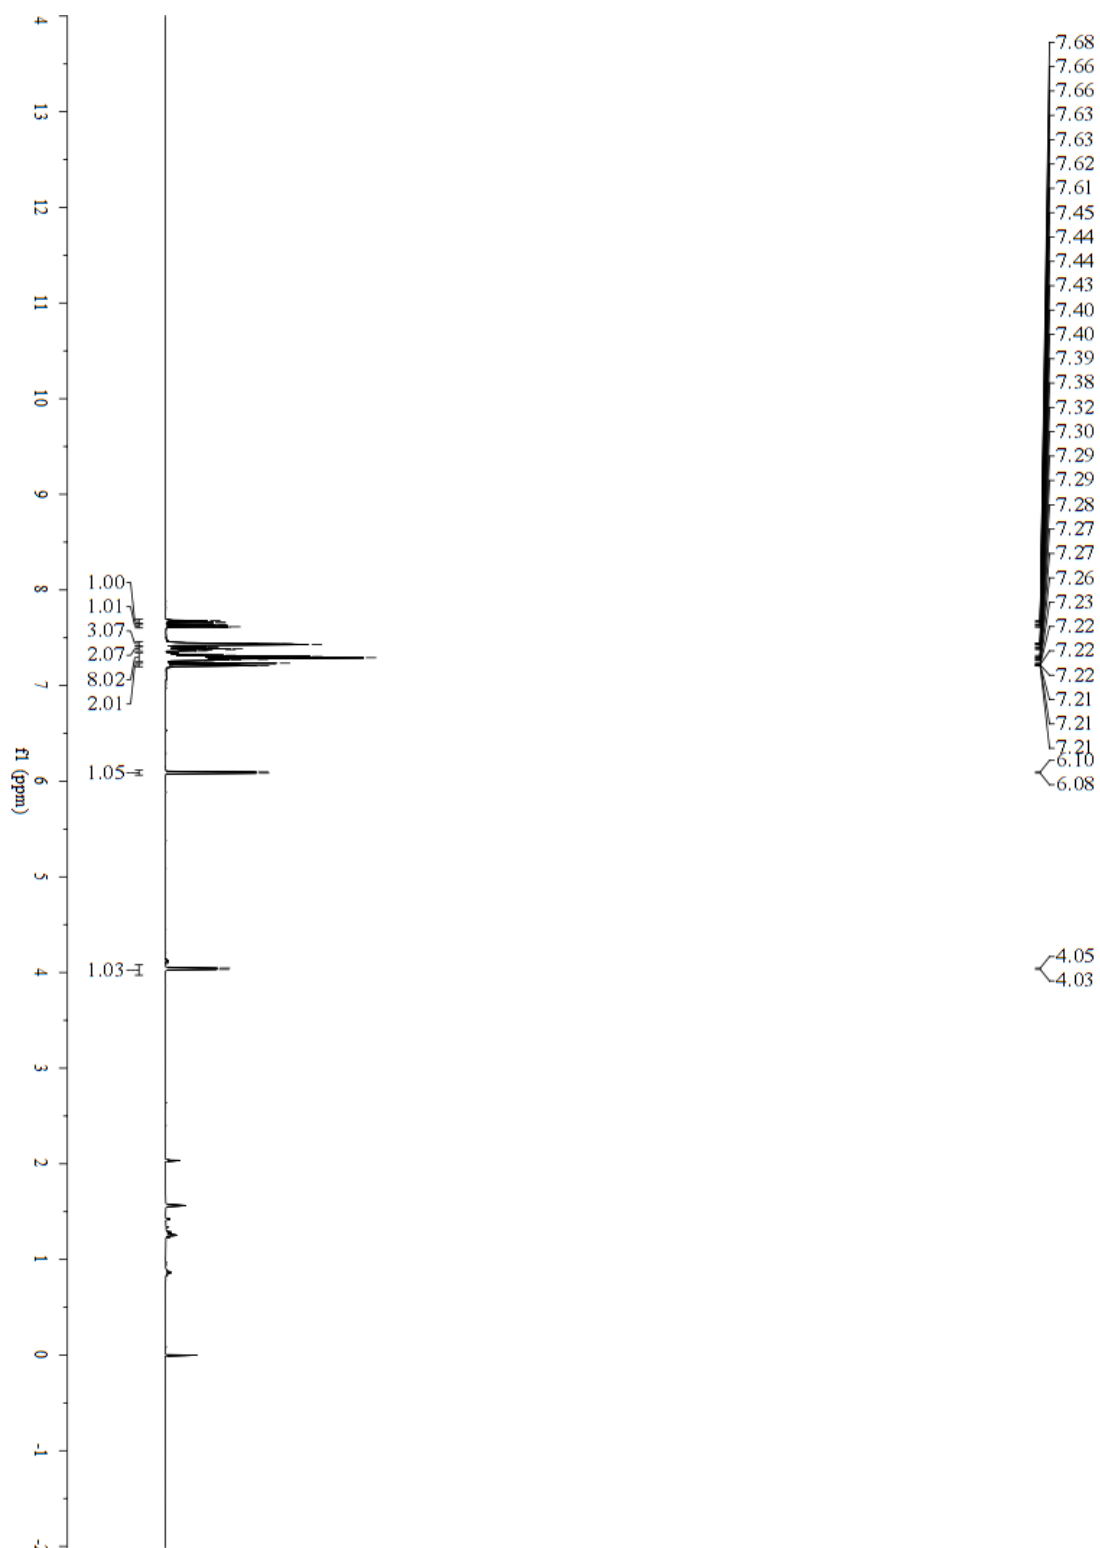

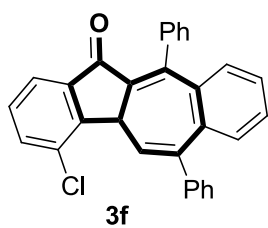

$^{13}\text{C}$  NMR (100 MHz,  $\text{CDCl}_3$ )

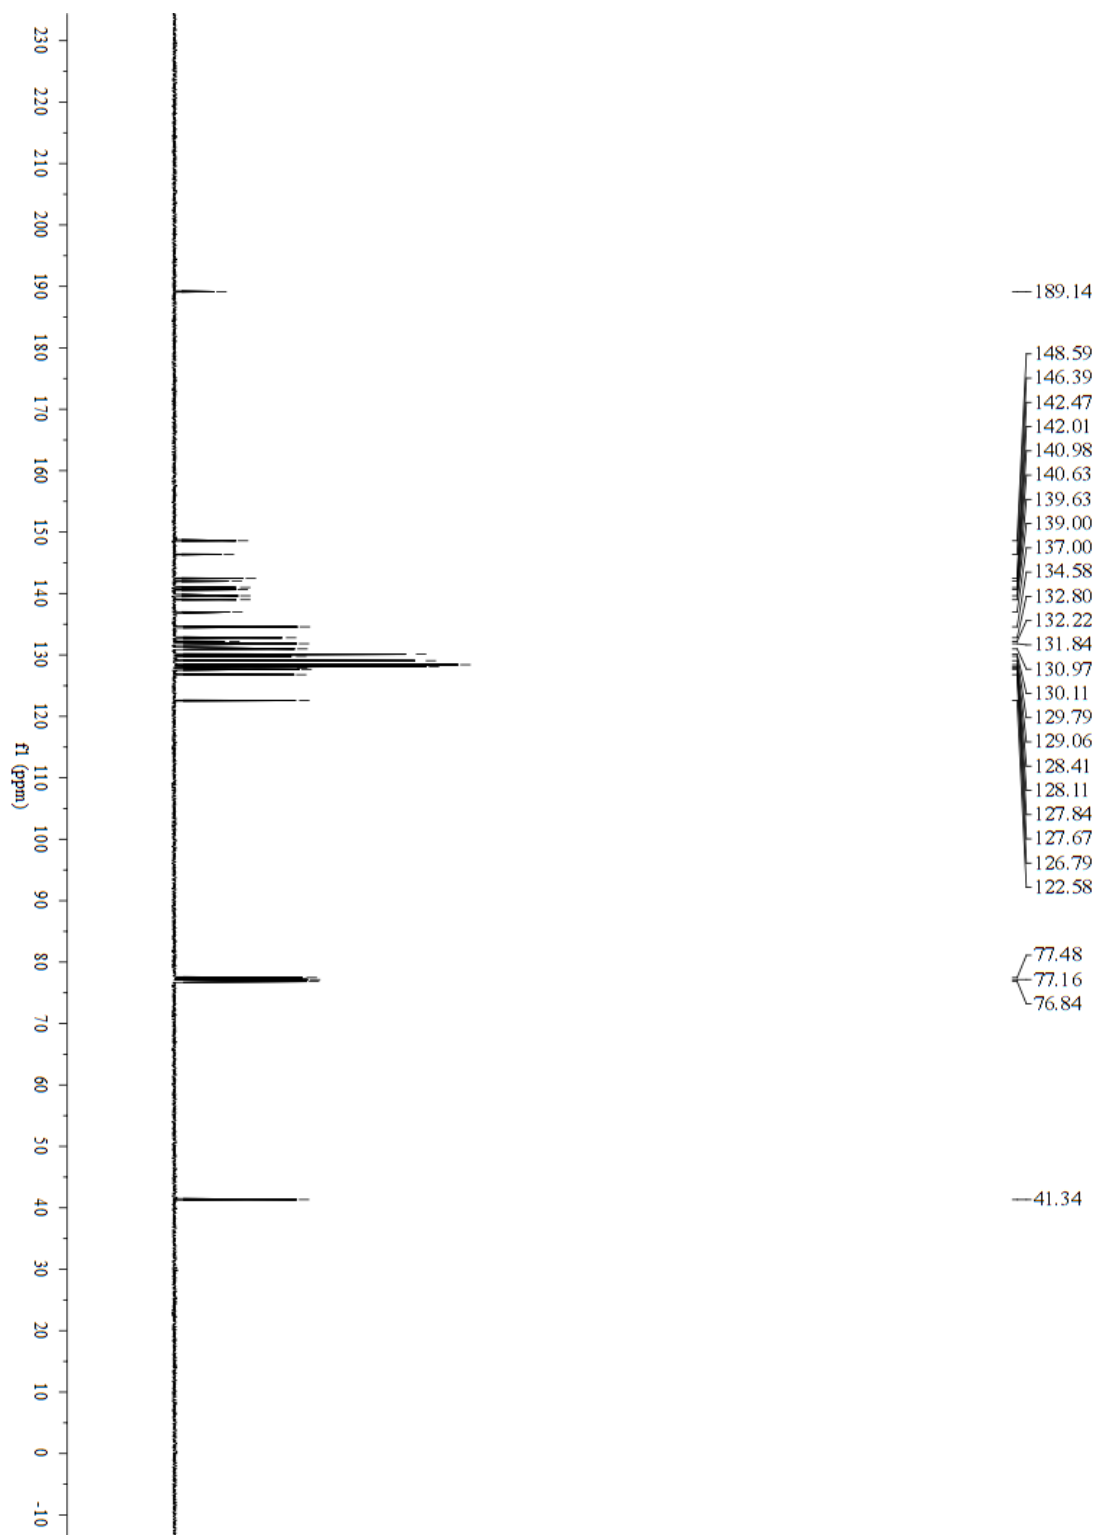

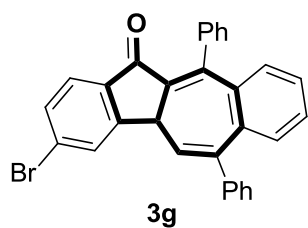

**<sup>1</sup>H NMR (400 MHz, acetone)**

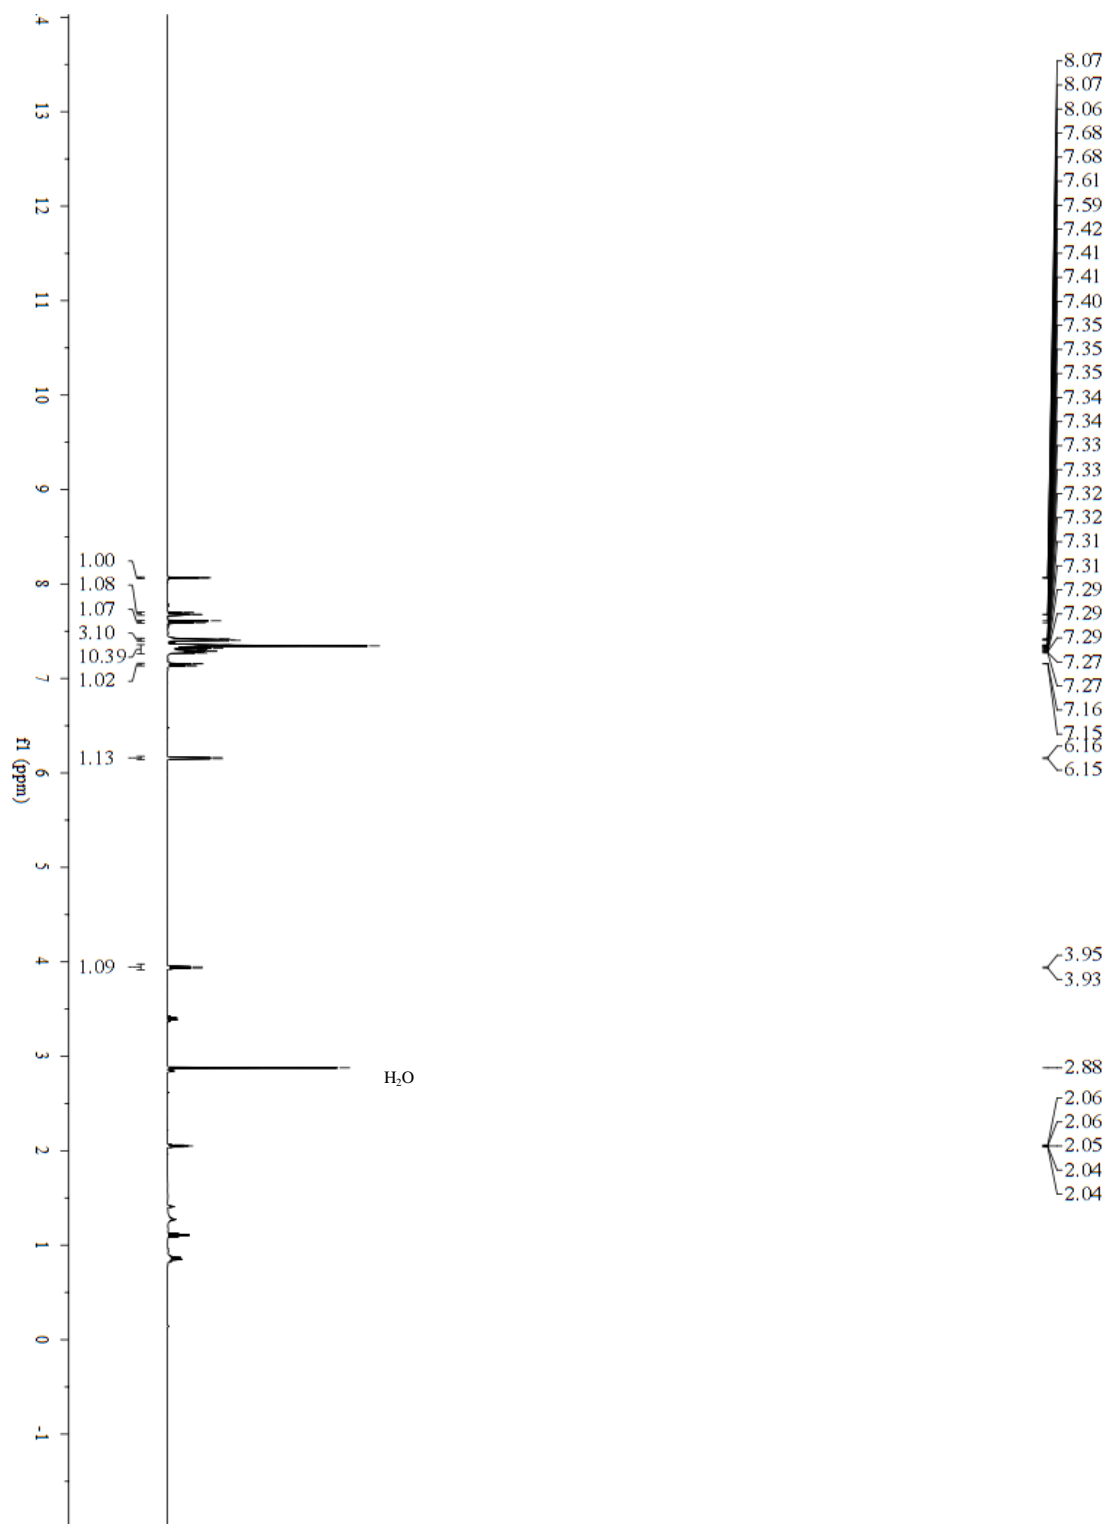

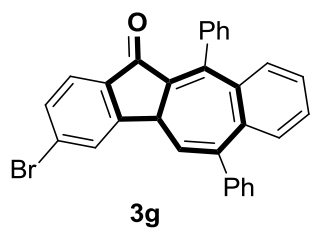

<sup>13</sup>C NMR (100 MHz, acetone)

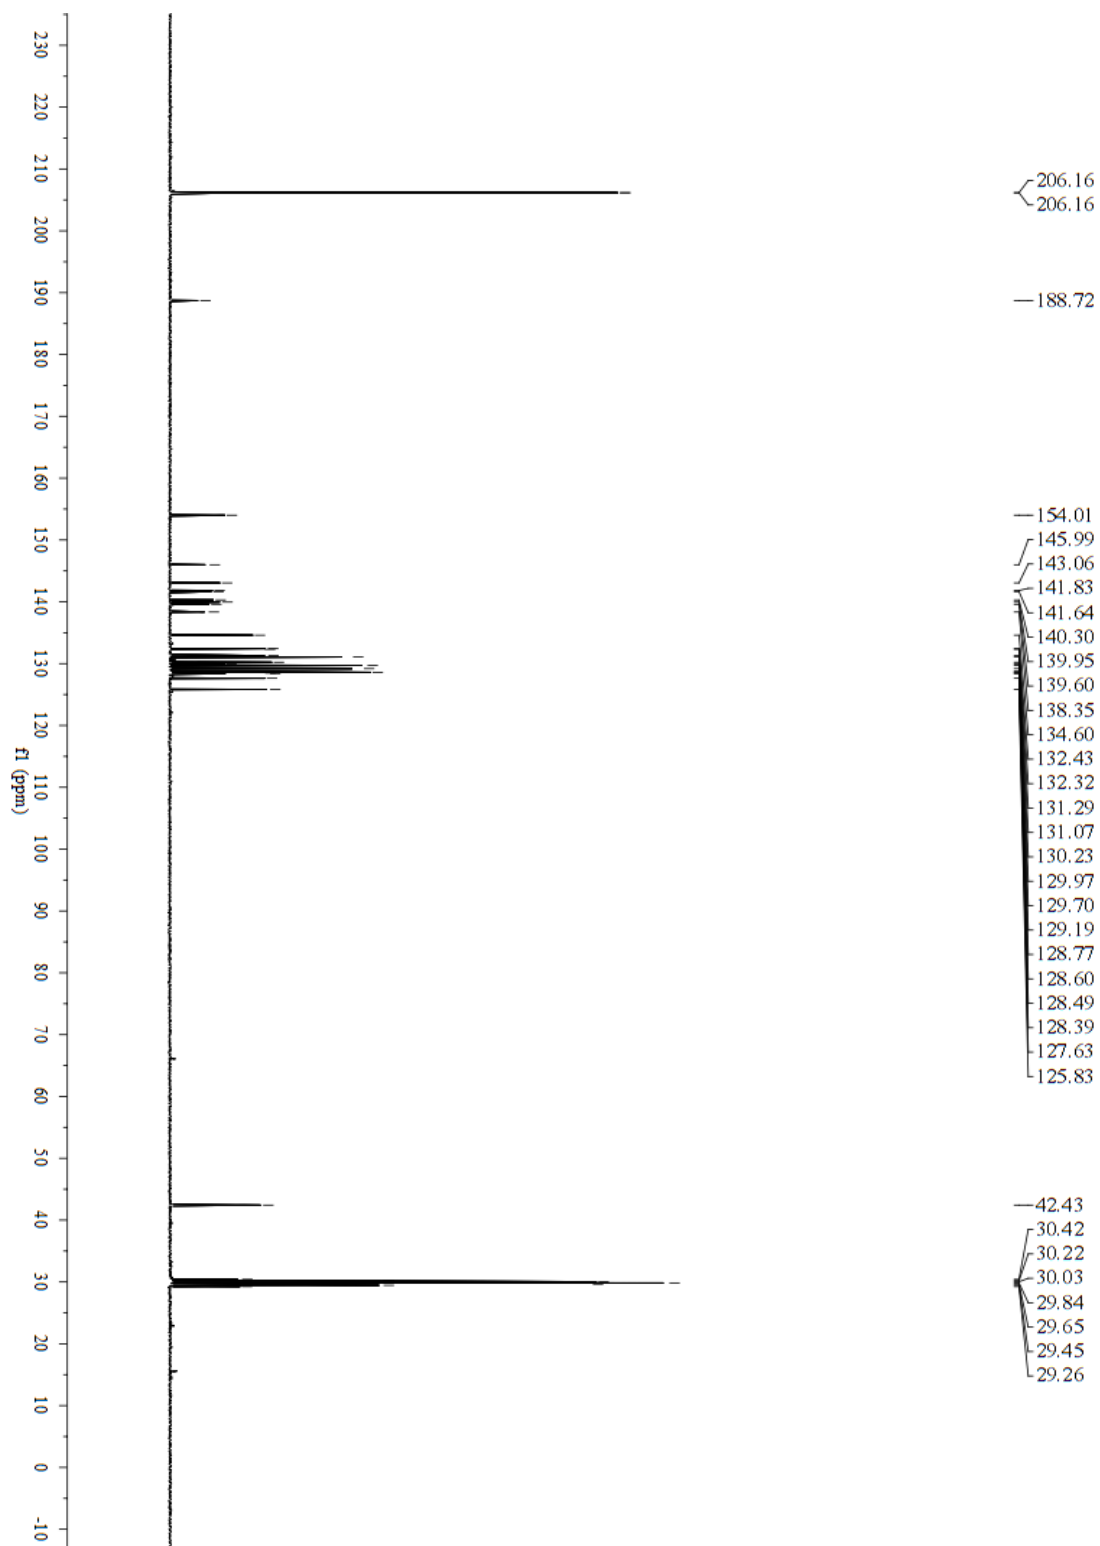



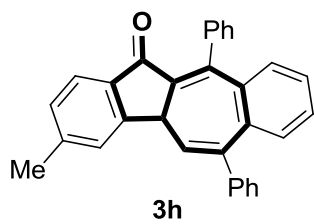

<sup>1</sup>H NMR (400 MHz, CDCl<sub>3</sub>)

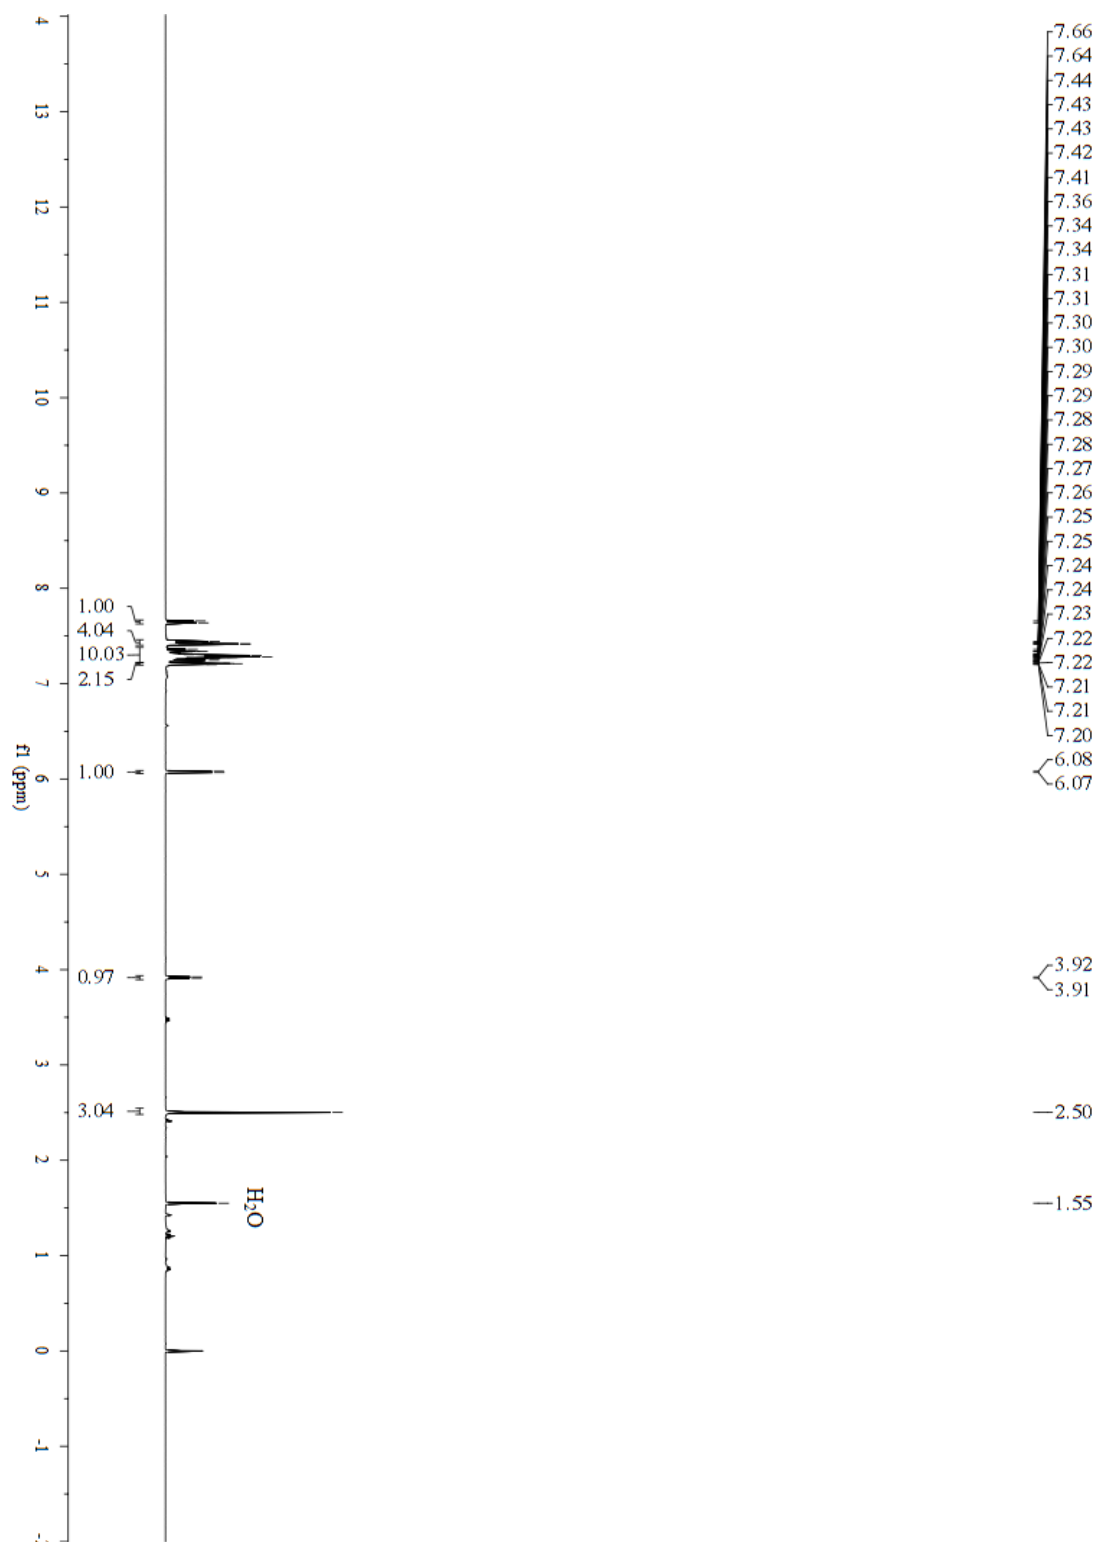

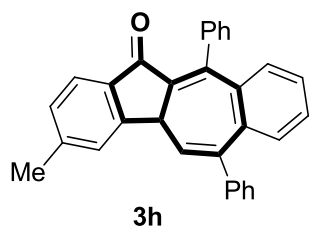

$^{13}\text{C}$  NMR (100 MHz,  $\text{CDCl}_3$ )

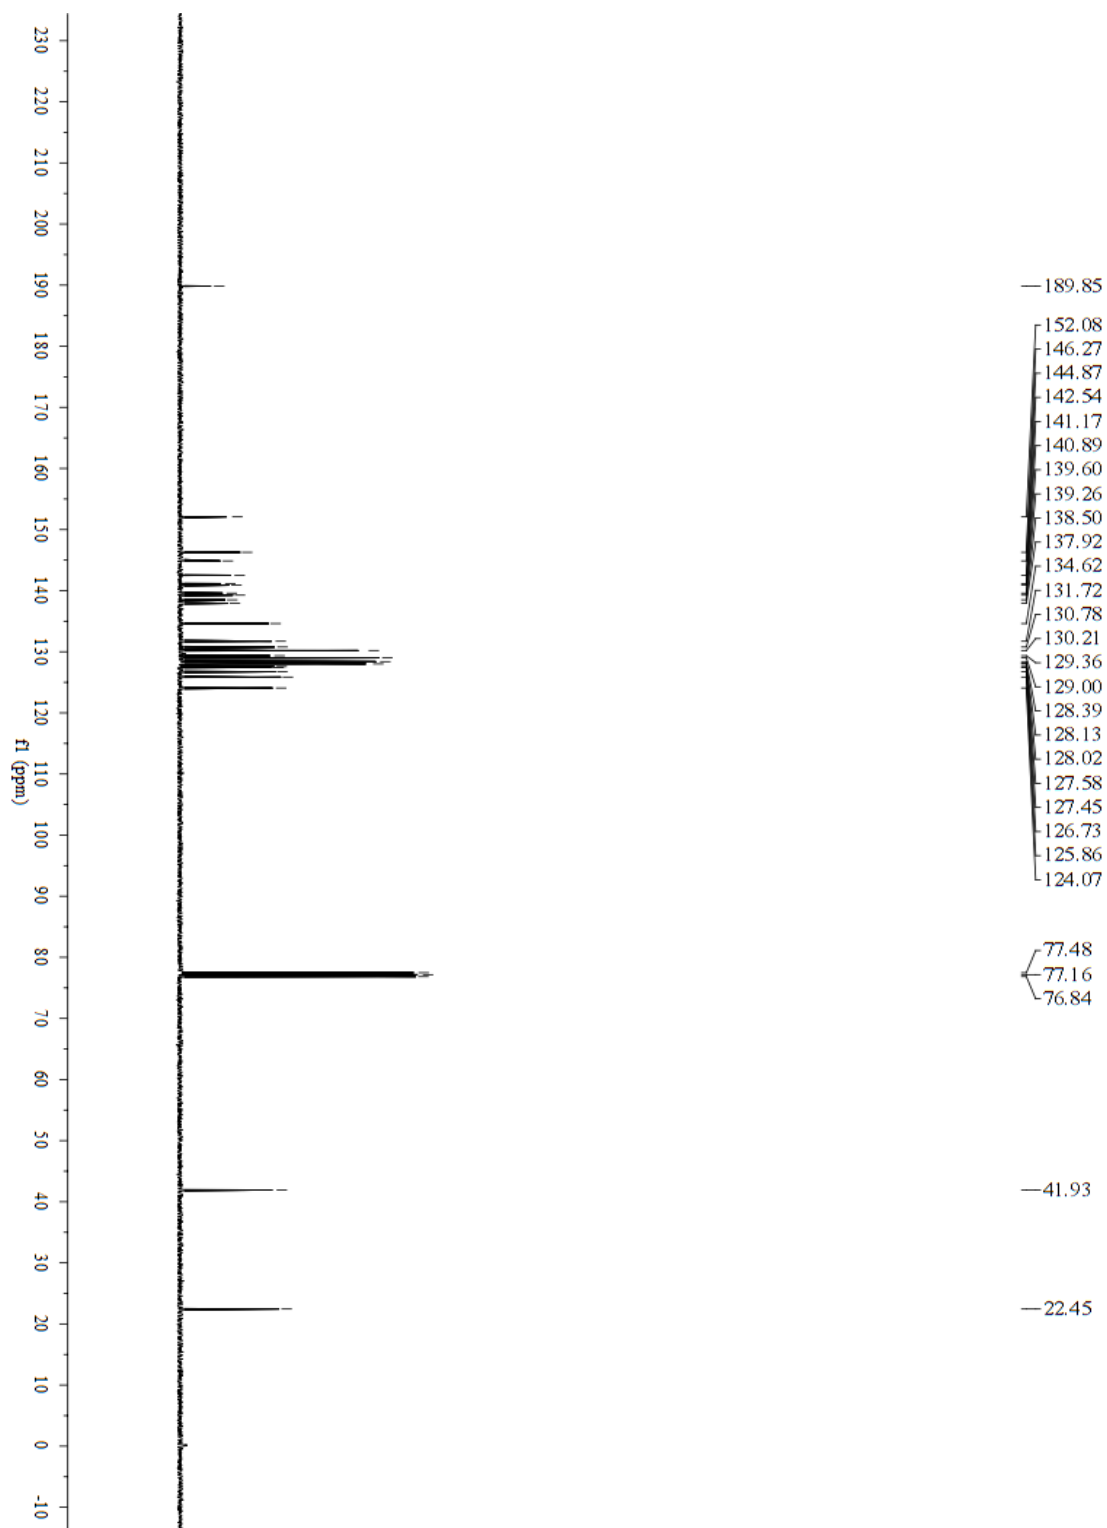

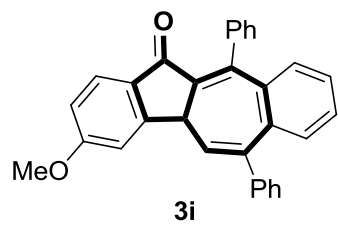

<sup>1</sup>H NMR (400 MHz, acetone)

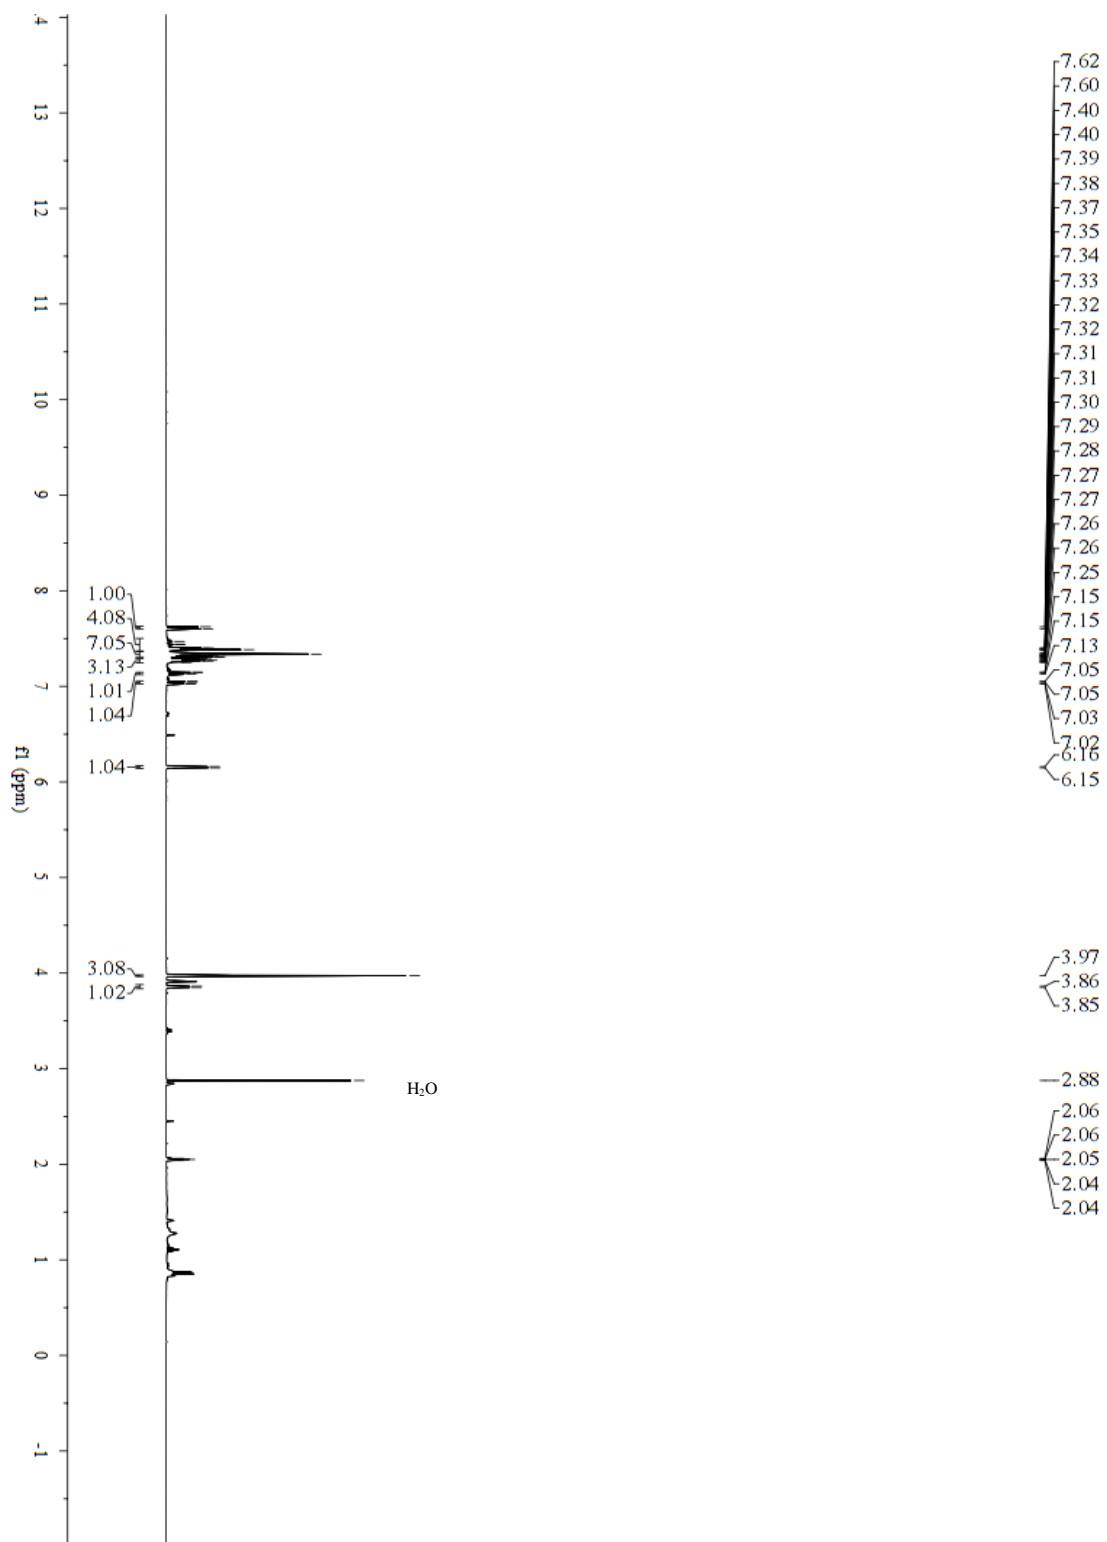

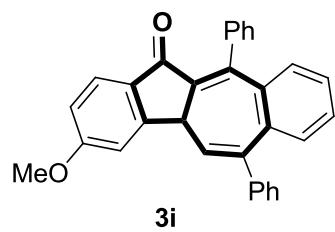

<sup>13</sup>C NMR (100 MHz, acetone)

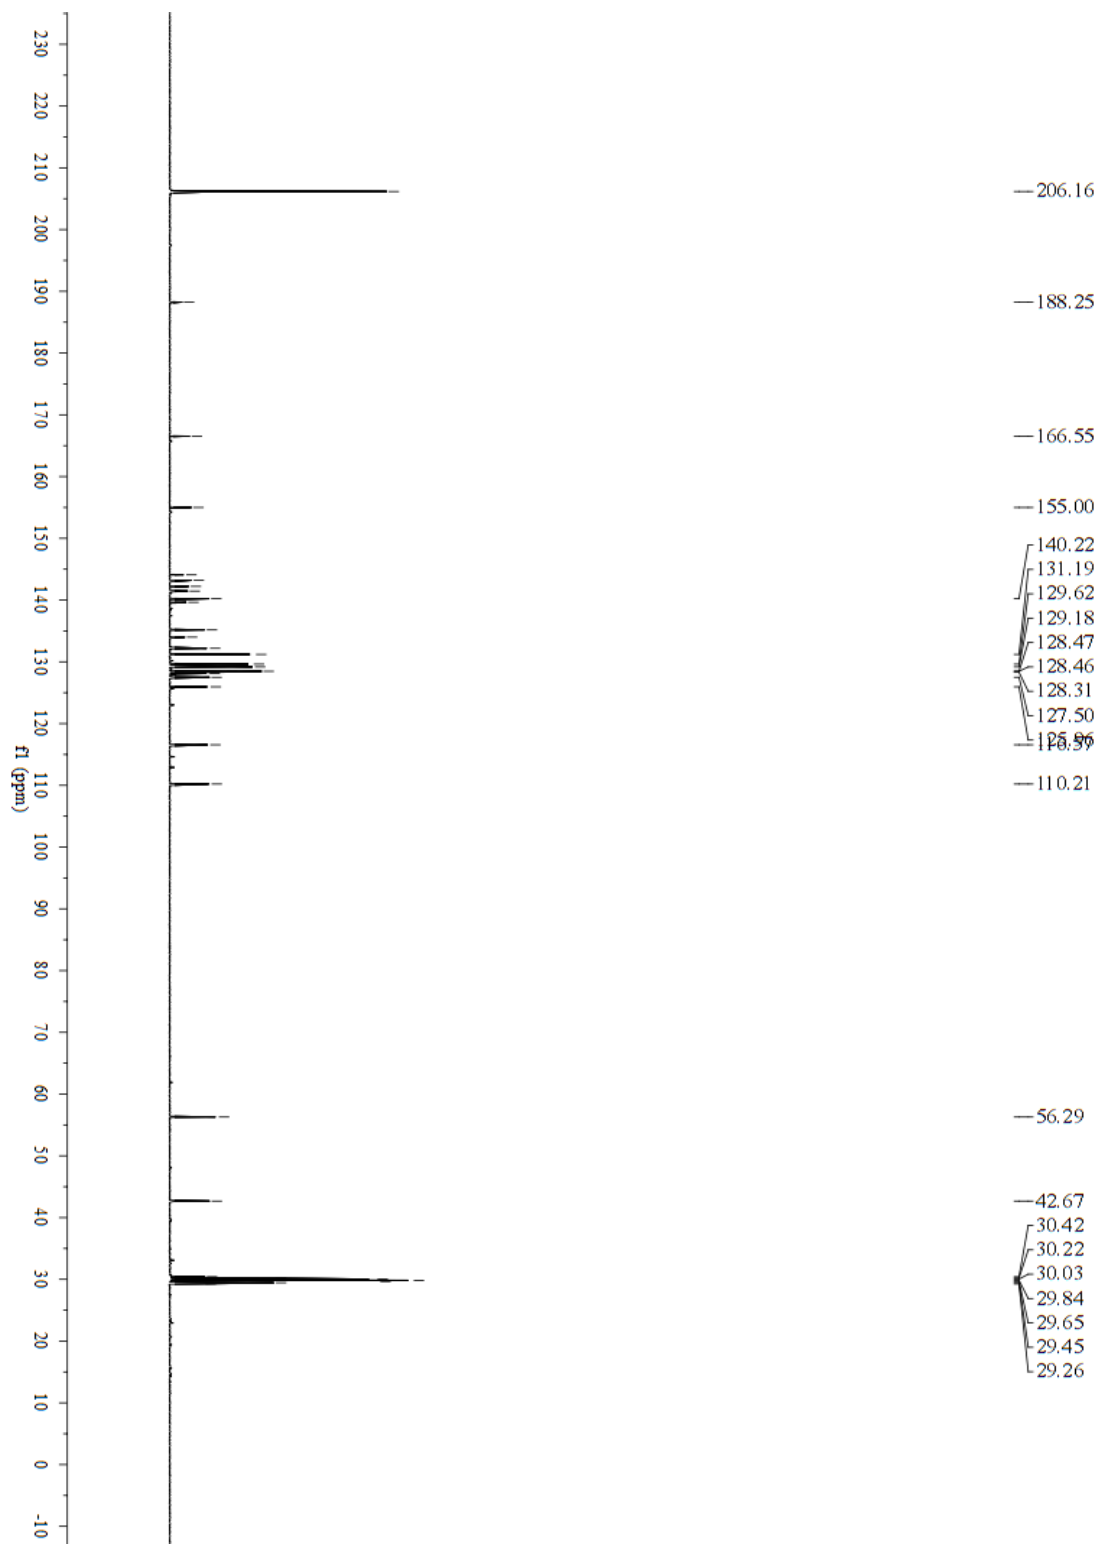

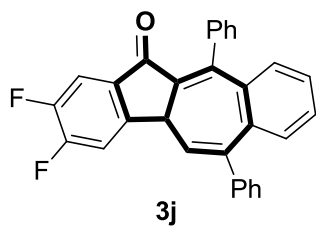

**<sup>1</sup>H NMR (400 MHz, acetone)**

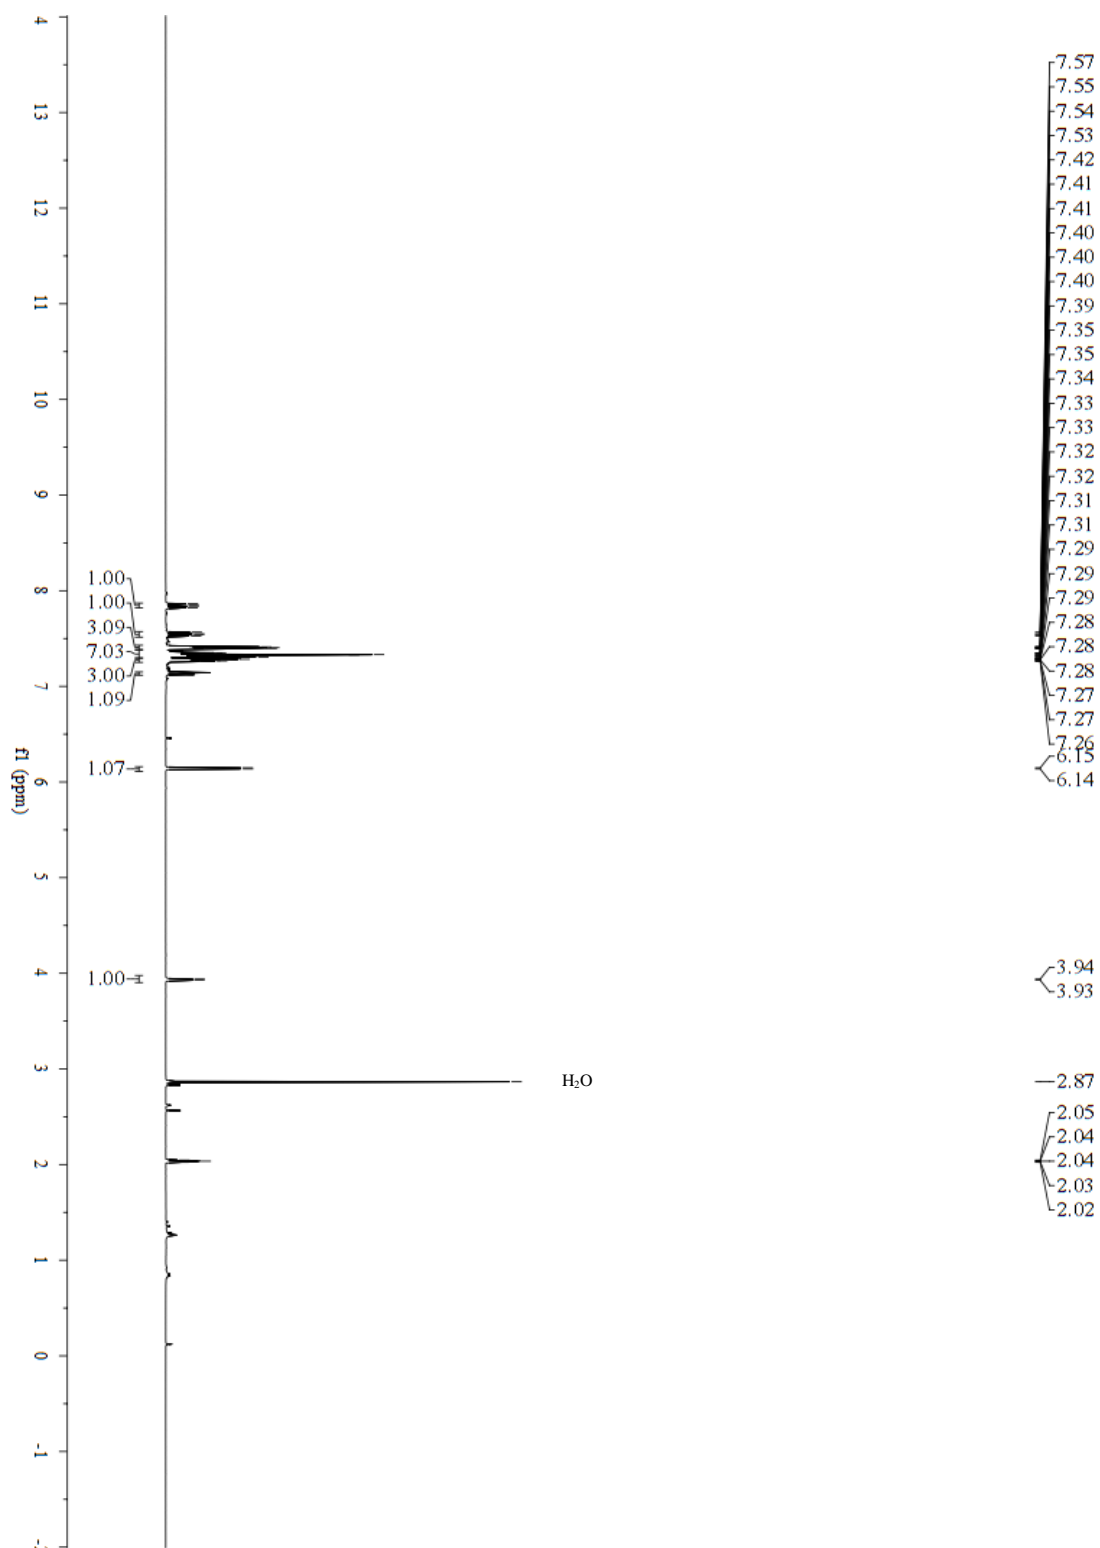

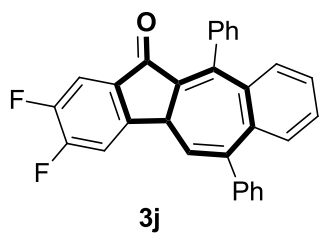

$^{13}\text{C}$  NMR (100 MHz, acetone)

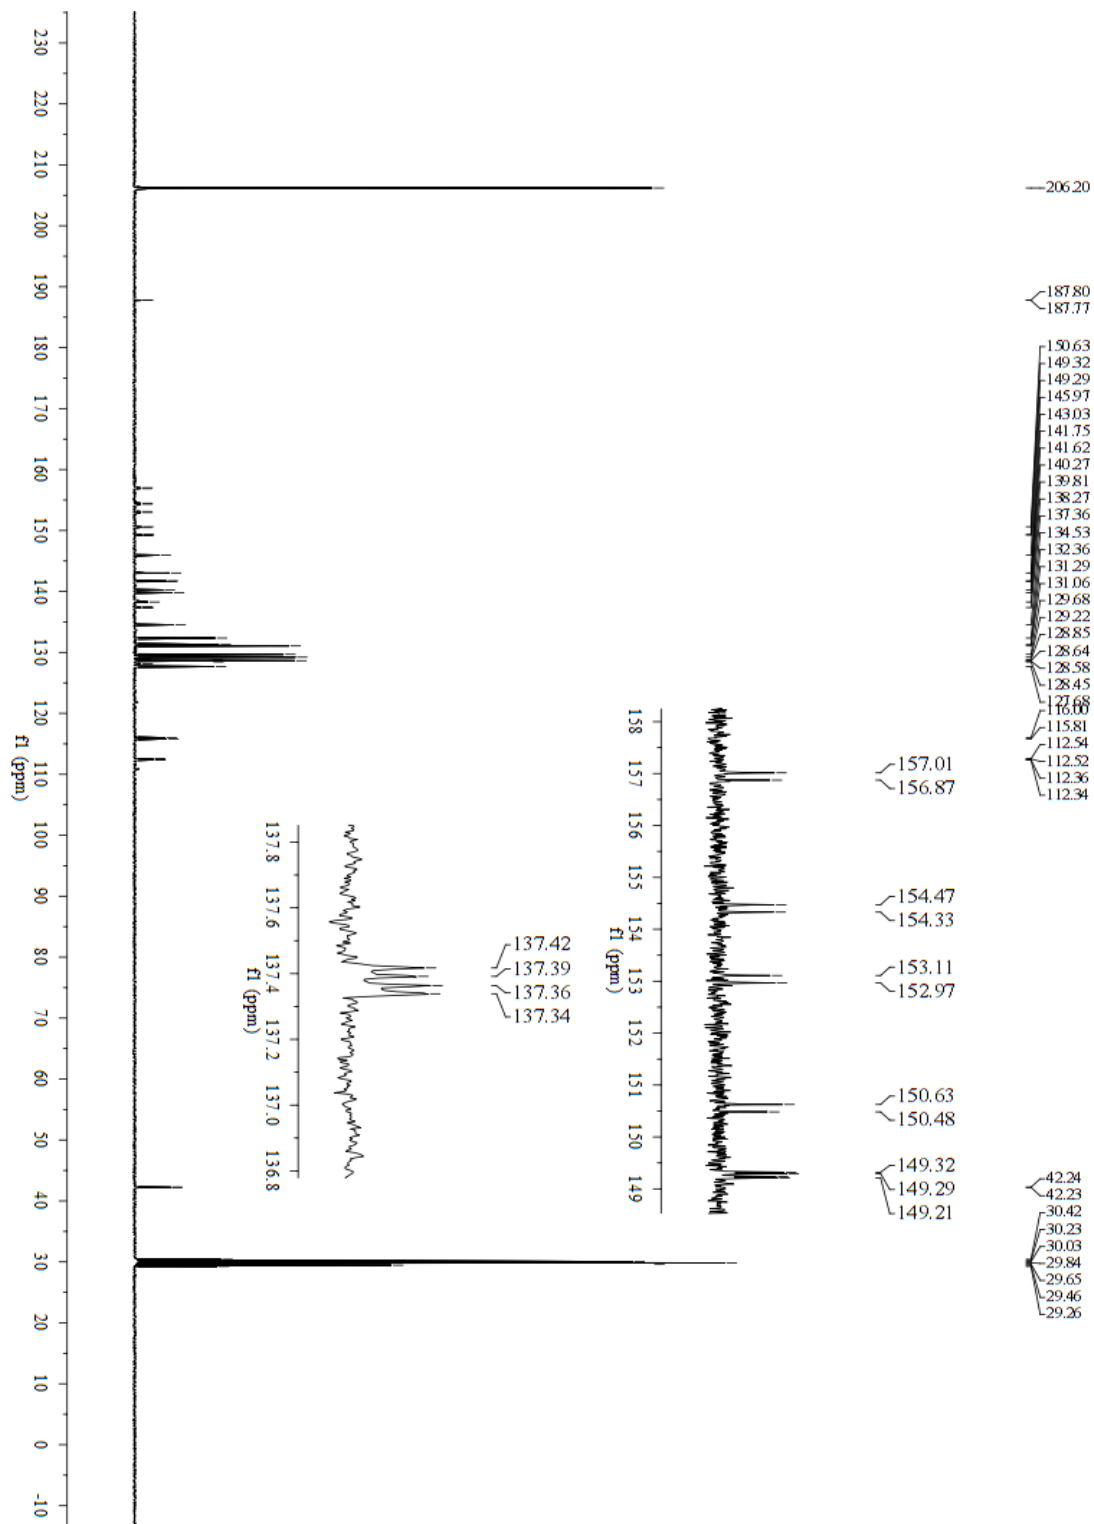

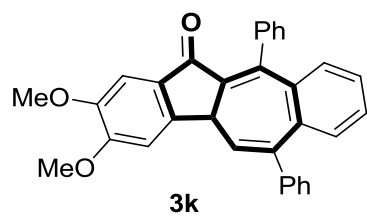

<sup>1</sup>H NMR (400 MHz, CDCl<sub>3</sub>)

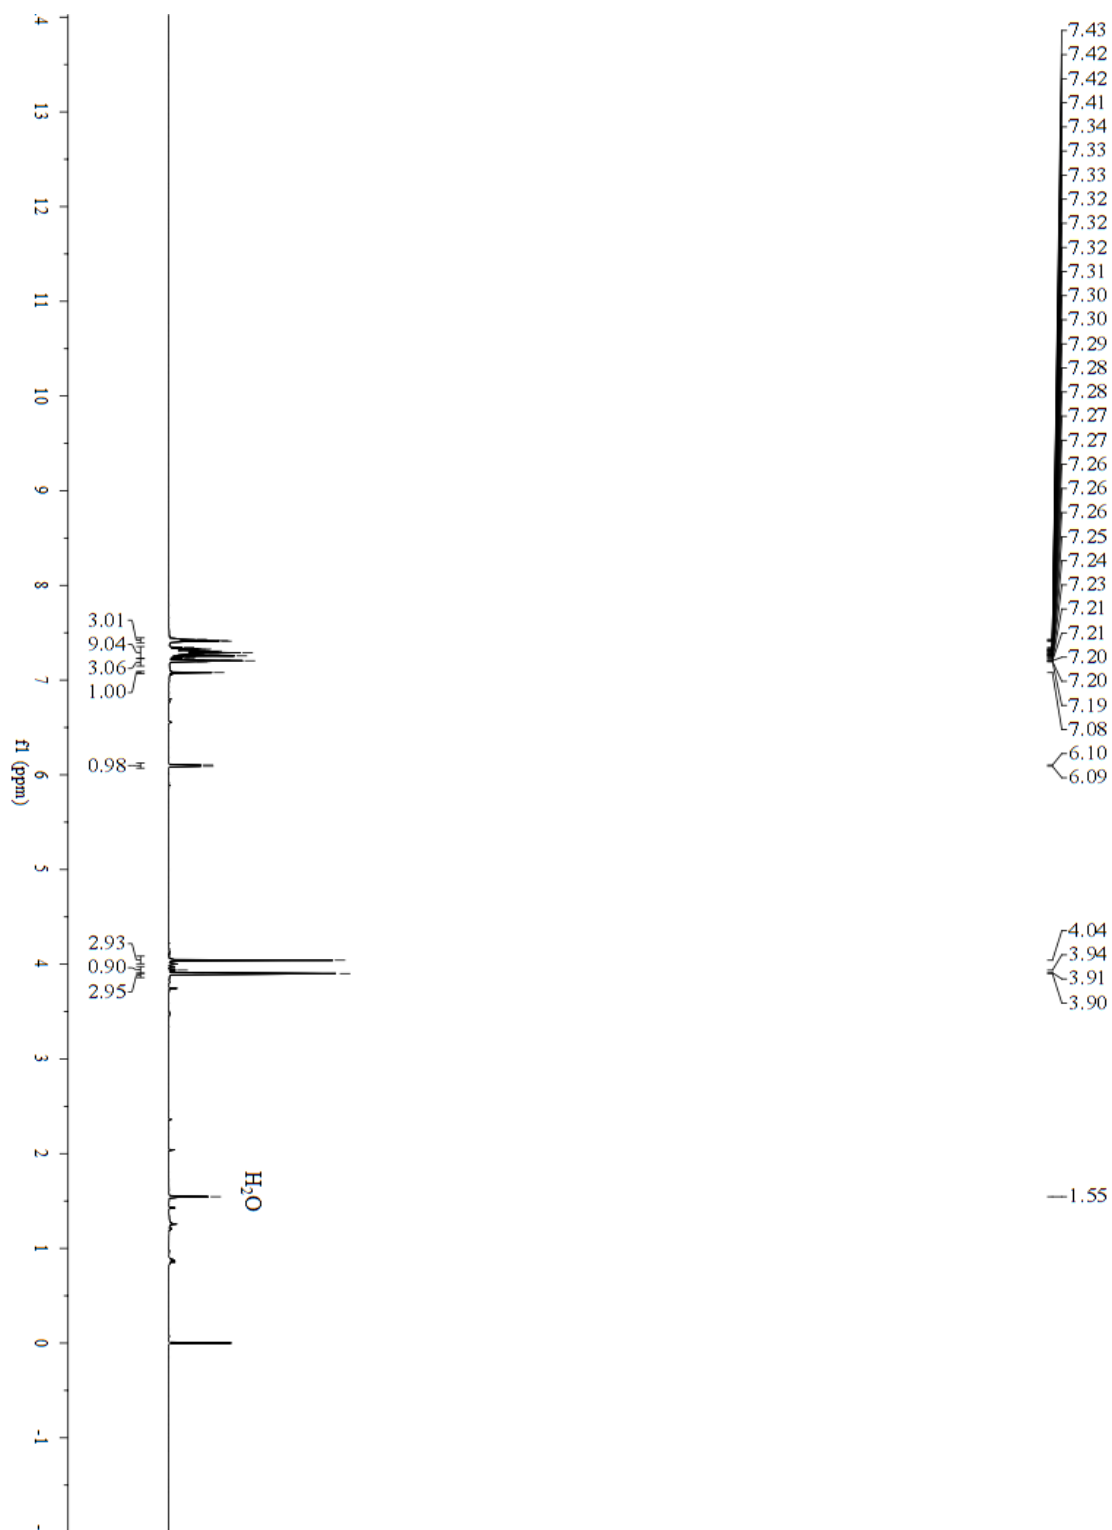

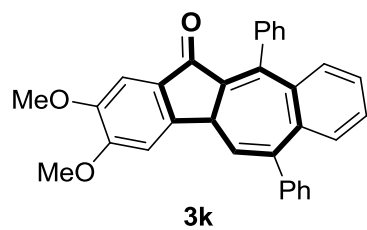

$^{13}\text{C}$  NMR (100 MHz,  $\text{CDCl}_3$ )

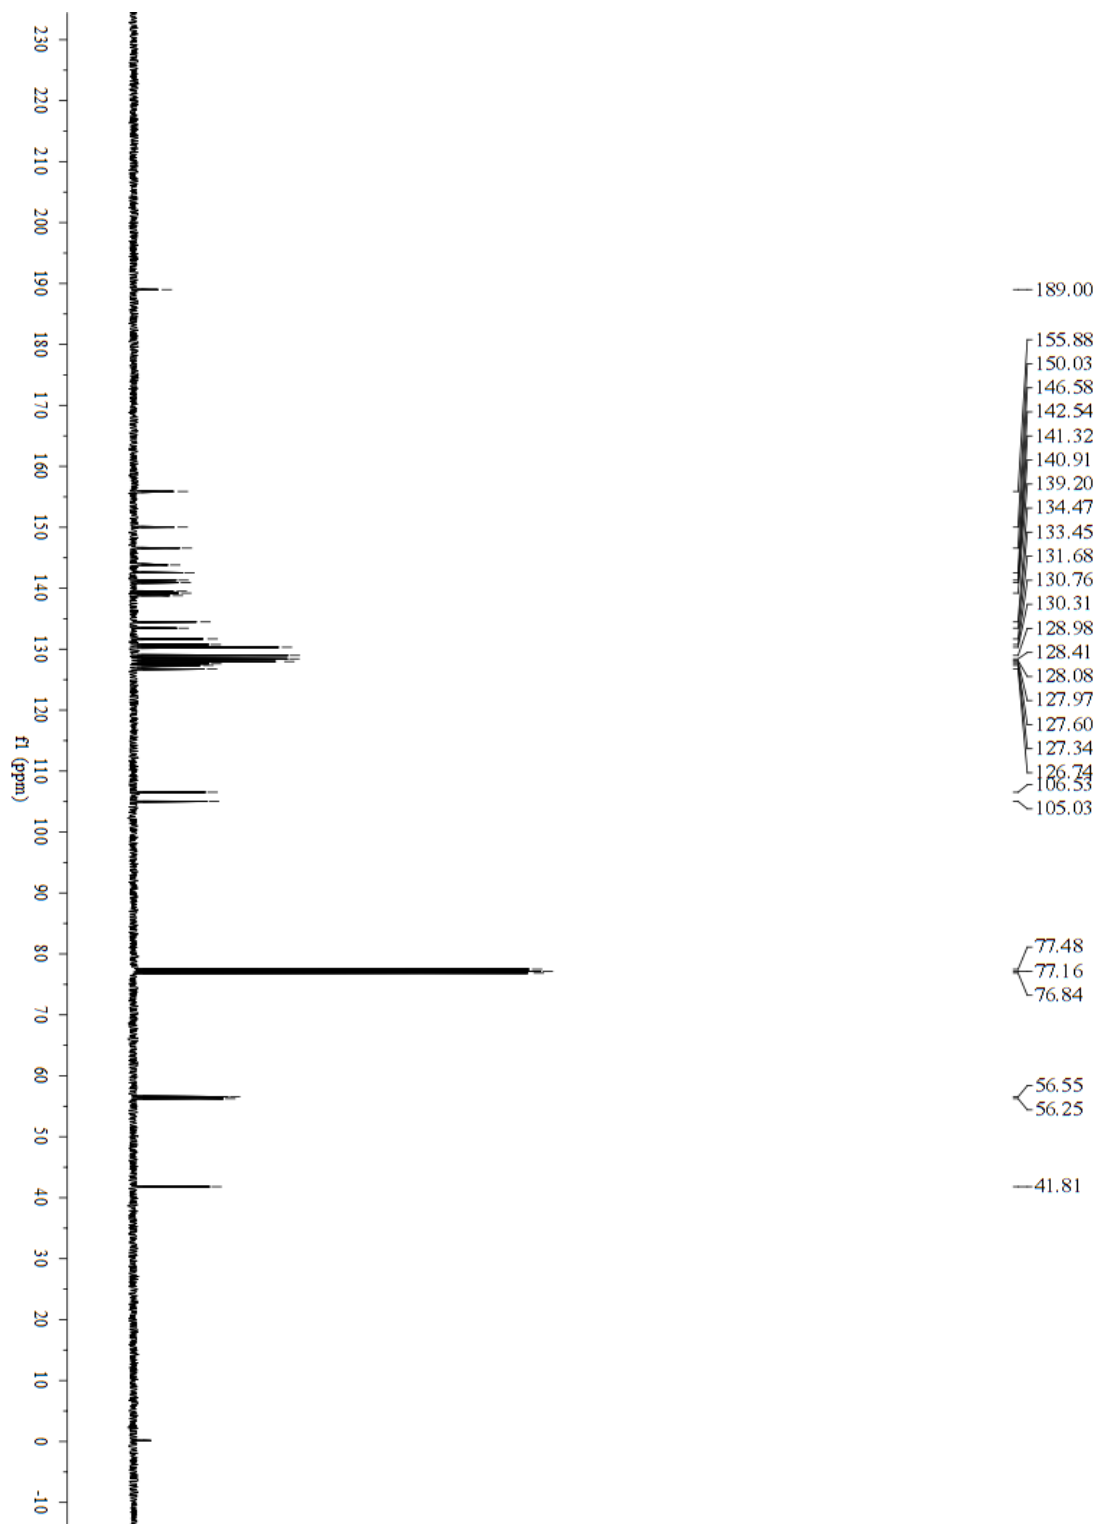



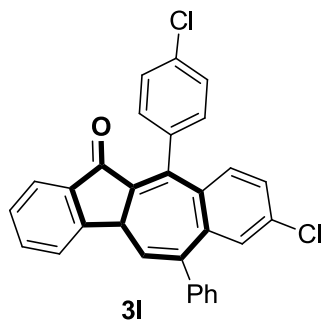

<sup>1</sup>H NMR (400 MHz, CDCl<sub>3</sub>)

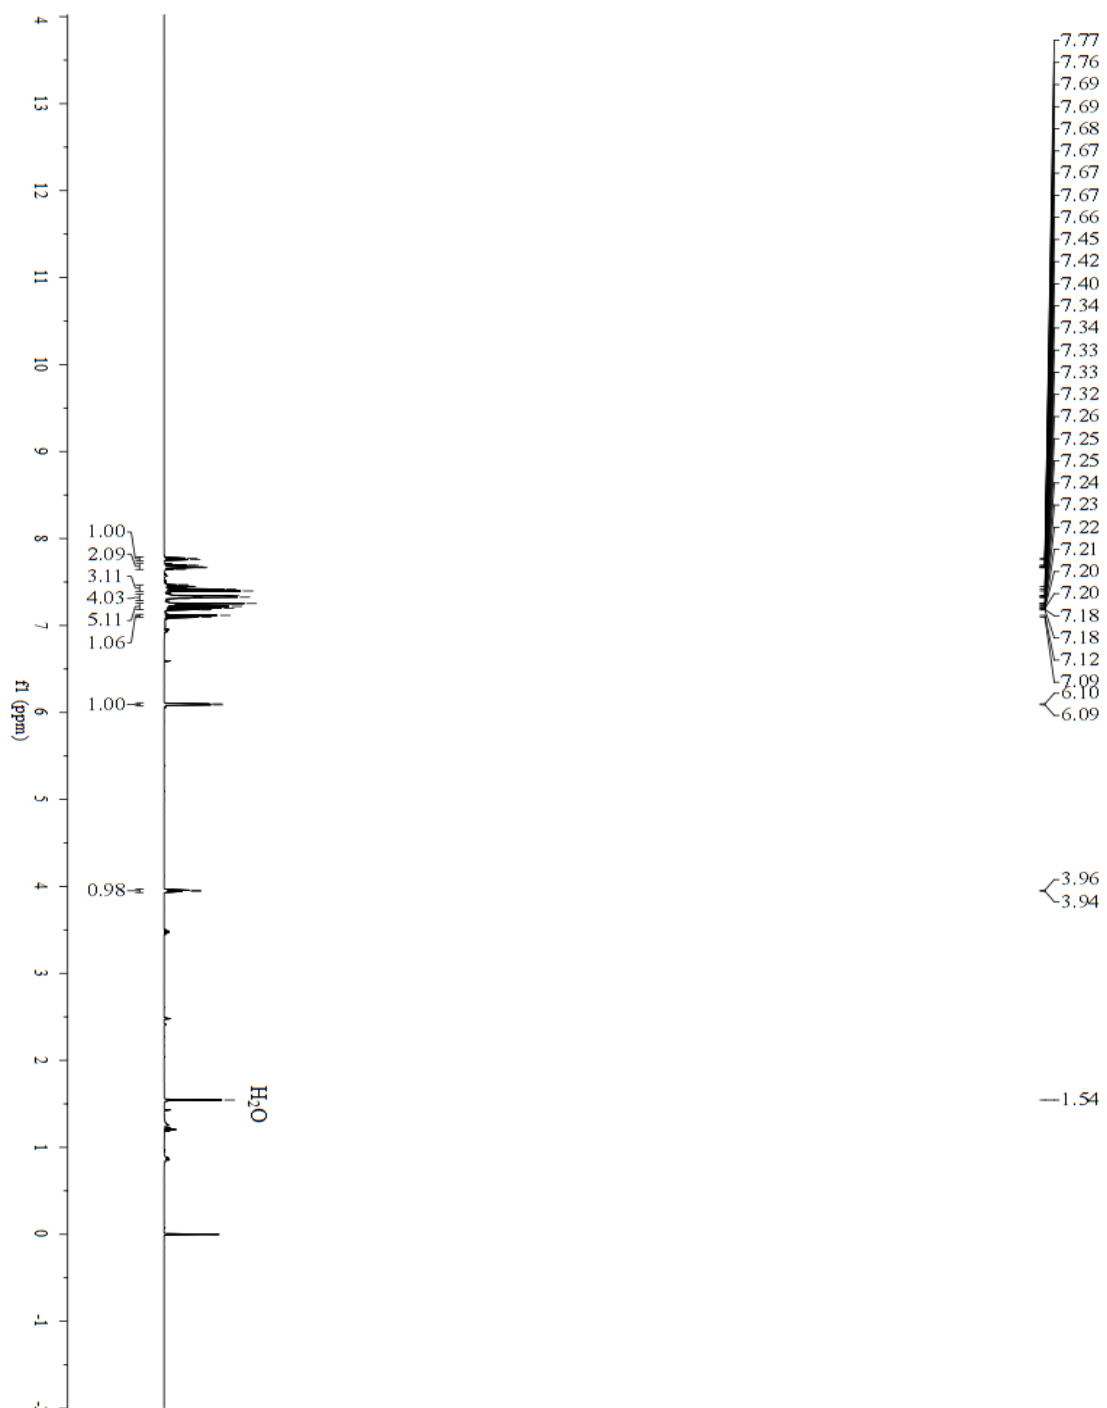

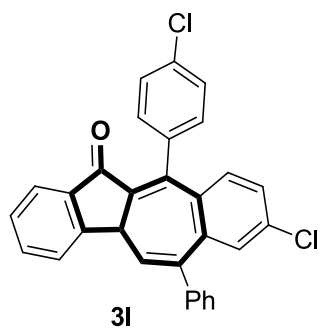

$^{13}\text{C}$  NMR (100 MHz,  $\text{CDCl}_3$ )

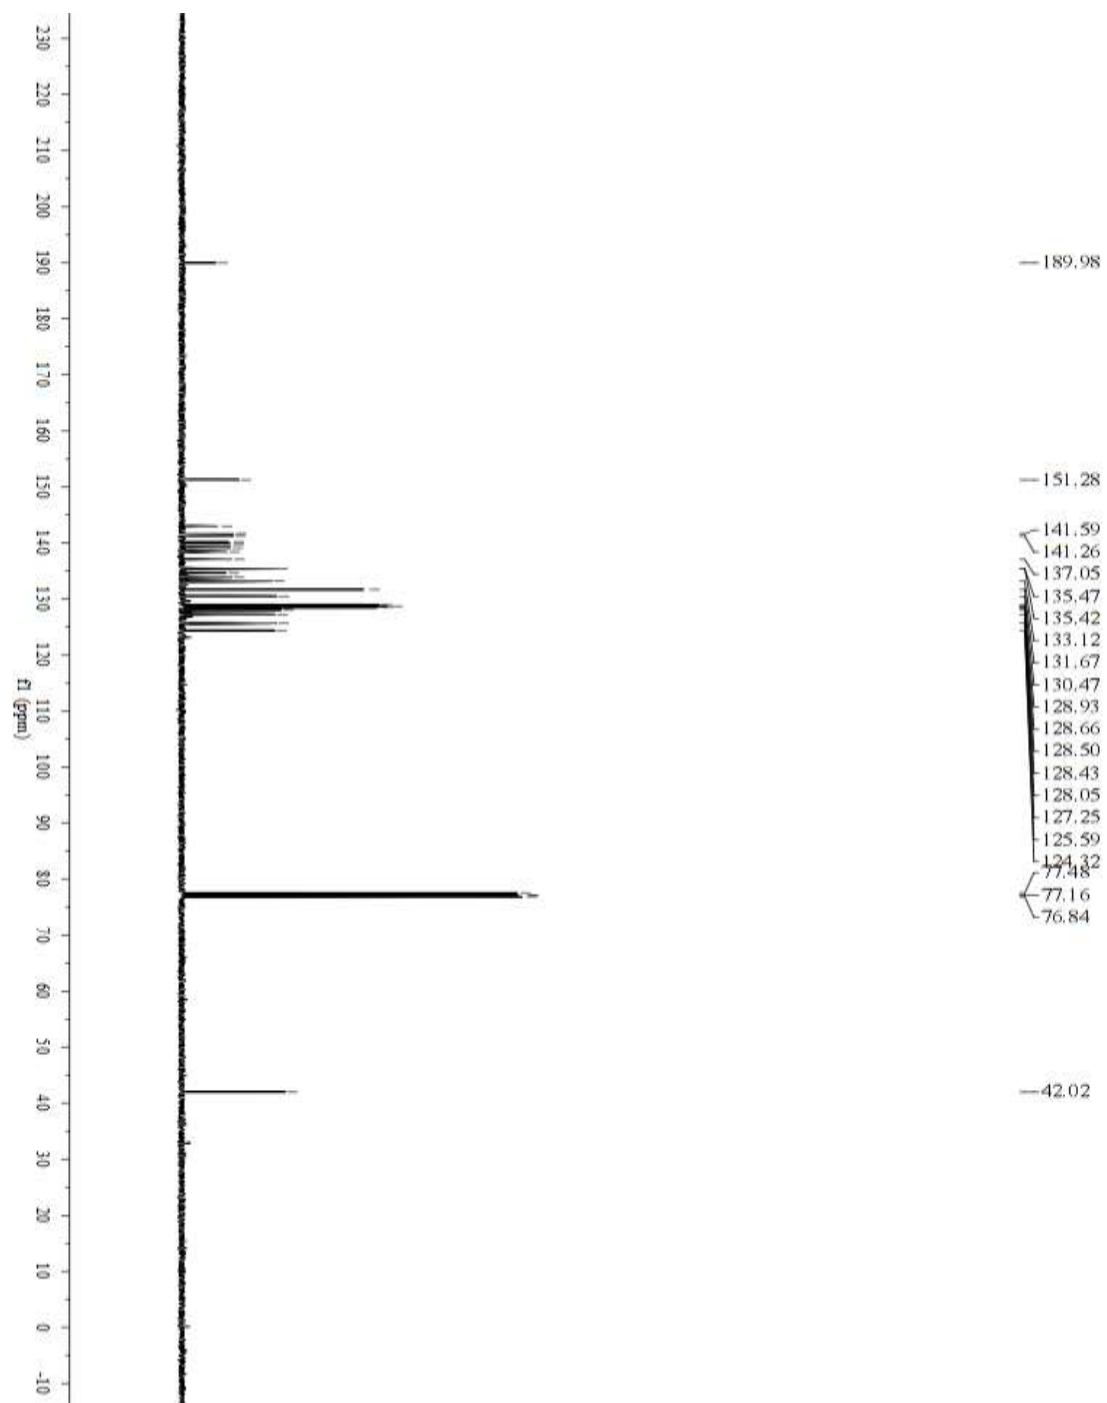

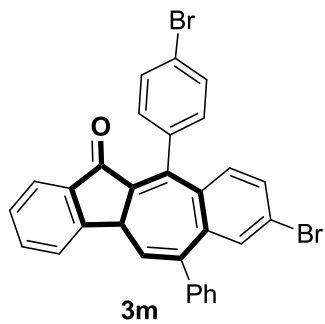

$^1\text{H NMR}$  (400 MHz,  $\text{CDCl}_3$ )

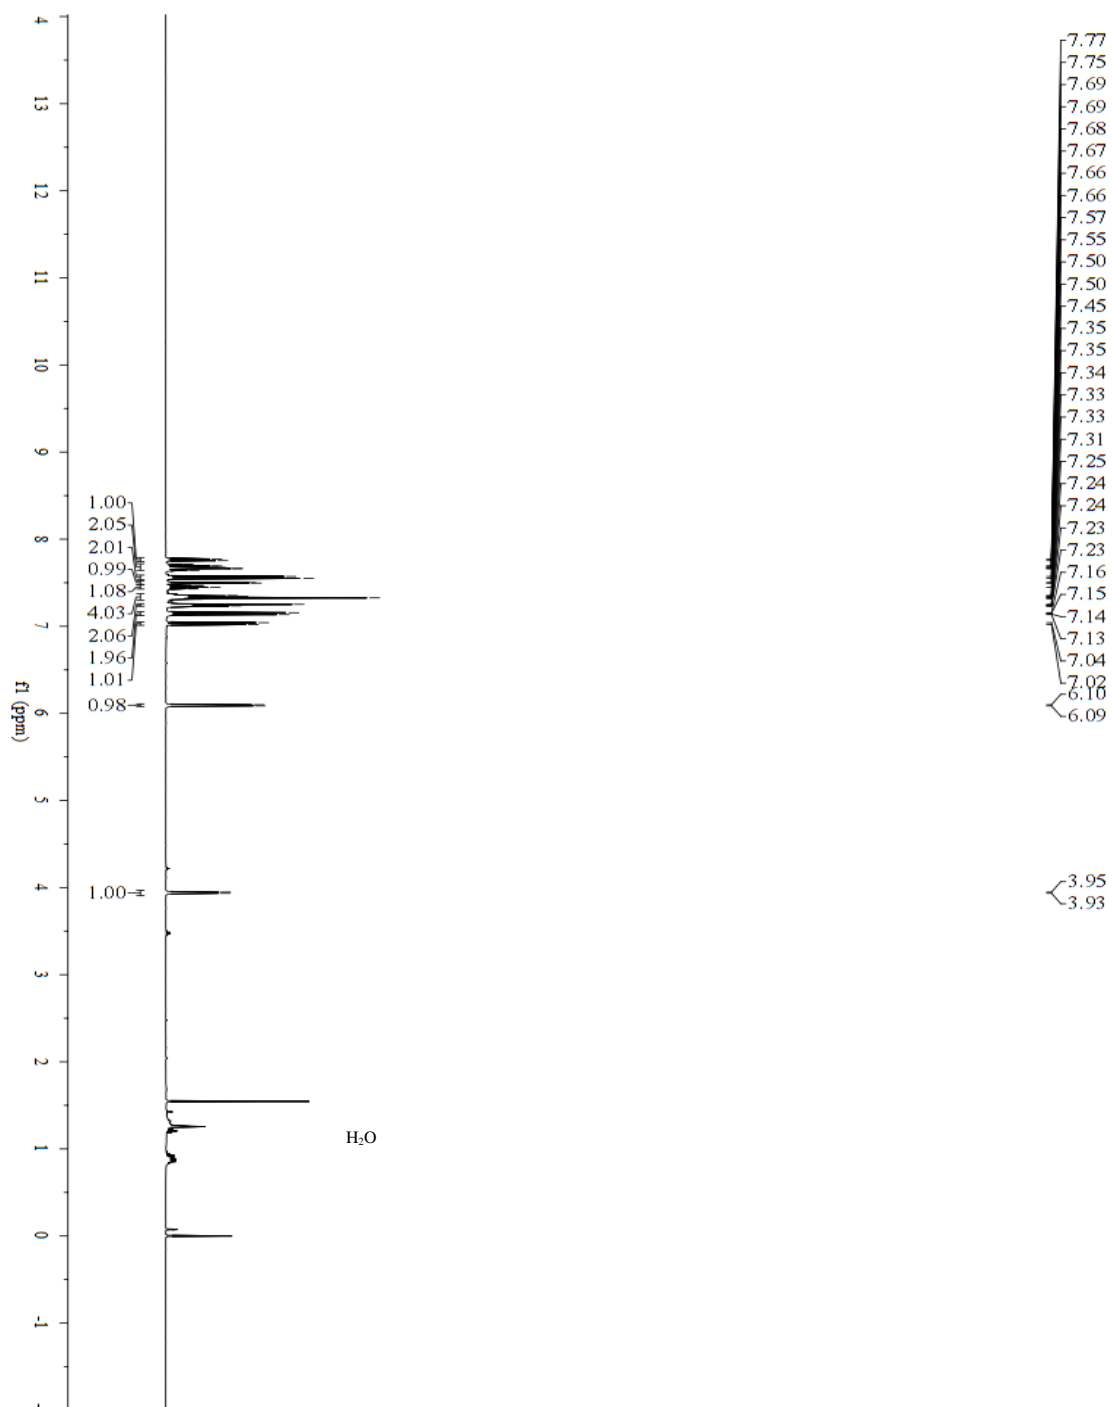

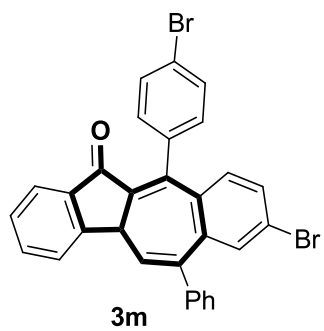

$^{13}\text{C}$  NMR (100 MHz,  $\text{CDCl}_3$ )

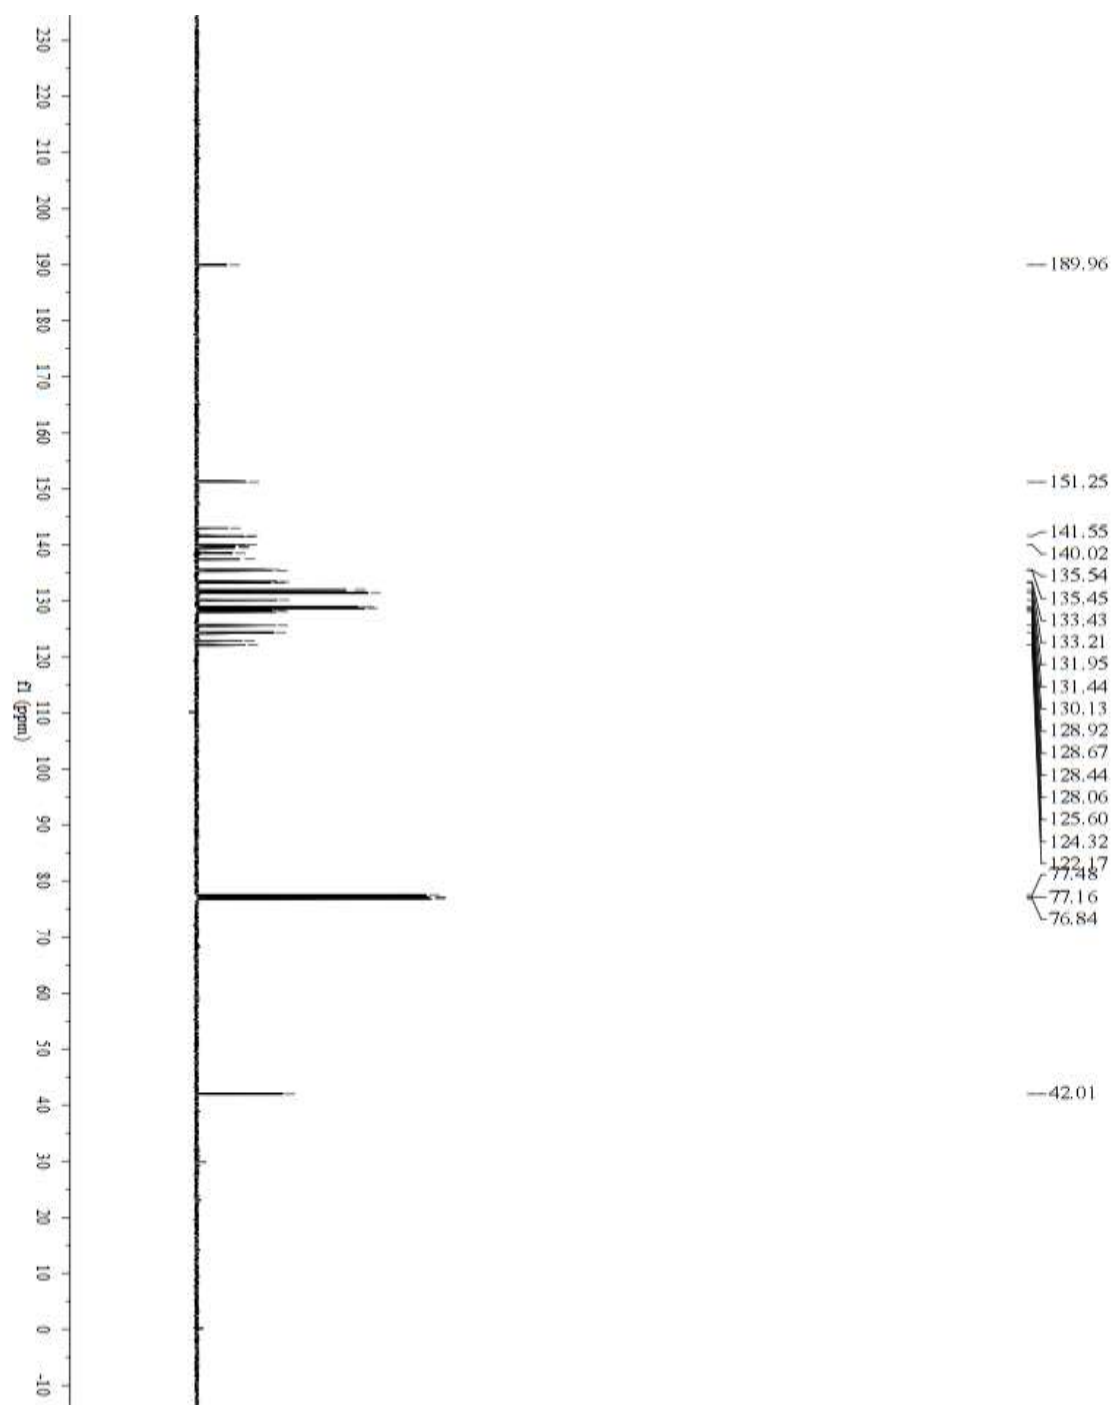

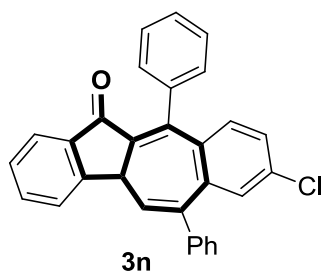

<sup>1</sup>H NMR (400 MHz, CDCl<sub>3</sub>)

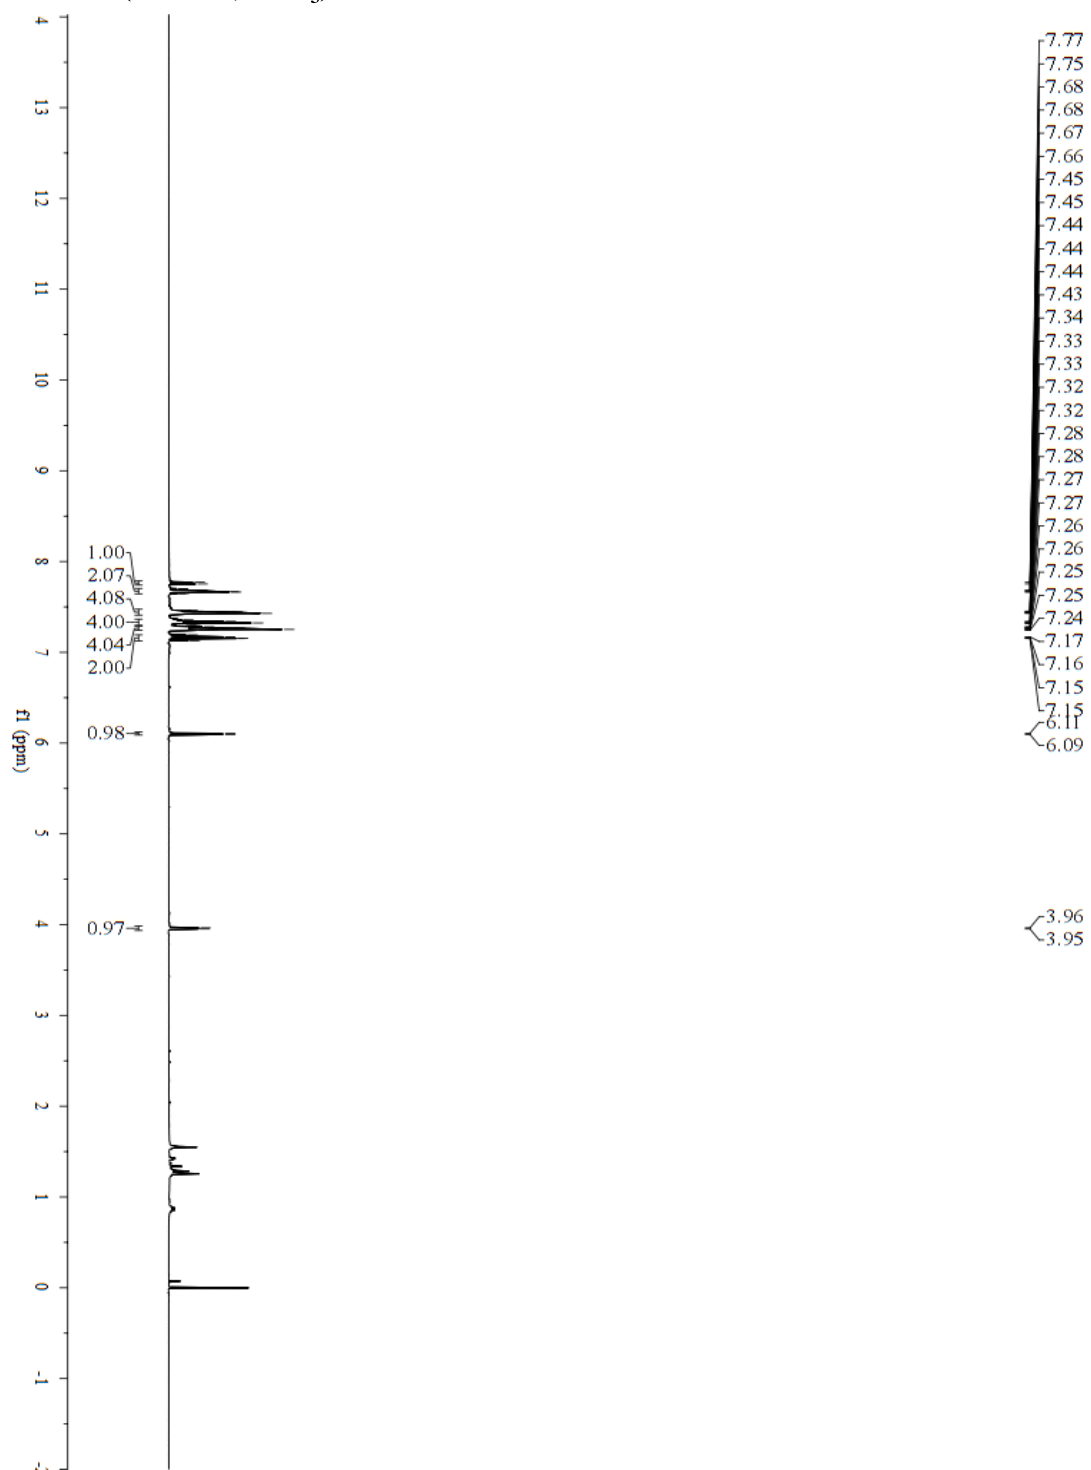

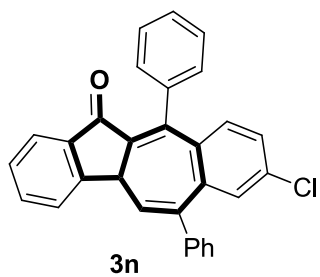

$^{13}\text{C}$  NMR (100 MHz,  $\text{CDCl}_3$ )

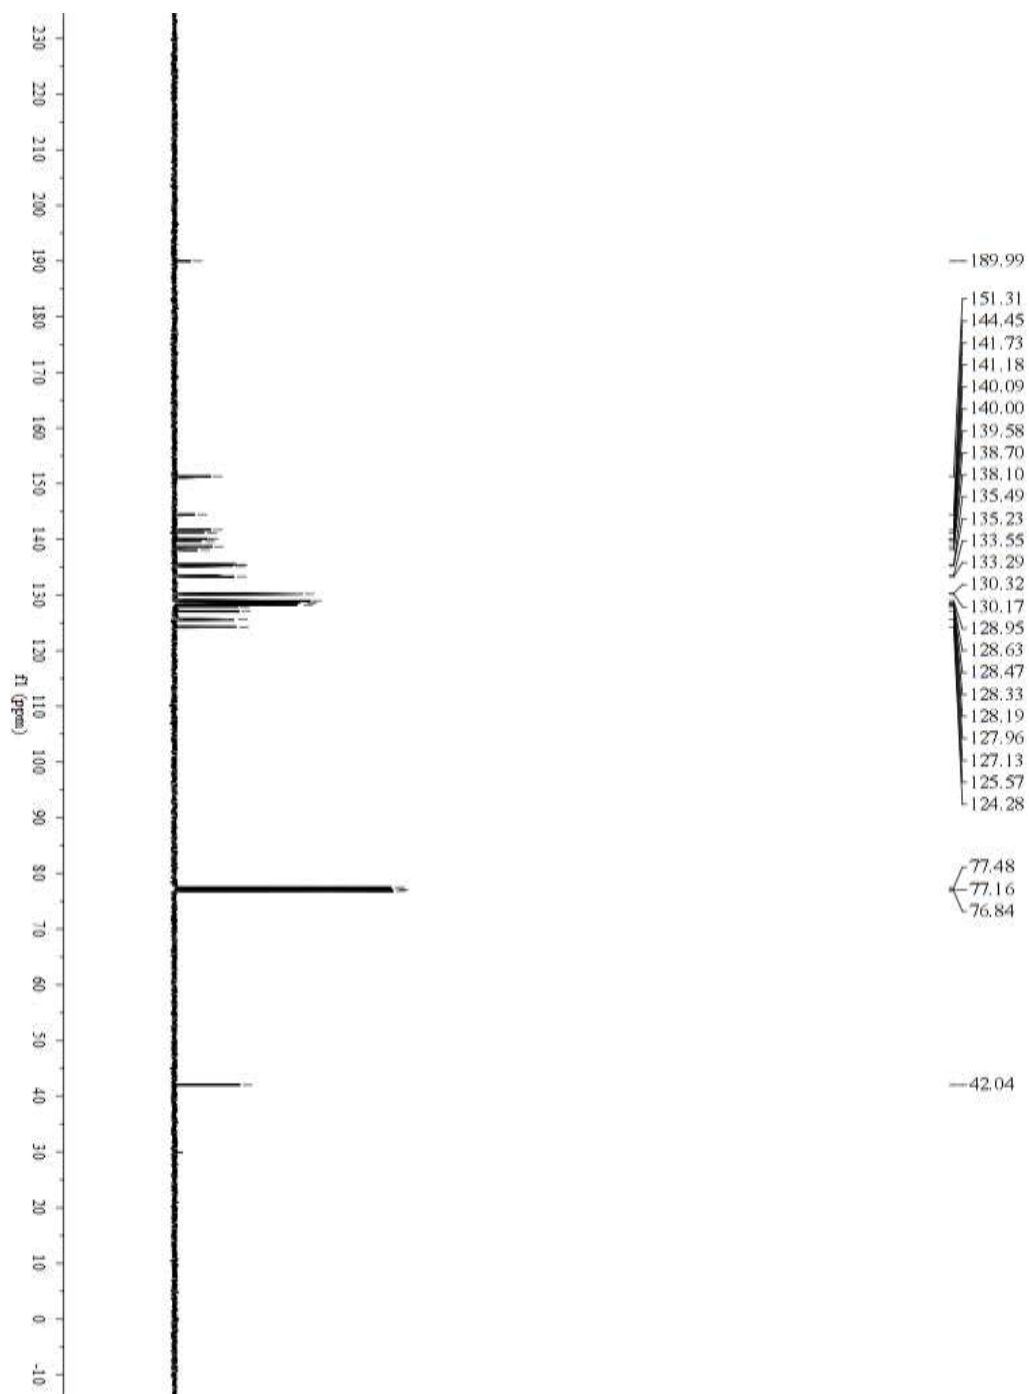

### 3n-DEPT

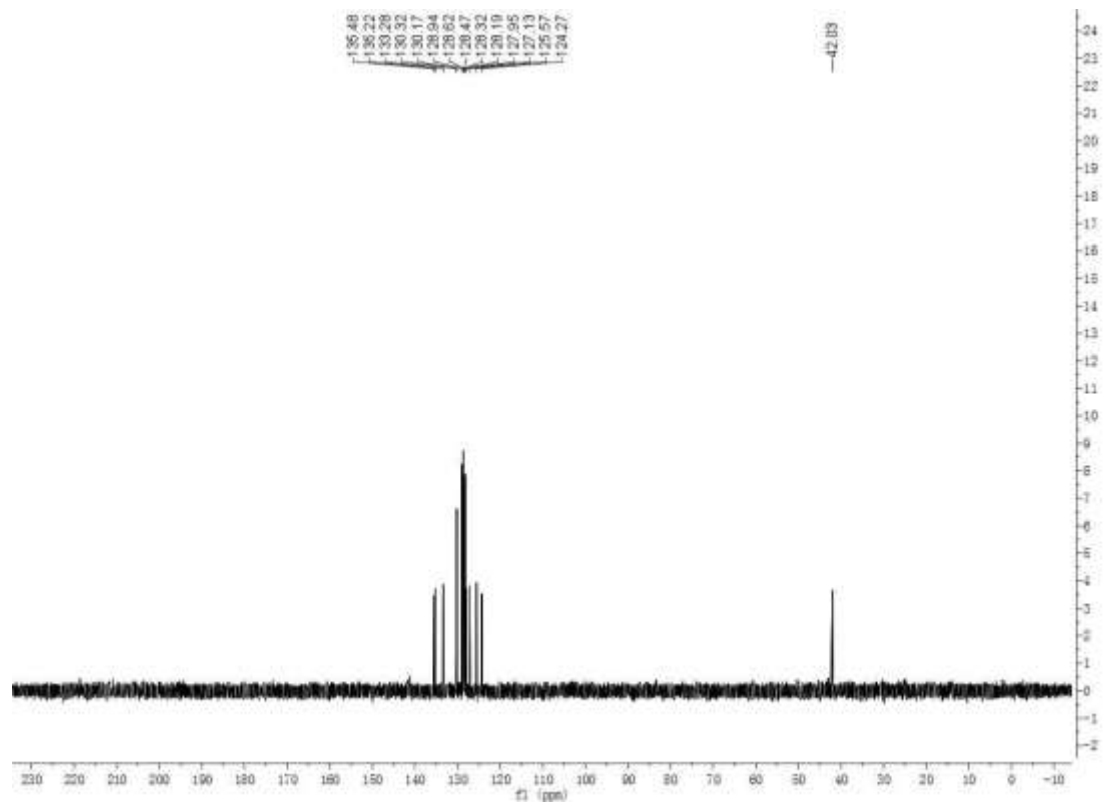

### 3n- <sup>1</sup>H-<sup>1</sup>H COSY

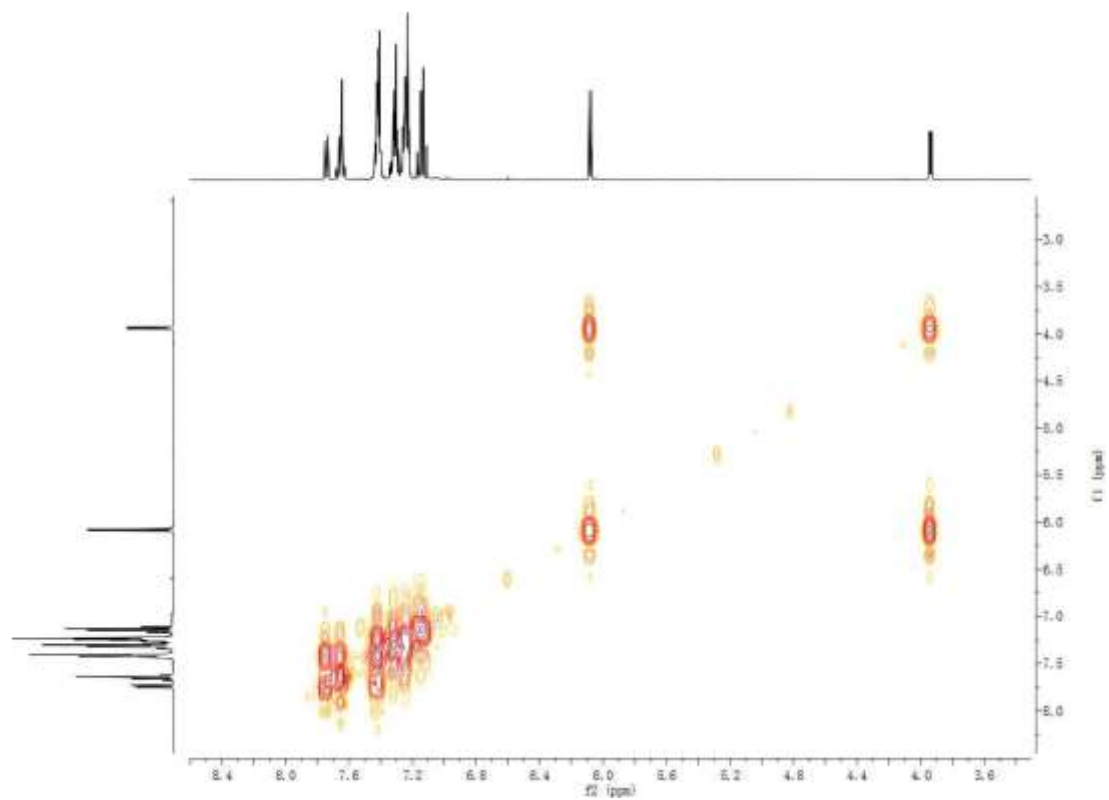

### 3n- HMBC

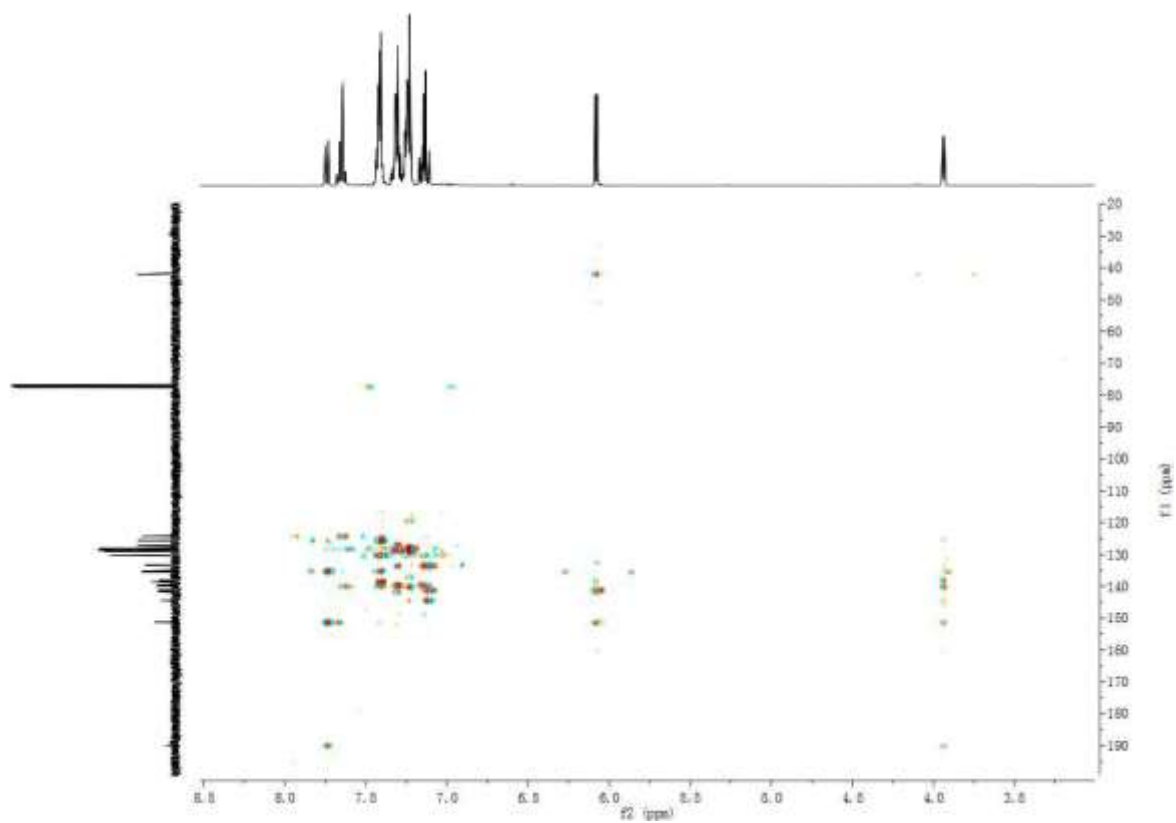

### 3n- HSQC

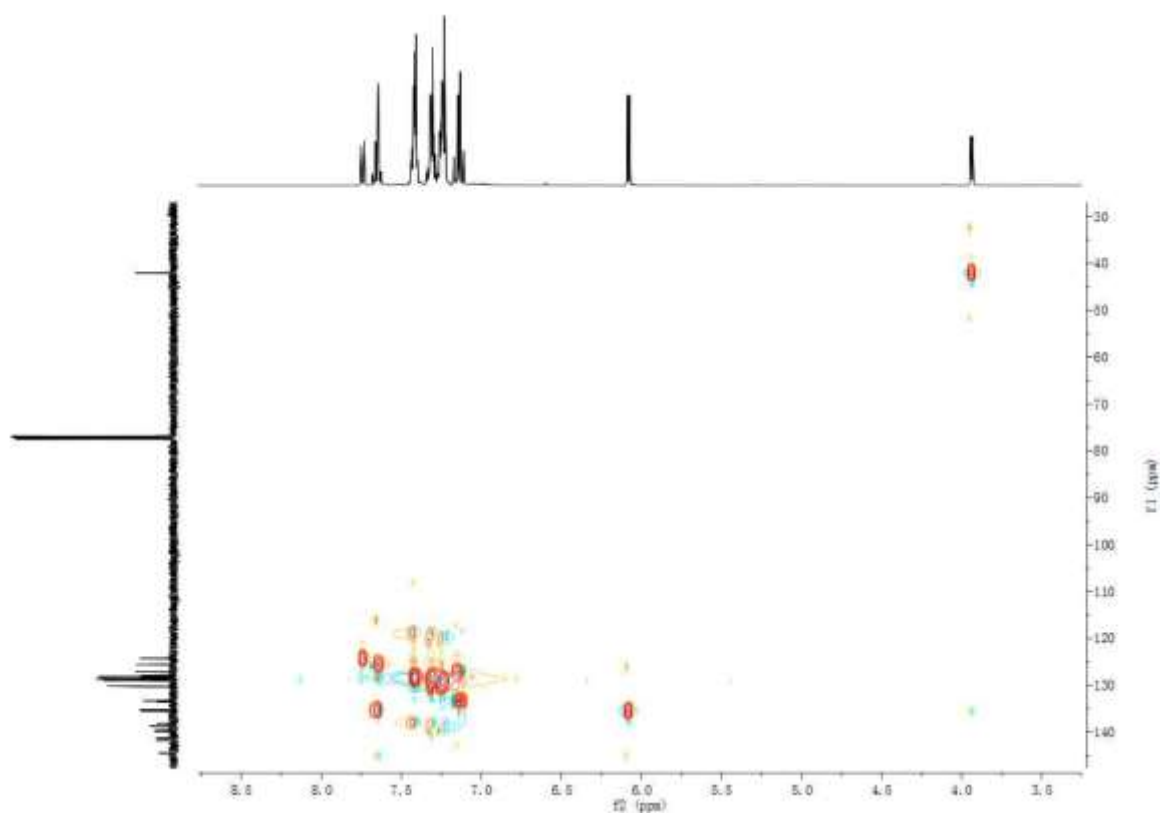



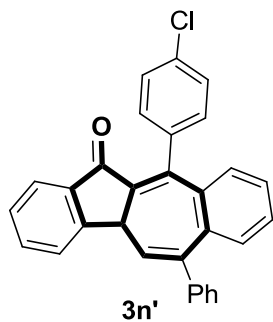

$^1\text{H NMR}$  (400 MHz,  $\text{CDCl}_3$ )

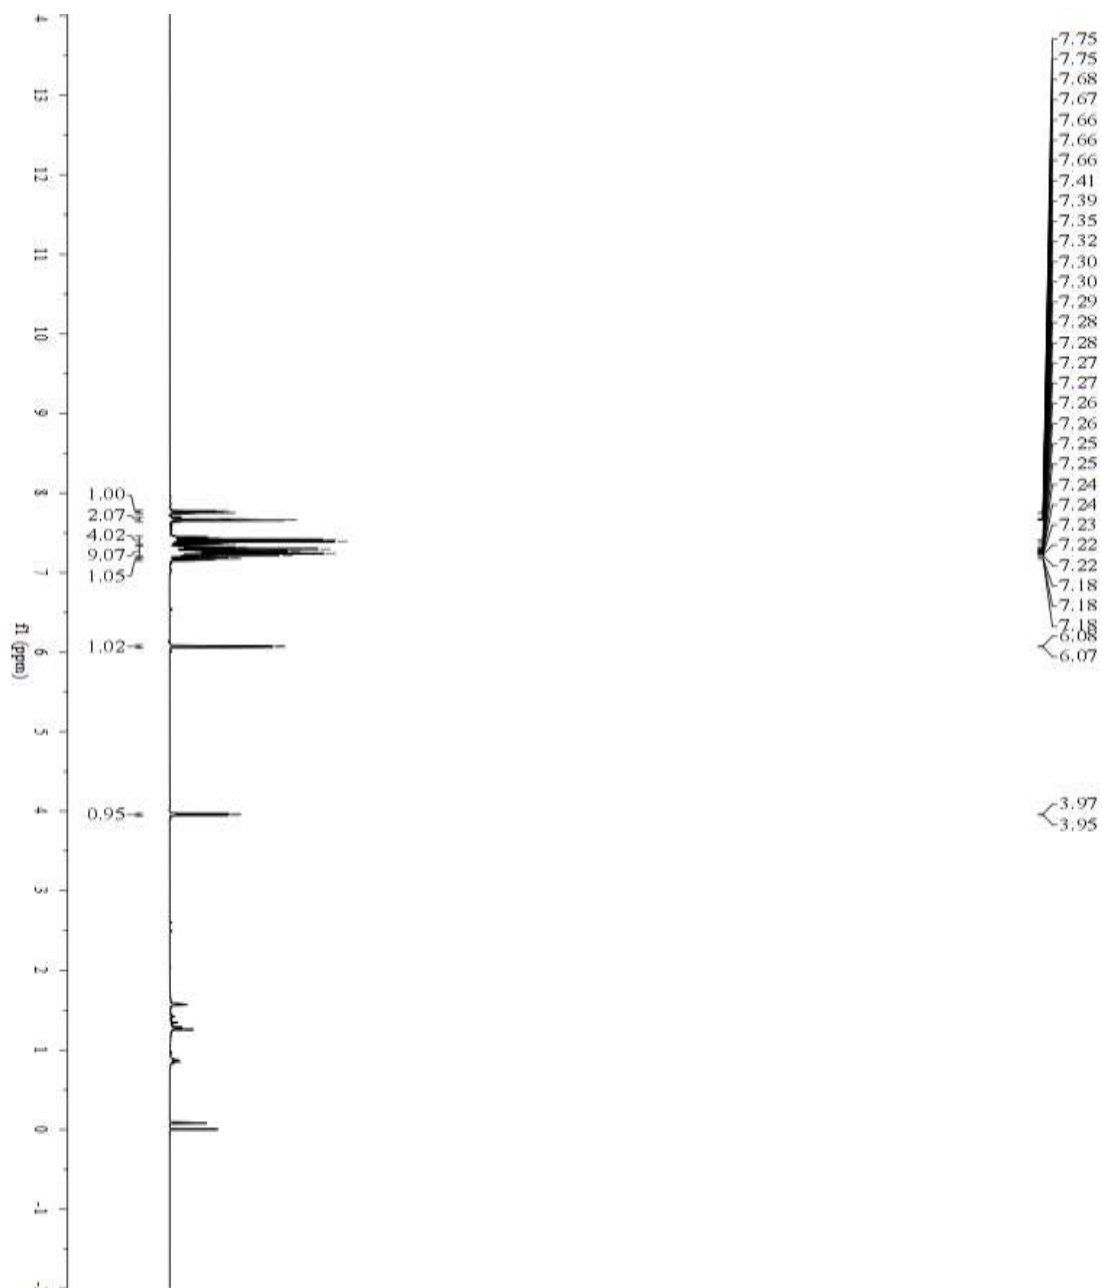

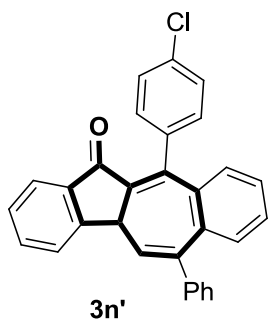

$^{13}\text{C}$  NMR (100 MHz,  $\text{CDCl}_3$ )

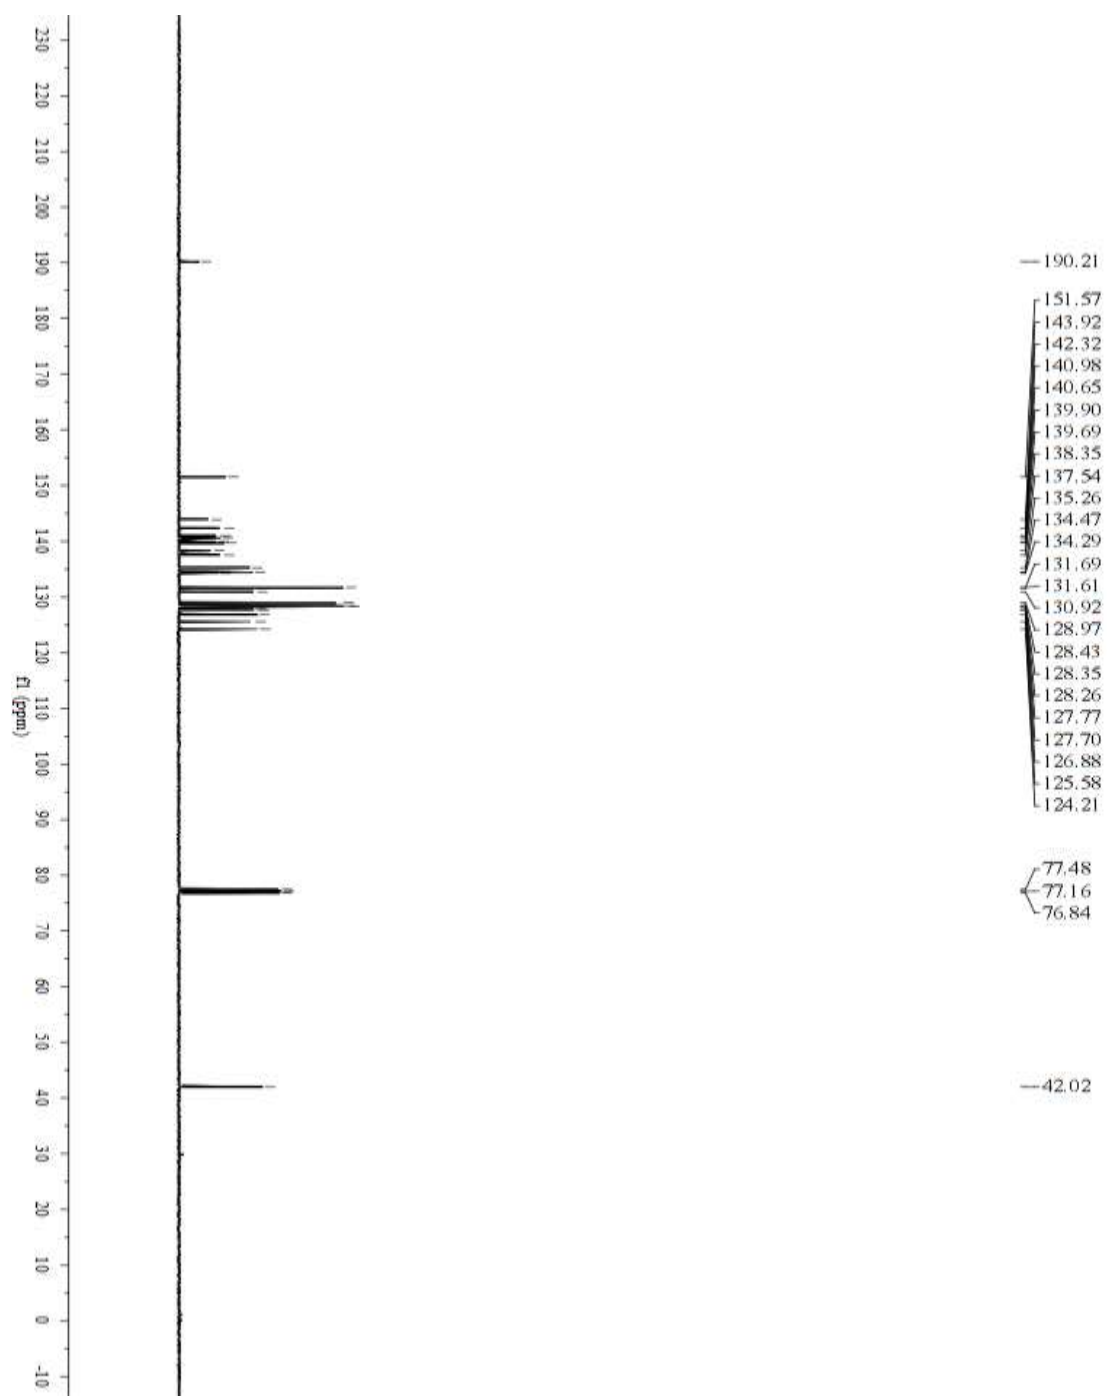

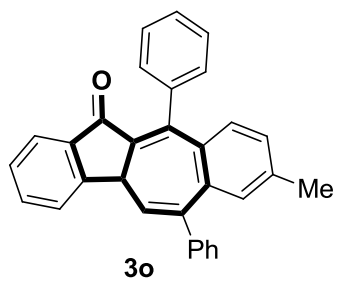

<sup>1</sup>H NMR (400 MHz, CDCl<sub>3</sub>)

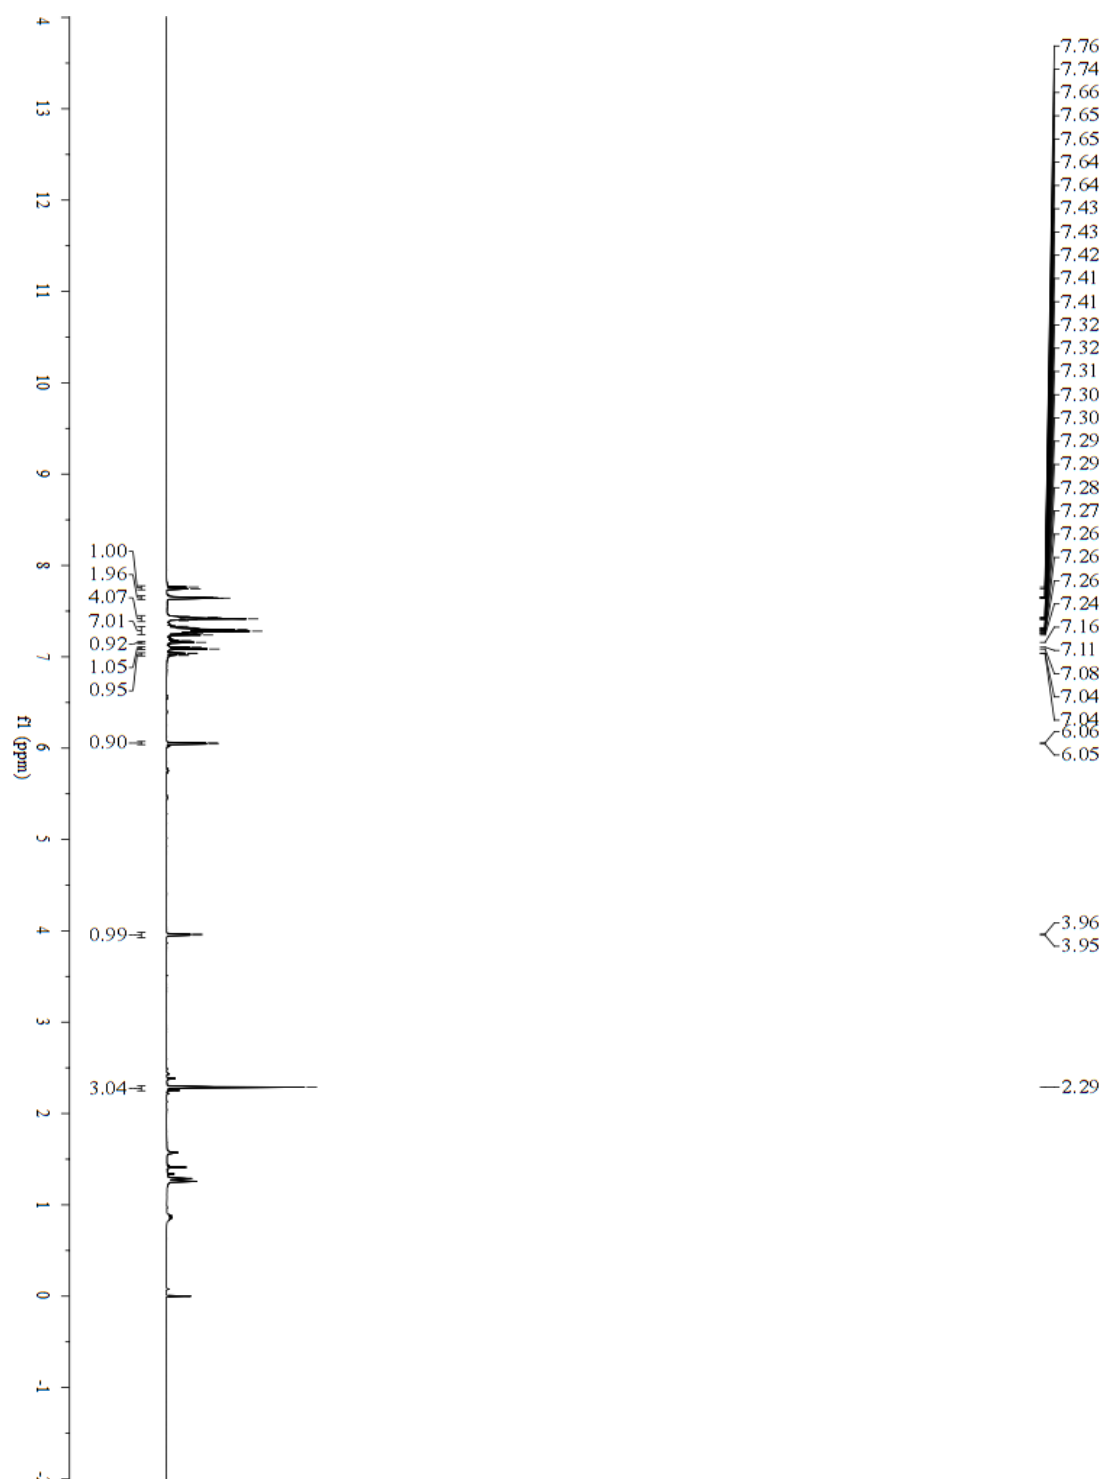

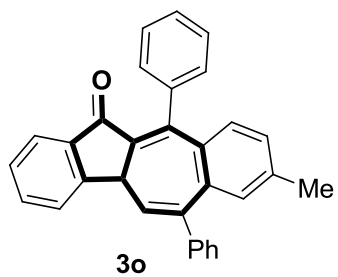

$^{13}\text{C}$  NMR (100 MHz,  $\text{CDCl}_3$ )

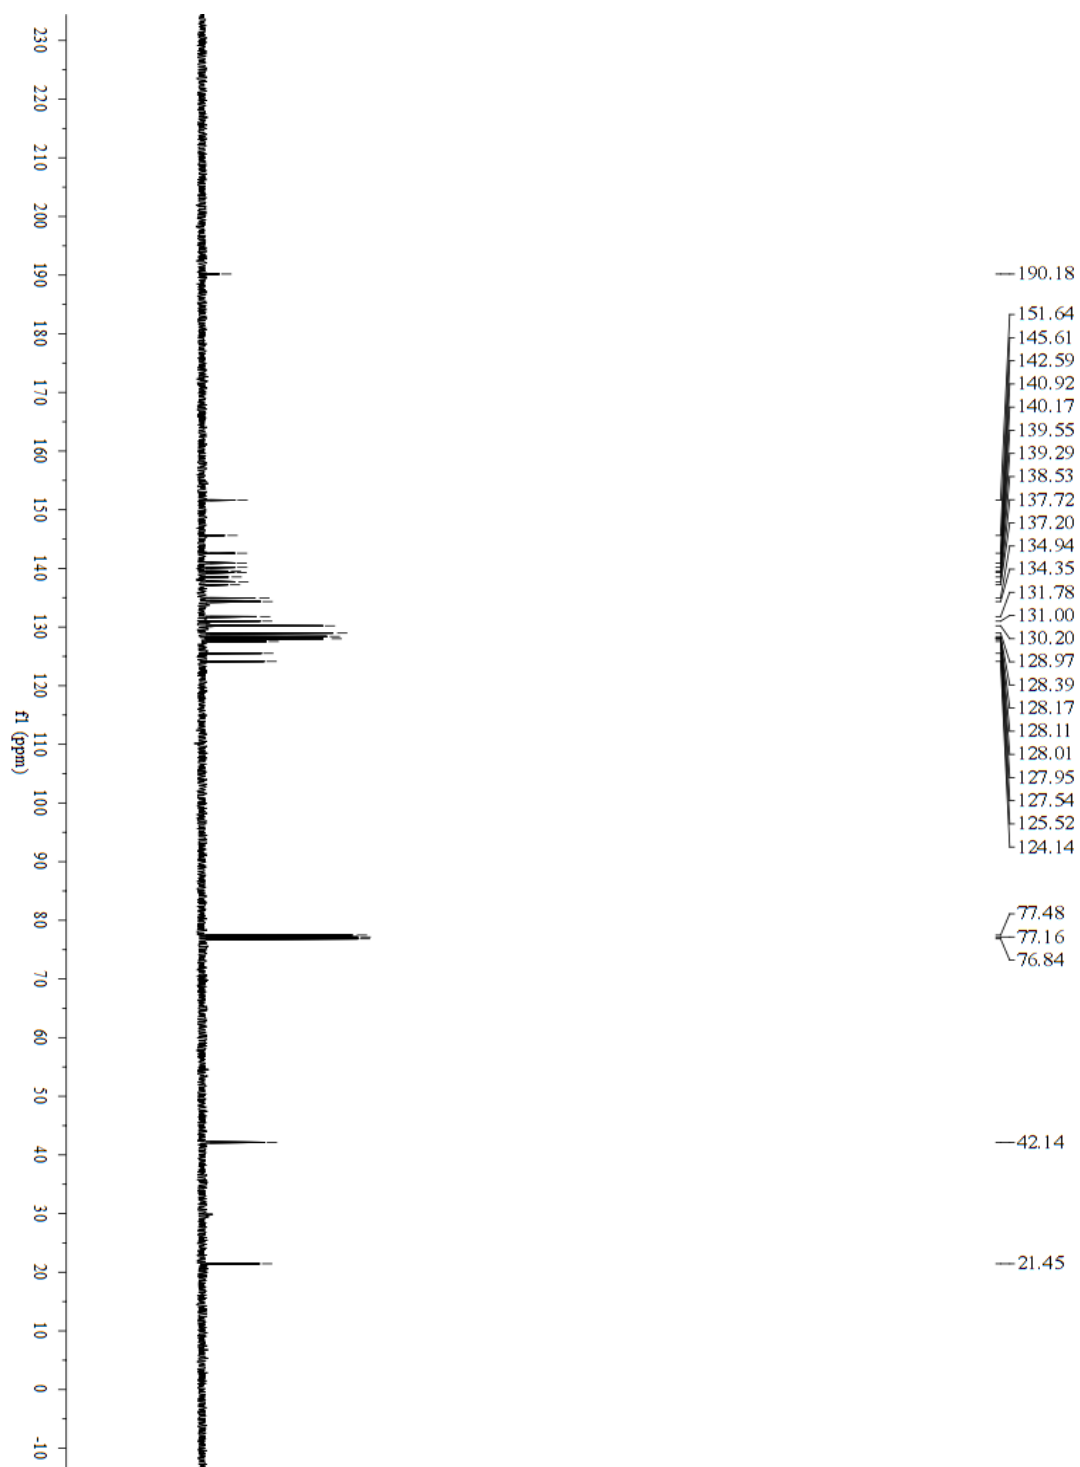

### 3o-DEPT

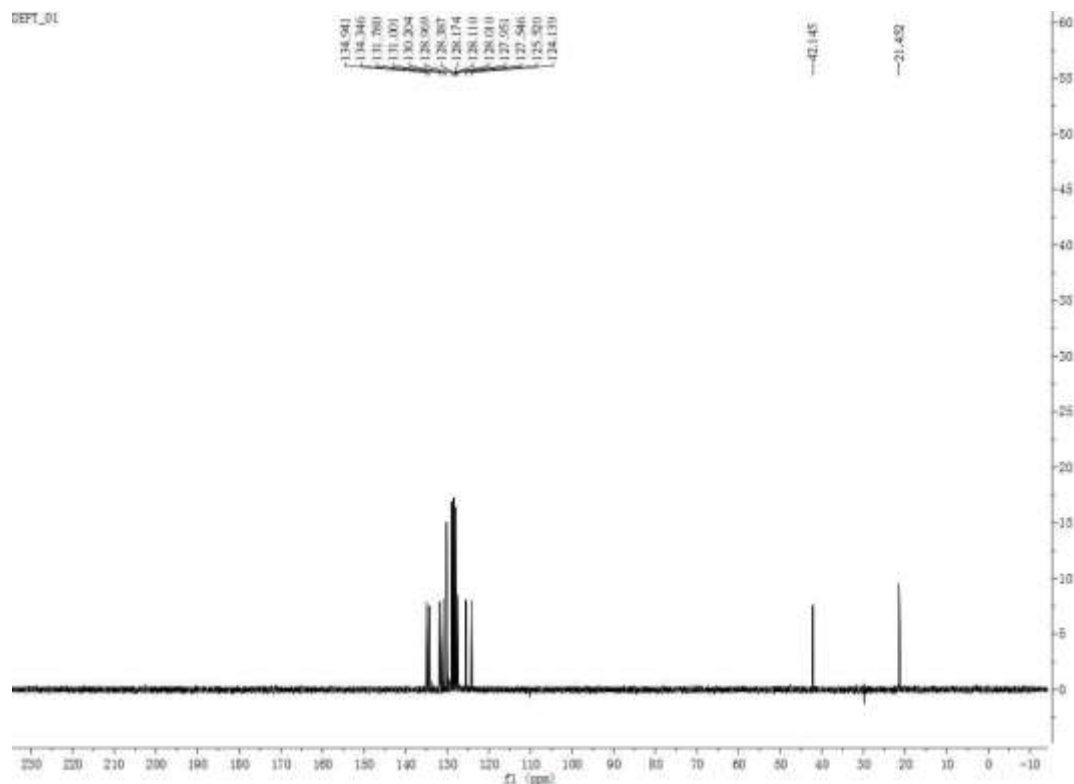

### 3o- <sup>1</sup>H-<sup>1</sup>H COSY

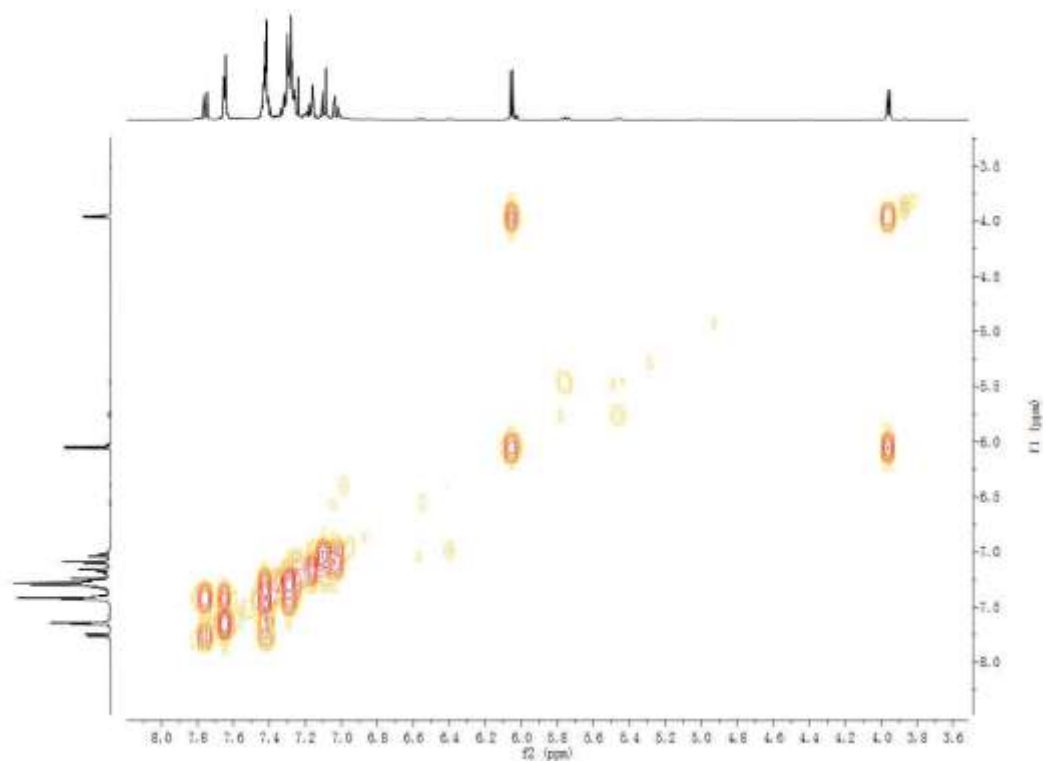

### 3o- HMBC

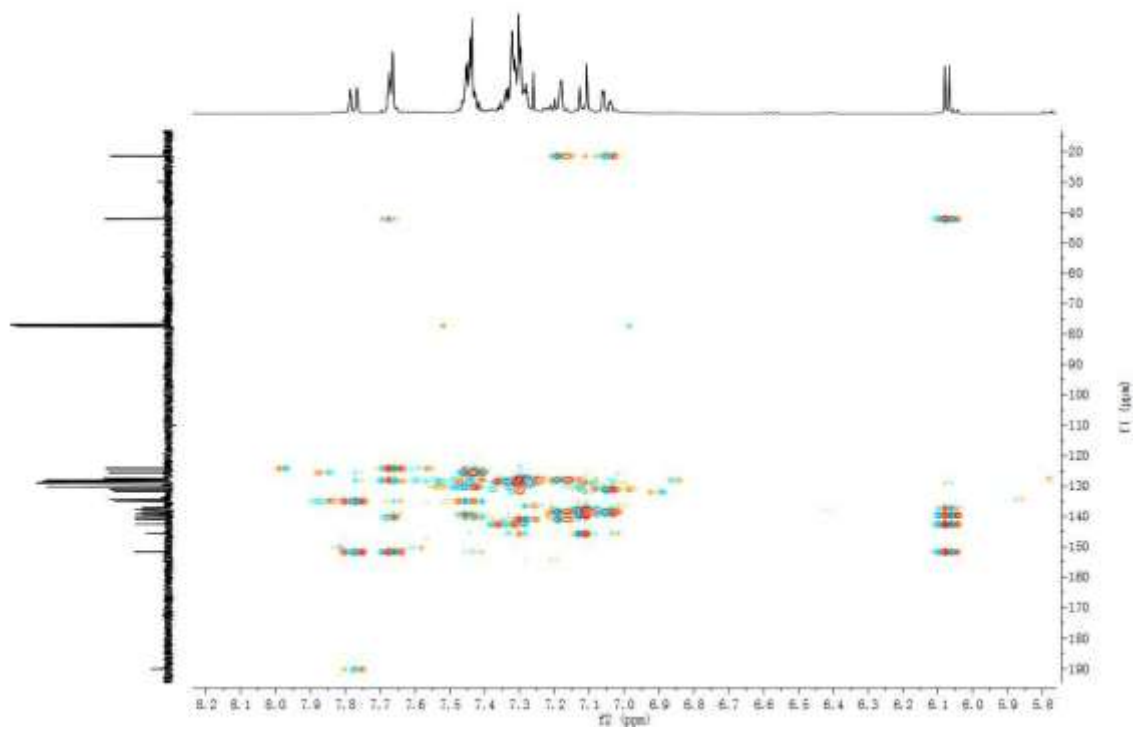

### 3o- HSQC

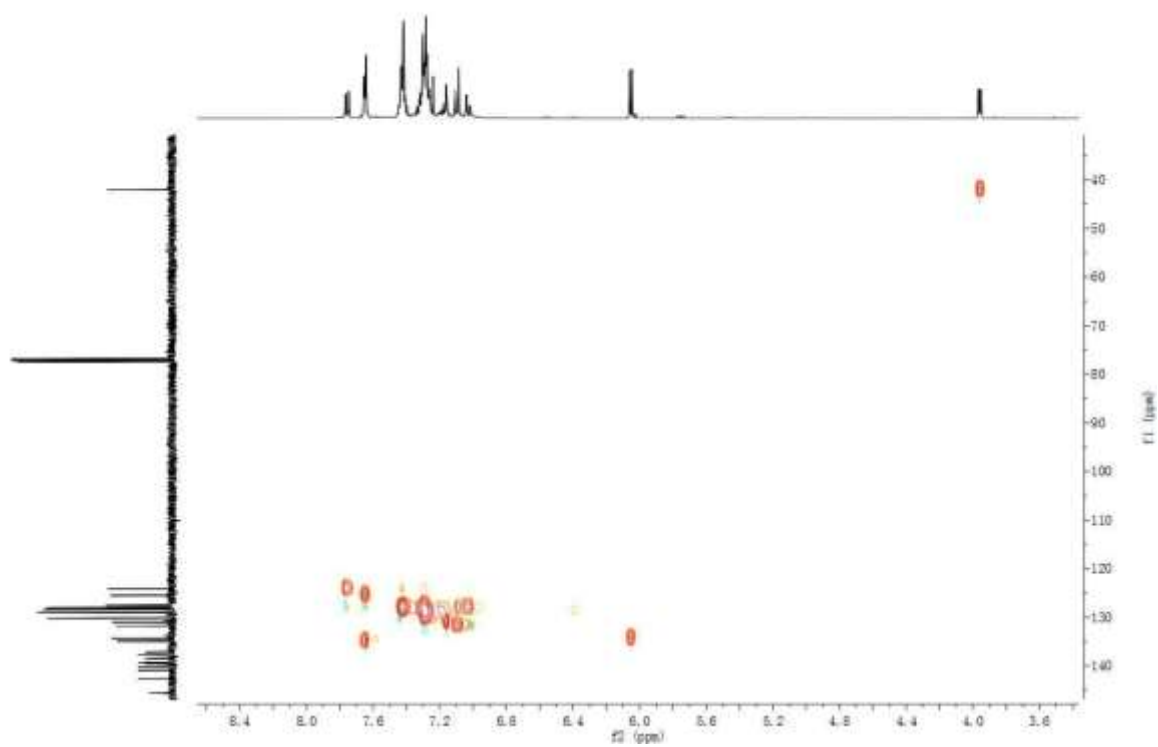

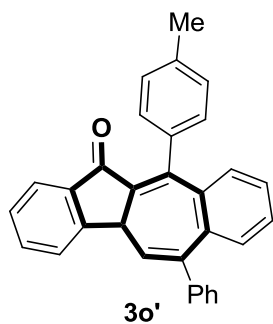

$^1\text{H NMR}$  (400 MHz,  $\text{CDCl}_3$ )

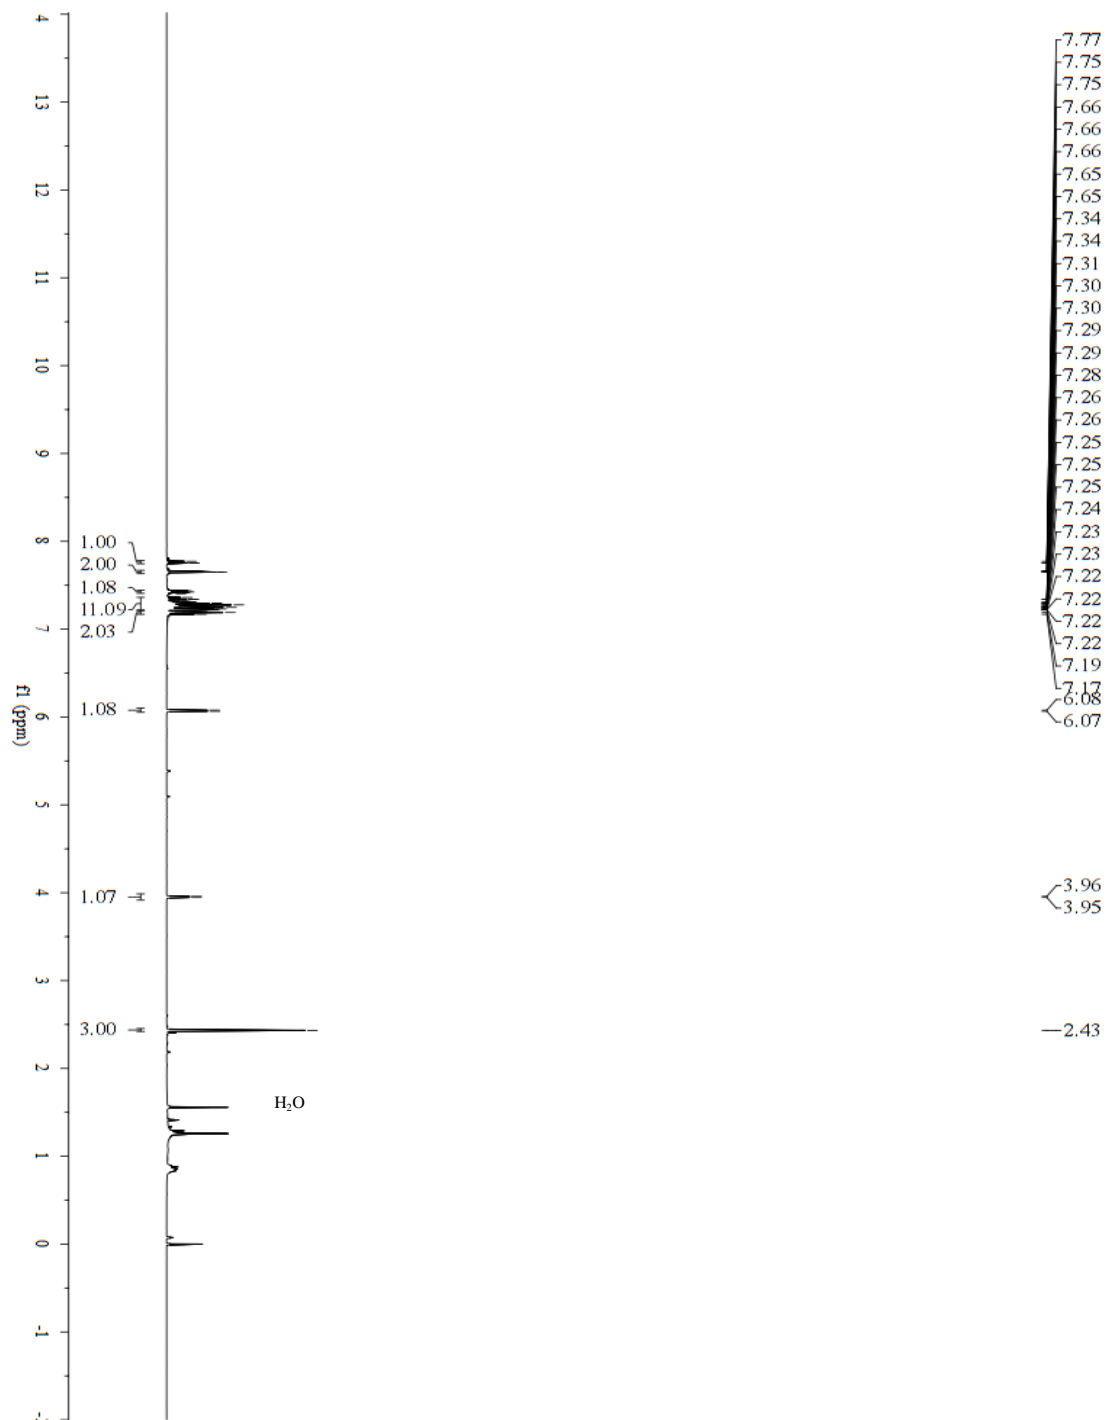

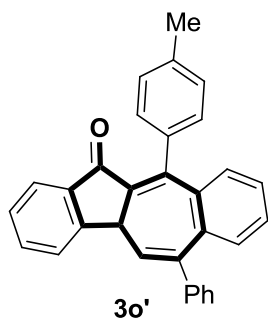

$^{13}\text{C}$  NMR (100 MHz,  $\text{CDCl}_3$ )

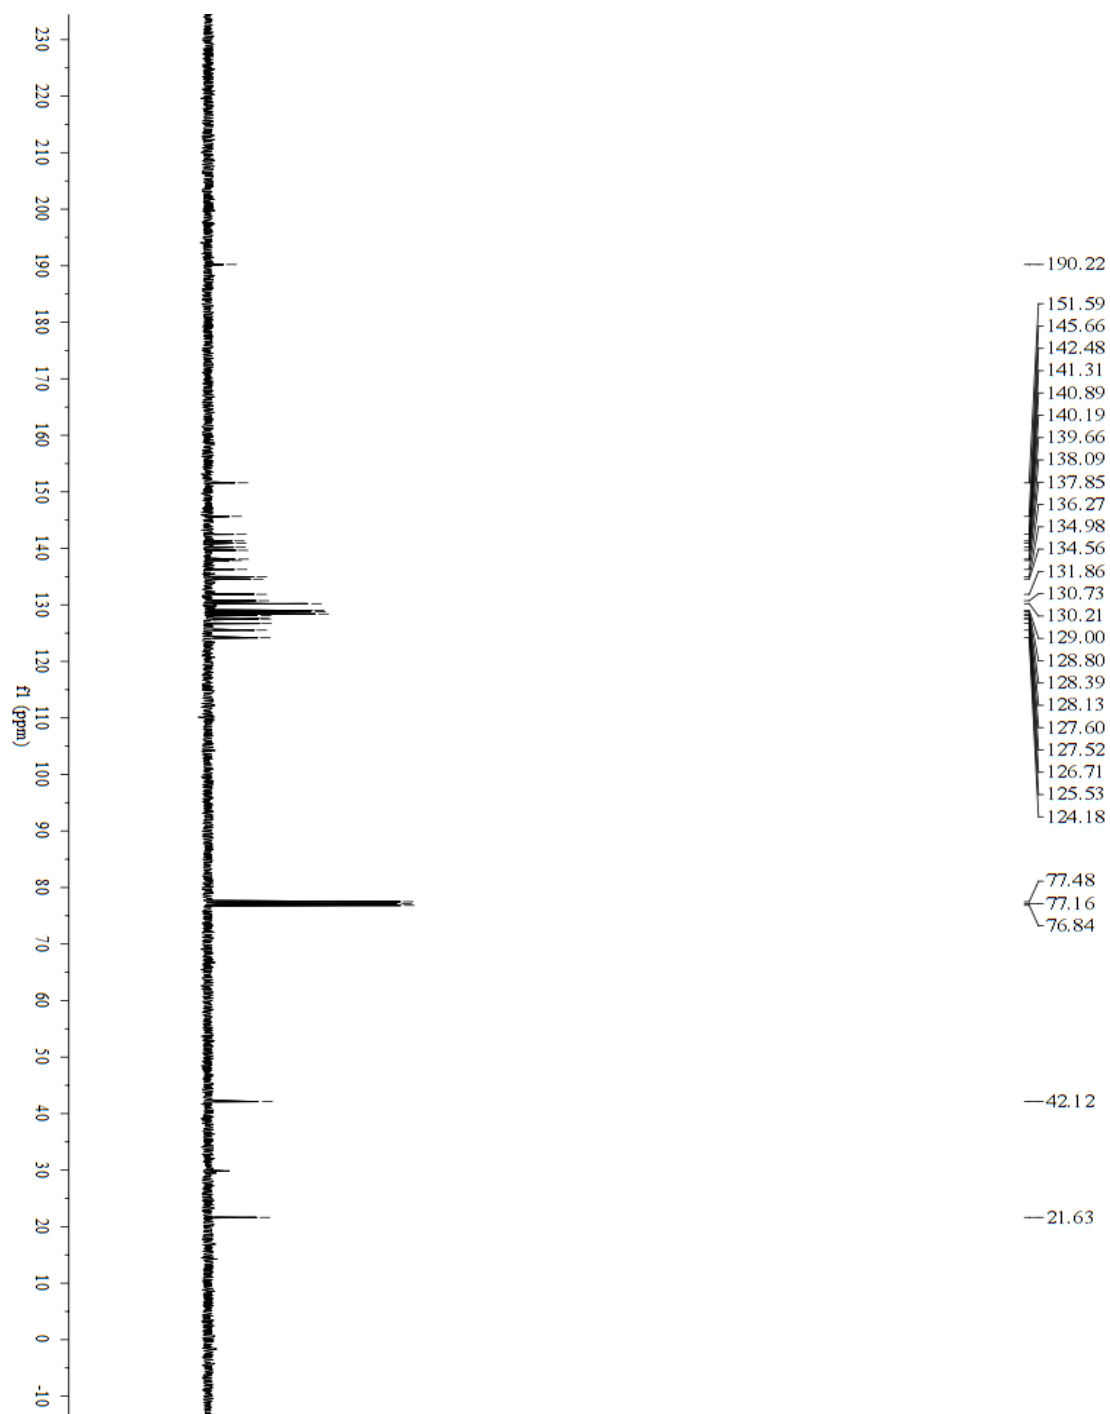



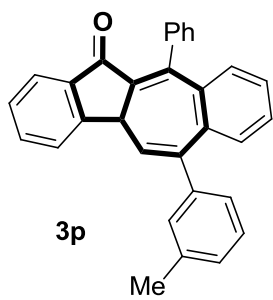

$^1\text{H NMR}$  (400 MHz,  $\text{CDCl}_3$ )

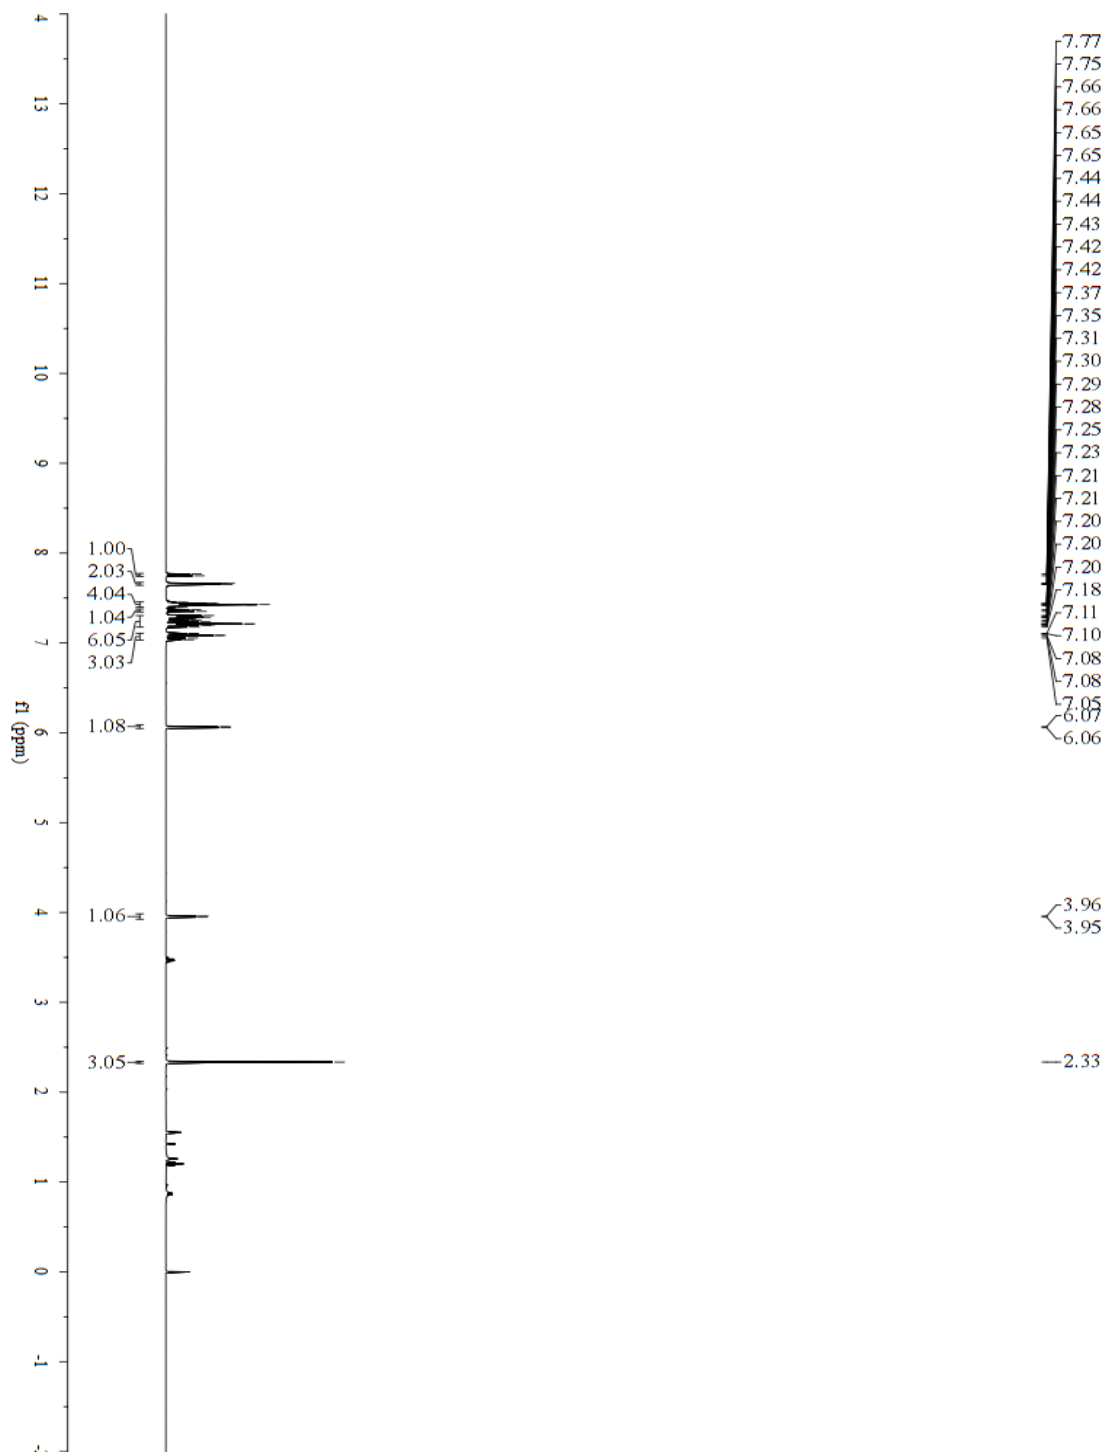

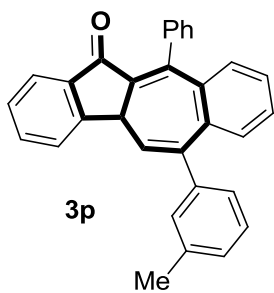

$^{13}\text{C}$  NMR (100 MHz,  $\text{CDCl}_3$ )

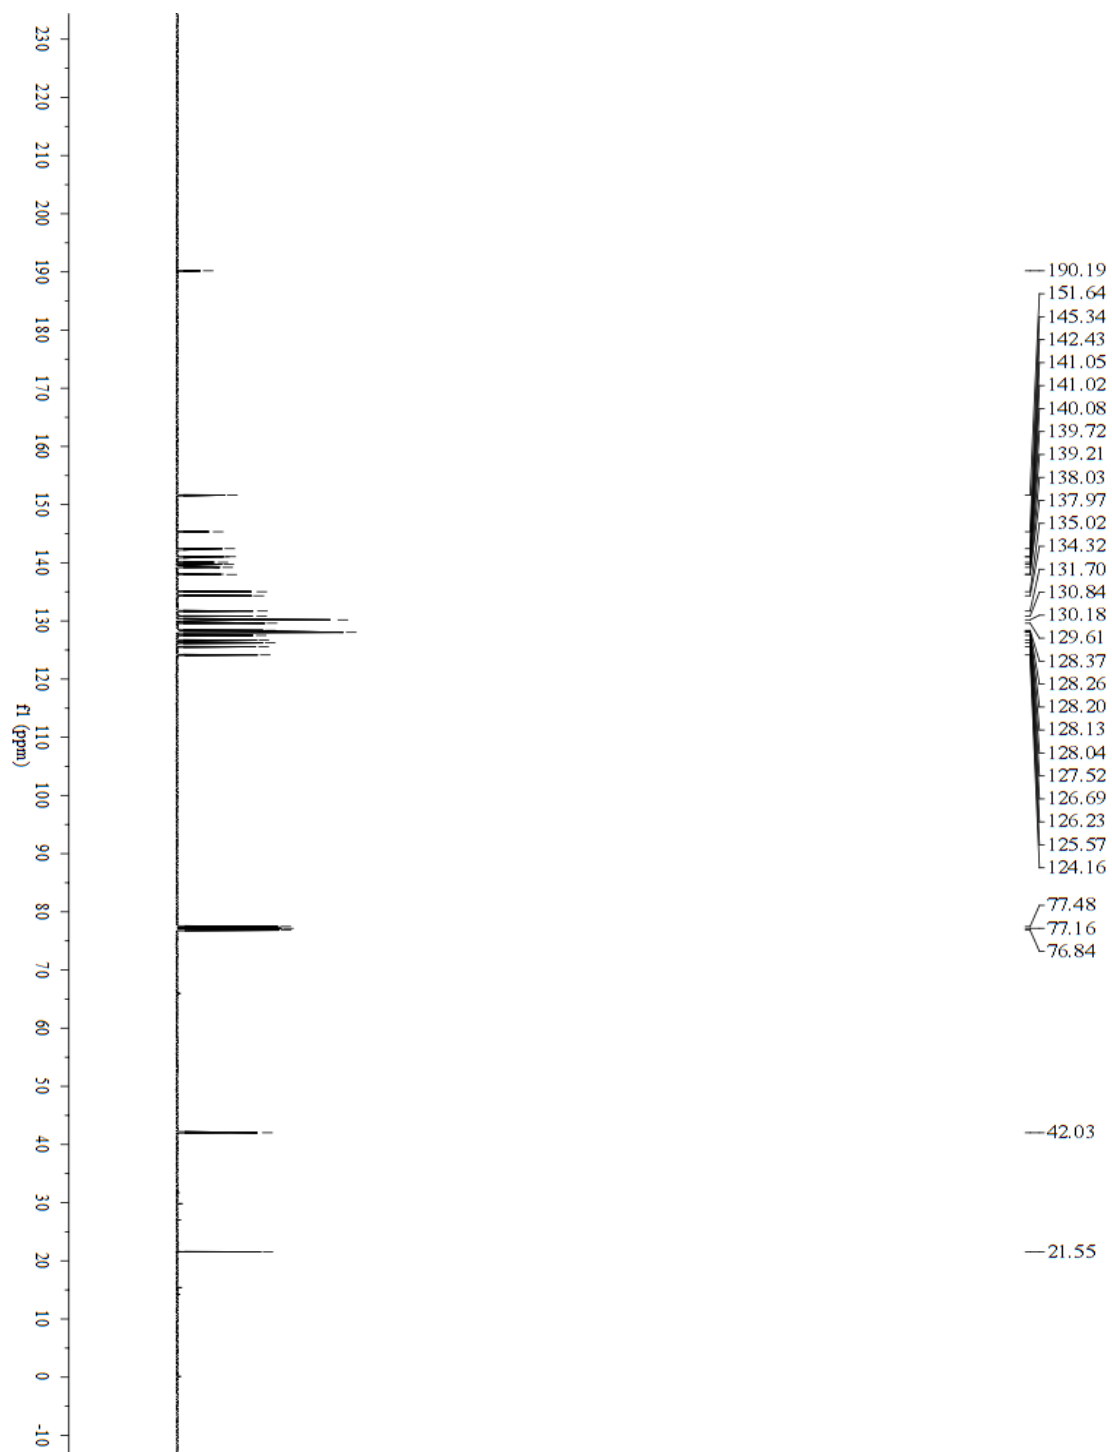

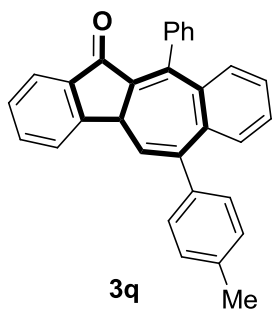

**<sup>1</sup>H NMR (400 MHz, CDCl<sub>3</sub>)**

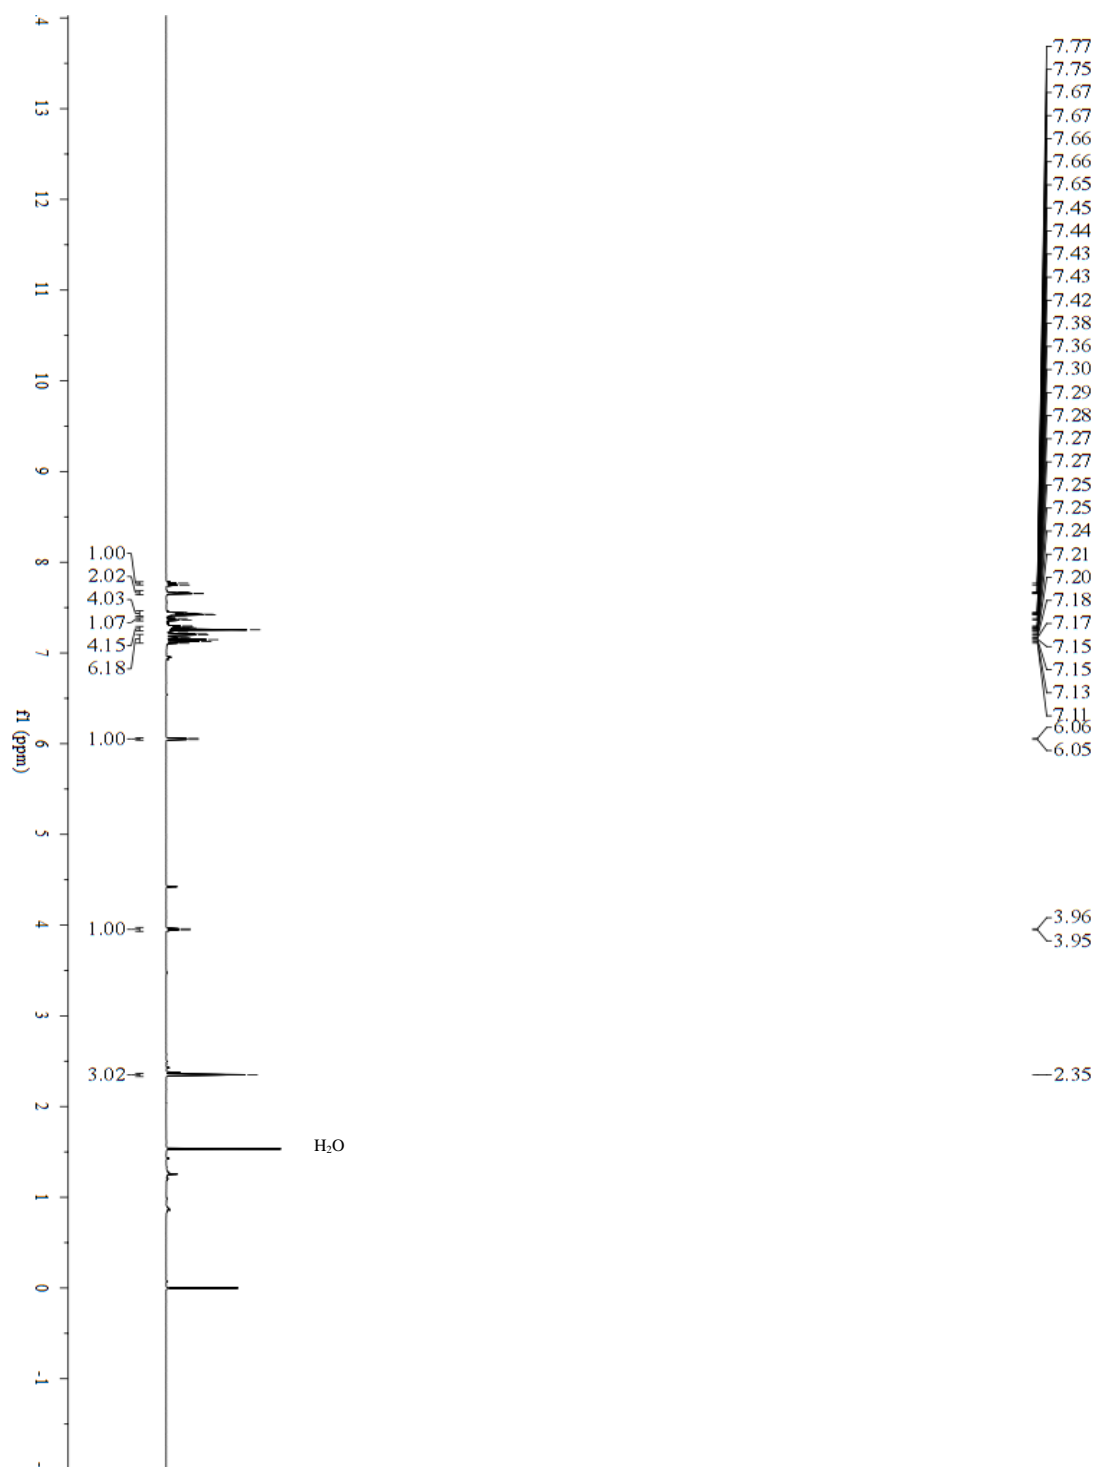

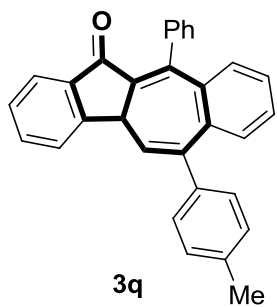

$^{13}\text{C}$  NMR (100 MHz,  $\text{CDCl}_3$ )

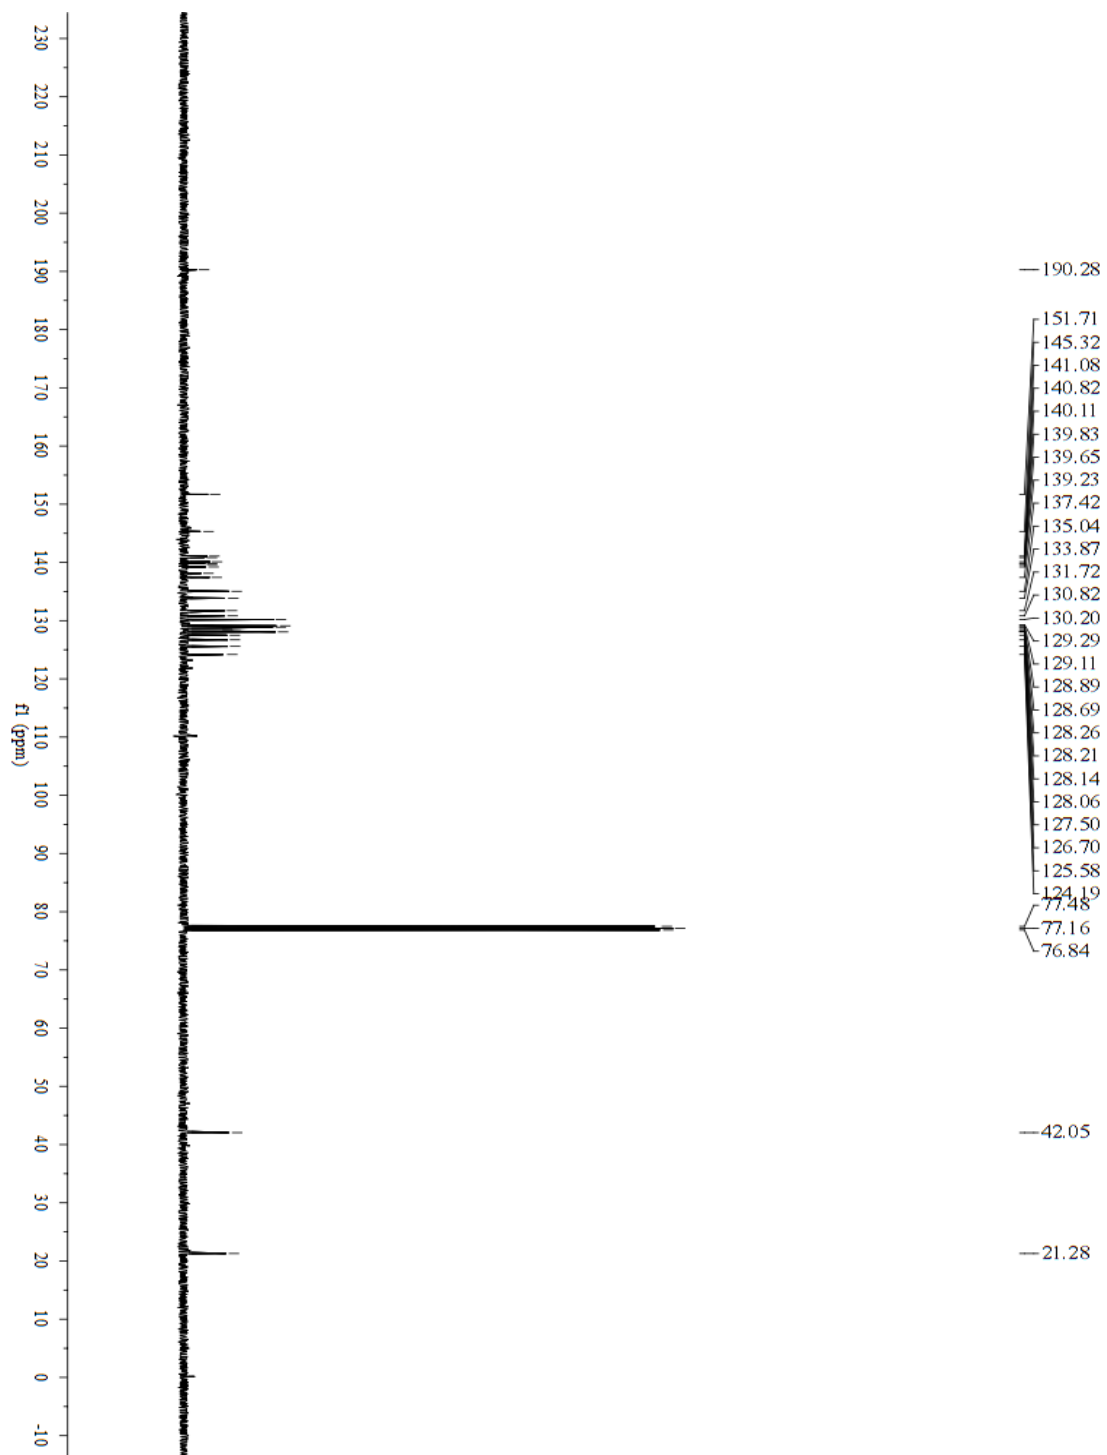

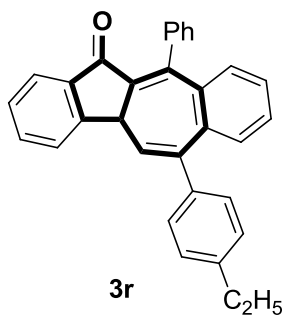

$^1\text{H NMR}$  (400 MHz,  $\text{CDCl}_3$ )

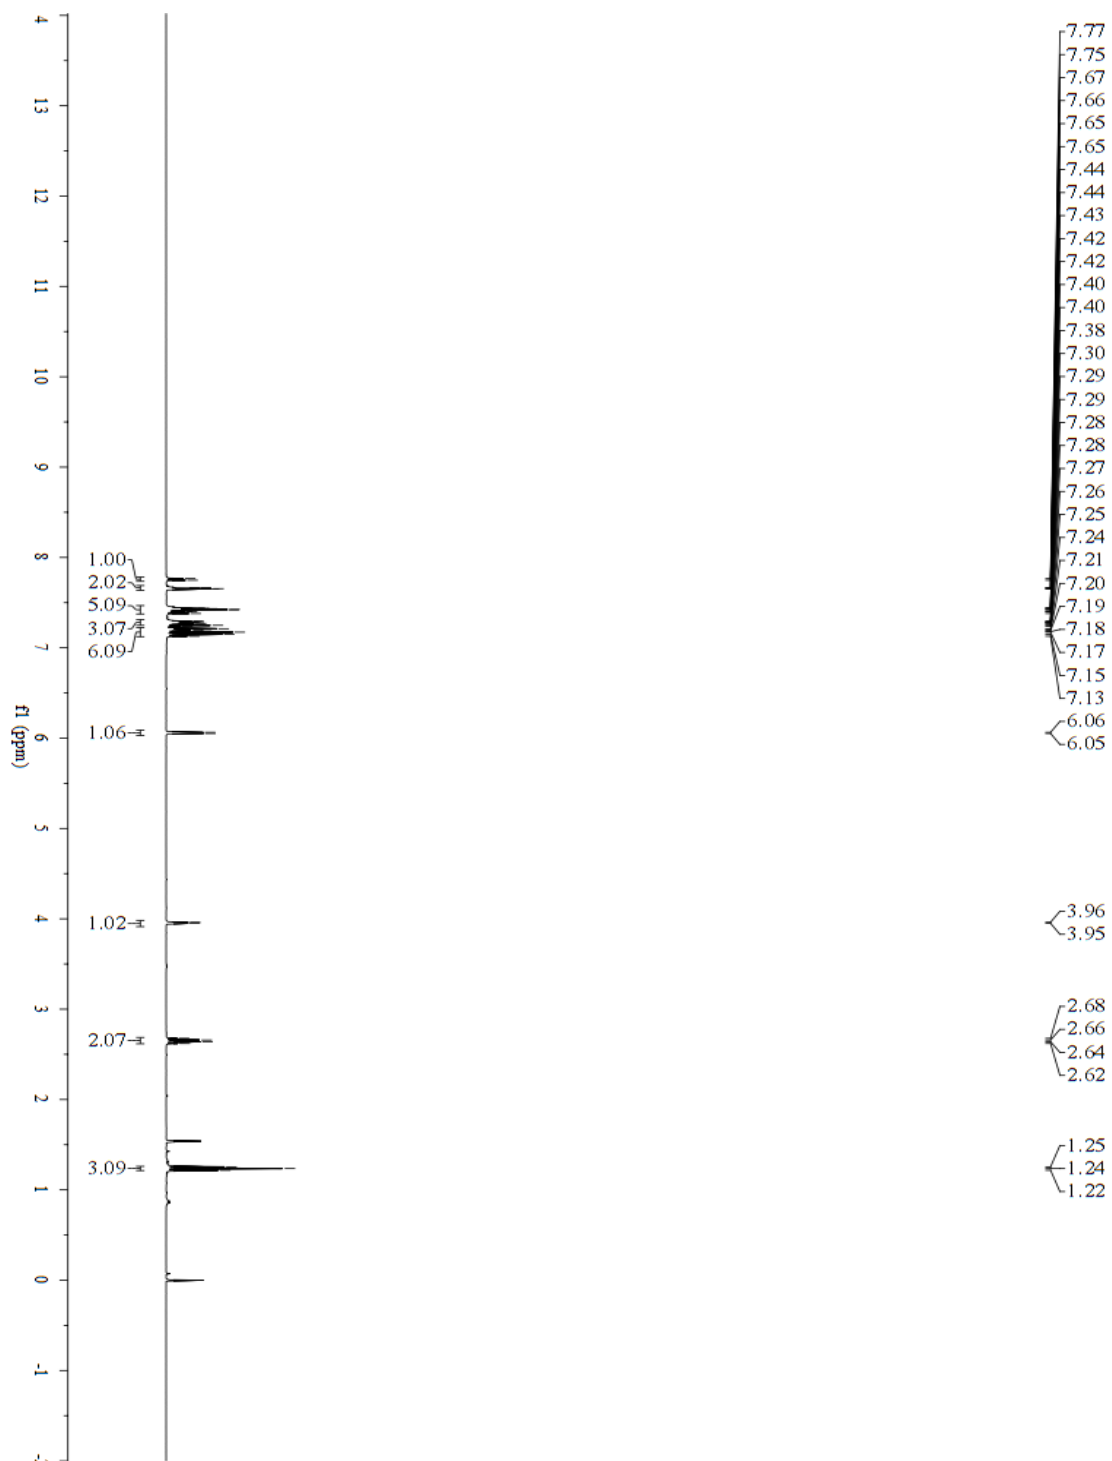

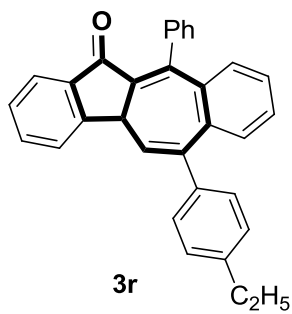

$^{13}\text{C}$  NMR (100 MHz,  $\text{CDCl}_3$ )

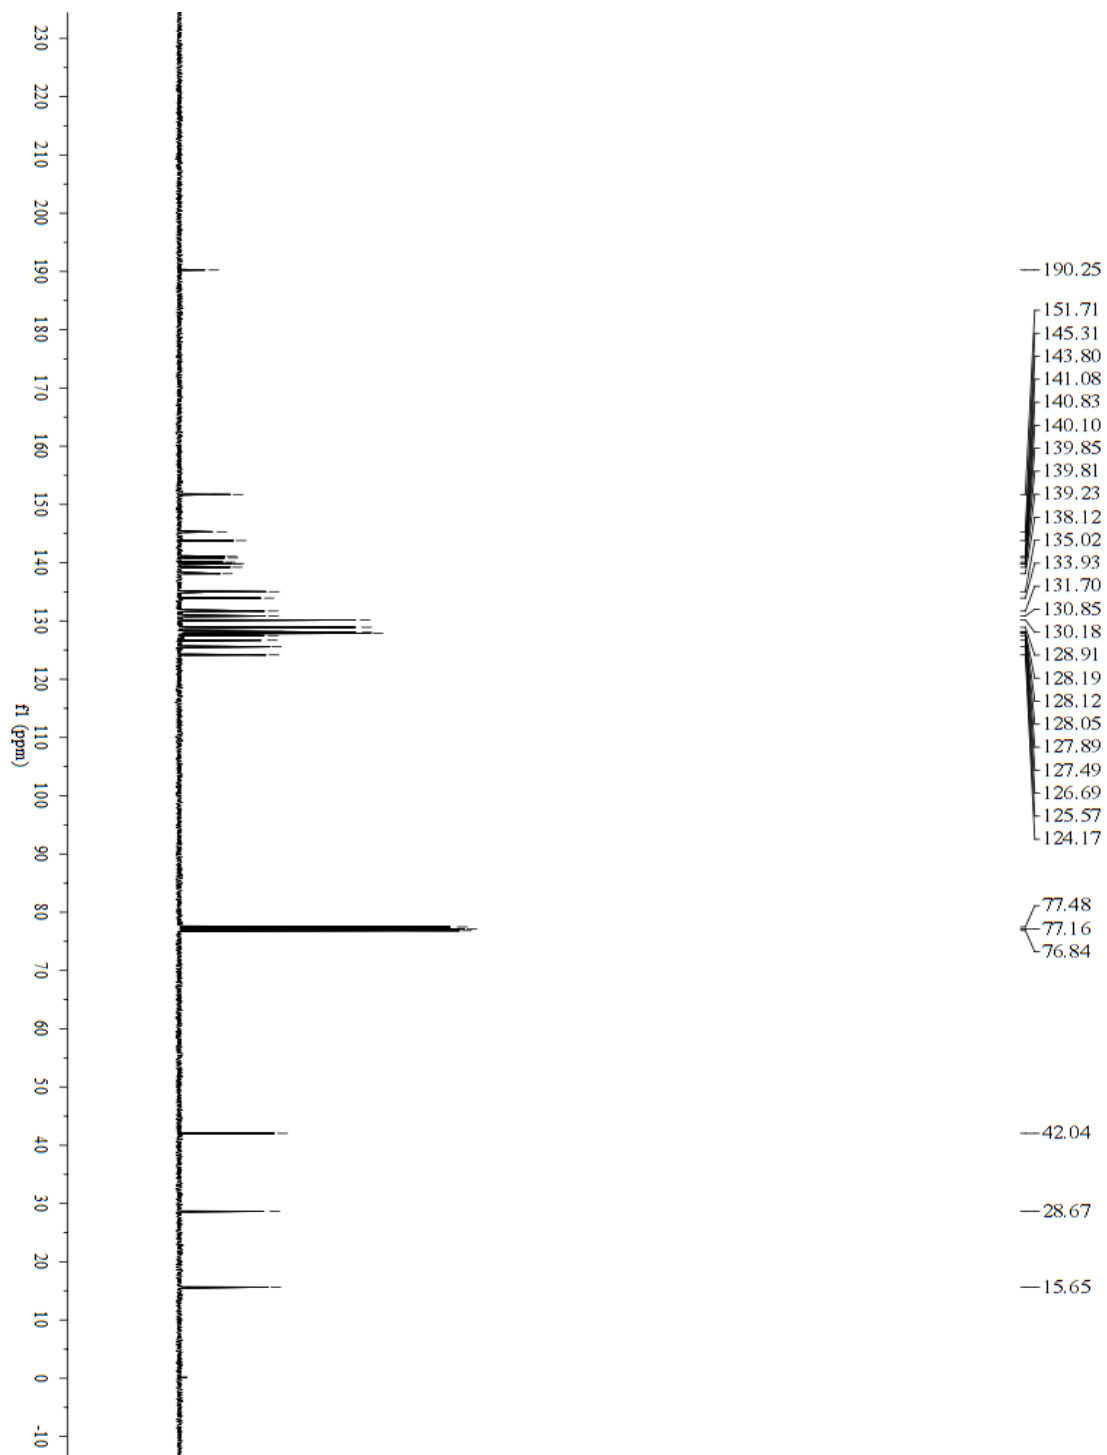

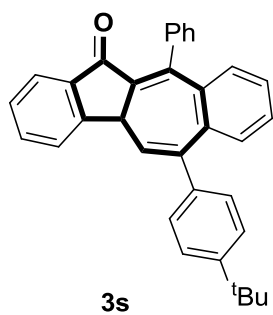

<sup>1</sup>H NMR (400 MHz, CDCl<sub>3</sub>)

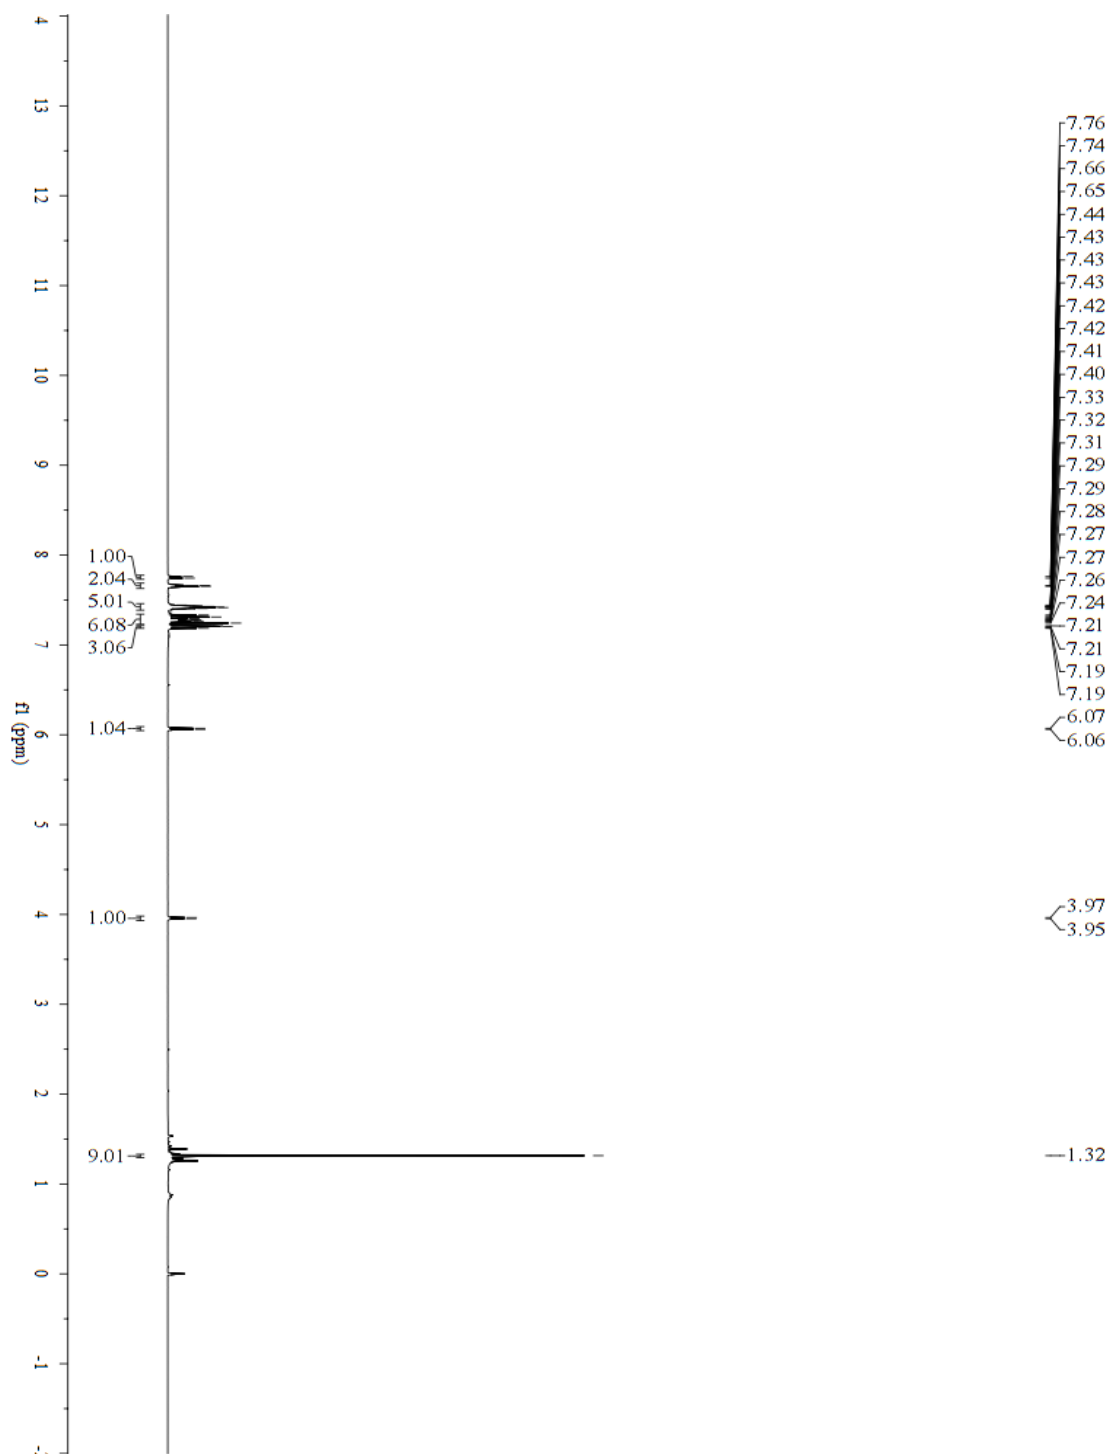

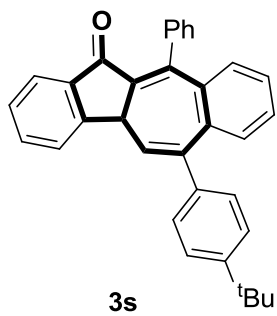

$^{13}\text{C}$  NMR (100 MHz,  $\text{CDCl}_3$ )

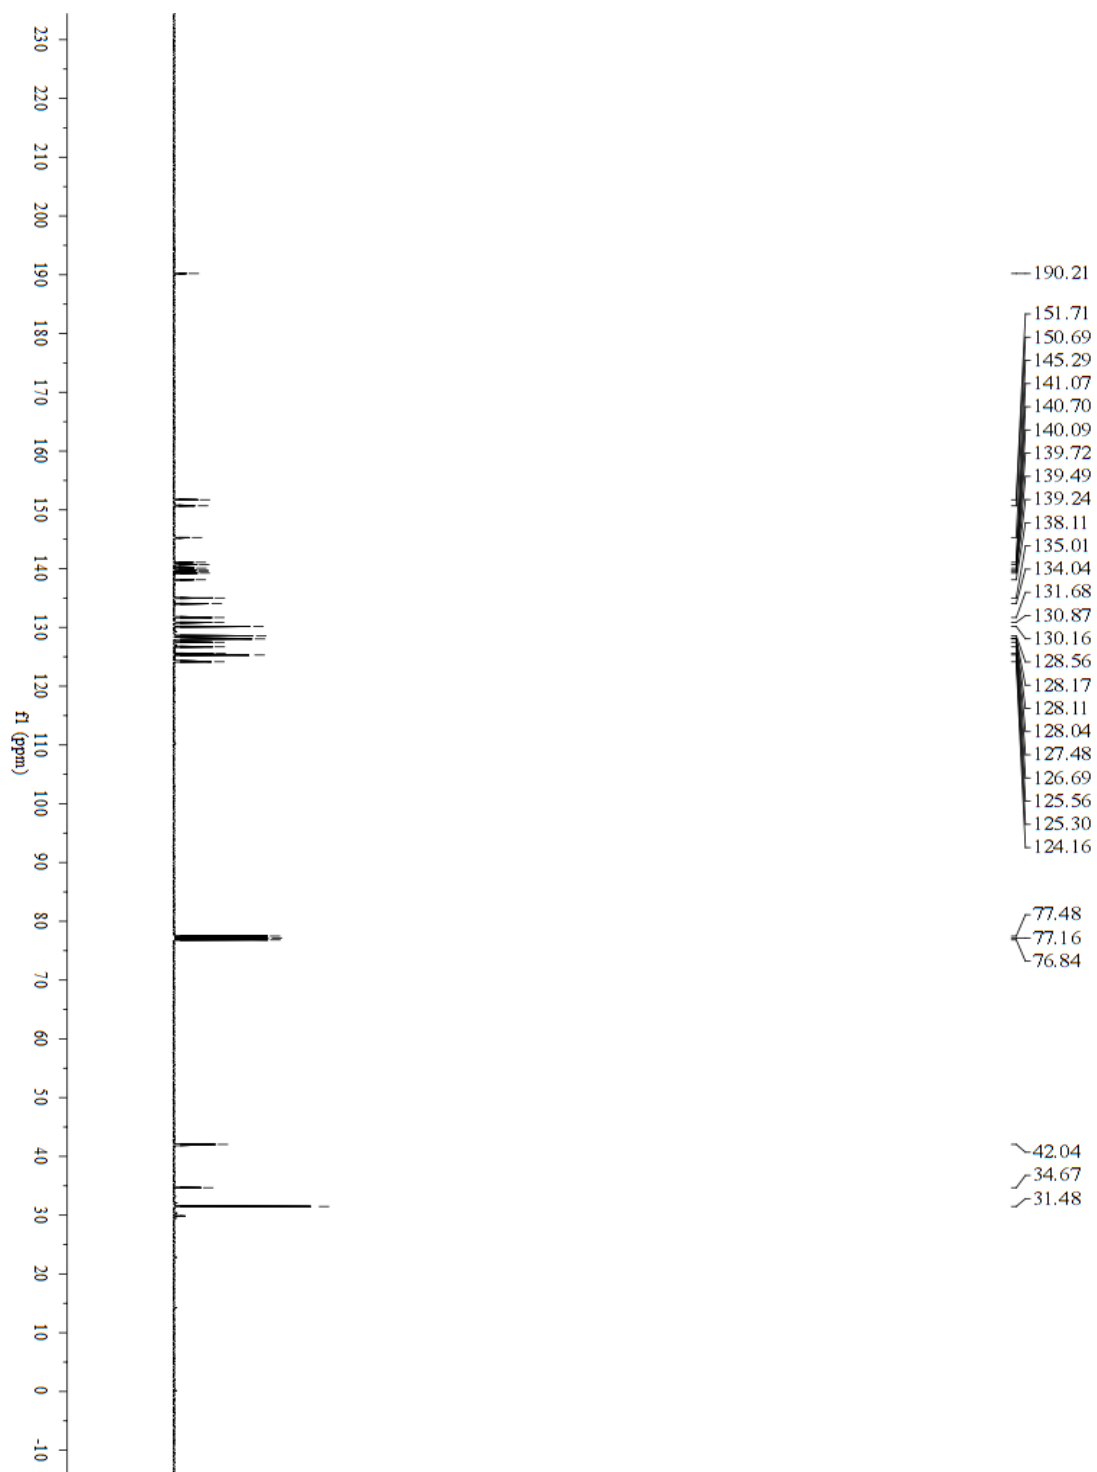



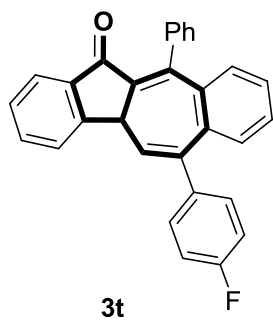

<sup>1</sup>H NMR (400 MHz, CDCl<sub>3</sub>)

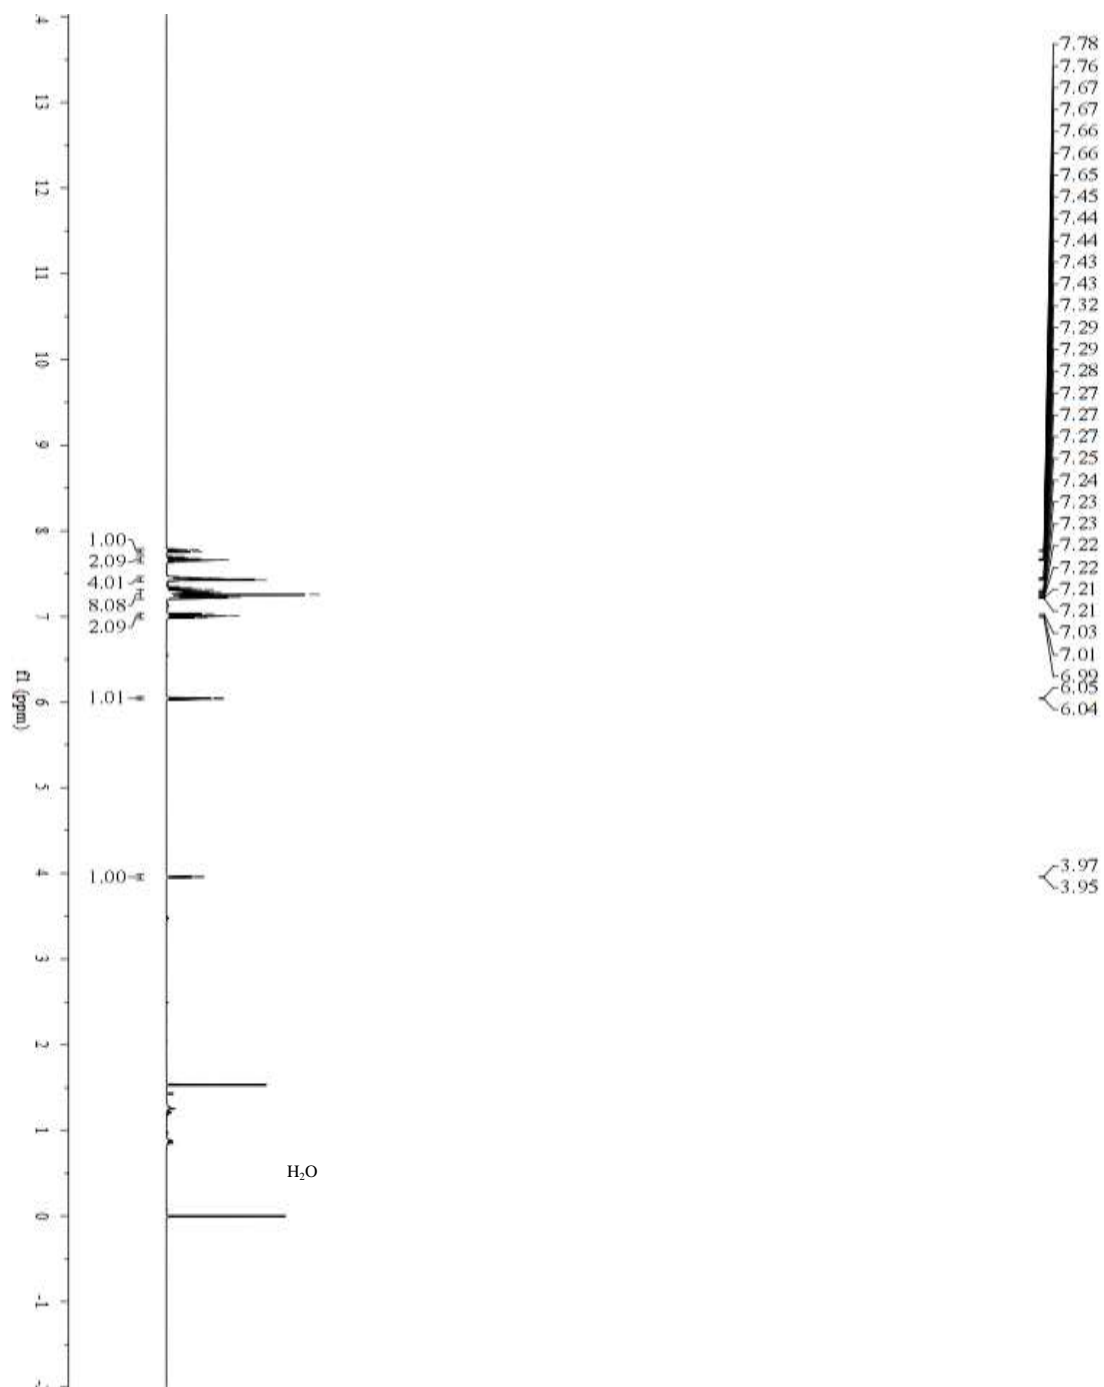

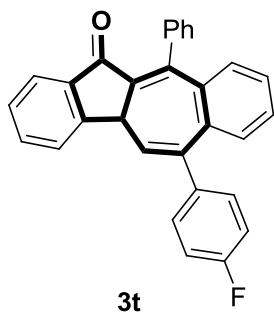

$^{13}\text{C}$  NMR (100 MHz,  $\text{CDCl}_3$ )

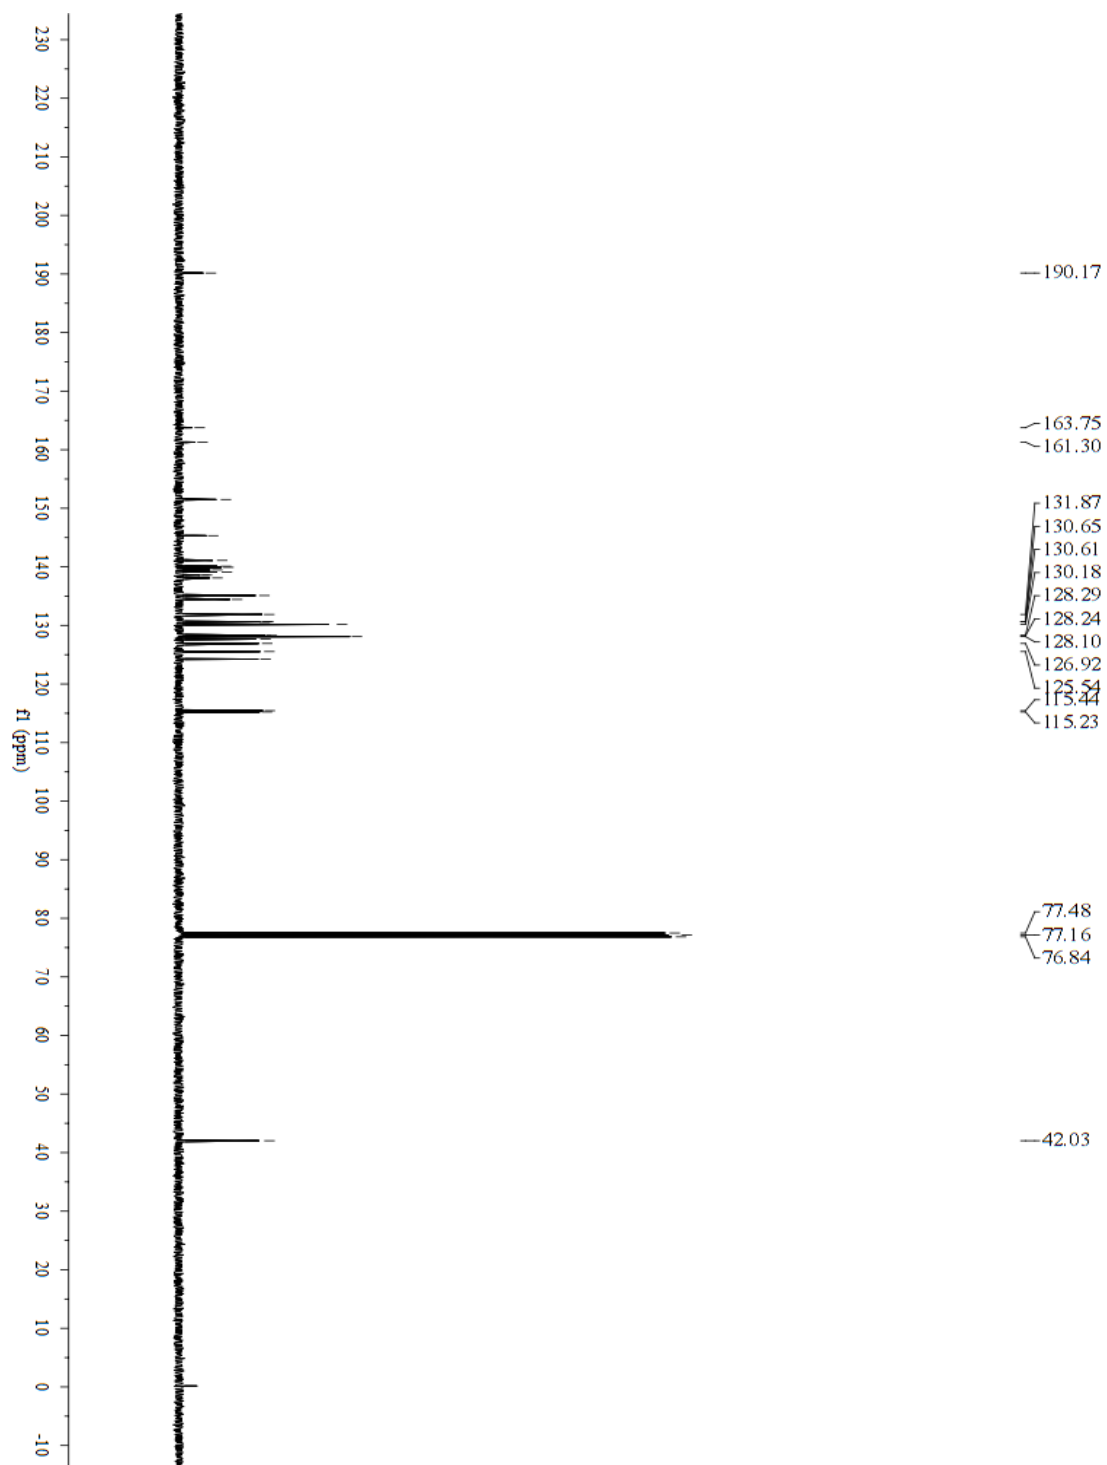

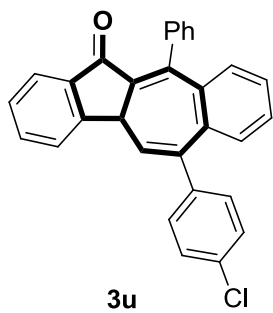

<sup>1</sup>H NMR (400 MHz, CDCl<sub>3</sub>)

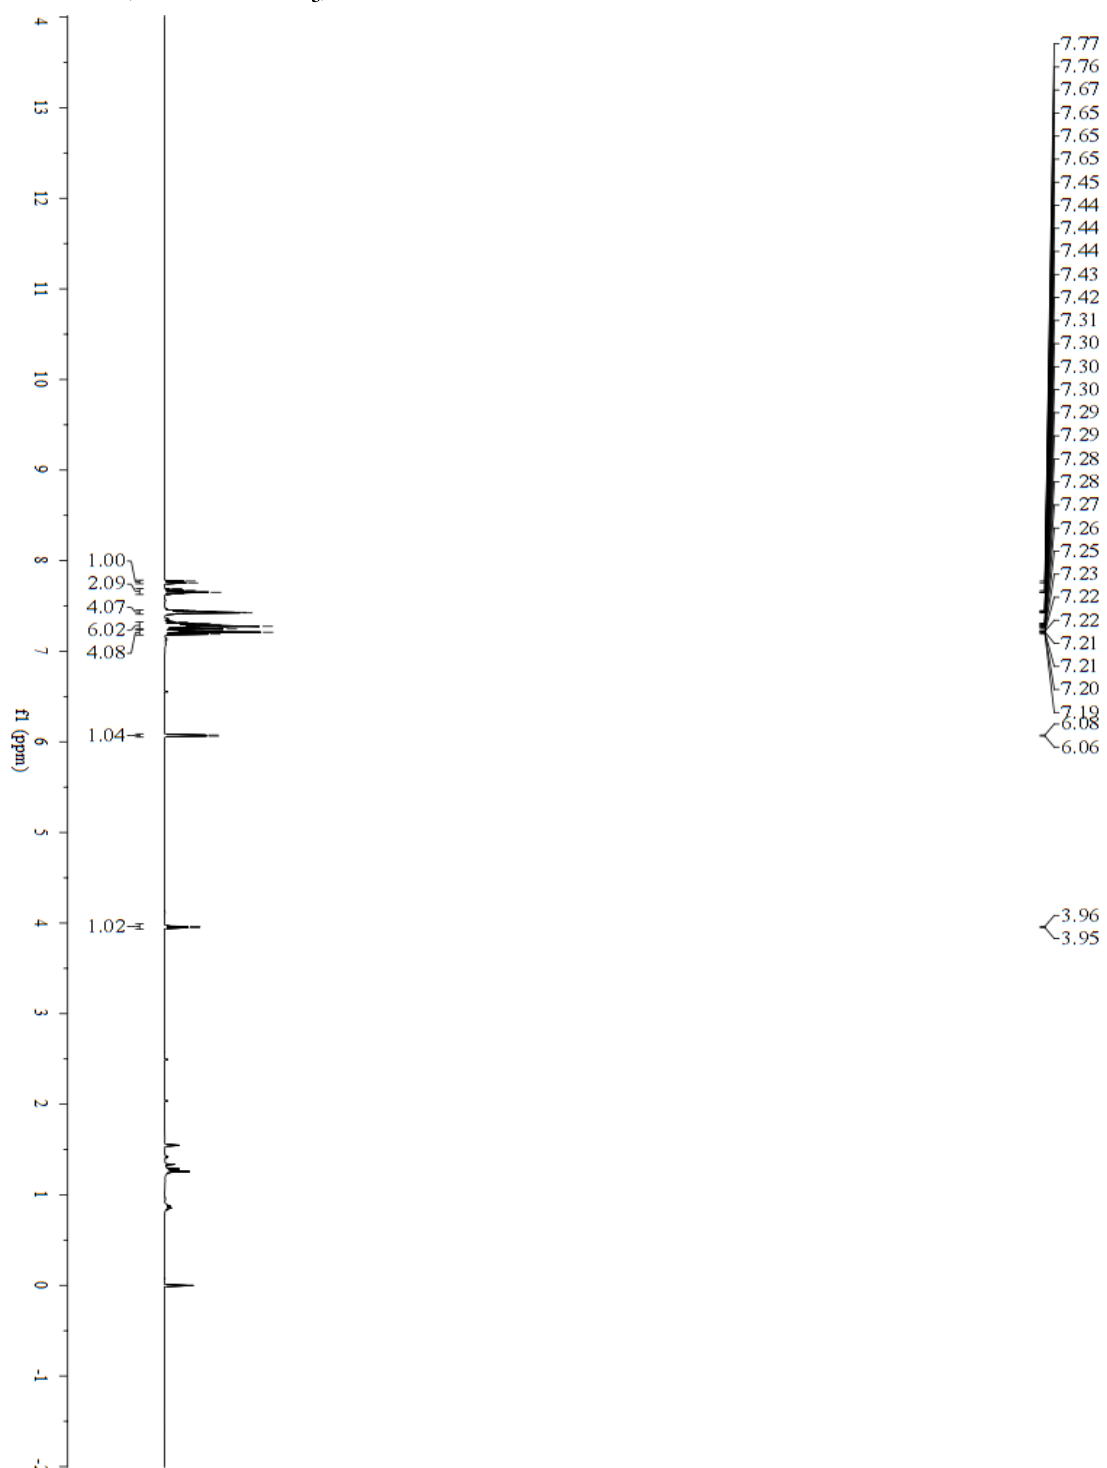

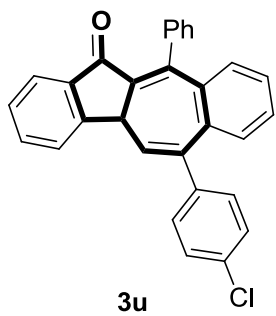

<sup>13</sup>C NMR (100 MHz, CDCl<sub>3</sub>)

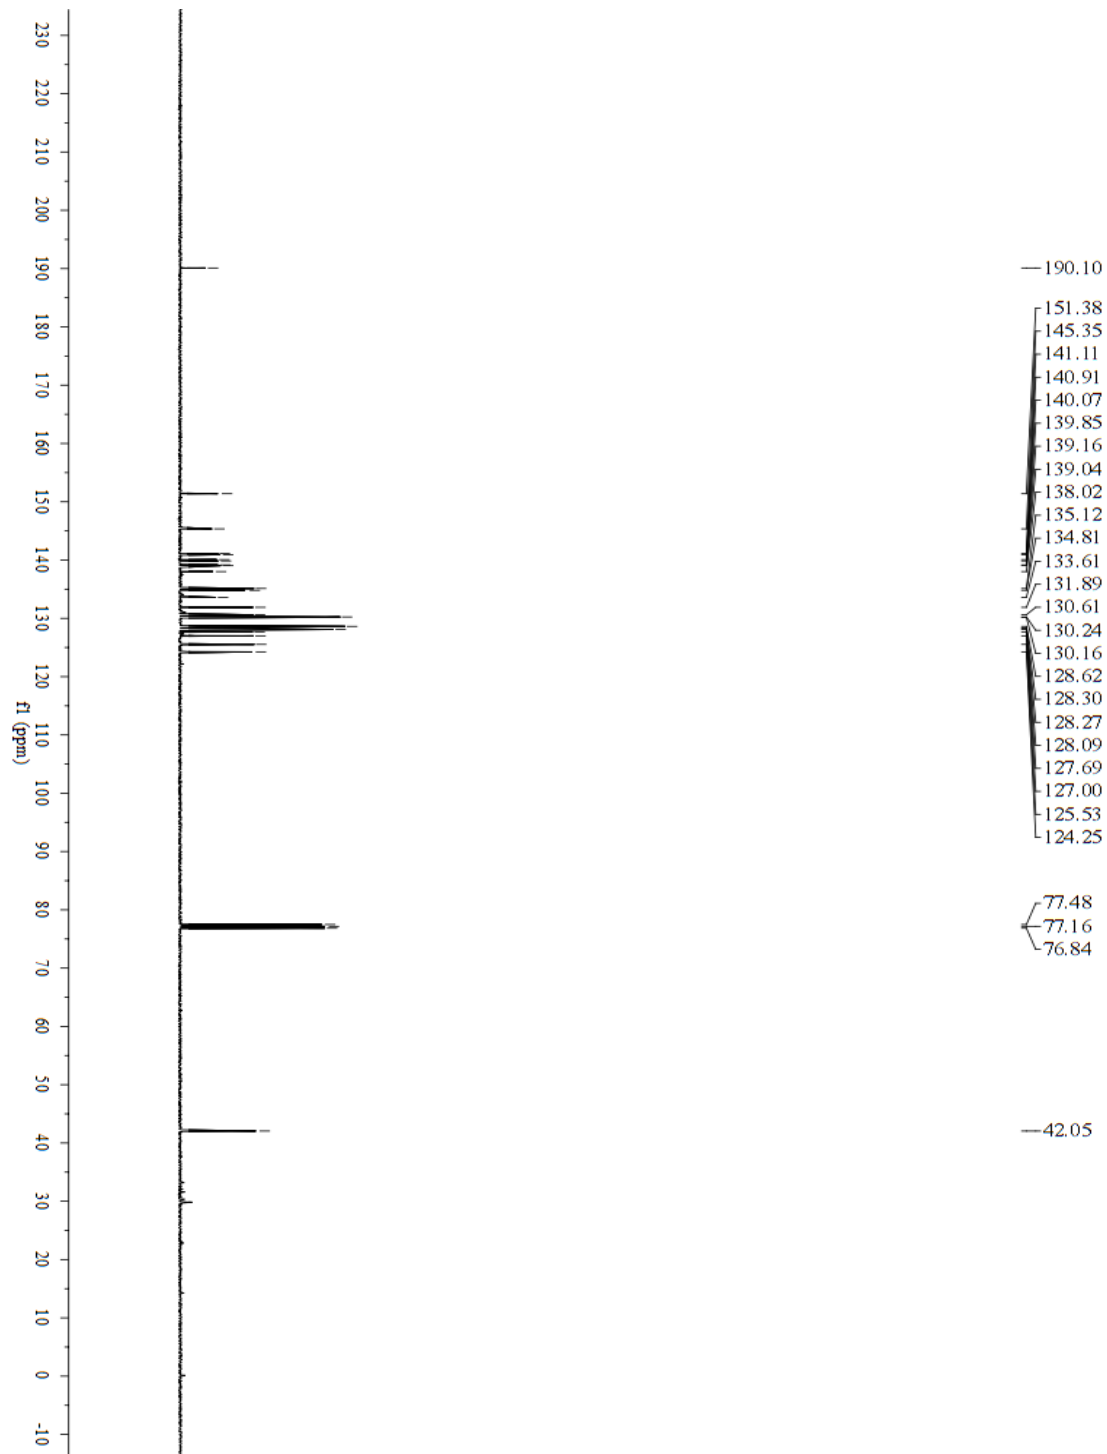

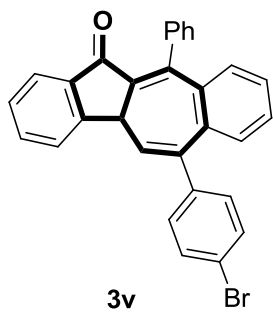

<sup>1</sup>H NMR (400 MHz, CDCl<sub>3</sub>)

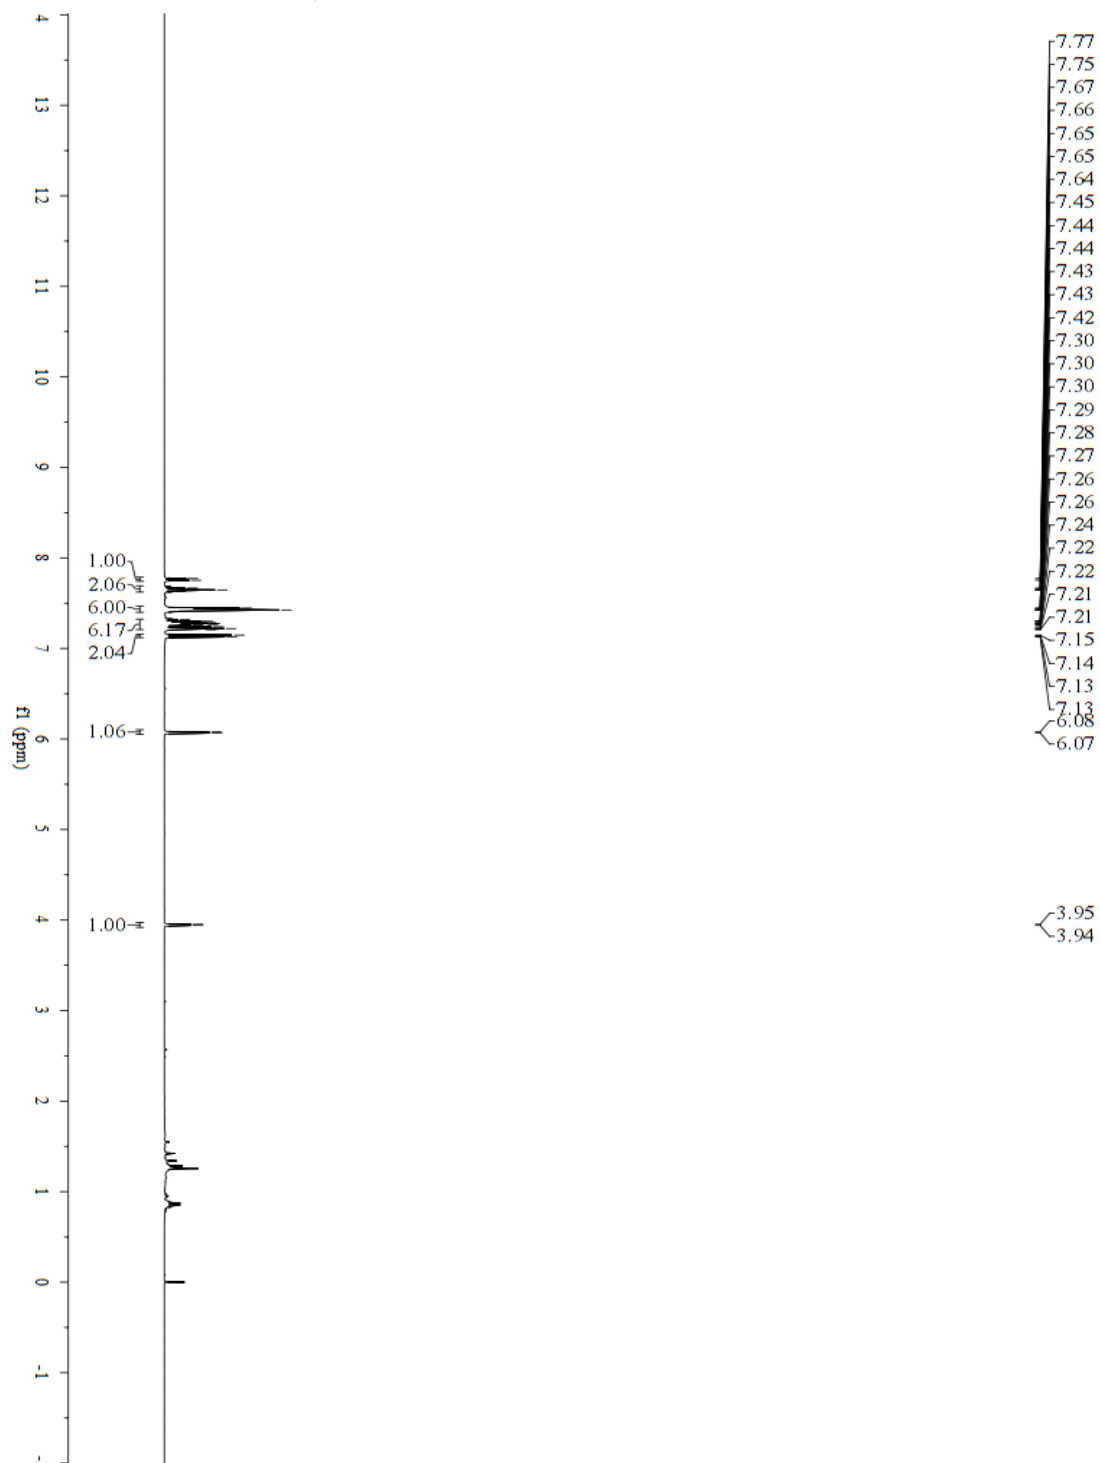

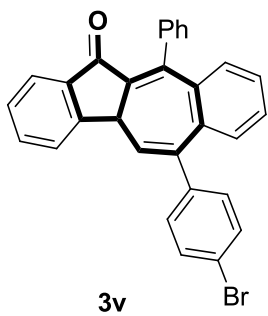

$^{13}\text{C}$  NMR (100 MHz,  $\text{CDCl}_3$ )

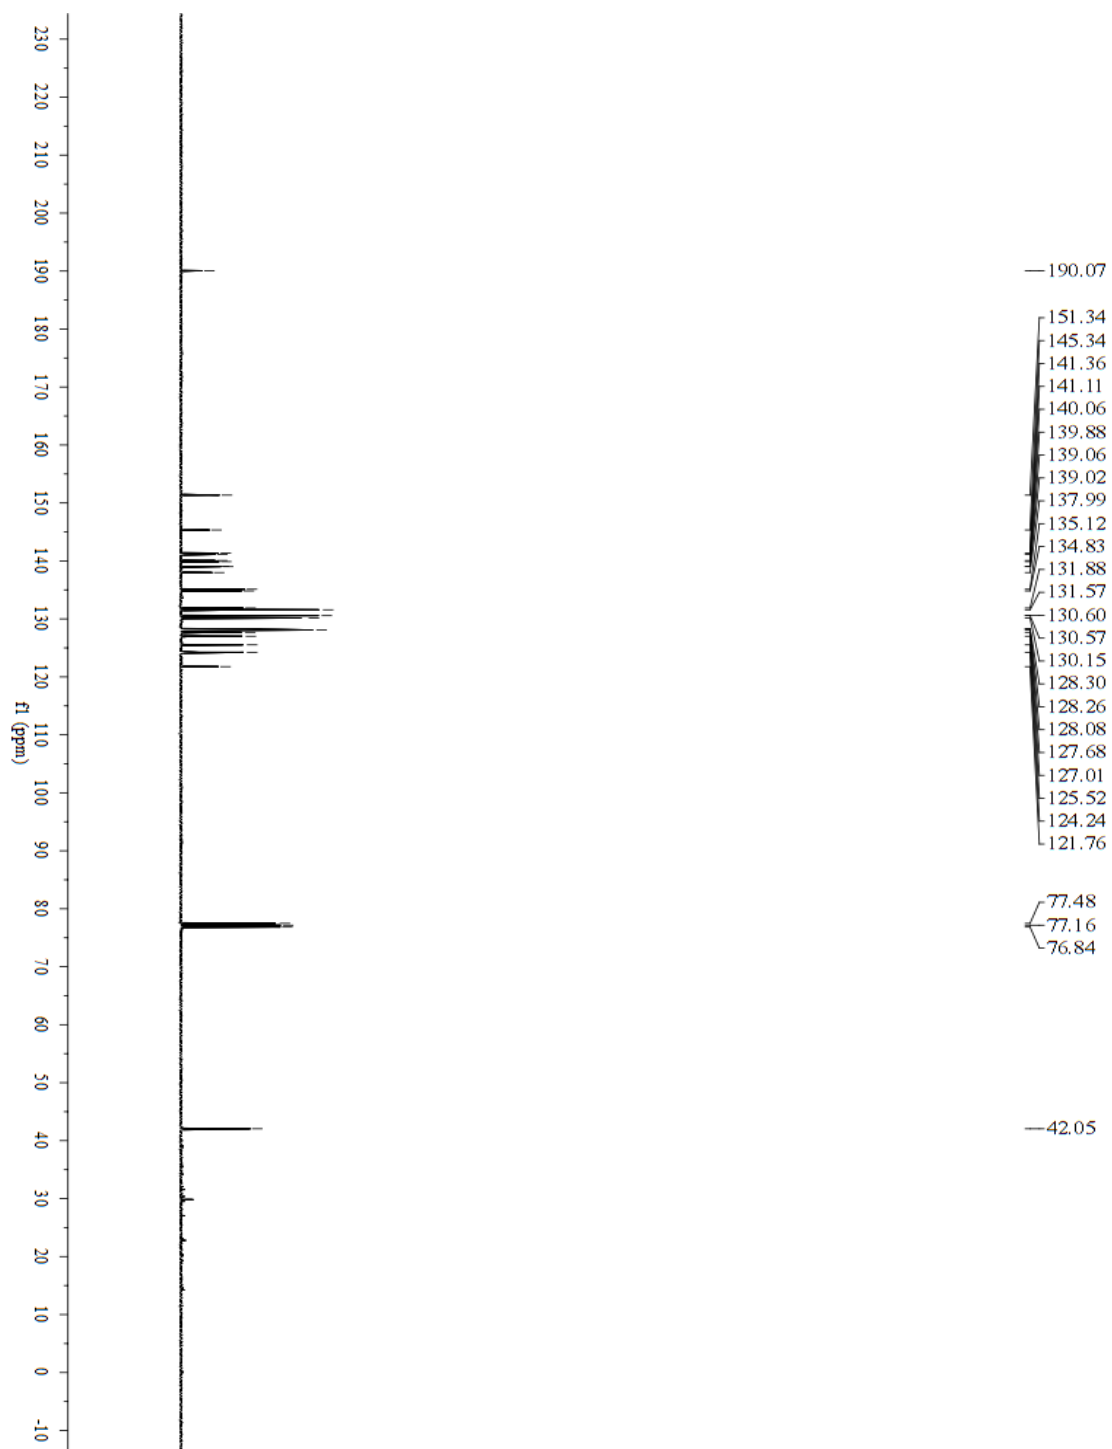

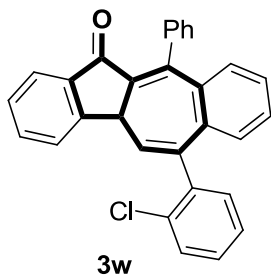

$^1\text{H NMR}$  (400 MHz,  $\text{CDCl}_3$ )

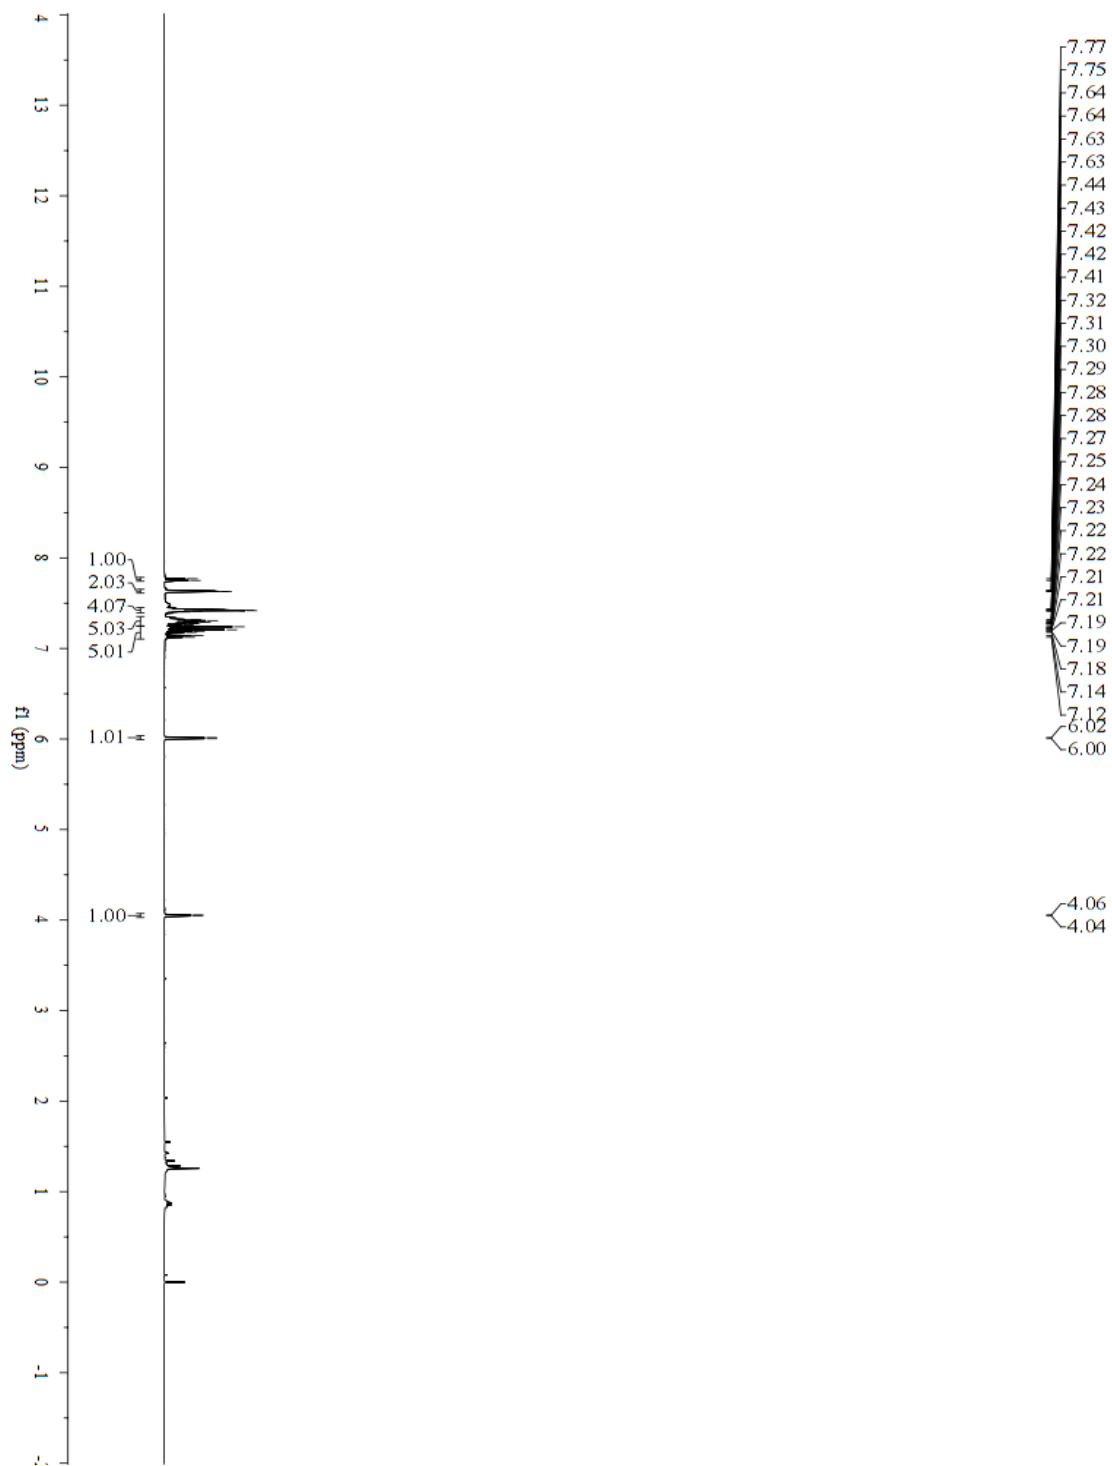

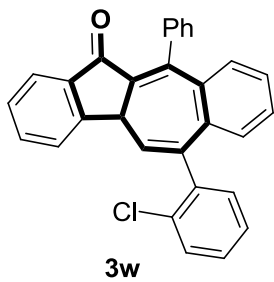

$^{13}\text{C}$  NMR (100 MHz,  $\text{CDCl}_3$ )

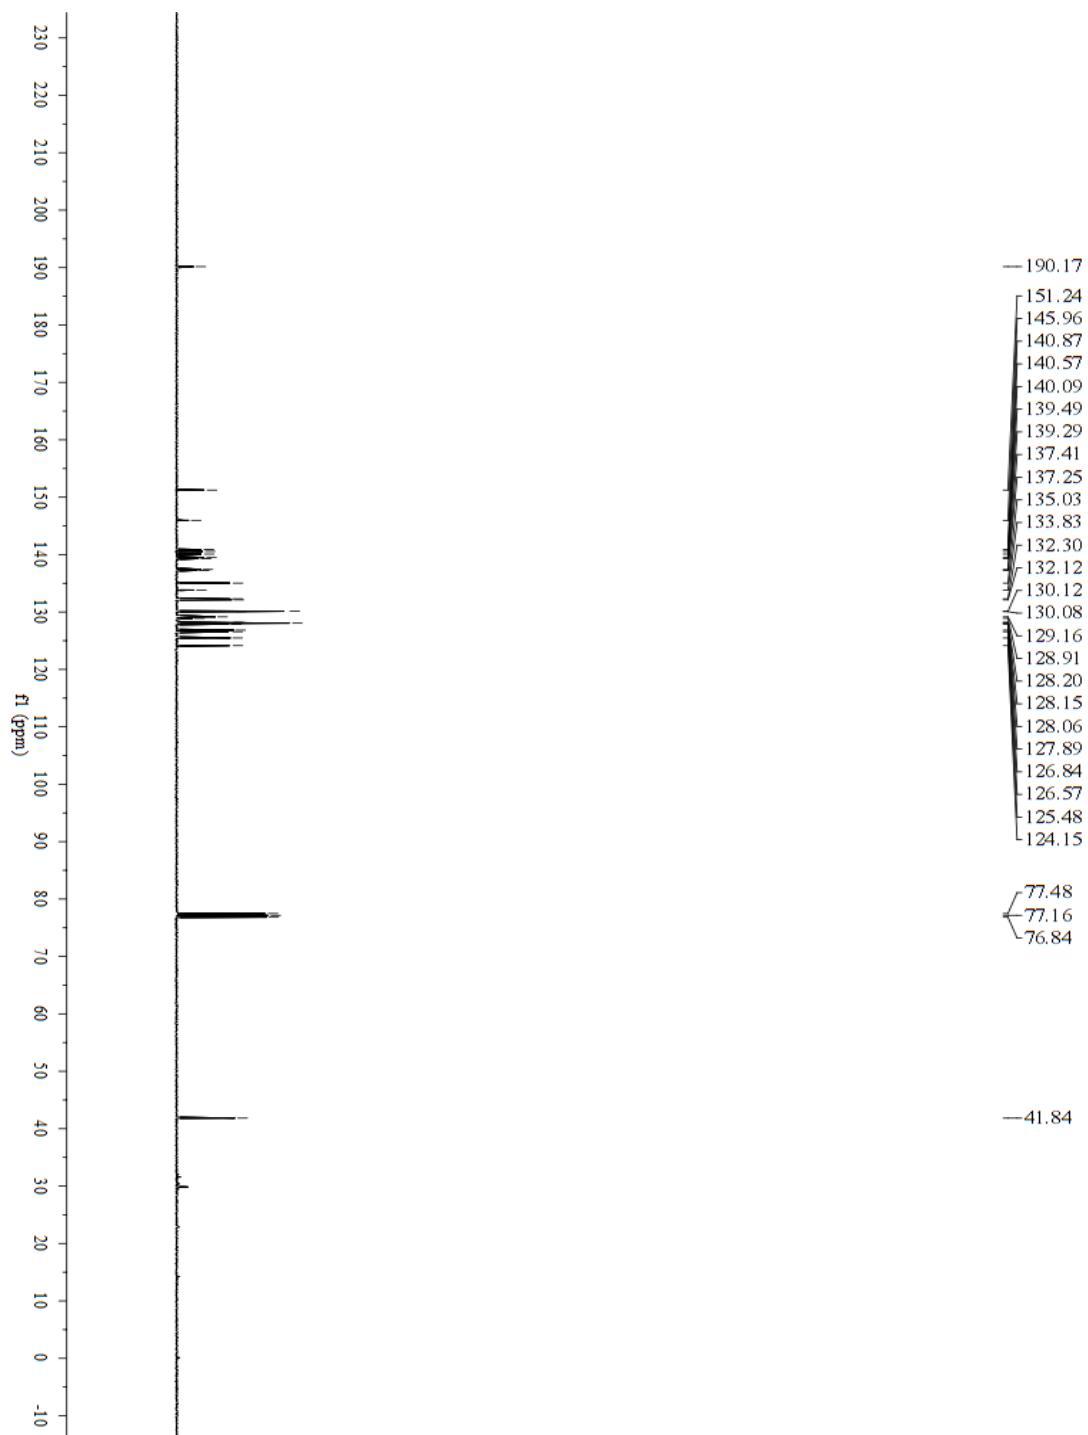



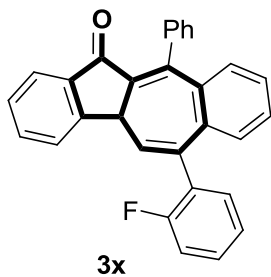

<sup>1</sup>H NMR (400 MHz, CDCl<sub>3</sub>)

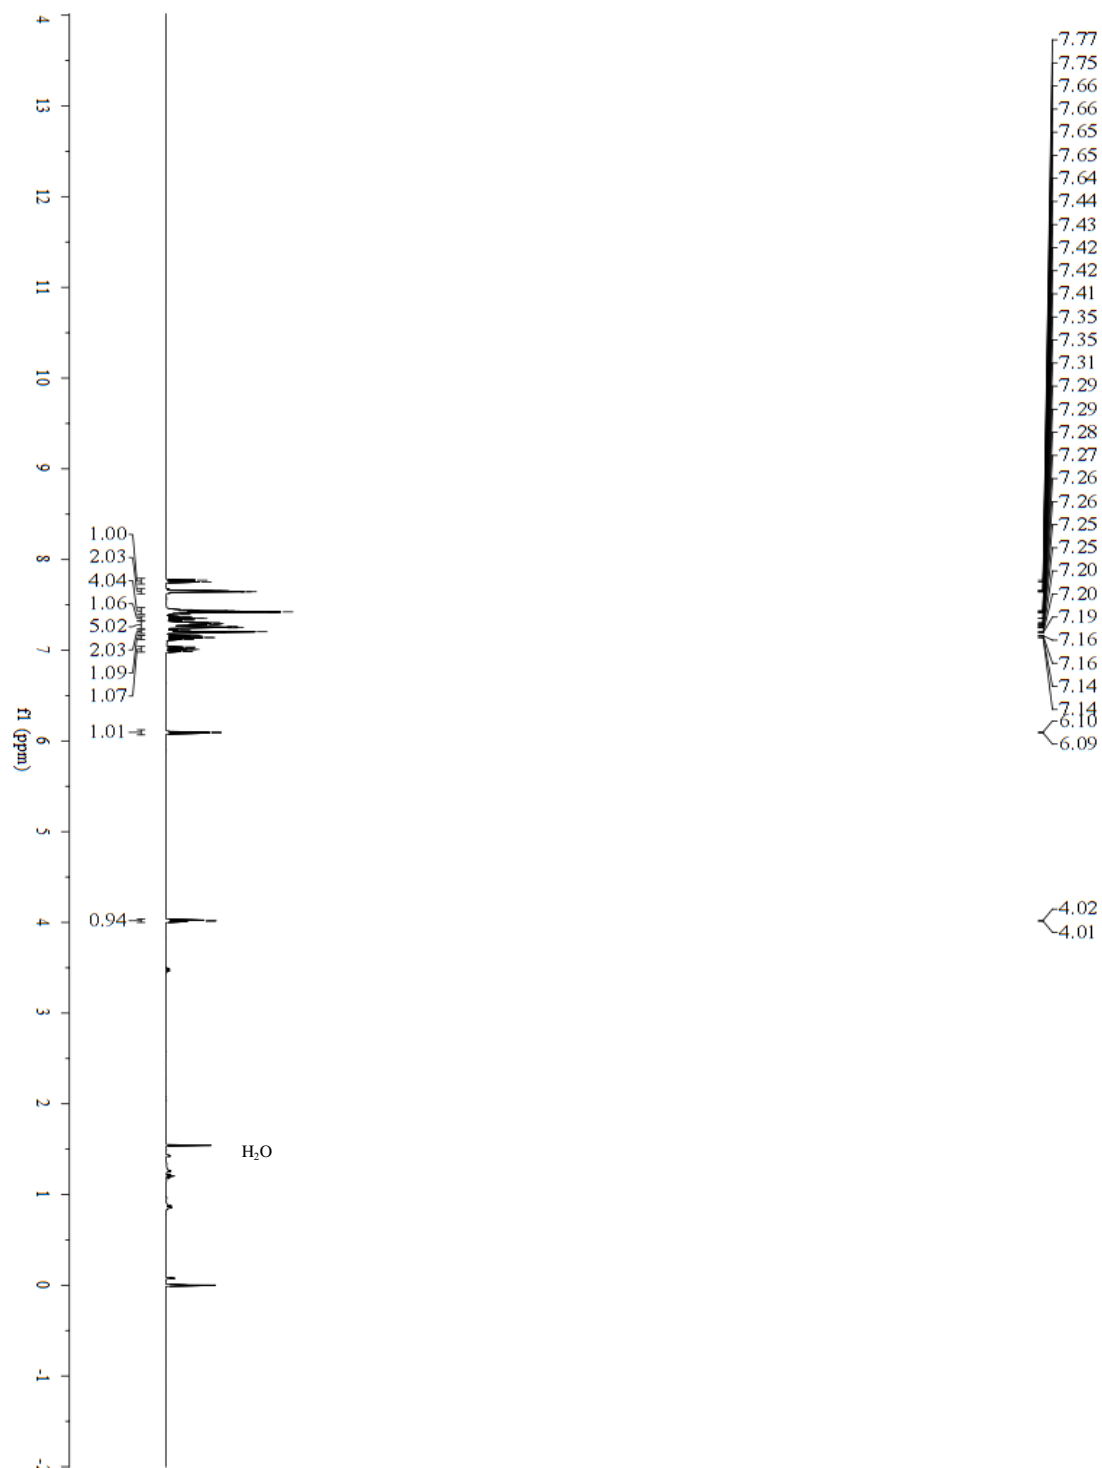

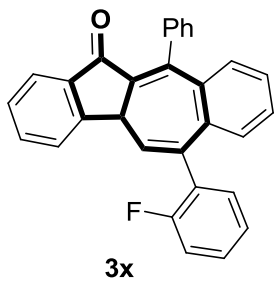

**3x**

$^{13}\text{C}$  NMR (100 MHz,  $\text{CDCl}_3$ )

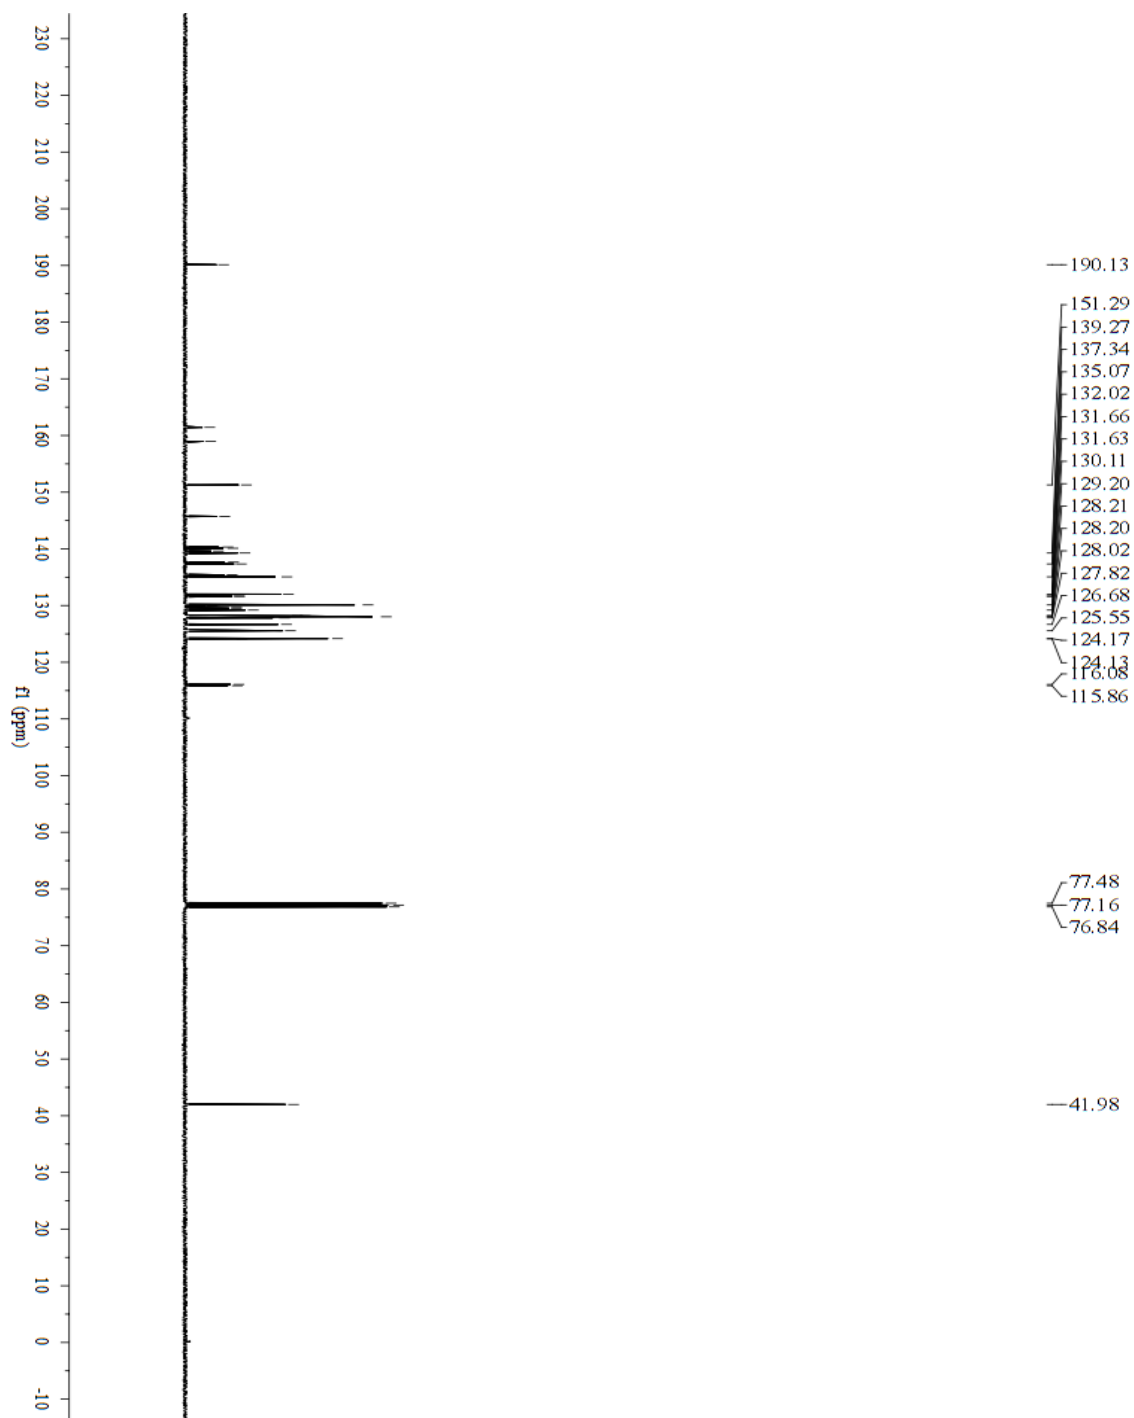

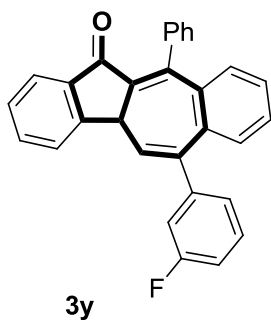

<sup>1</sup>H NMR (400 MHz, CDCl<sub>3</sub>)

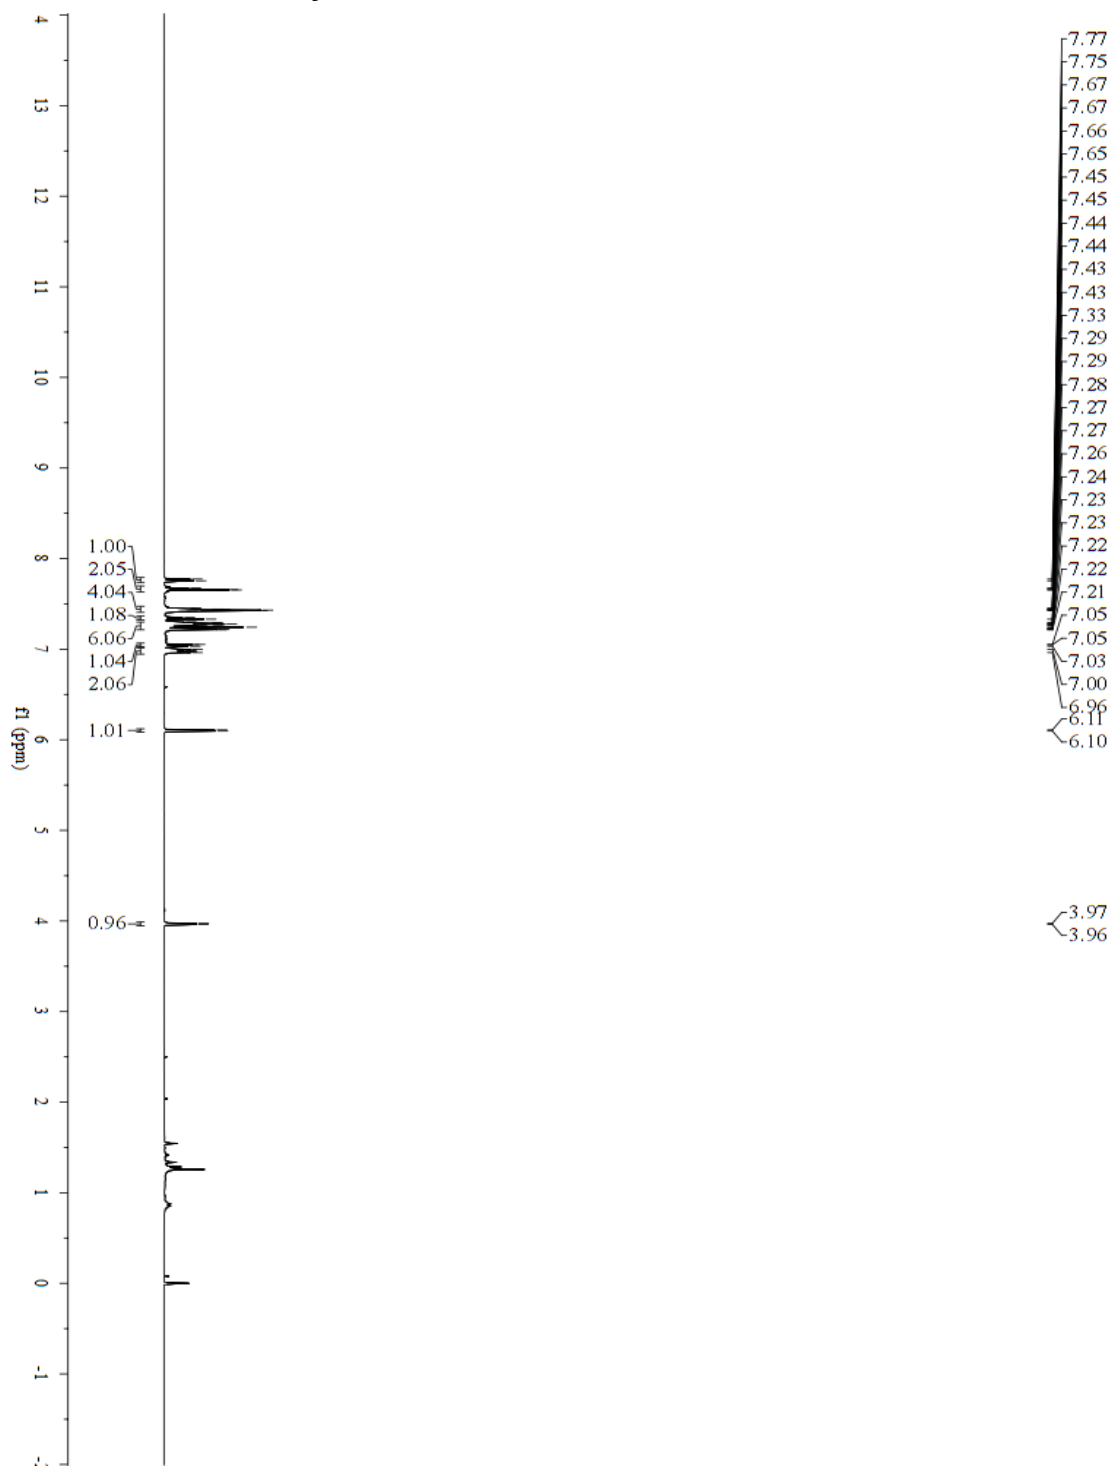

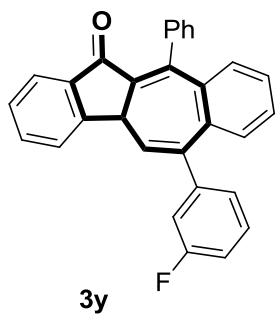

$^{13}\text{C}$  NMR (100 MHz,  $\text{CDCl}_3$ )

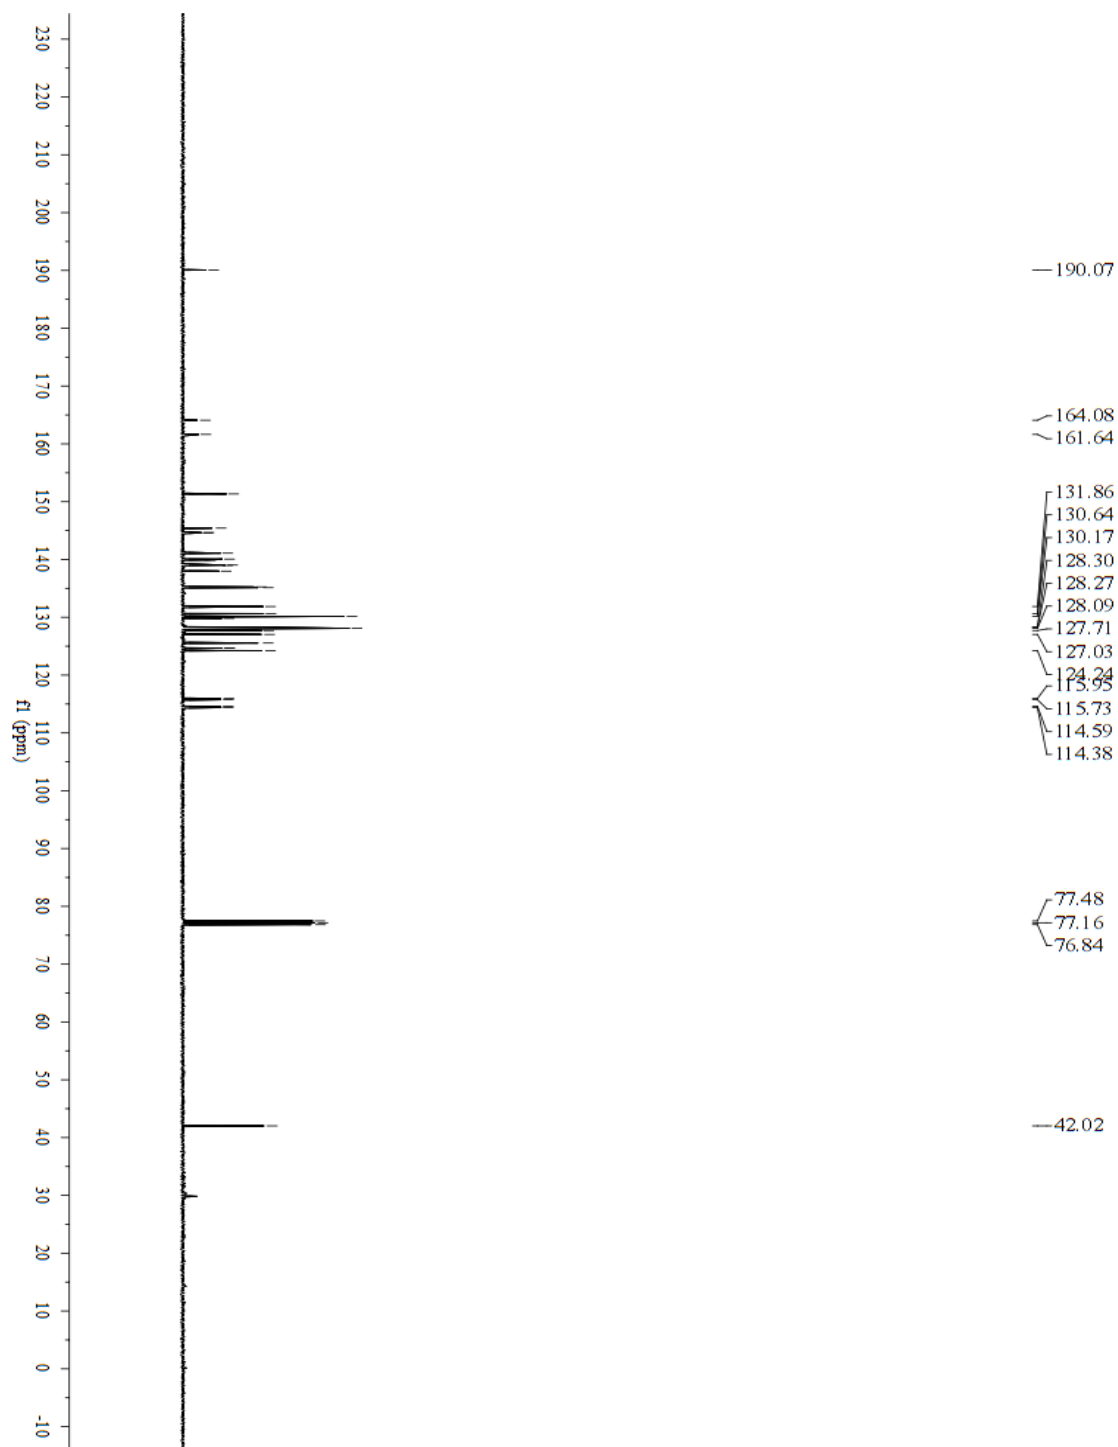

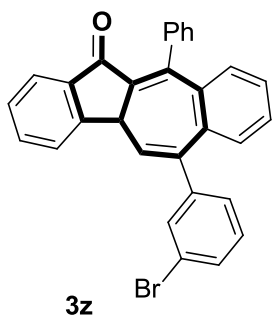

<sup>1</sup>H NMR (400 MHz, CDCl<sub>3</sub>)

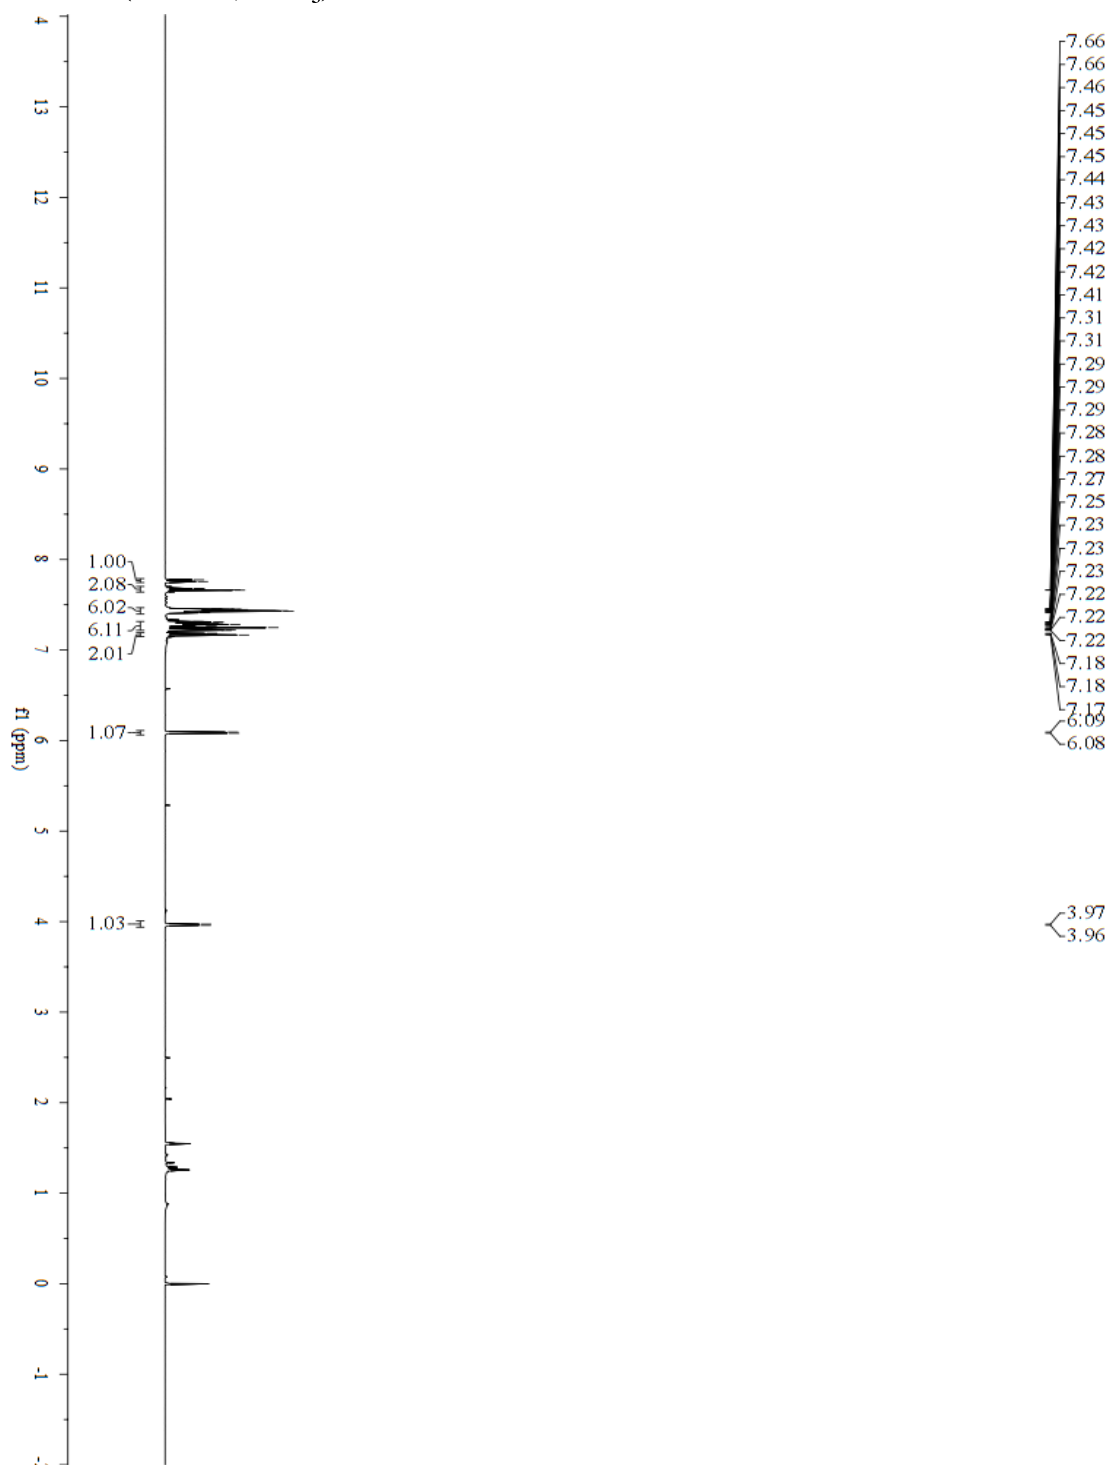

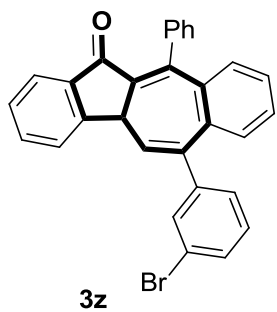

$^{13}\text{C}$  NMR (100 MHz,  $\text{CDCl}_3$ )

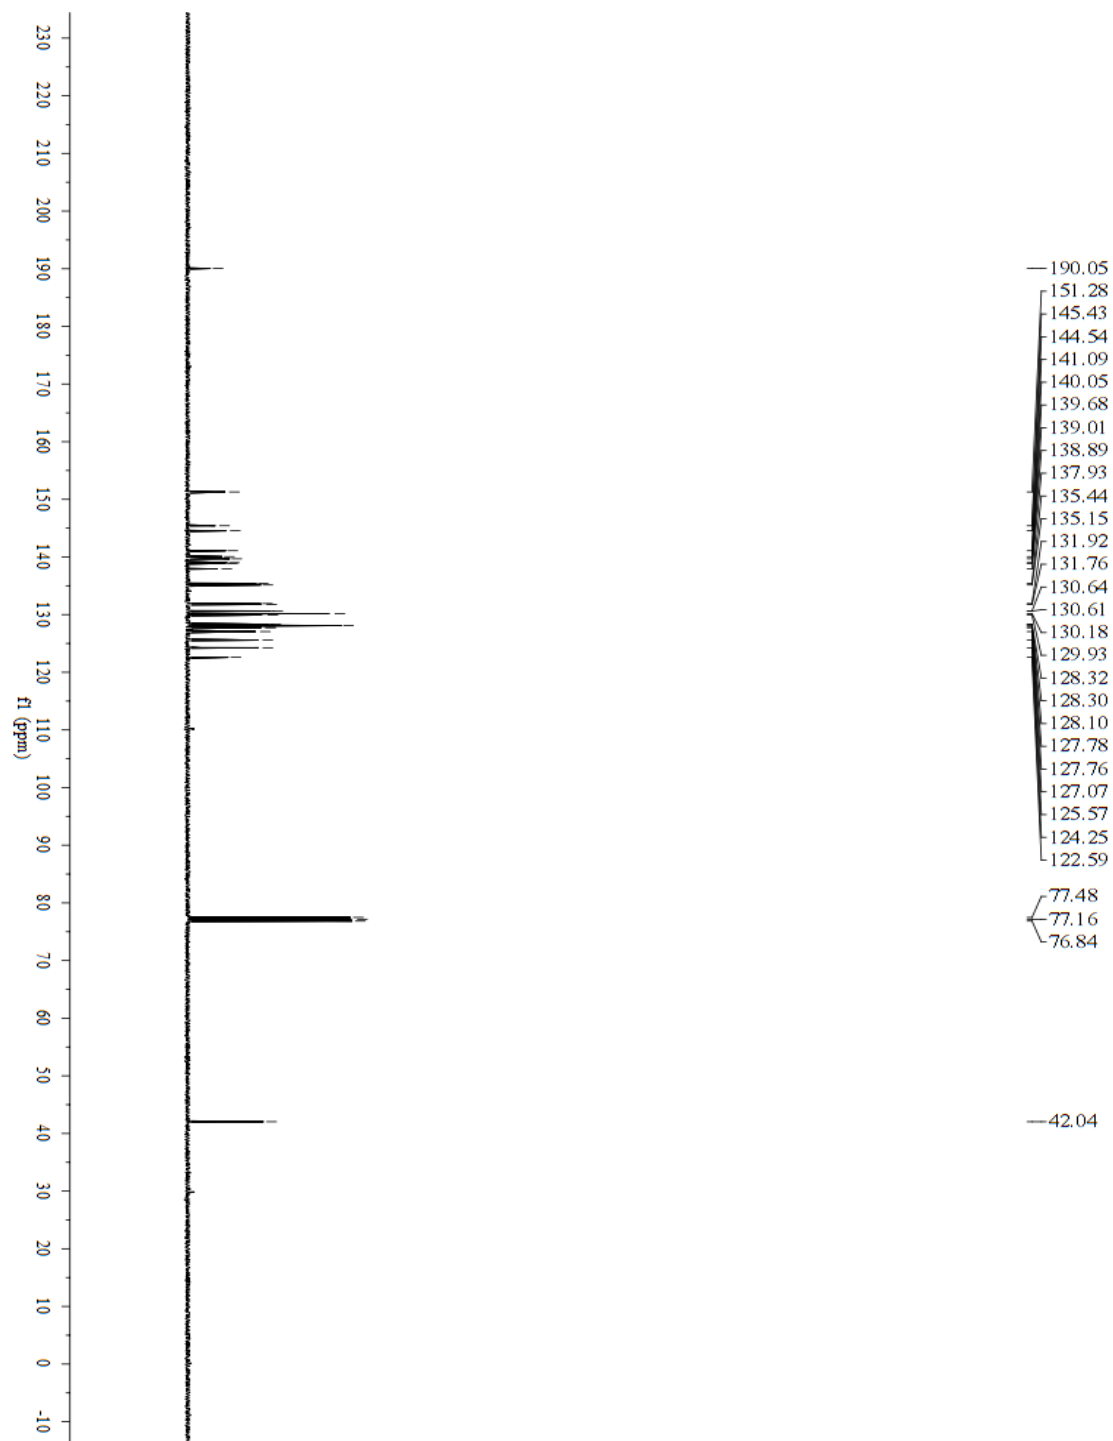

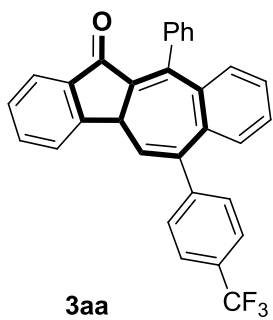

<sup>1</sup>H NMR (400 MHz, CDCl<sub>3</sub>)

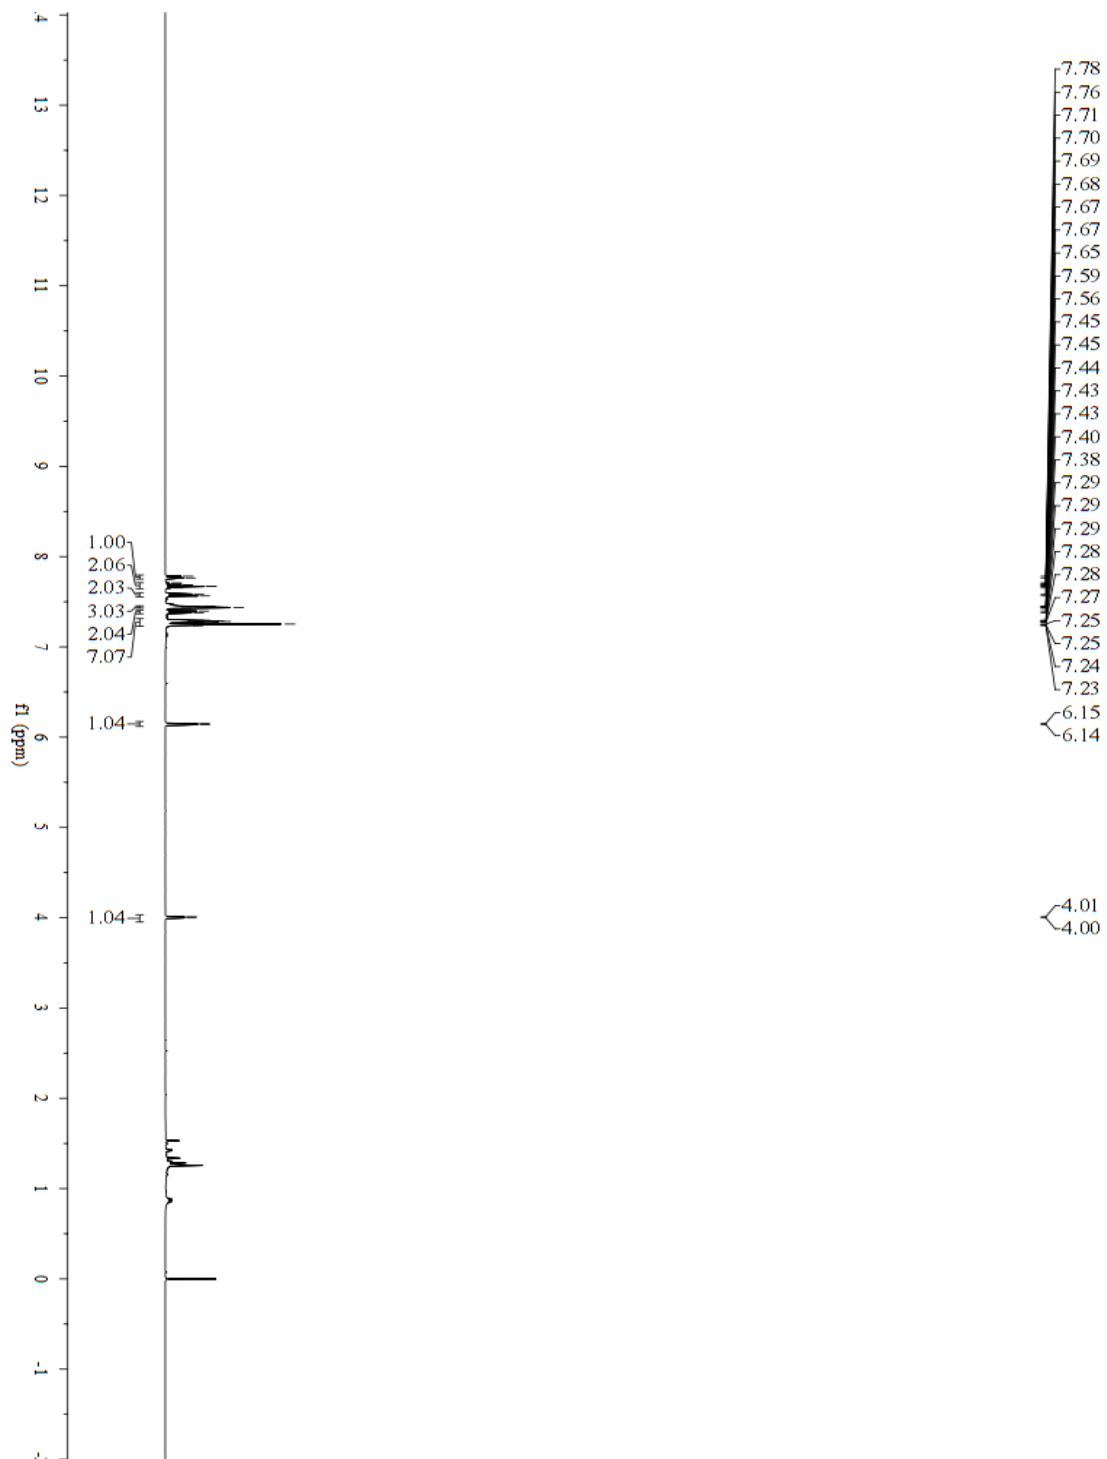

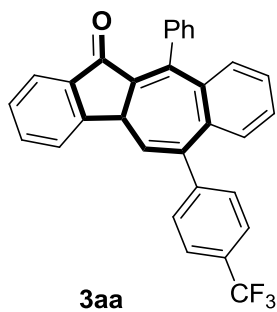

$^{13}\text{C}$  NMR (100 MHz,  $\text{CDCl}_3$ )

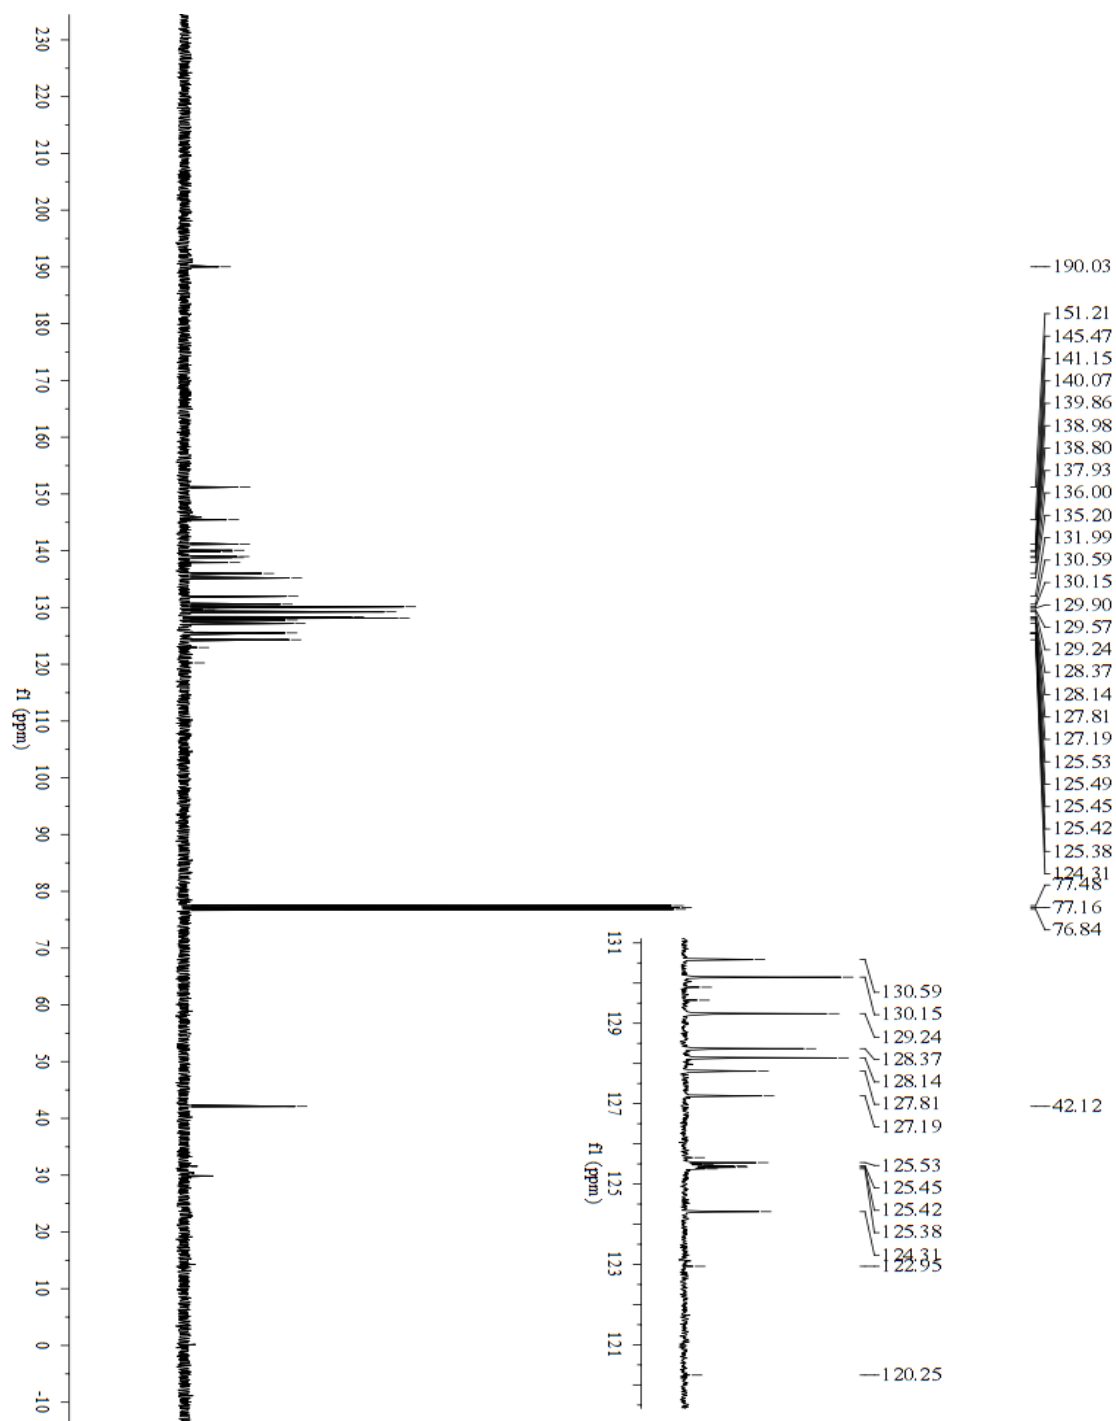



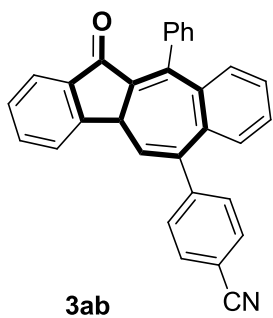

$^1\text{H NMR}$  (400 MHz,  $\text{CDCl}_3$ )

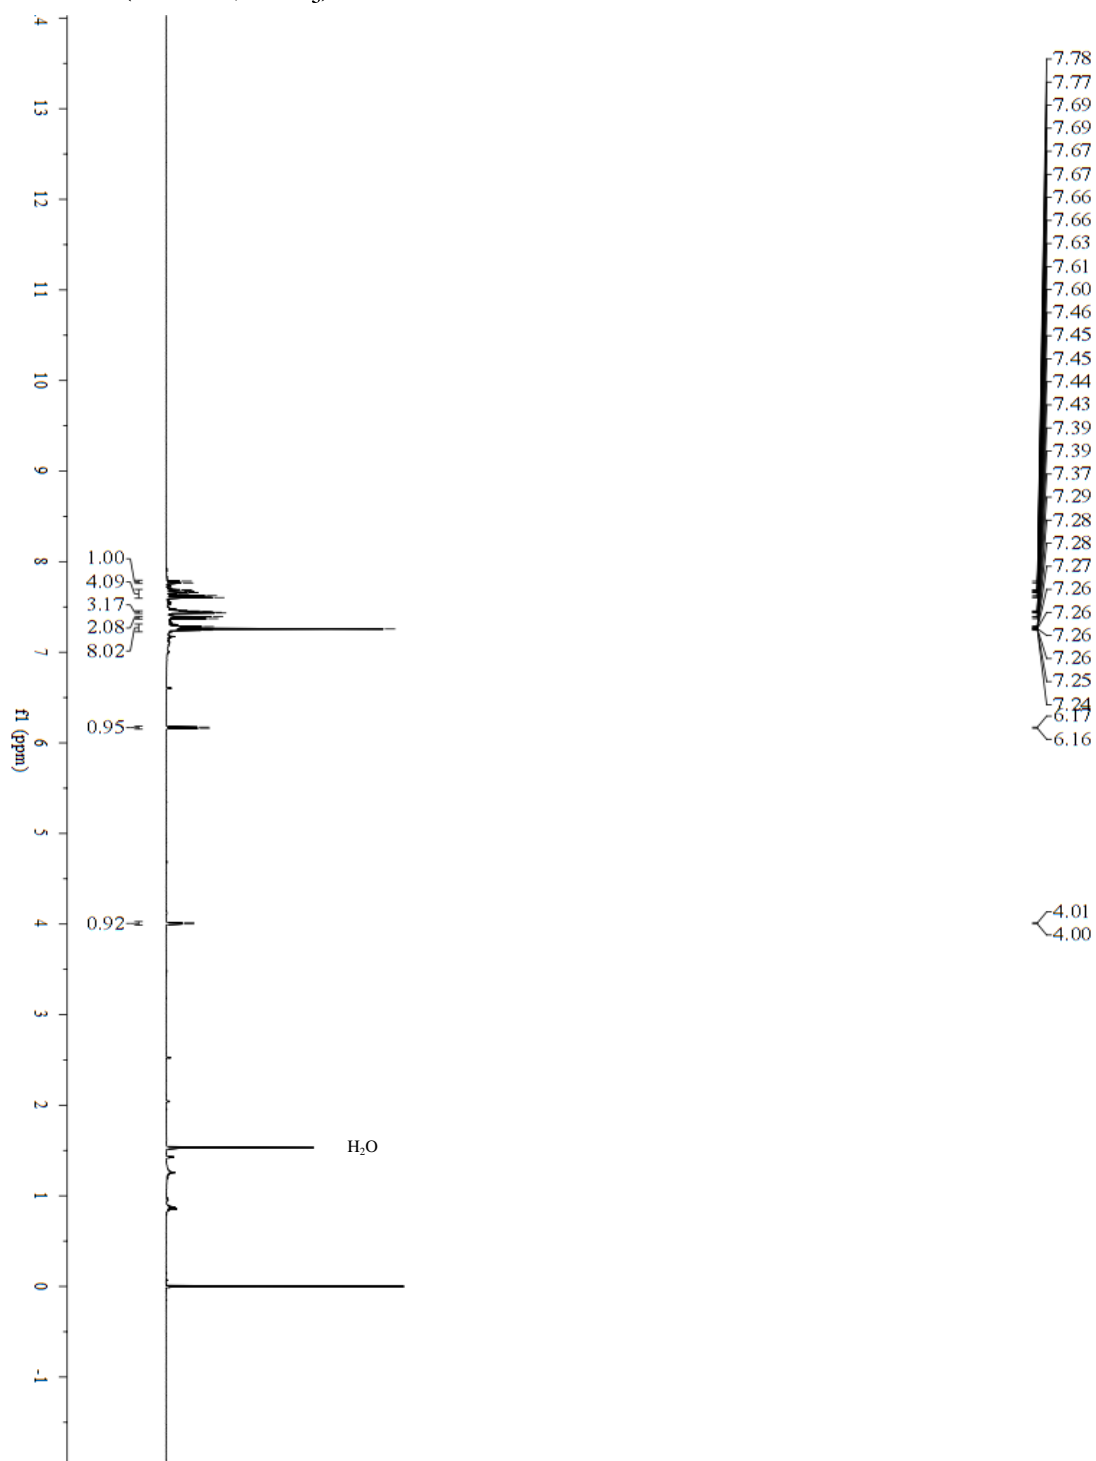

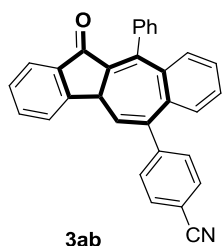

$^{13}\text{C}$  NMR (100 MHz,  $\text{CDCl}_3$ )

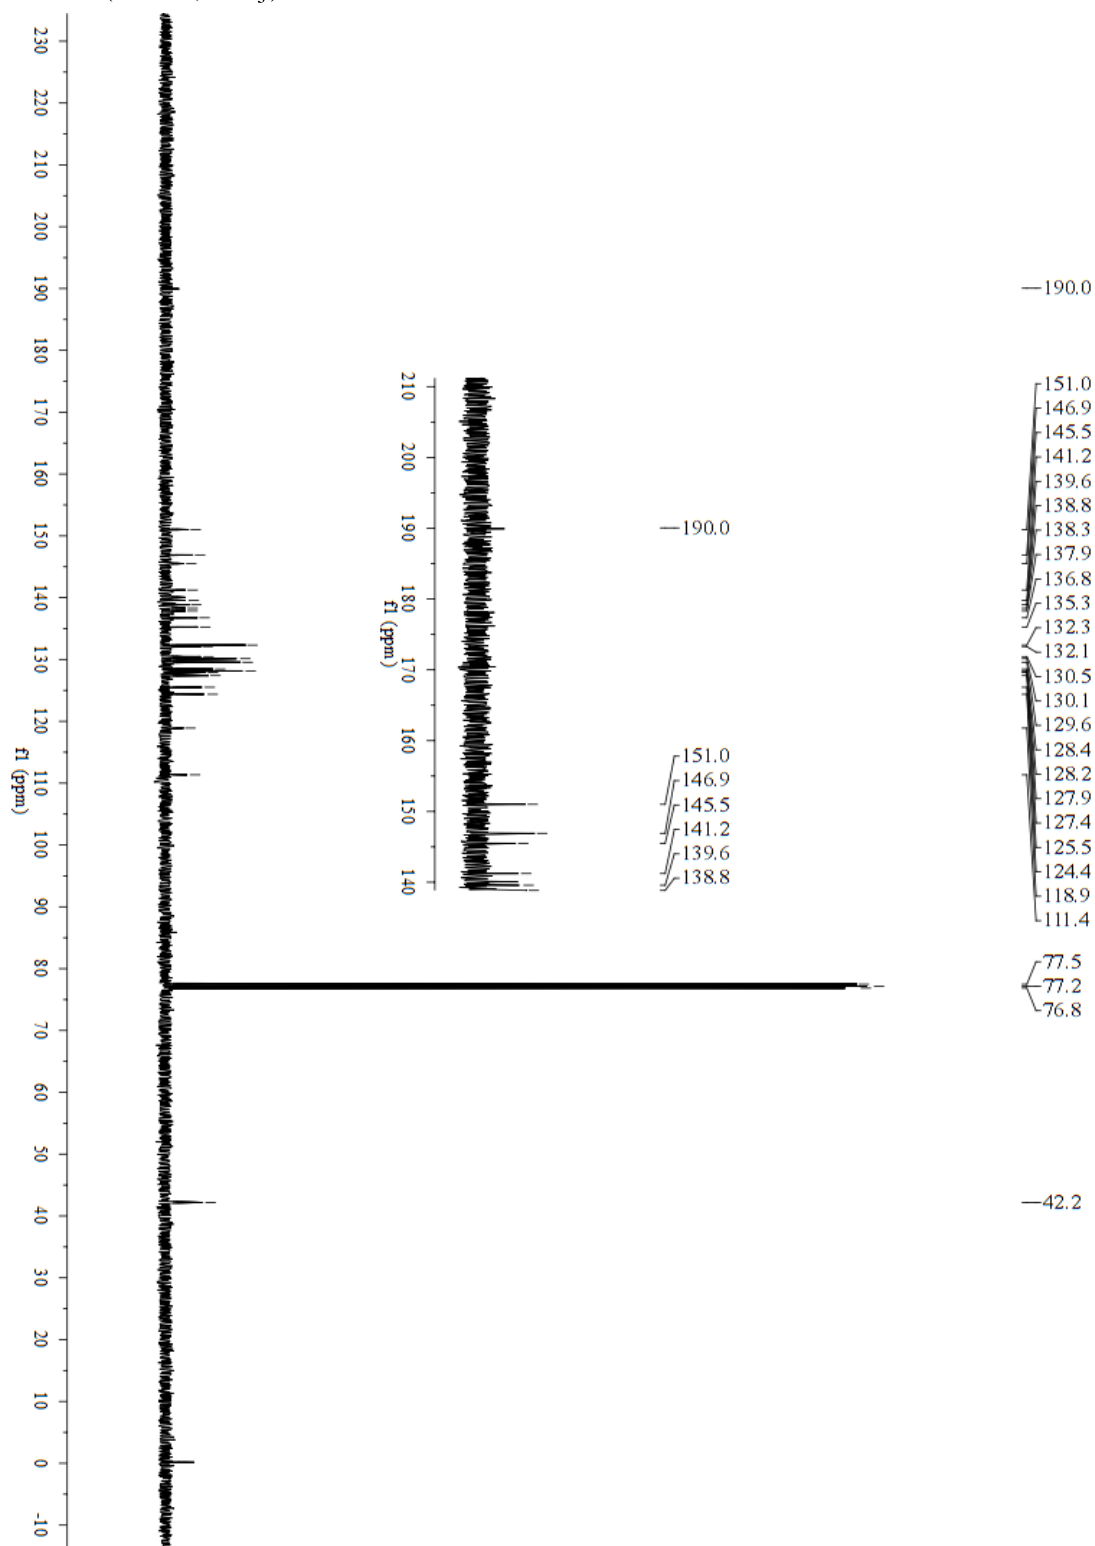

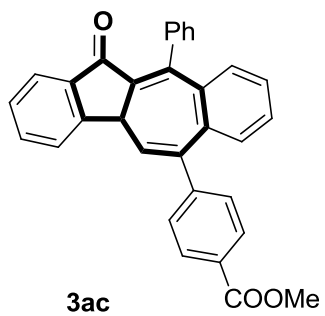

$^1\text{H NMR}$  (400 MHz,  $\text{CDCl}_3$ )

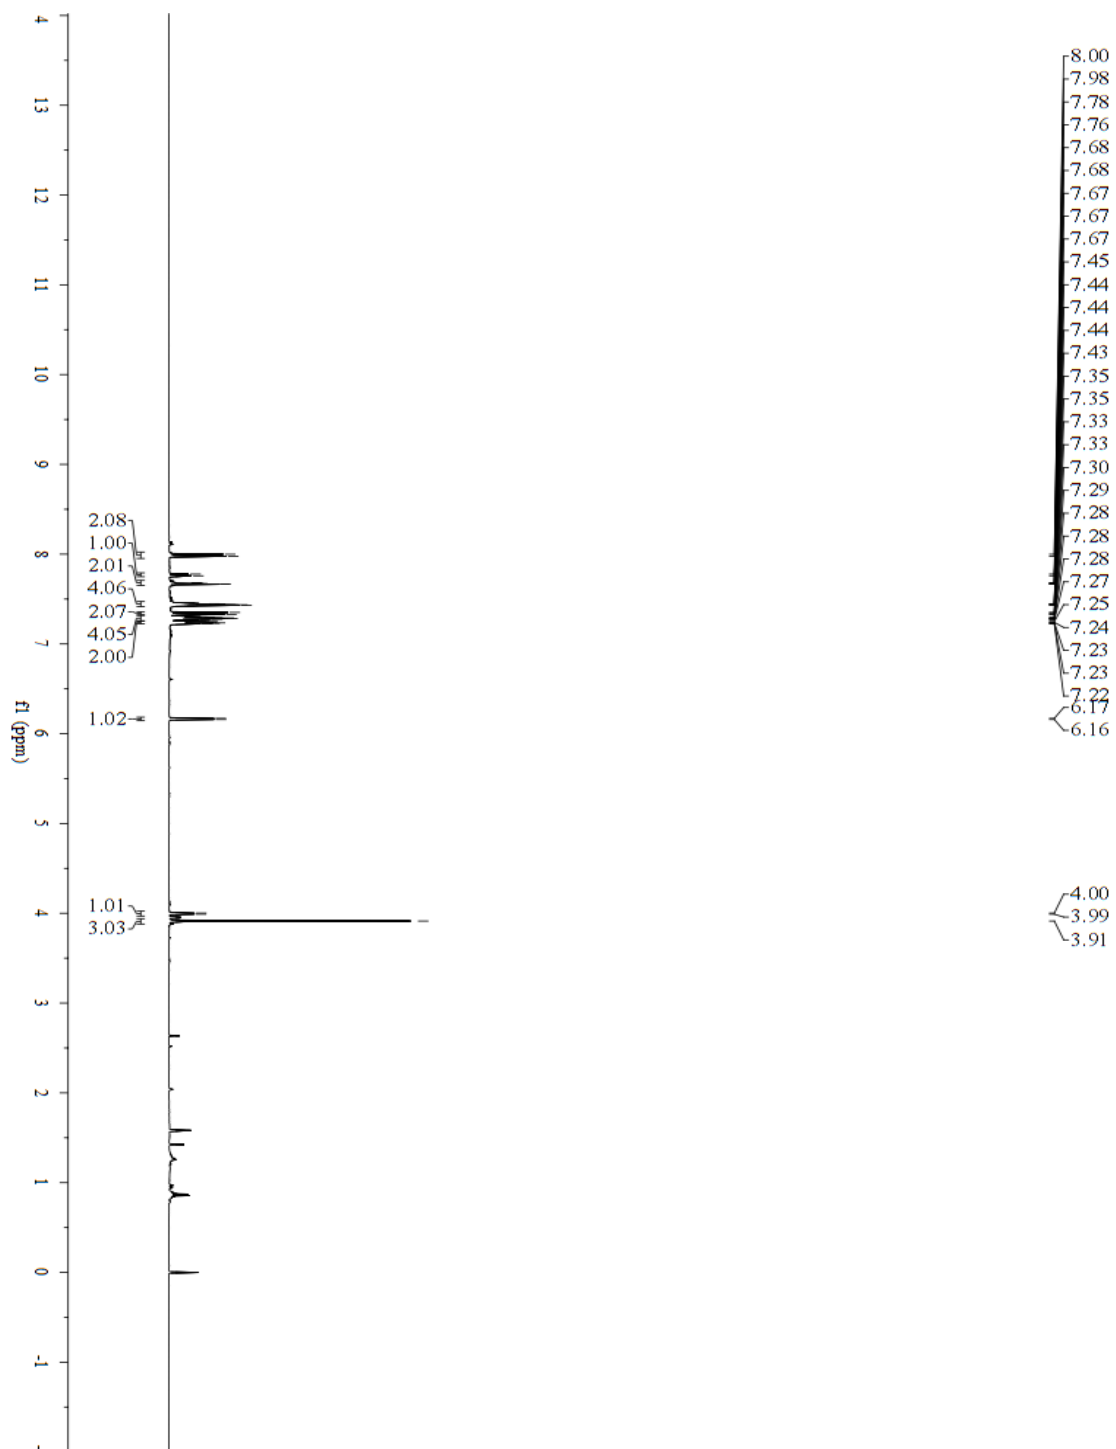

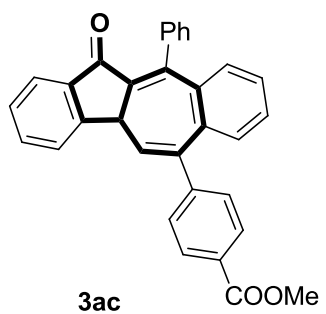

$^{13}\text{C}$  NMR (100 MHz,  $\text{CDCl}_3$ )

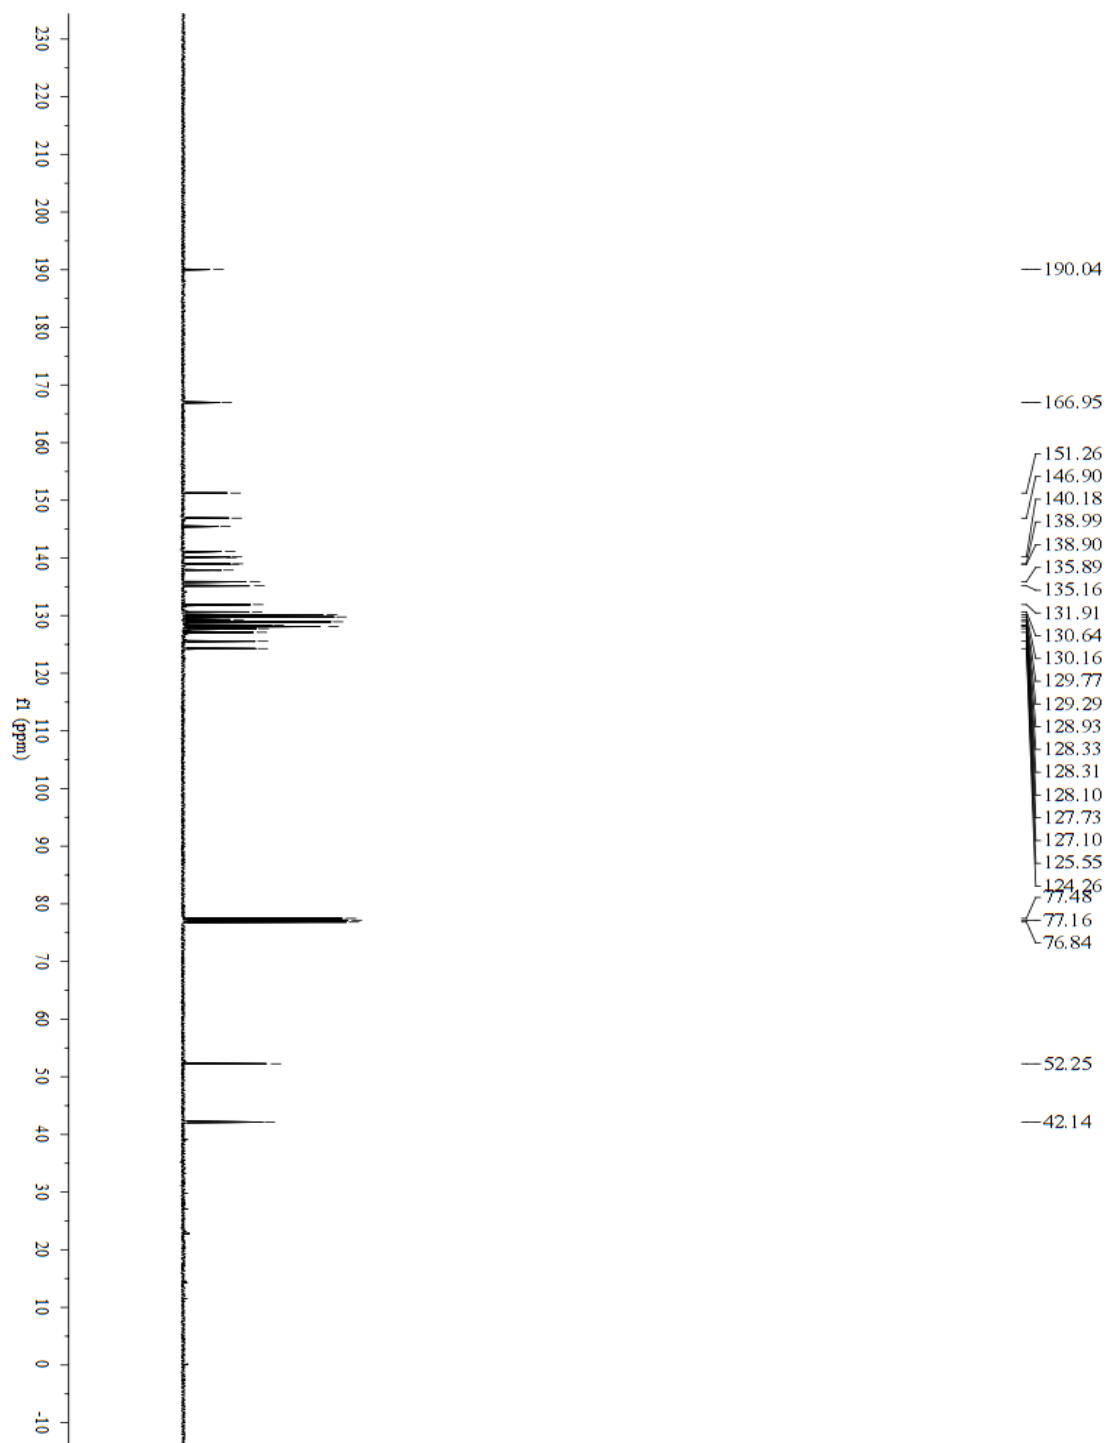

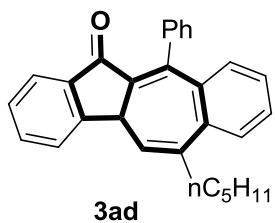

**3ad**

<sup>1</sup>H NMR (400 MHz, CDCl<sub>3</sub>)

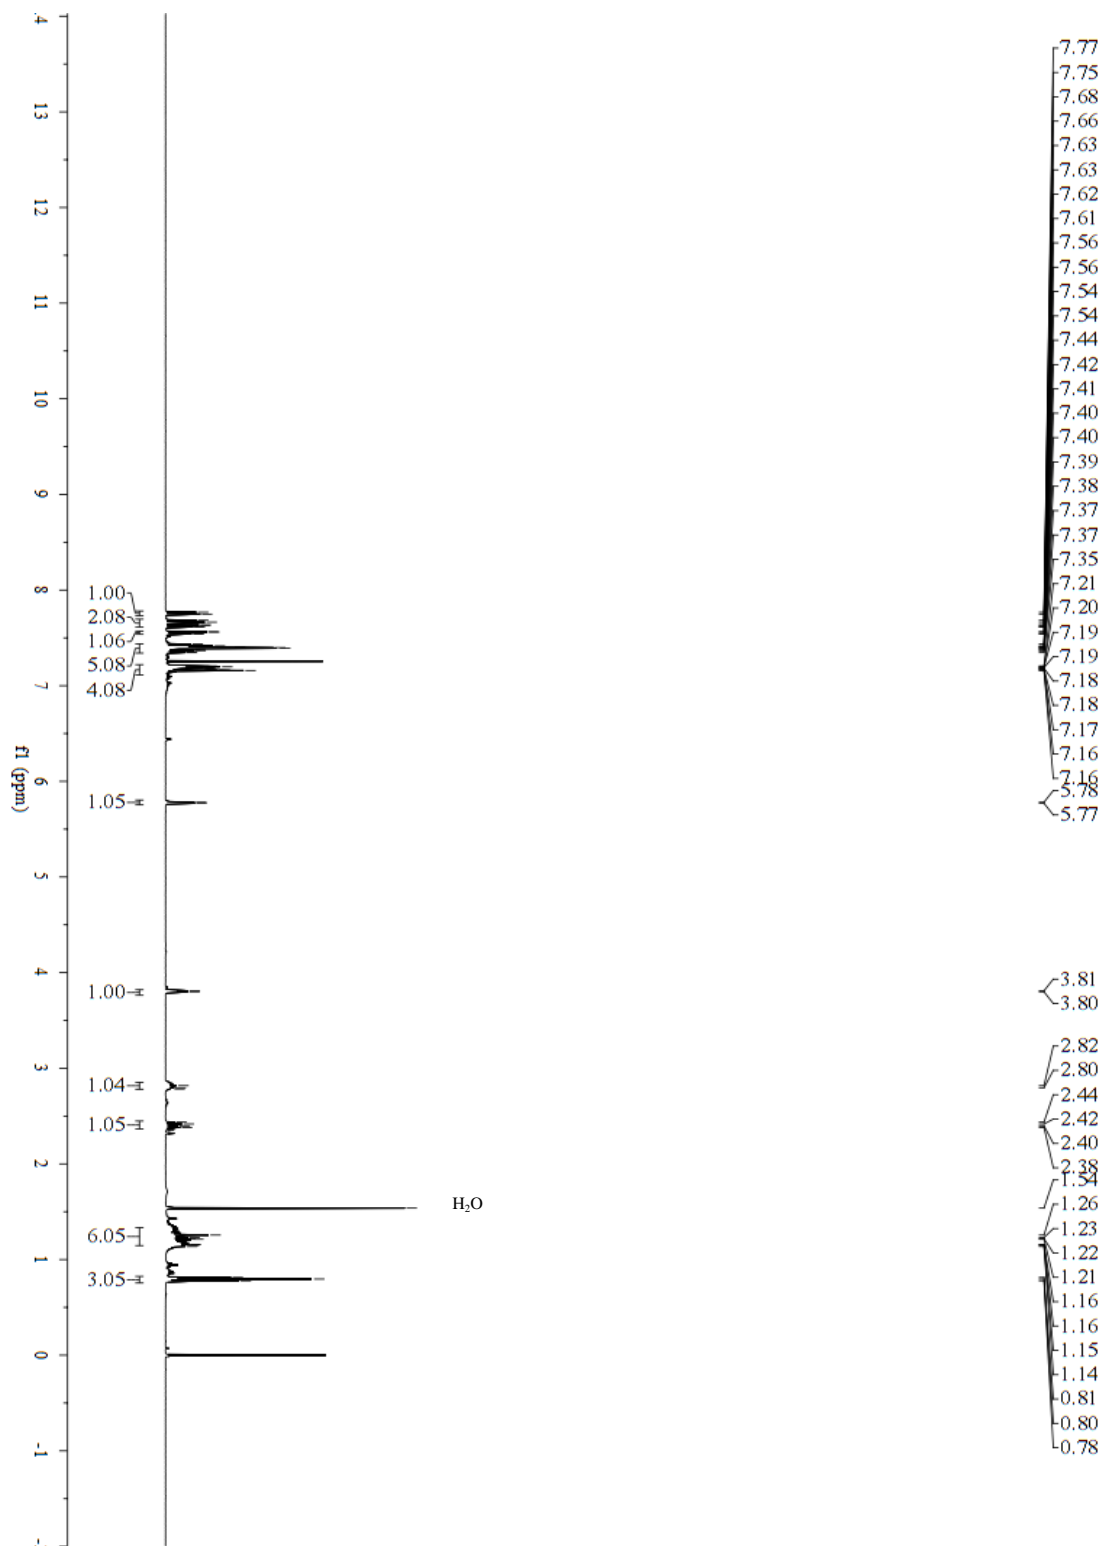

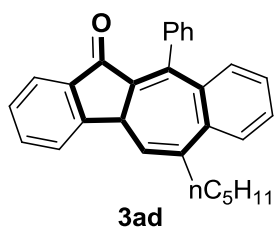

3ad

<sup>13</sup>C NMR (100 MHz, CDCl<sub>3</sub>)

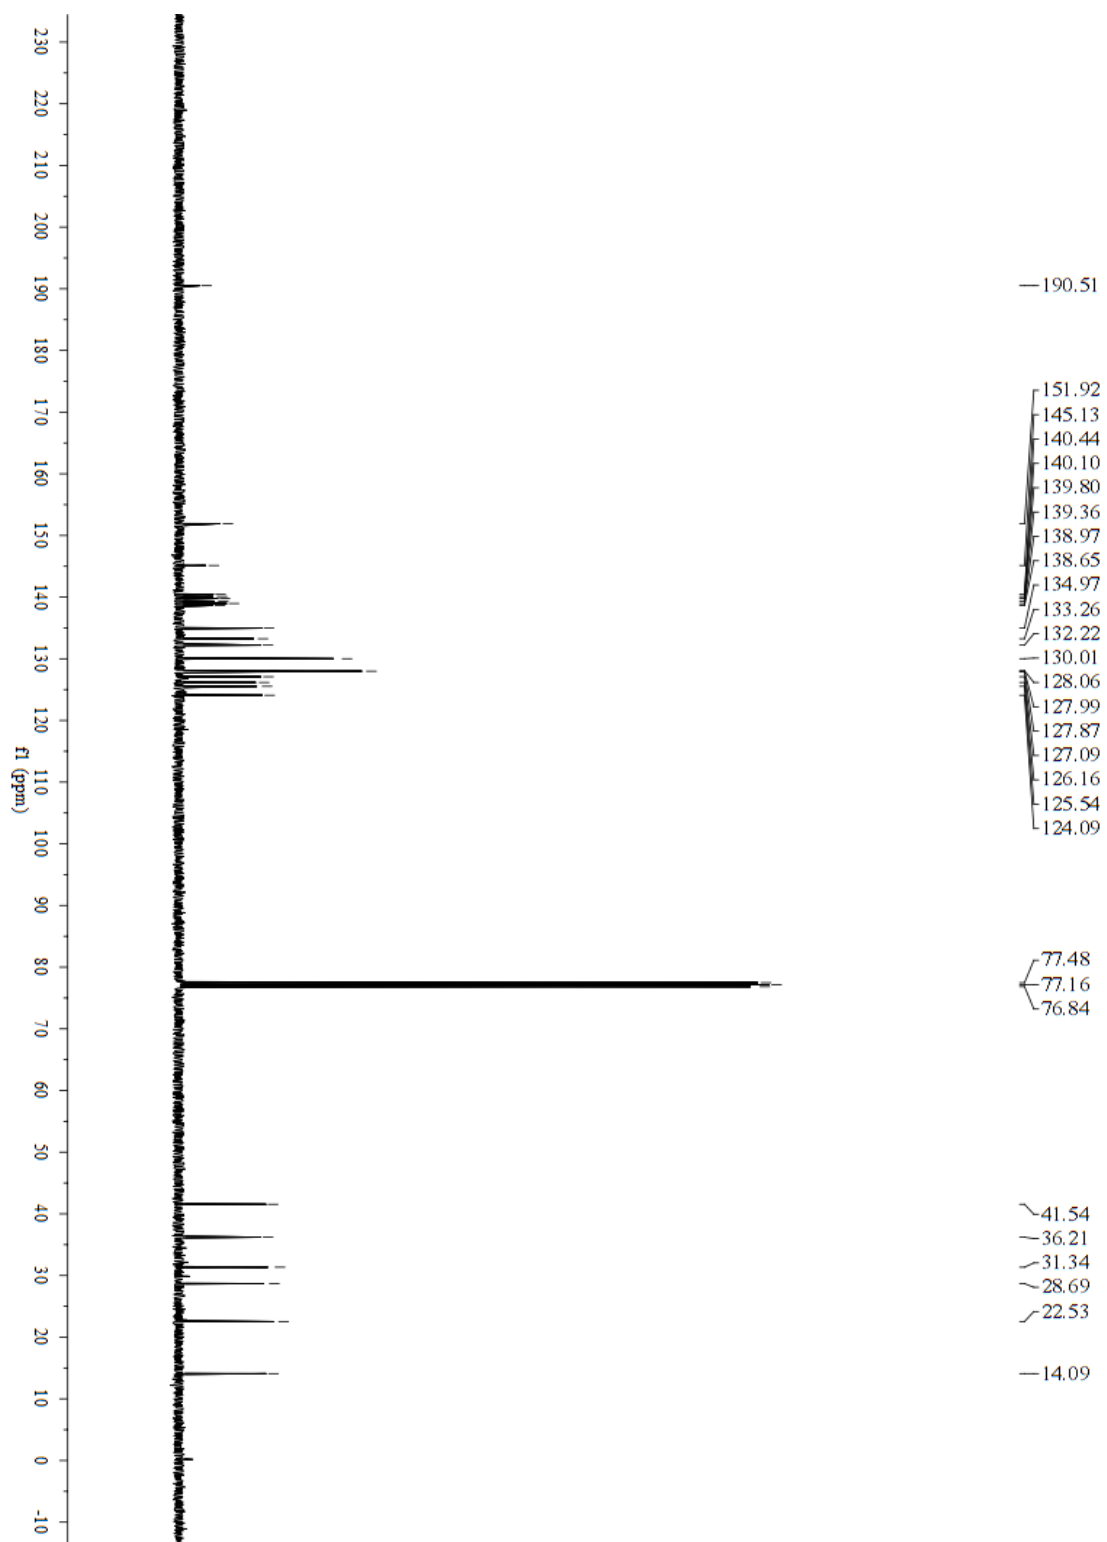

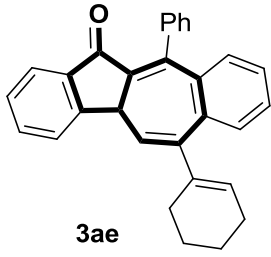

<sup>1</sup>H NMR (400 MHz, CDCl<sub>3</sub>)

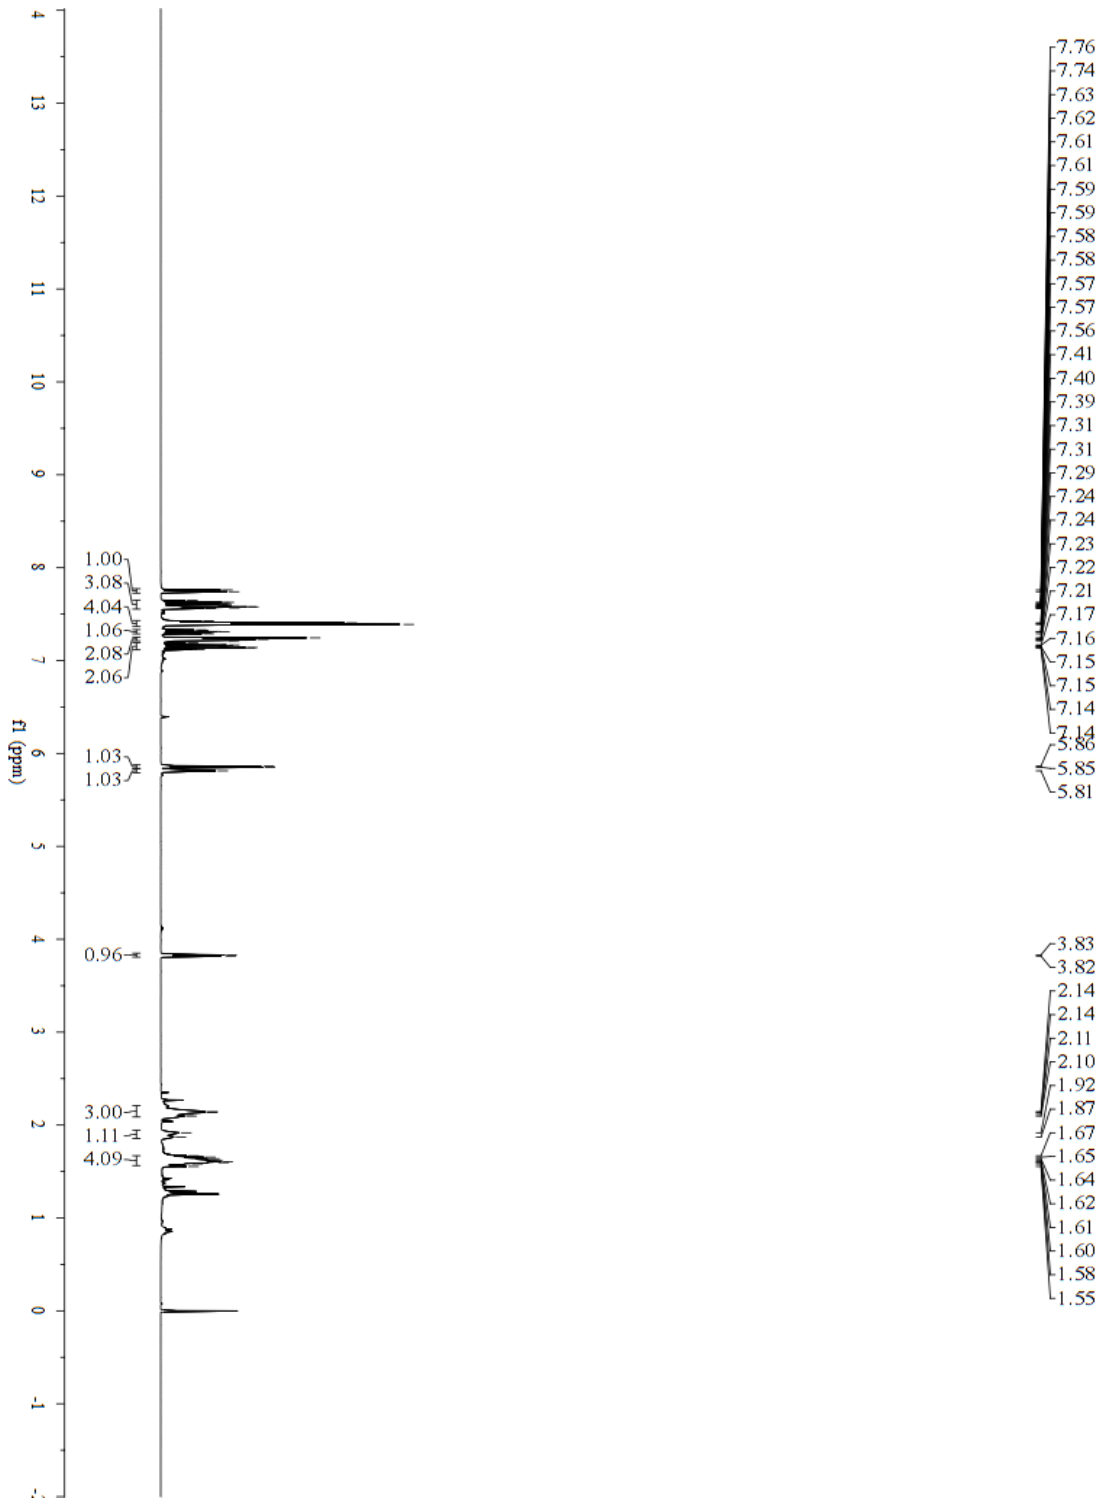

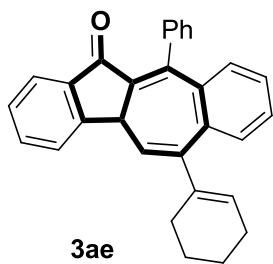

$^{13}\text{C}$  NMR (100 MHz,  $\text{CDCl}_3$ )

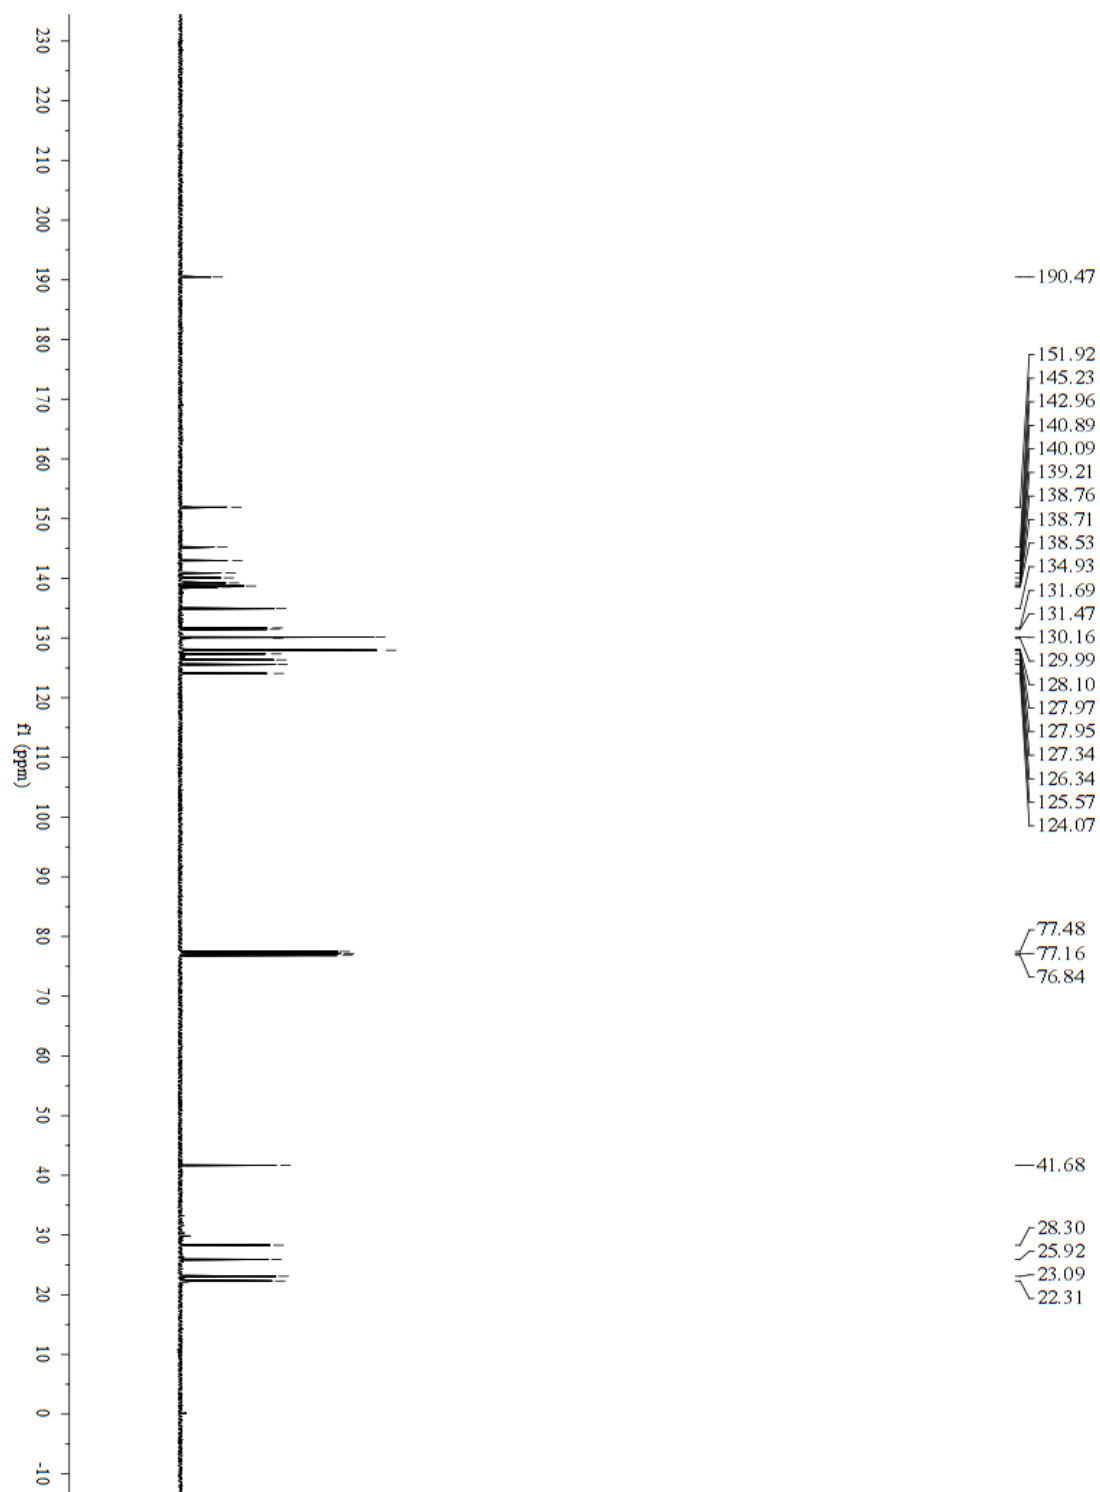



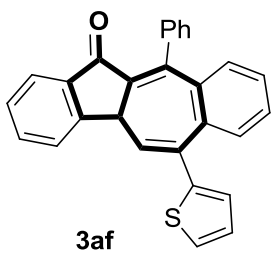

<sup>1</sup>H NMR (400 MHz, CDCl<sub>3</sub>)

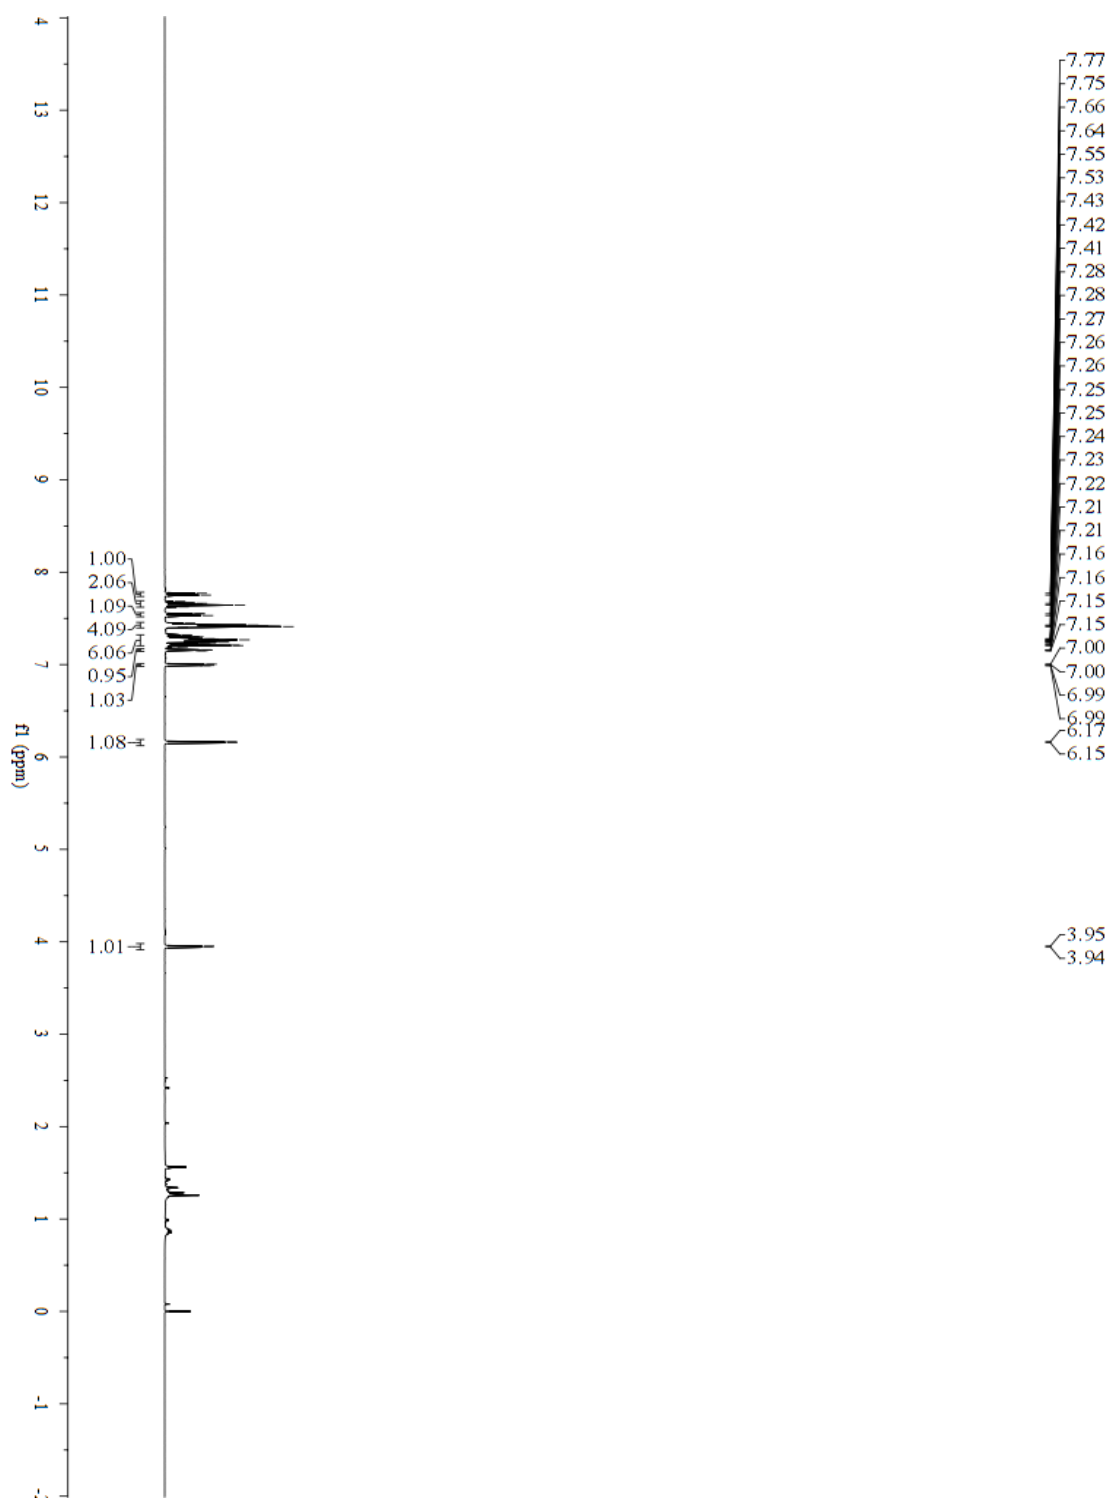



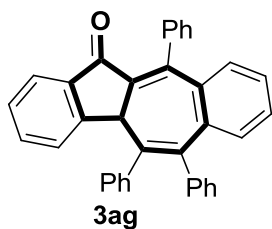

<sup>1</sup>H NMR (400 MHz, CDCl<sub>3</sub>)

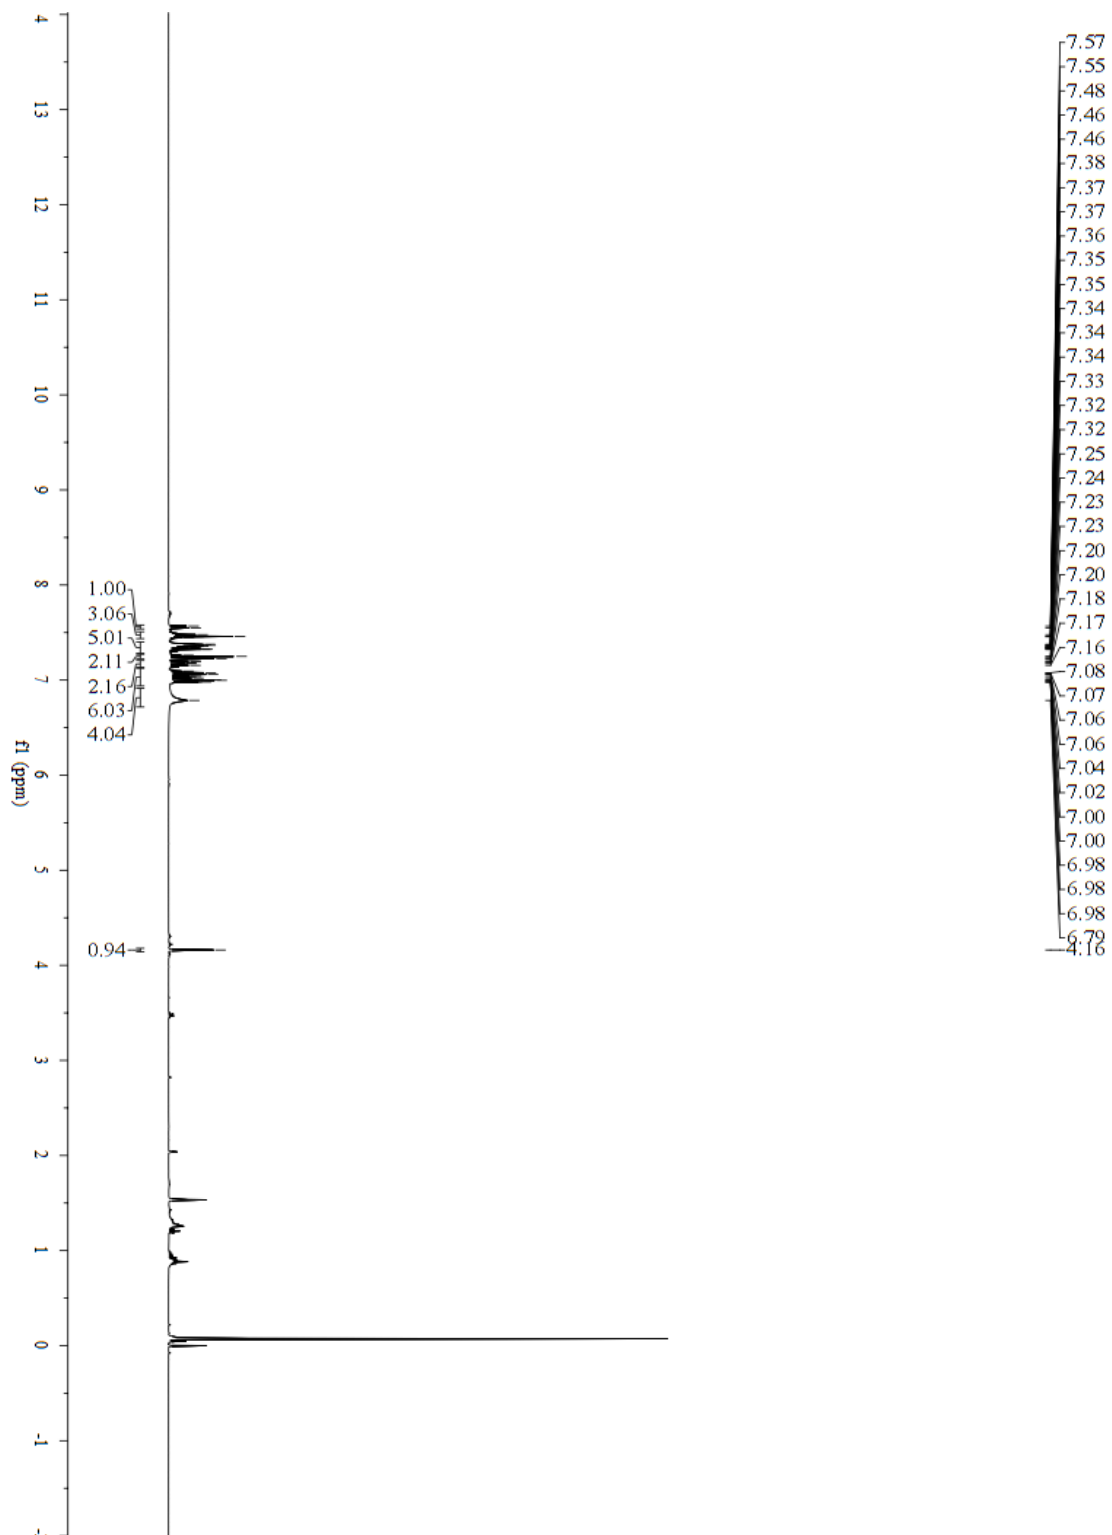

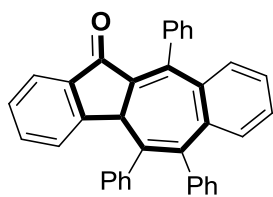

**3ag**

$^{13}\text{C}$  NMR (100 MHz,  $\text{CDCl}_3$ )

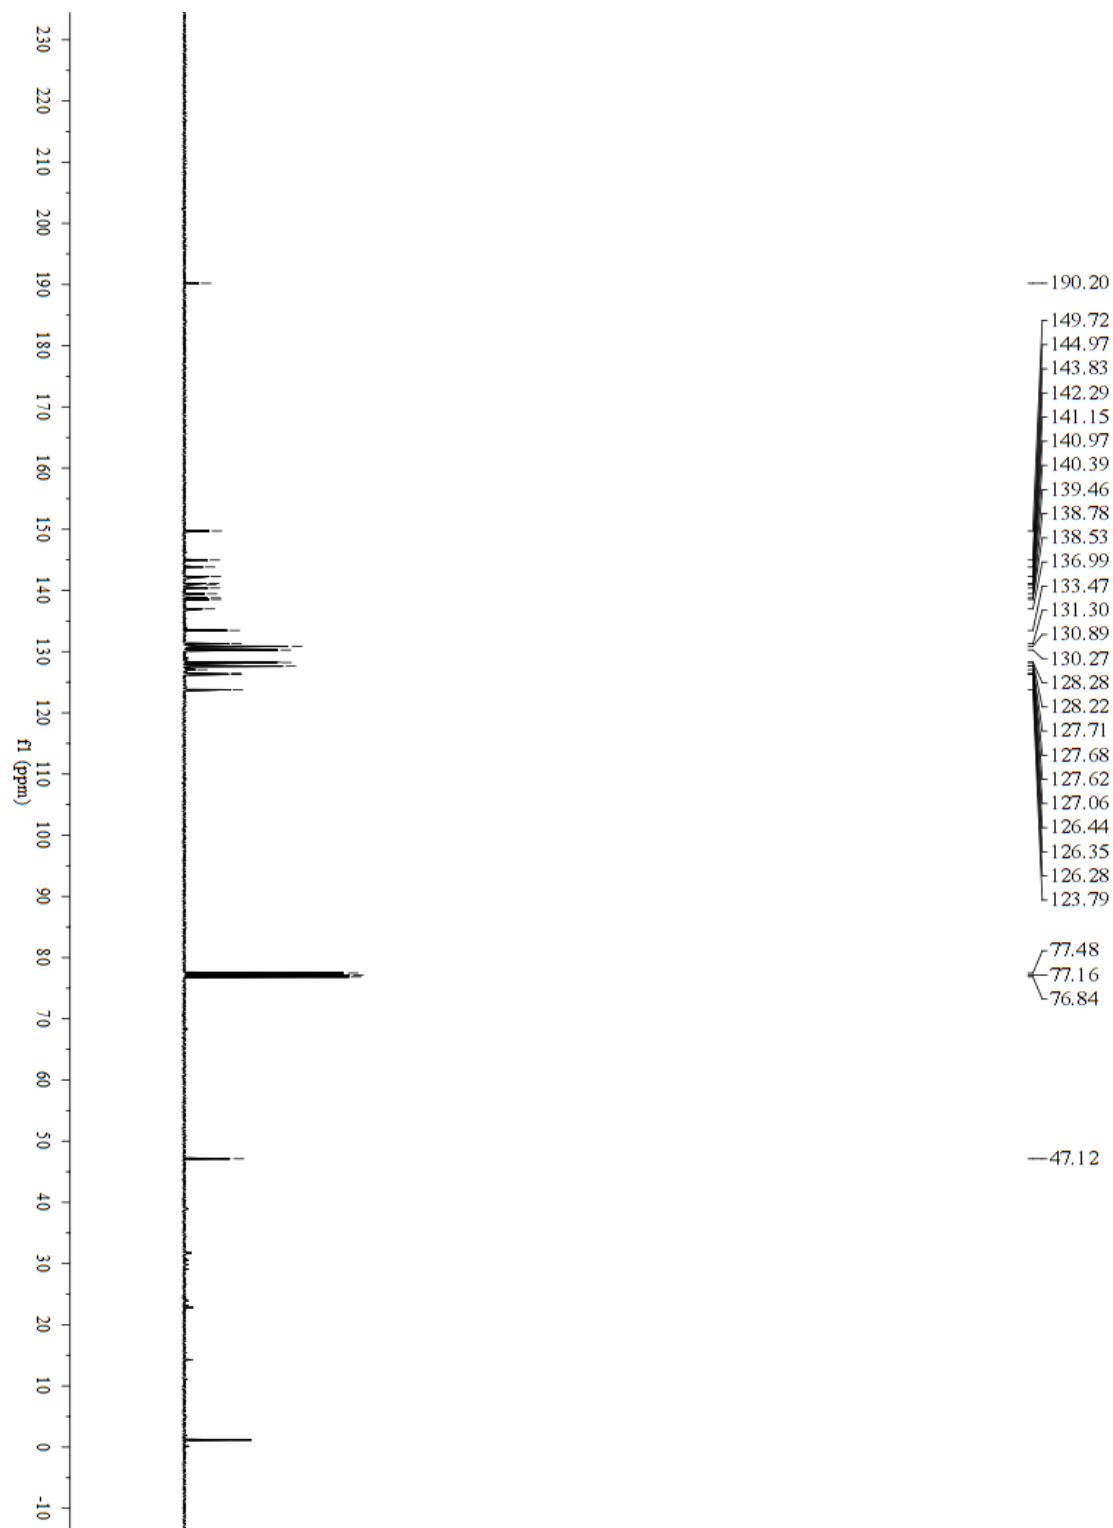

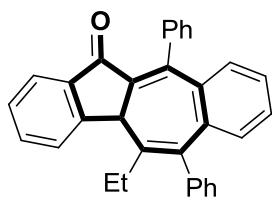

**3ah**

$^1\text{H NMR}$  (400 MHz,  $\text{CDCl}_3$ )

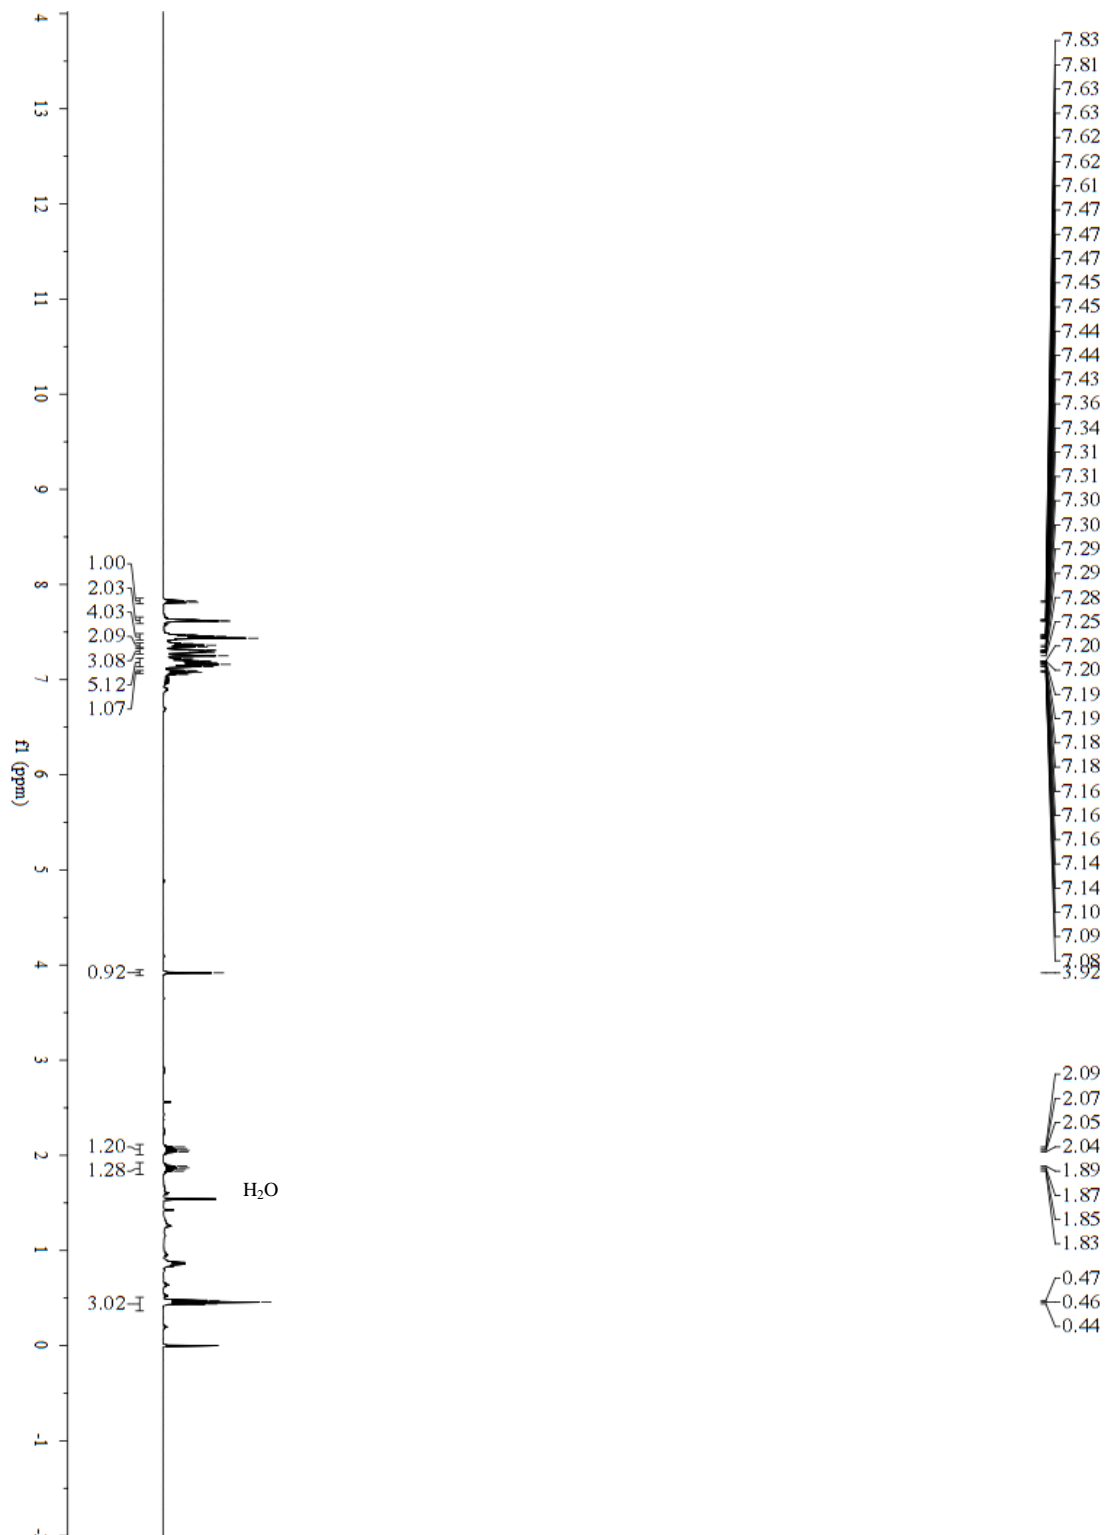

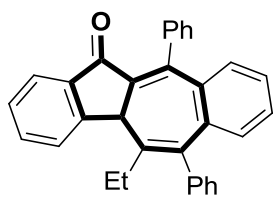

**3ah**

$^{13}\text{C}$  NMR (100 MHz,  $\text{CDCl}_3$ )

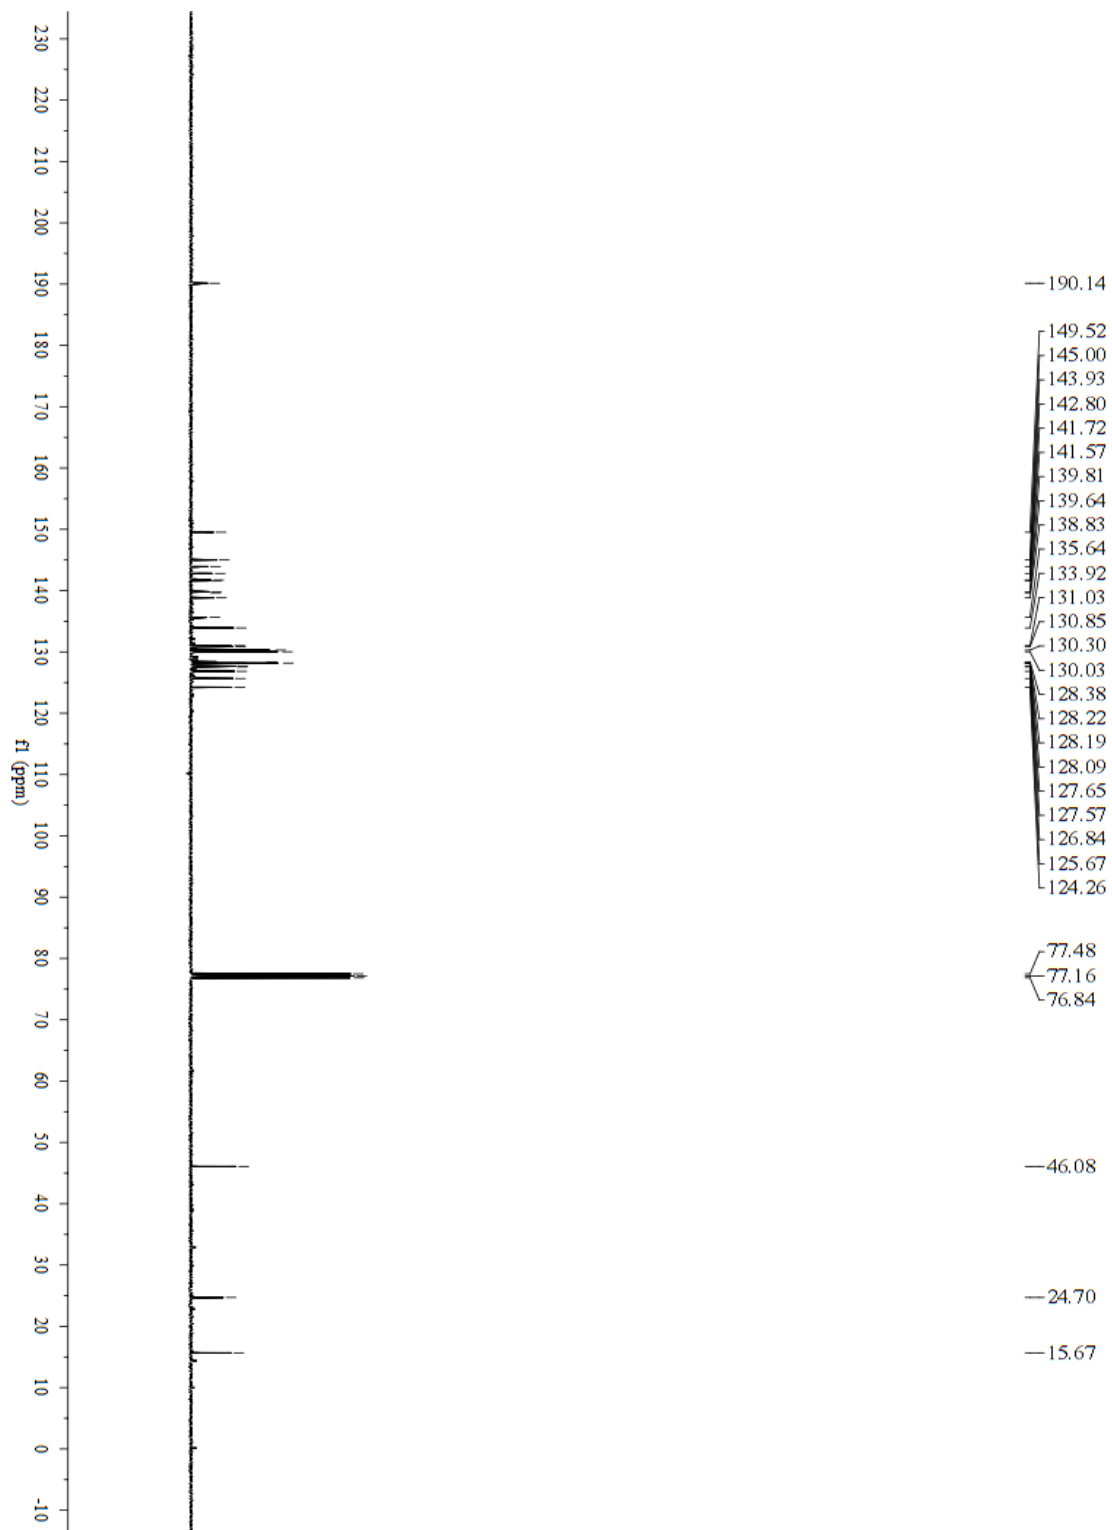

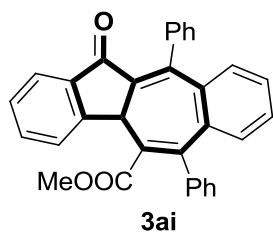

<sup>1</sup>H NMR (400 MHz, CDCl<sub>3</sub>)

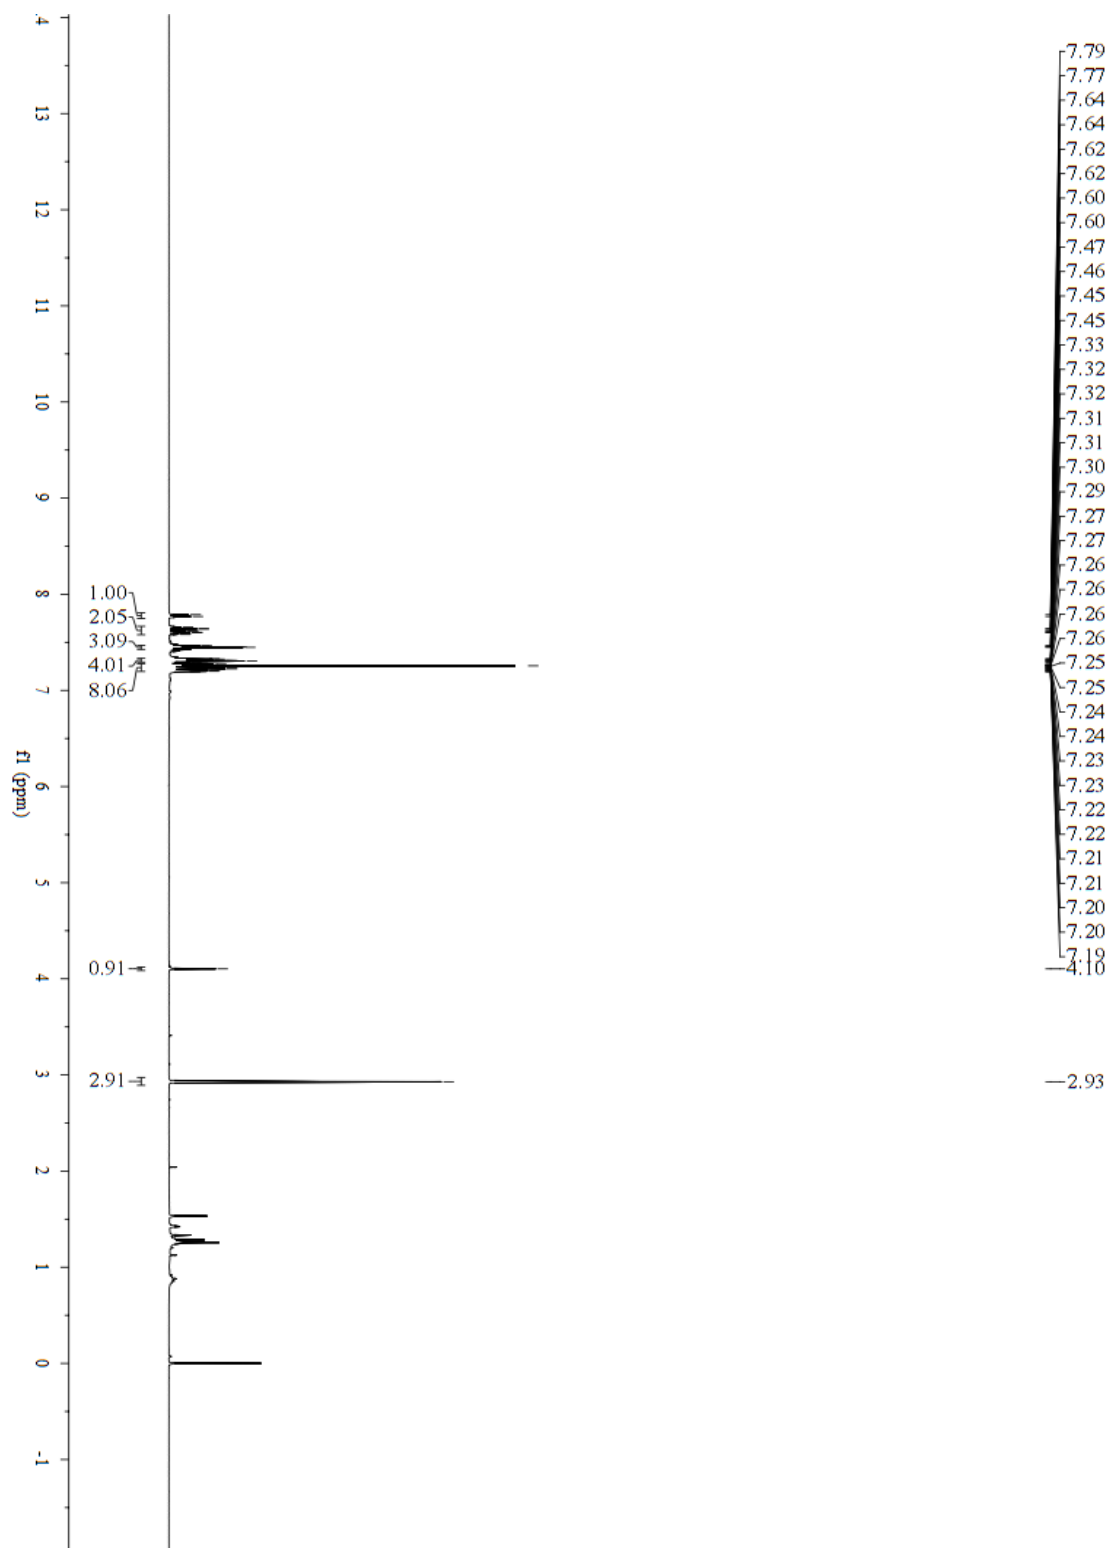

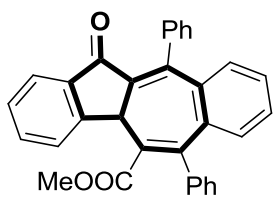

**3ai**

$^{13}\text{C}$  NMR (100 MHz,  $\text{CDCl}_3$ )

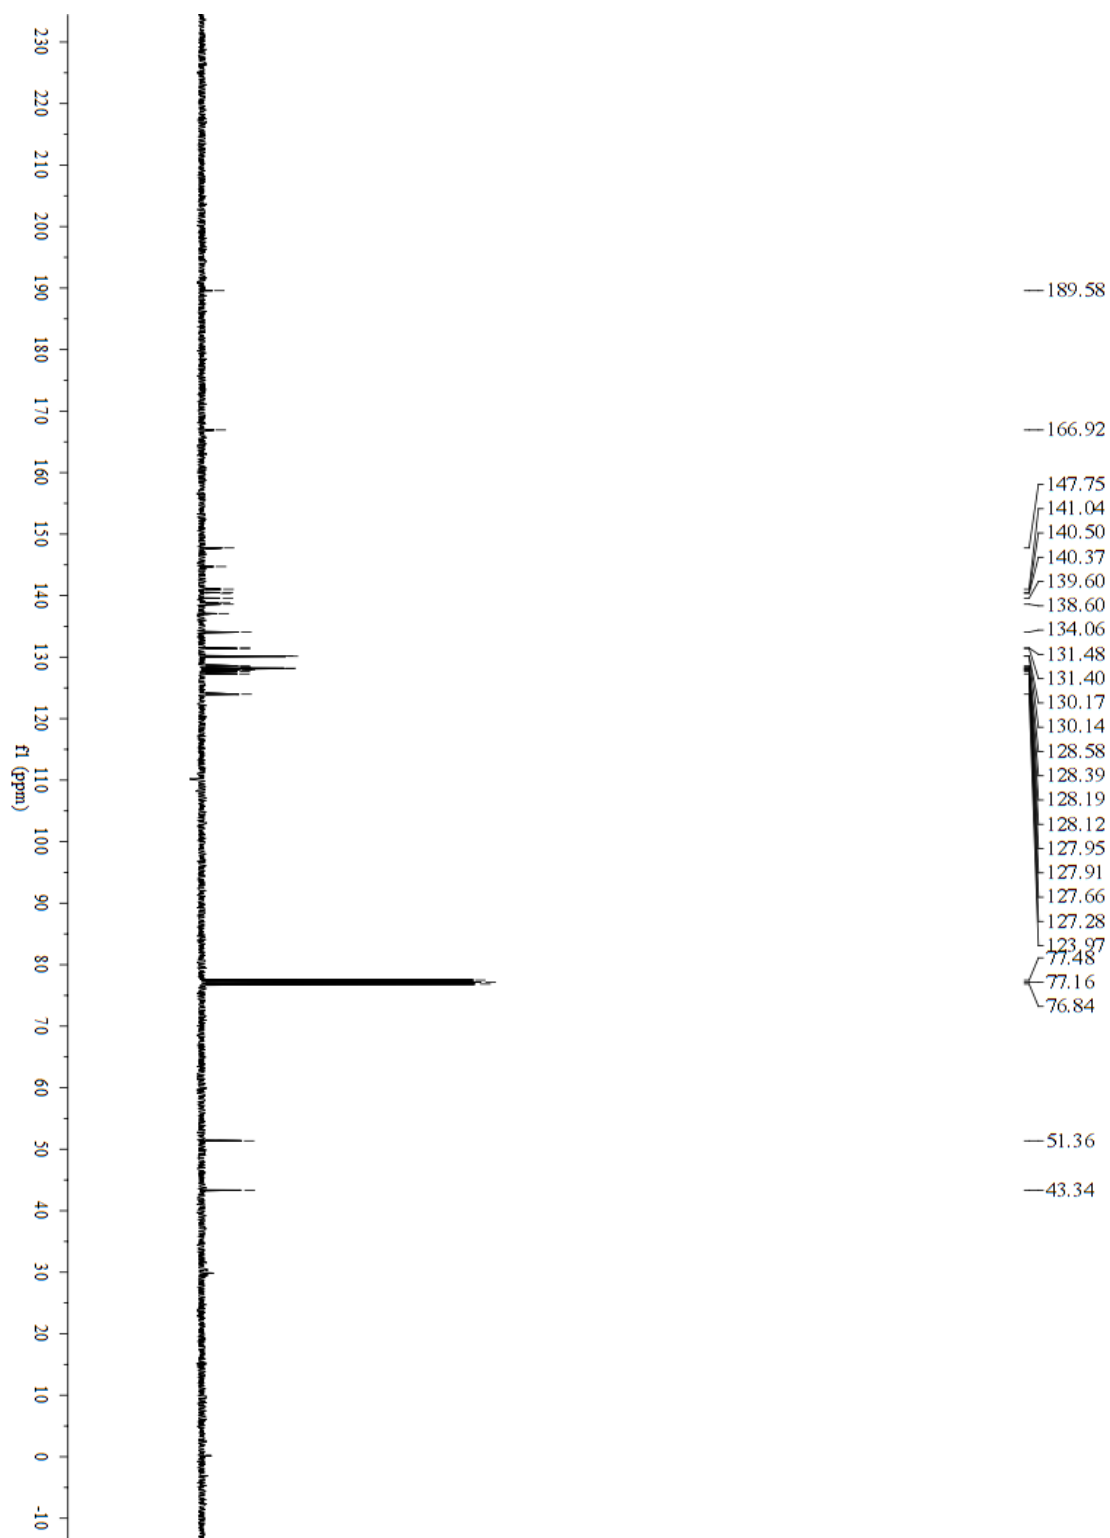



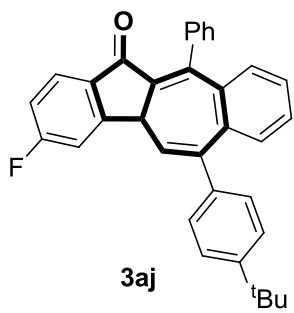

<sup>1</sup>H NMR (400 MHz, acetone)

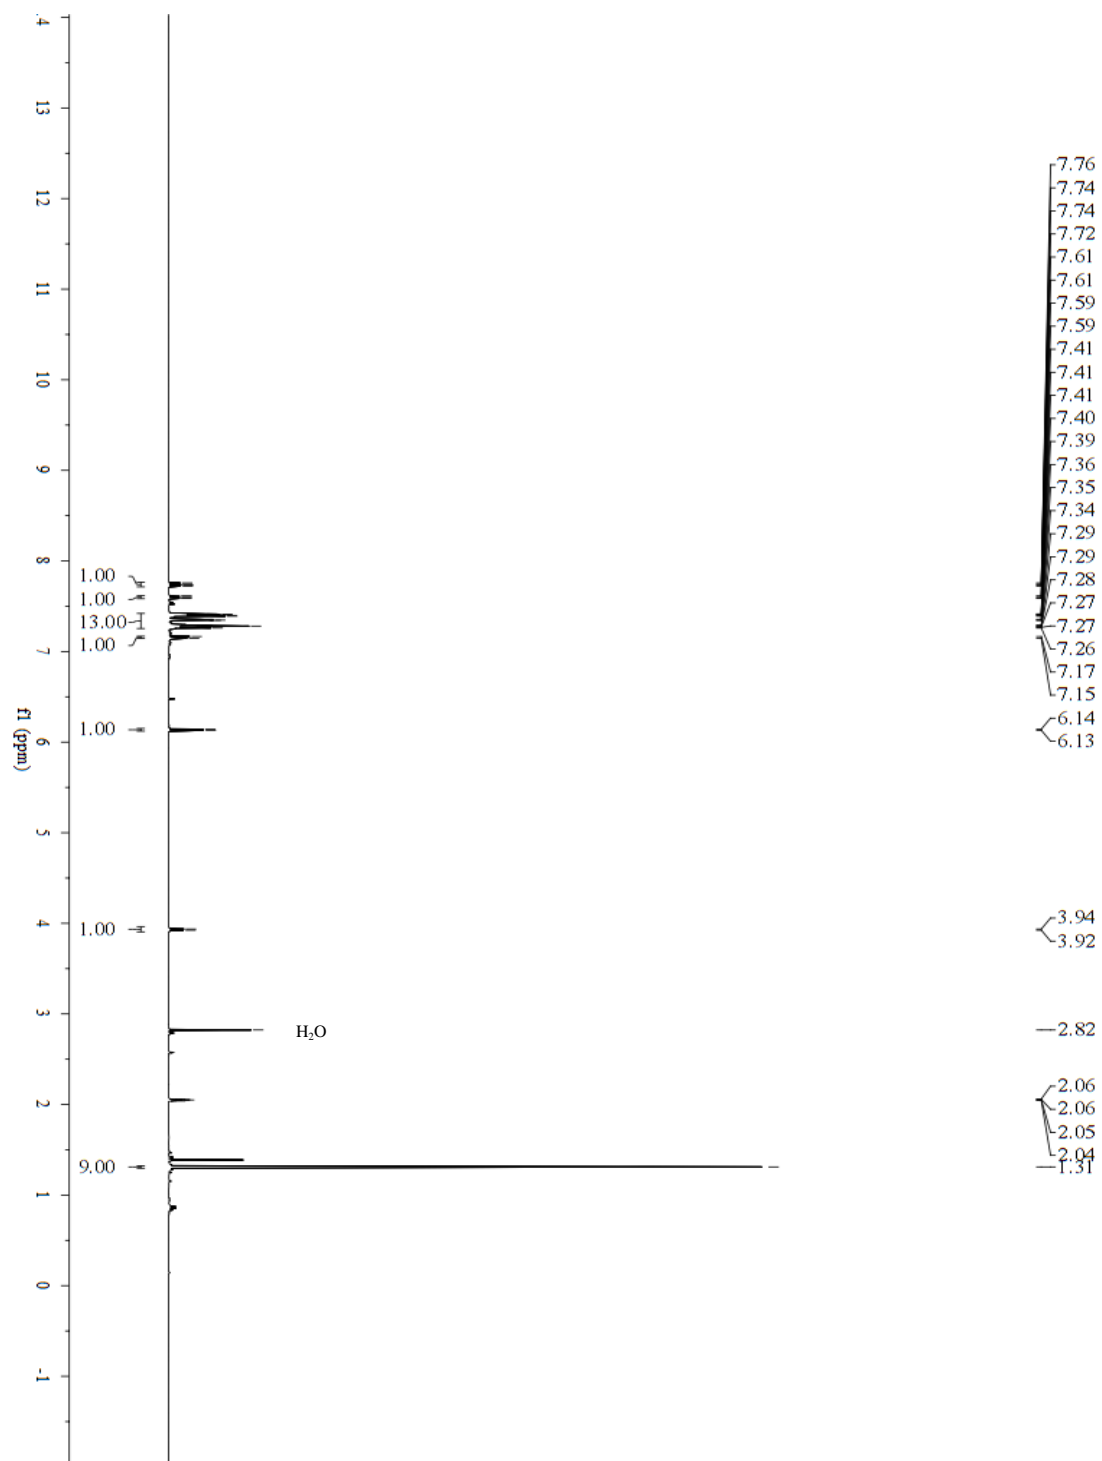

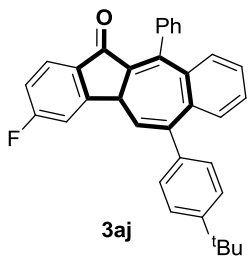

$^{13}\text{C}$  NMR (100 MHz, acetone)

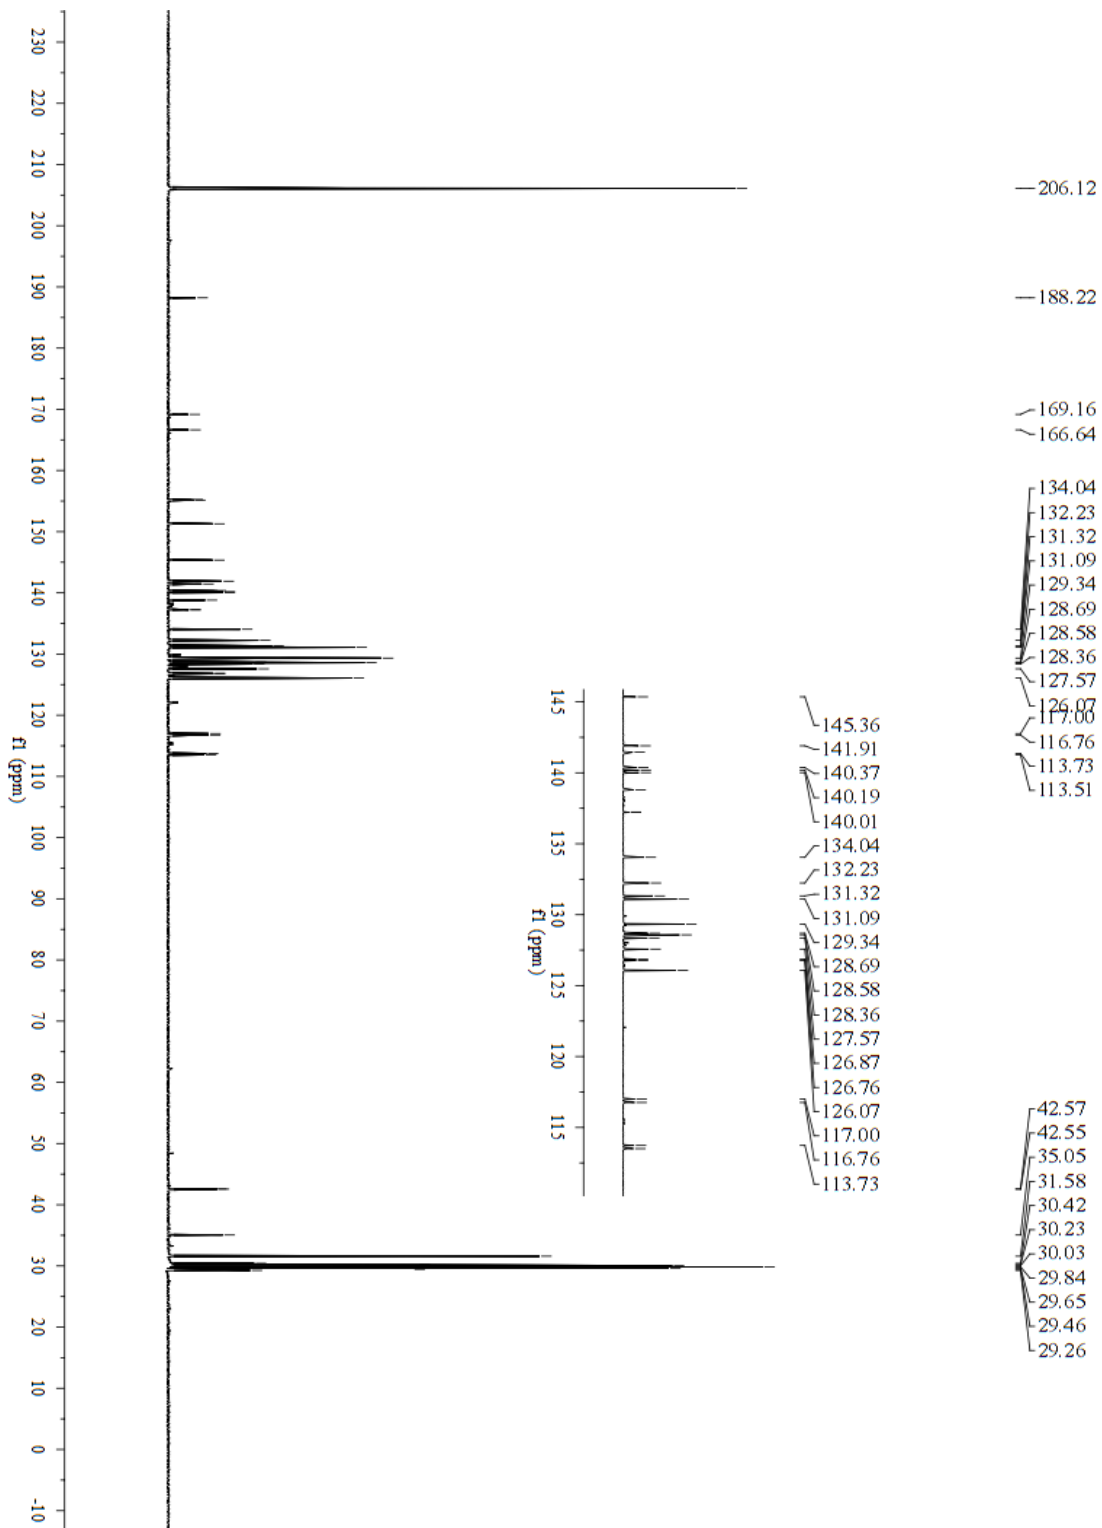

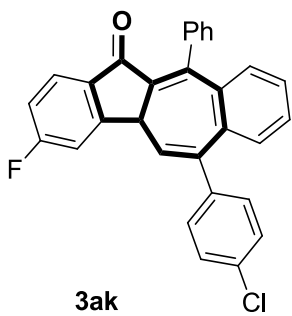

<sup>1</sup>H NMR (400 MHz, acetone)

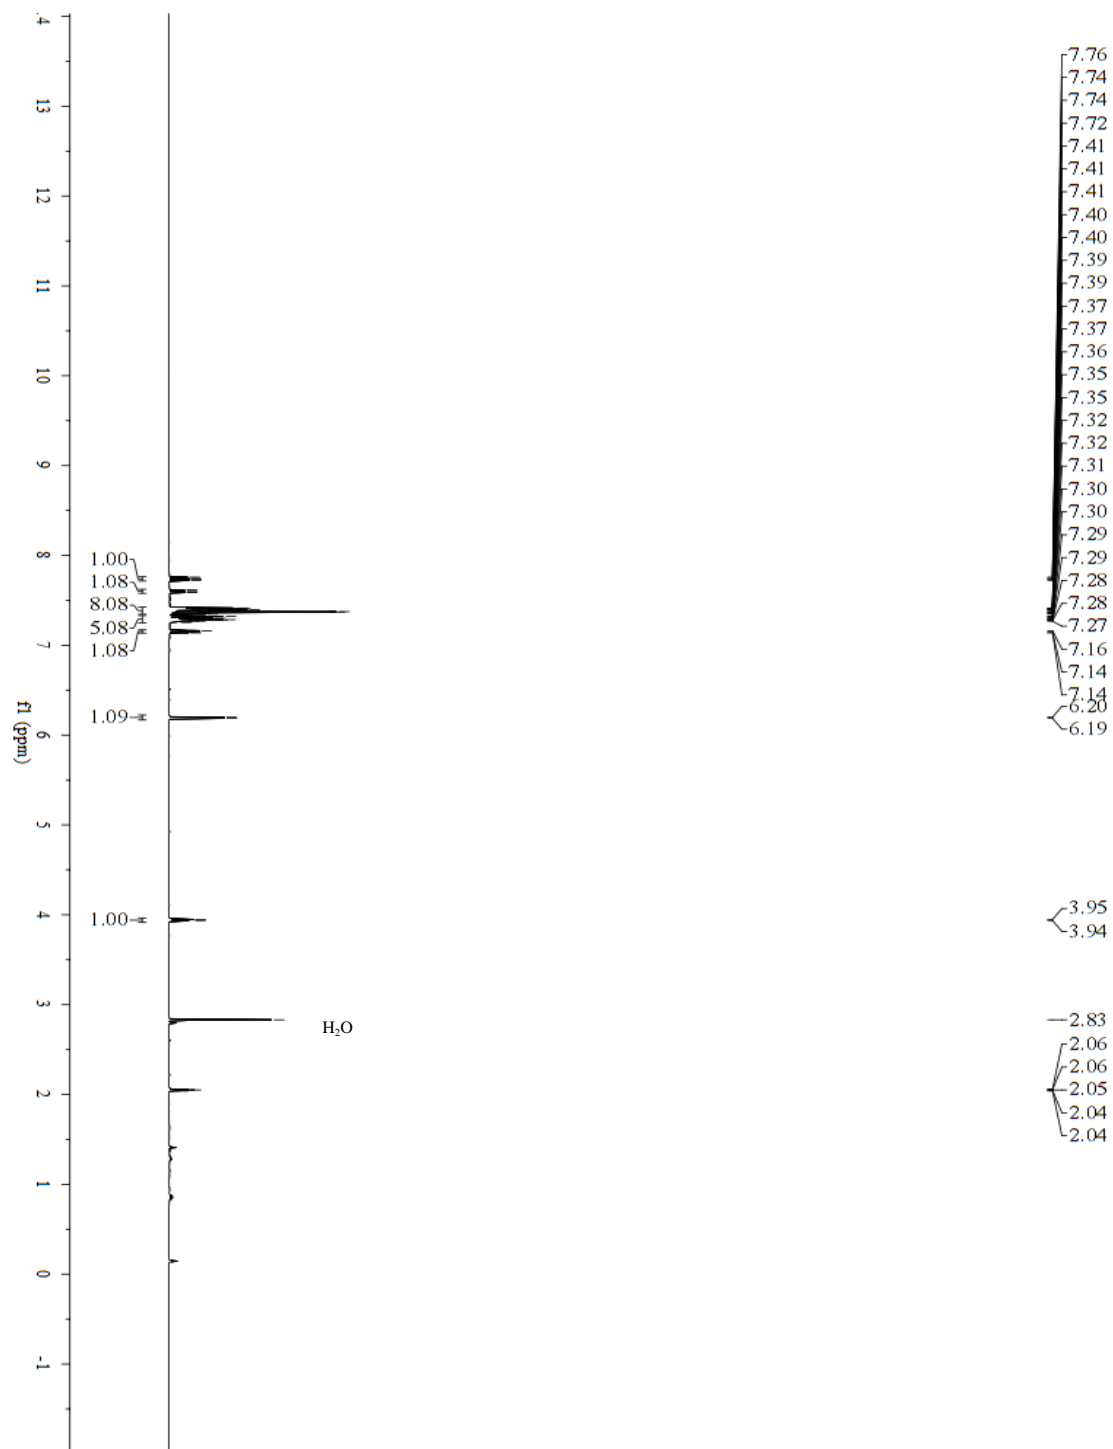

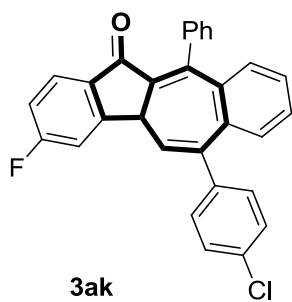

$^{13}\text{C}$  NMR (100 MHz, acetone)

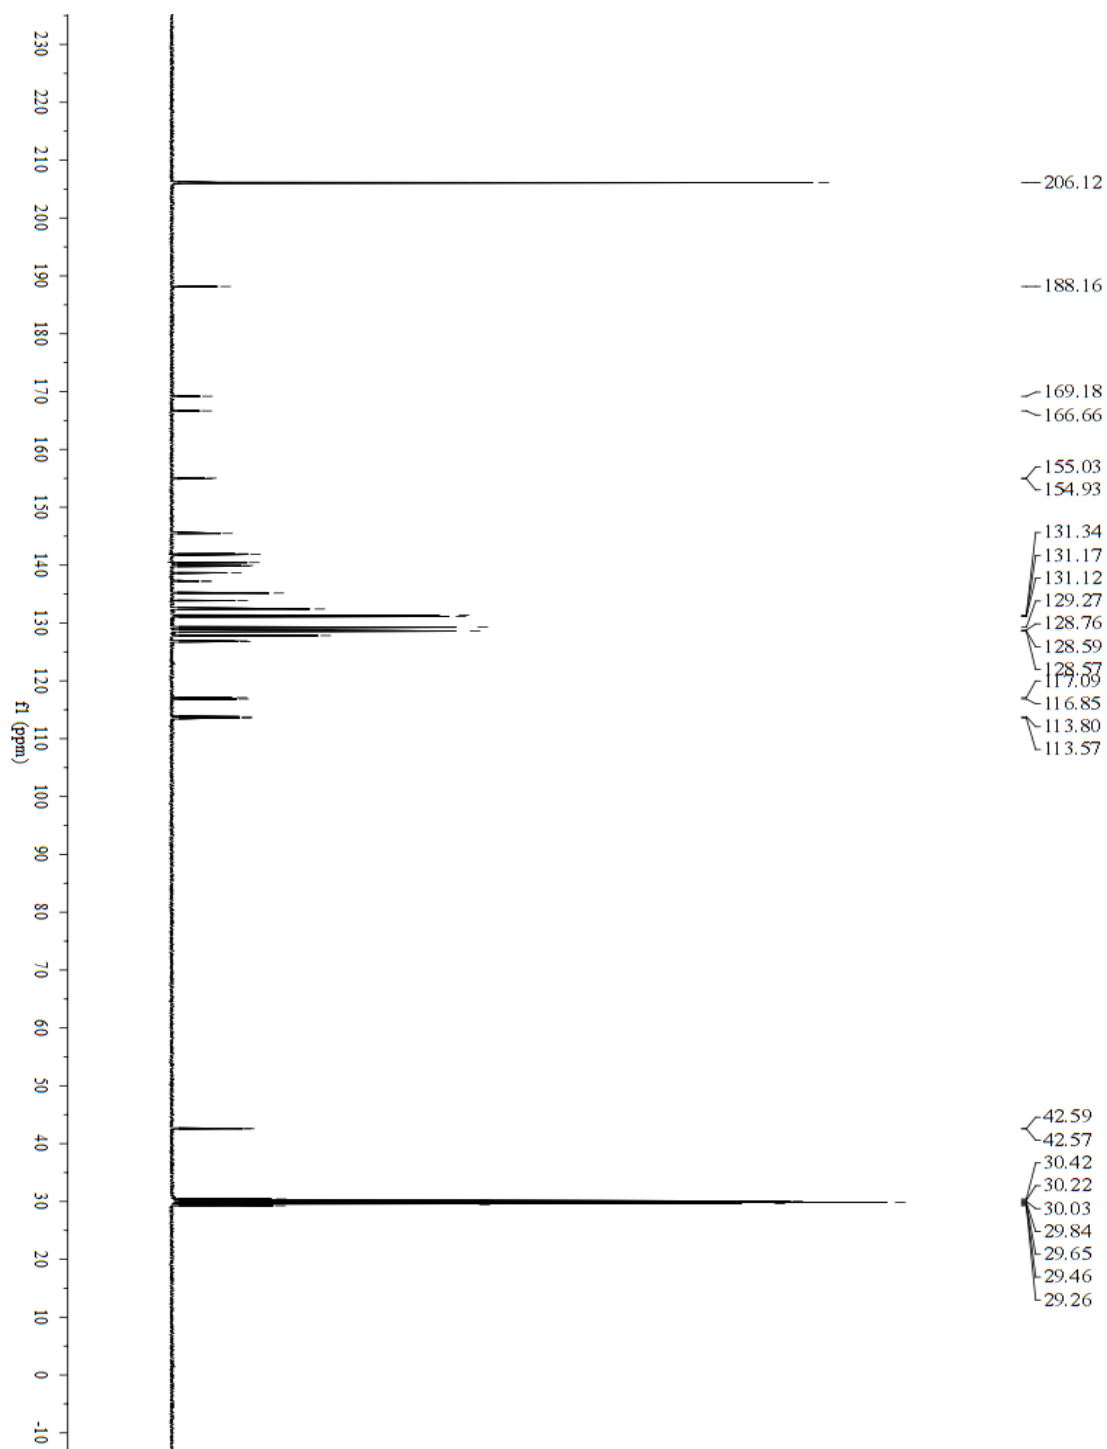

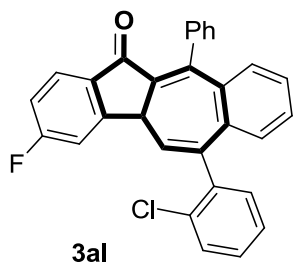

<sup>1</sup>H NMR (400 MHz, acetone)

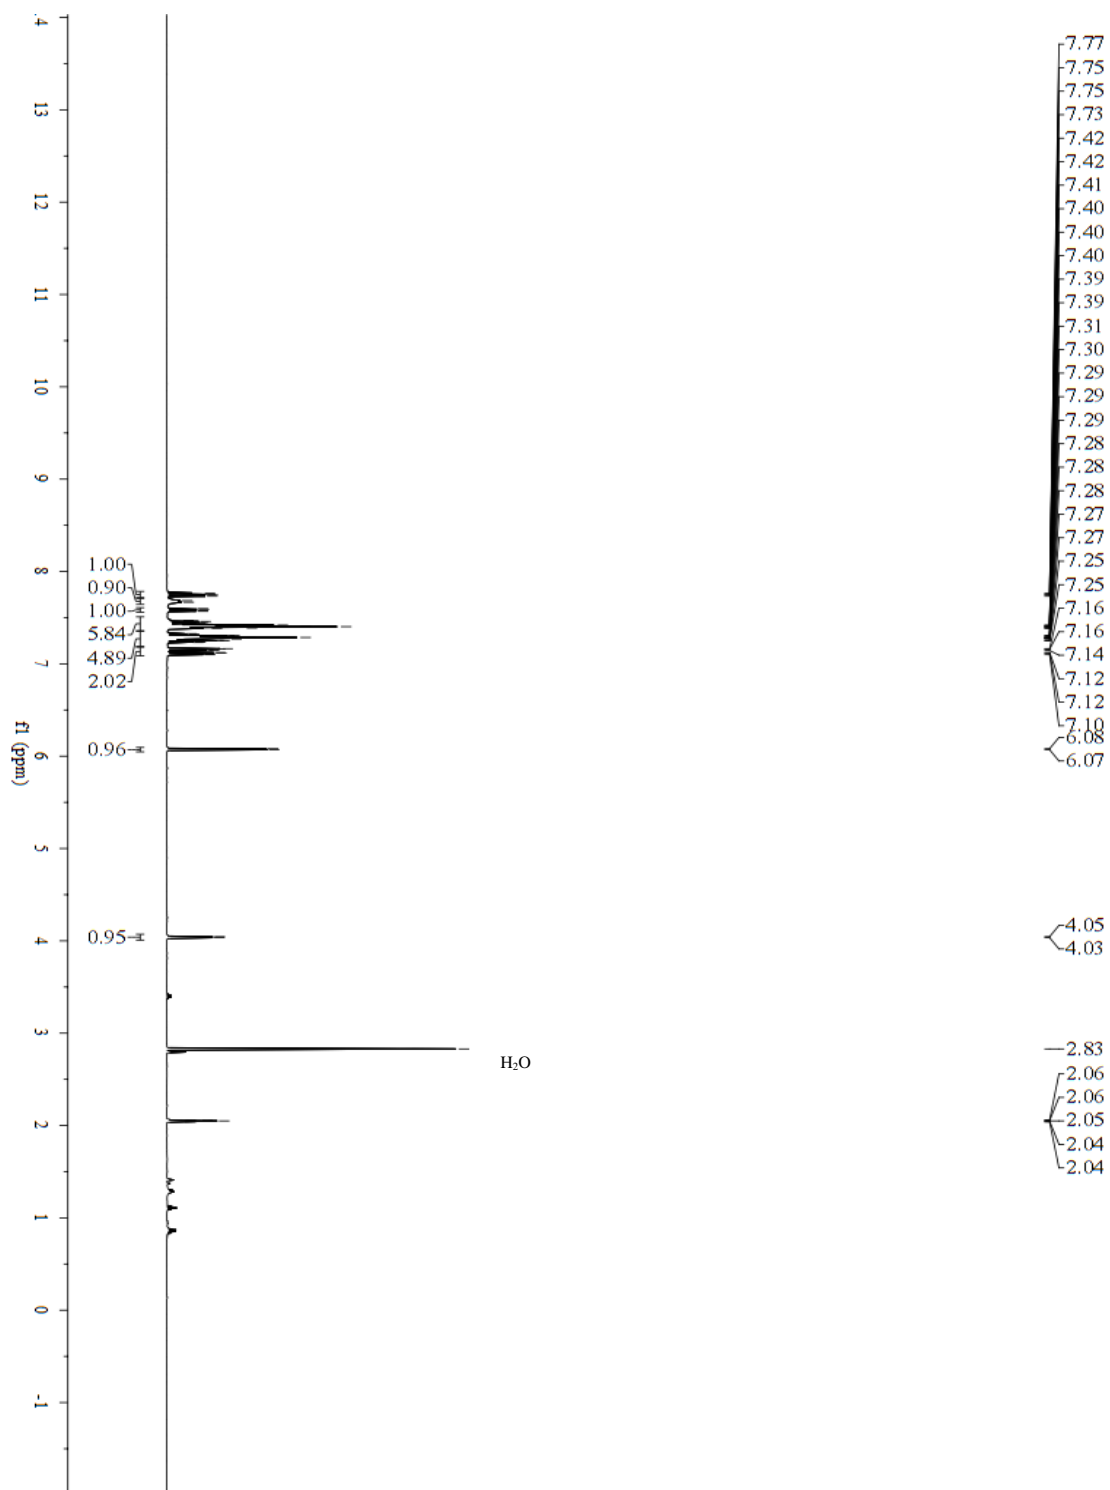

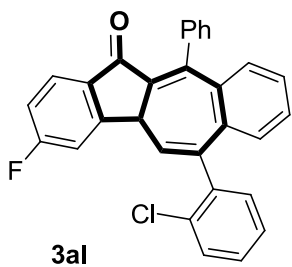

$^{13}\text{C}$  NMR (100 MHz, acetone)

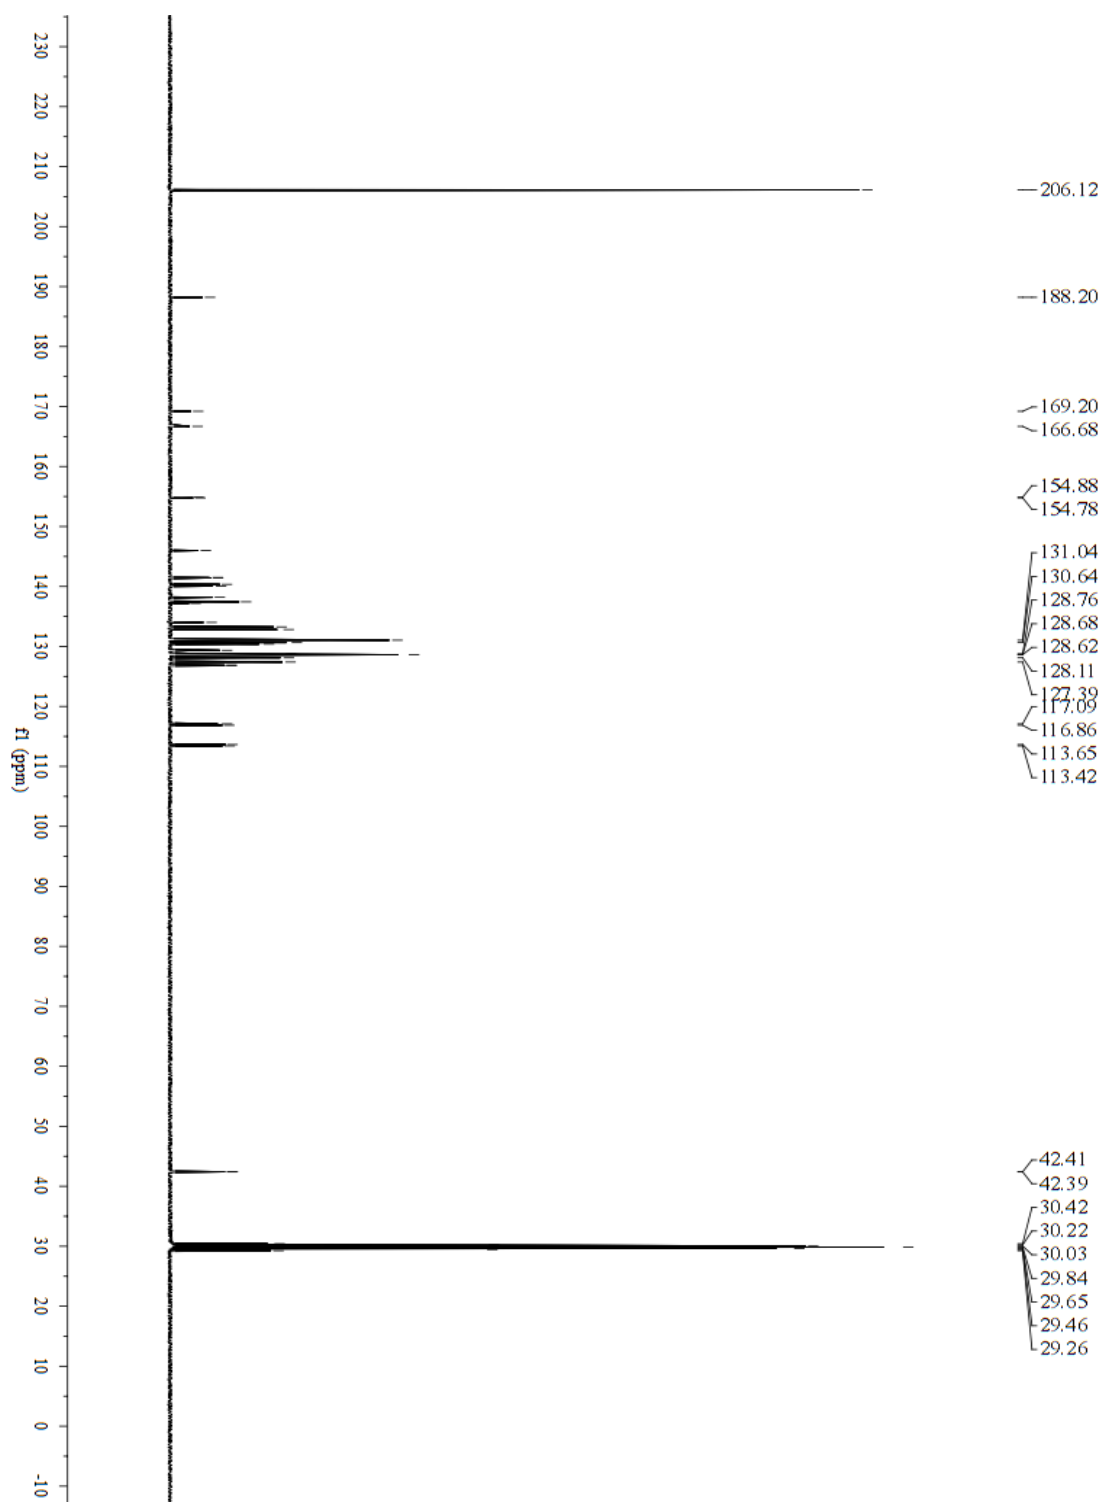

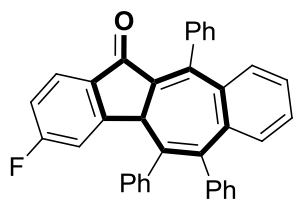

**3am**

<sup>1</sup>H NMR (400 MHz, acetone)

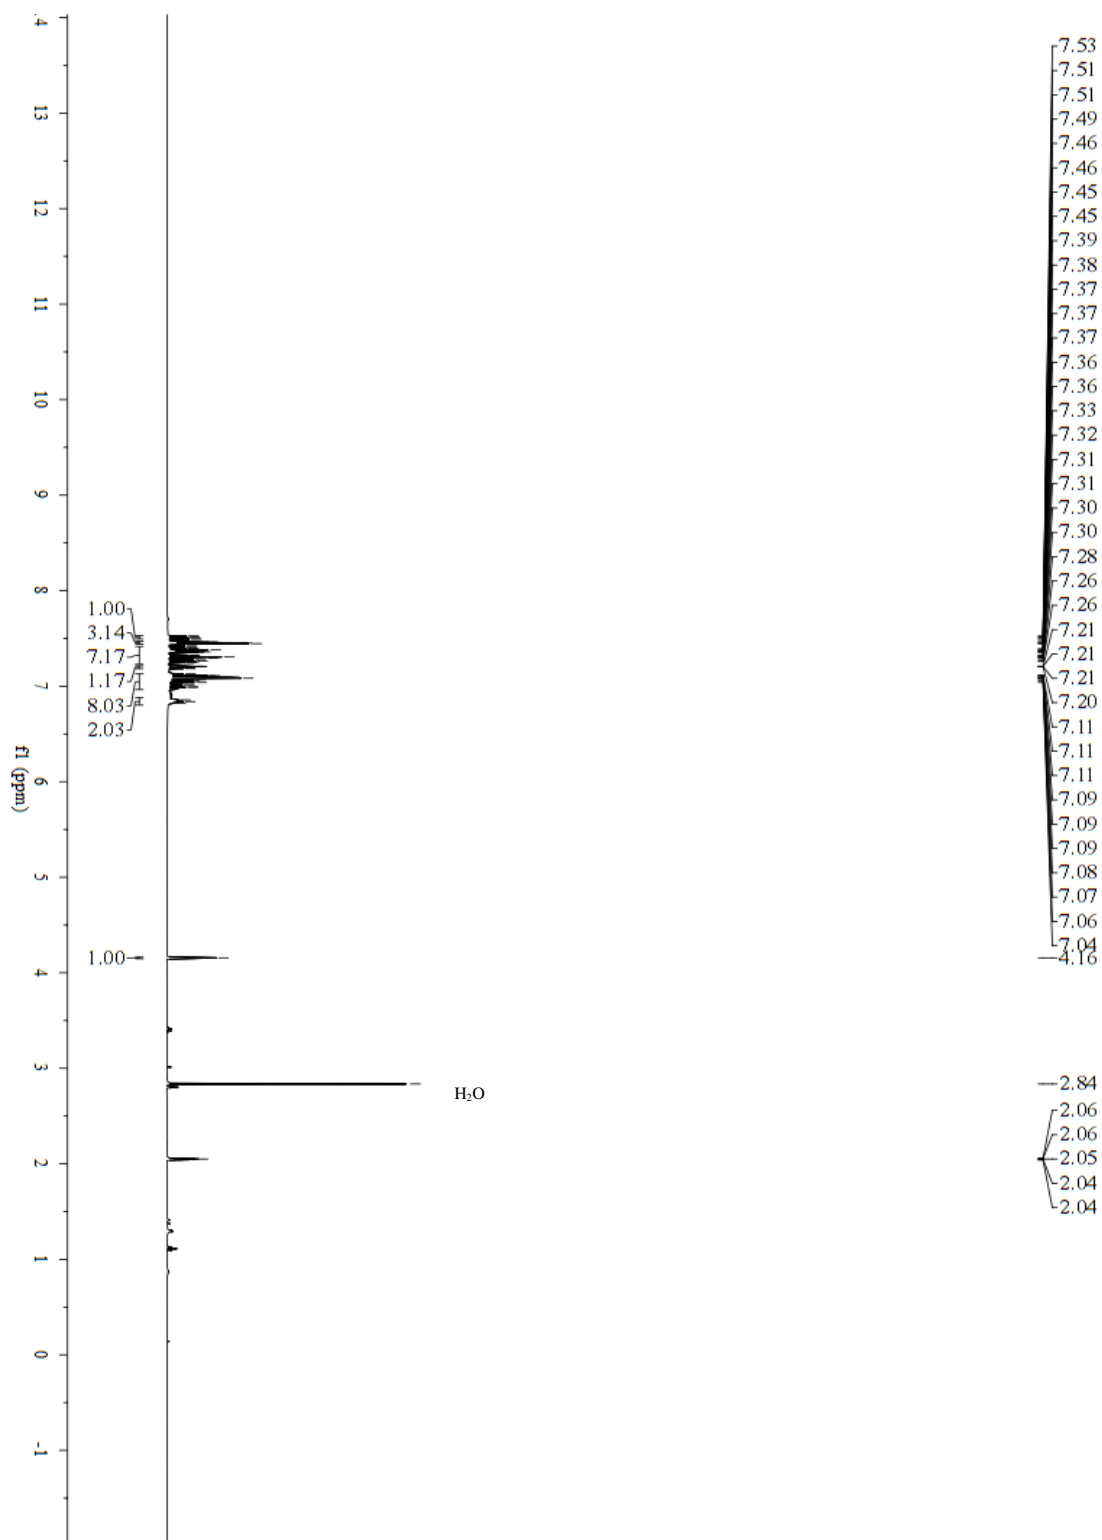

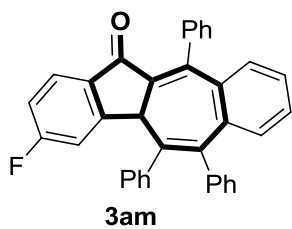

<sup>13</sup>C NMR (100 MHz, acetone)

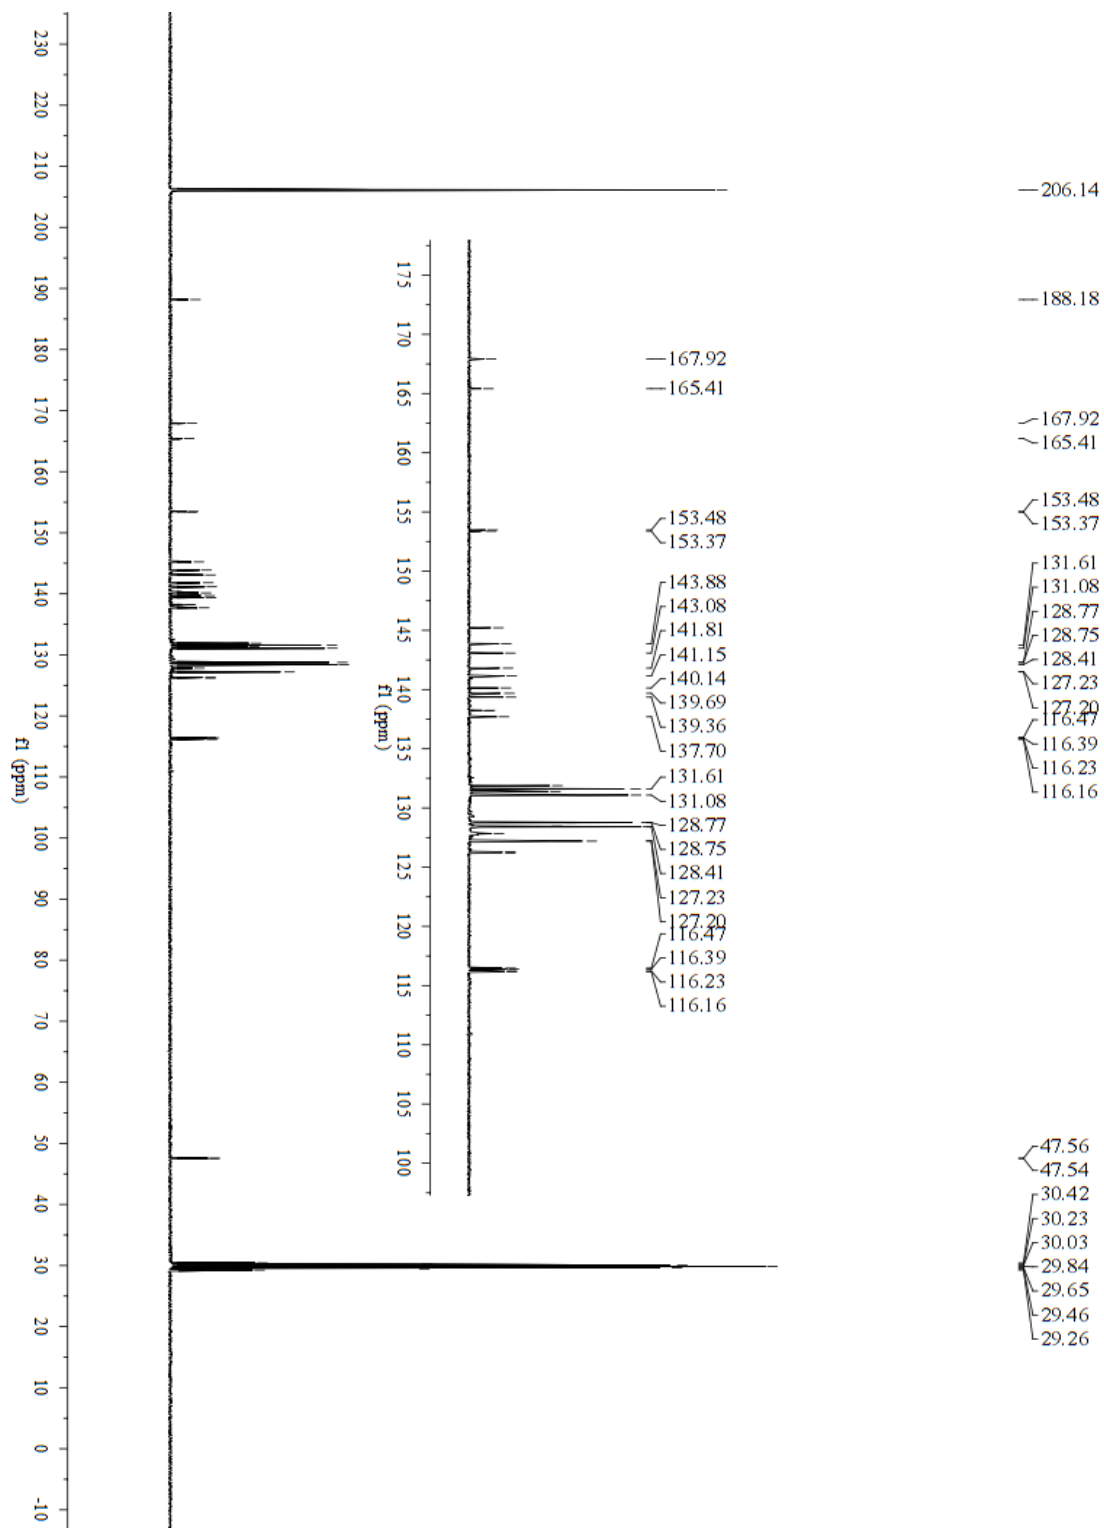



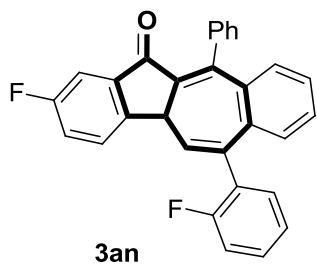

<sup>1</sup>H NMR (400 MHz, acetone)

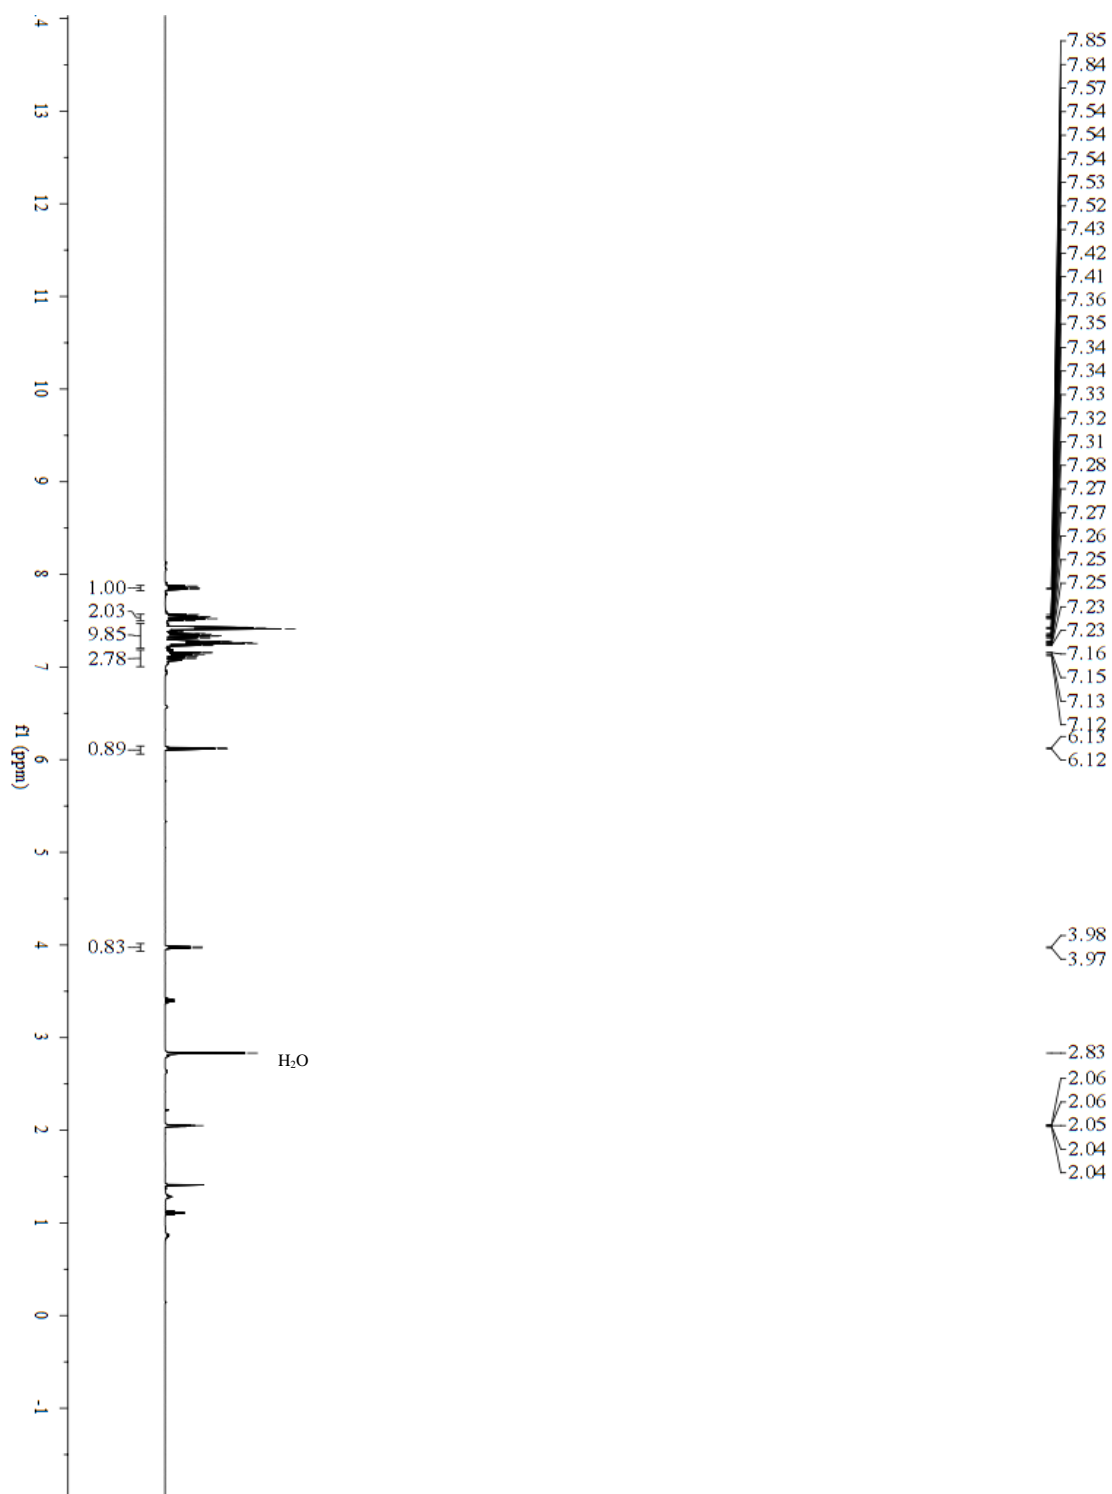

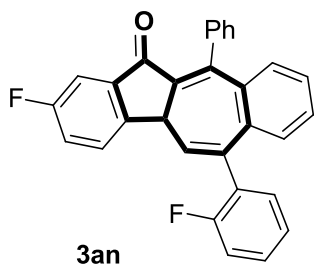

$^{13}\text{C}$  NMR (100 MHz, acetone)

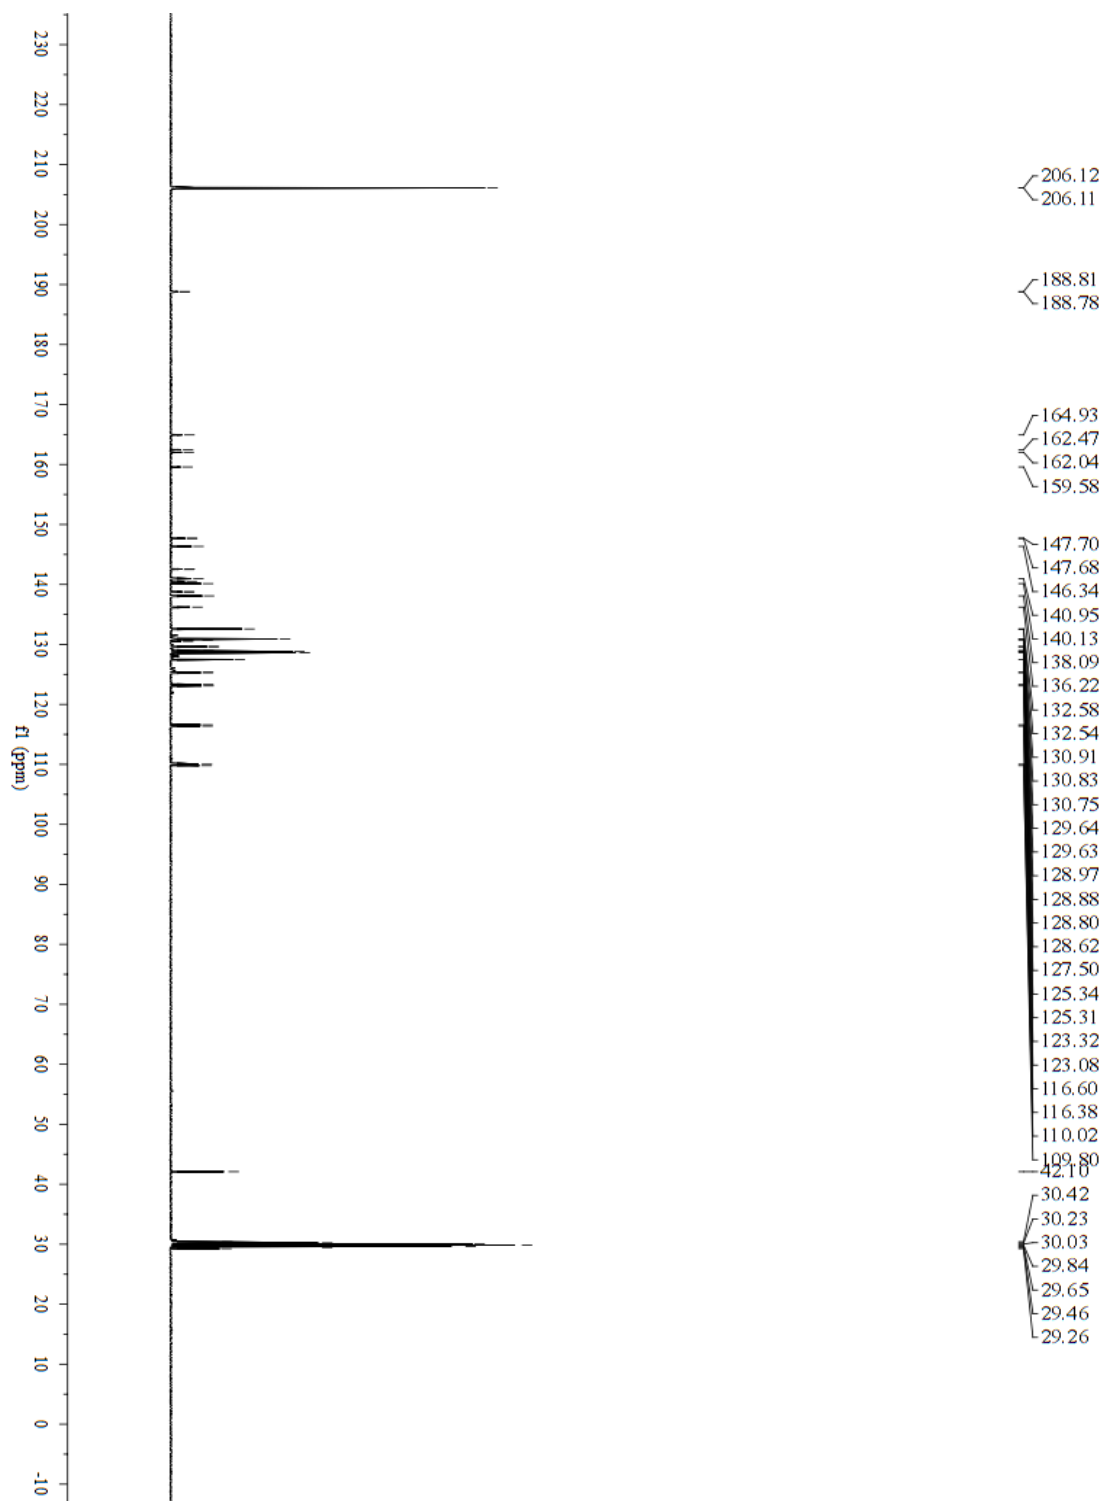

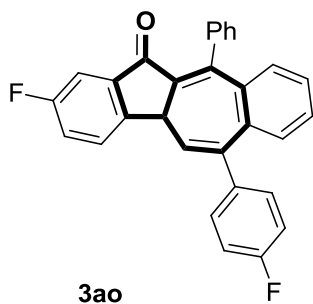

$^1\text{H NMR}$  (400 MHz, acetone)

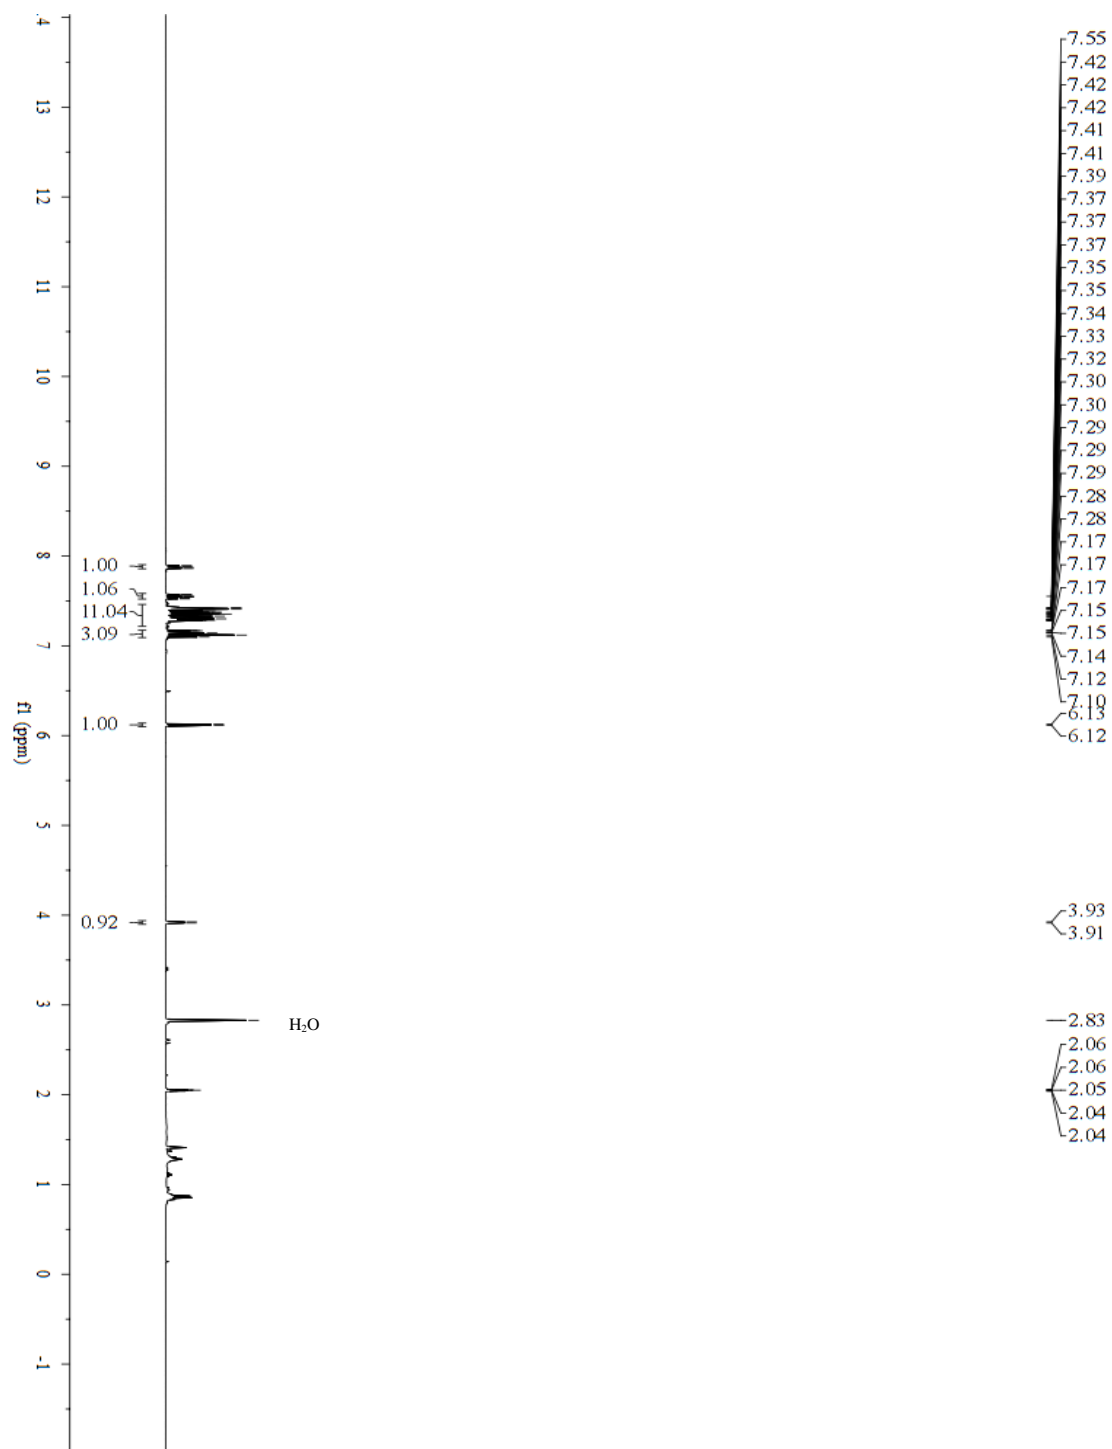

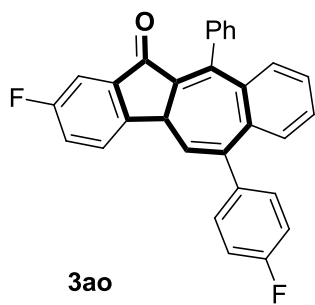

$^{13}\text{C}$  NMR (100 MHz, acetone)

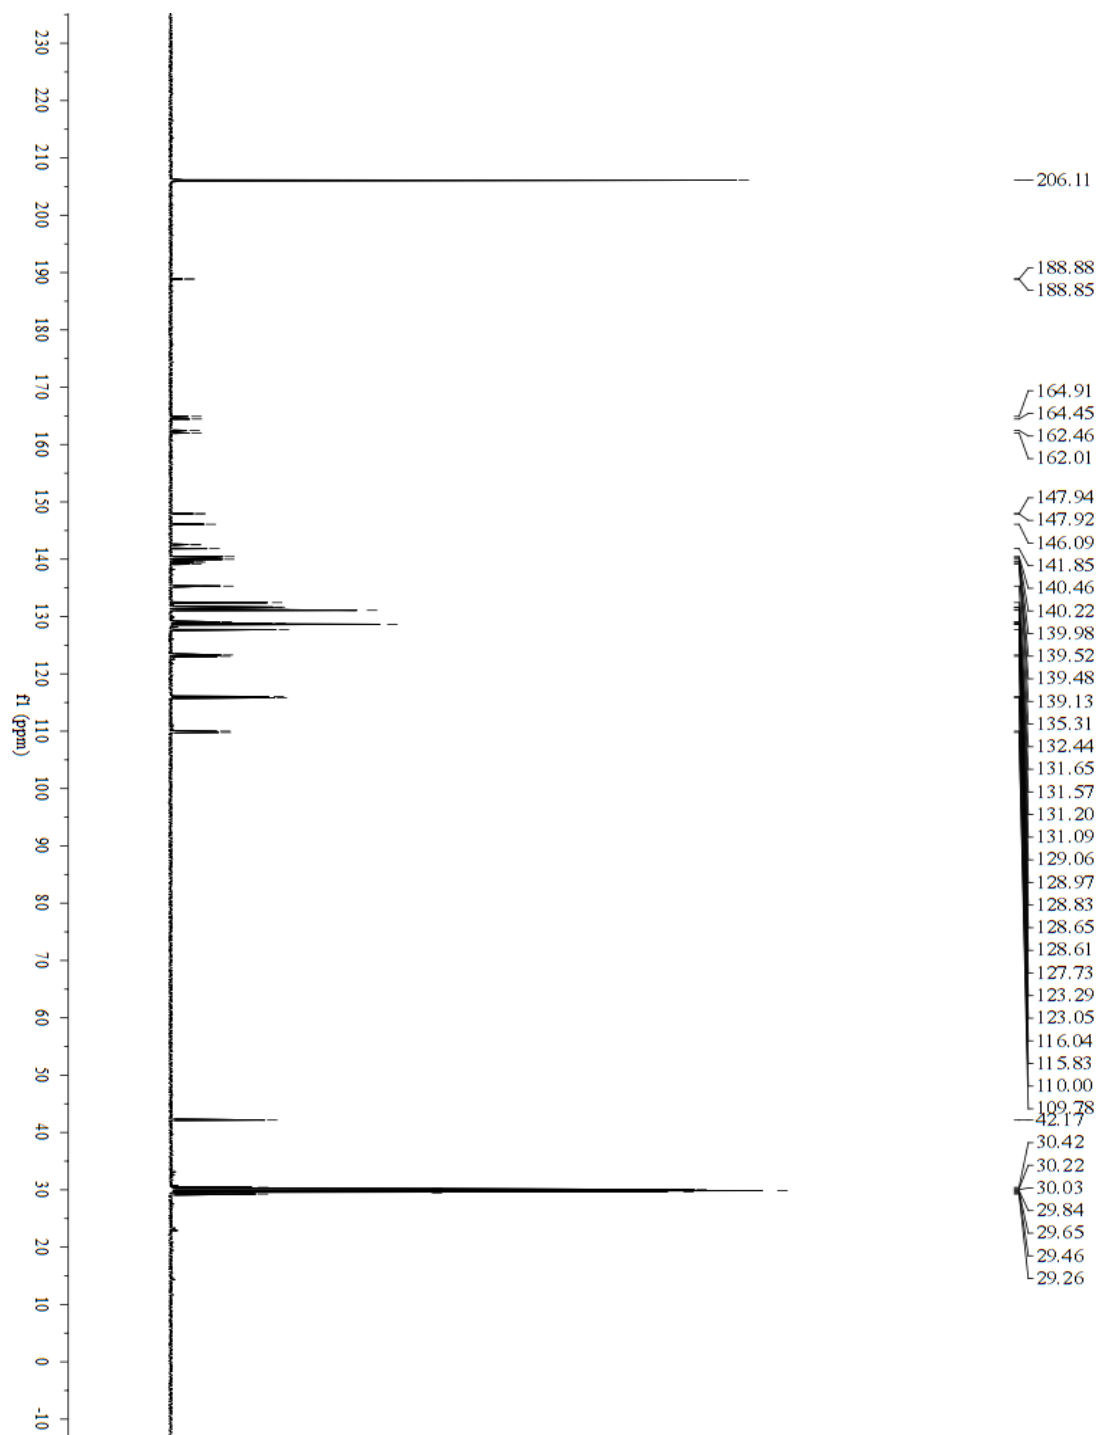



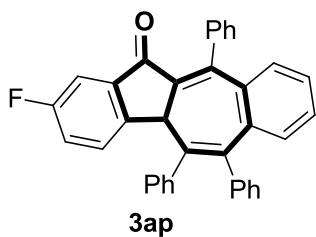

<sup>13</sup>C NMR (100 MHz, acetone)

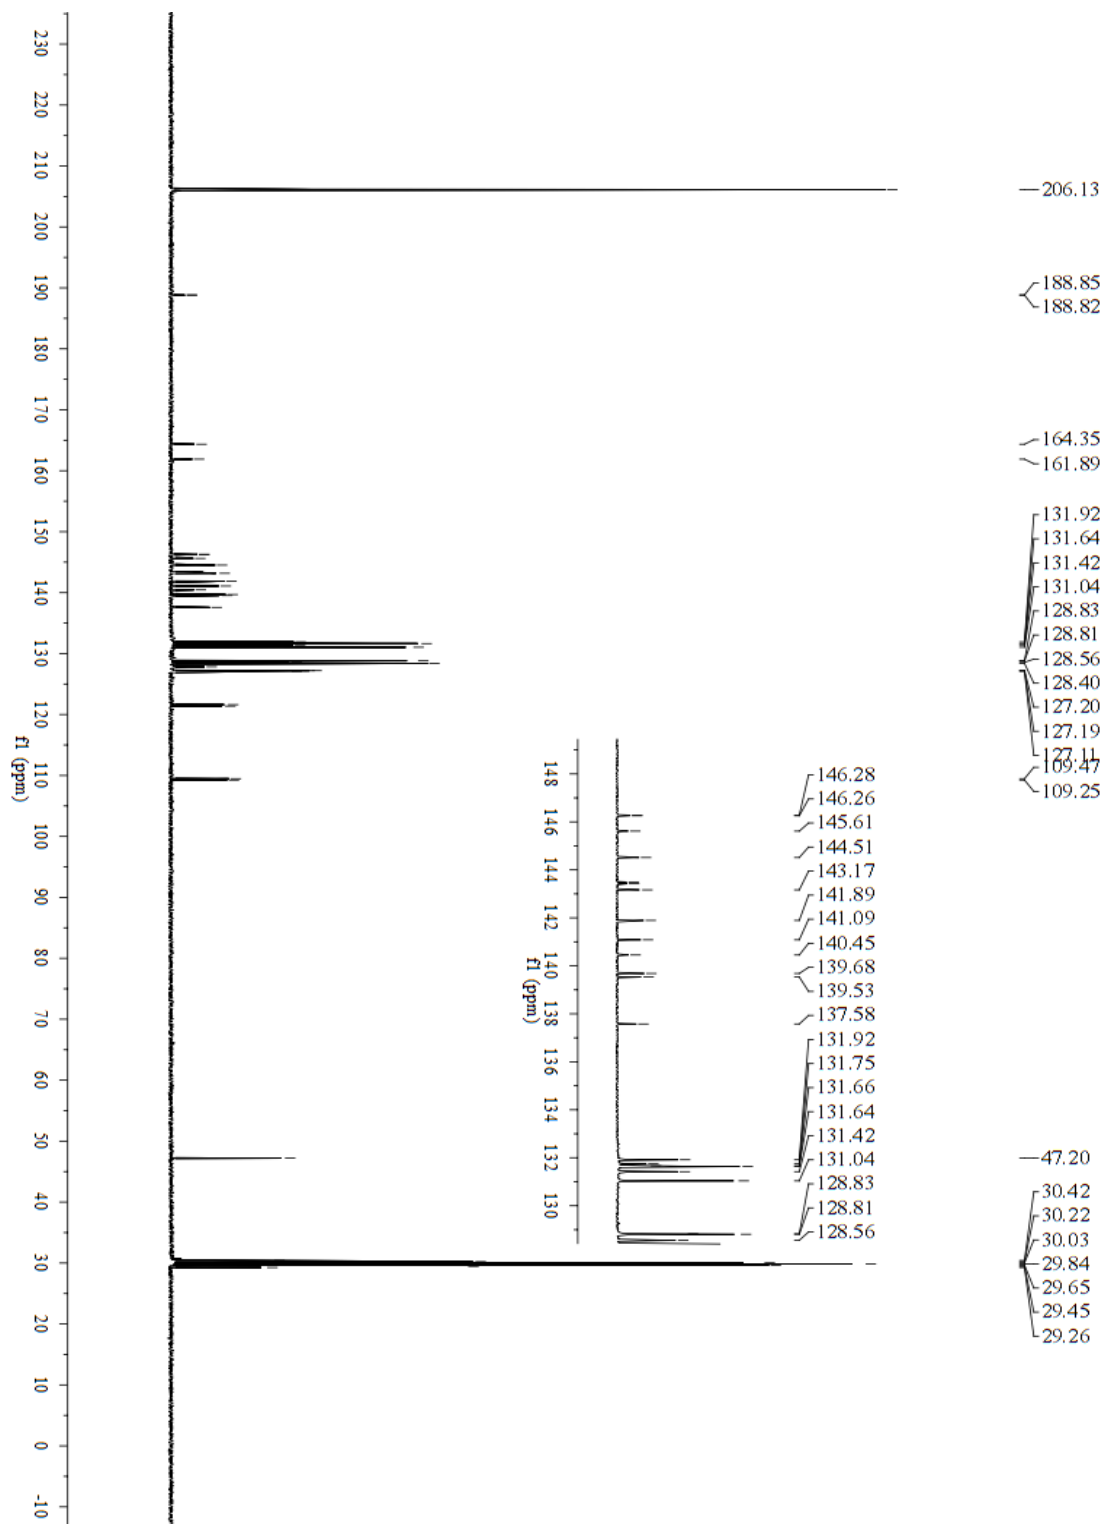

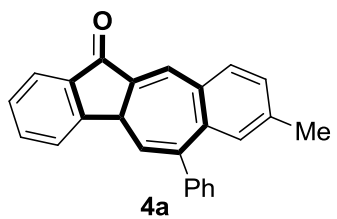

<sup>1</sup>H NMR (400 MHz, CDCl<sub>3</sub>)

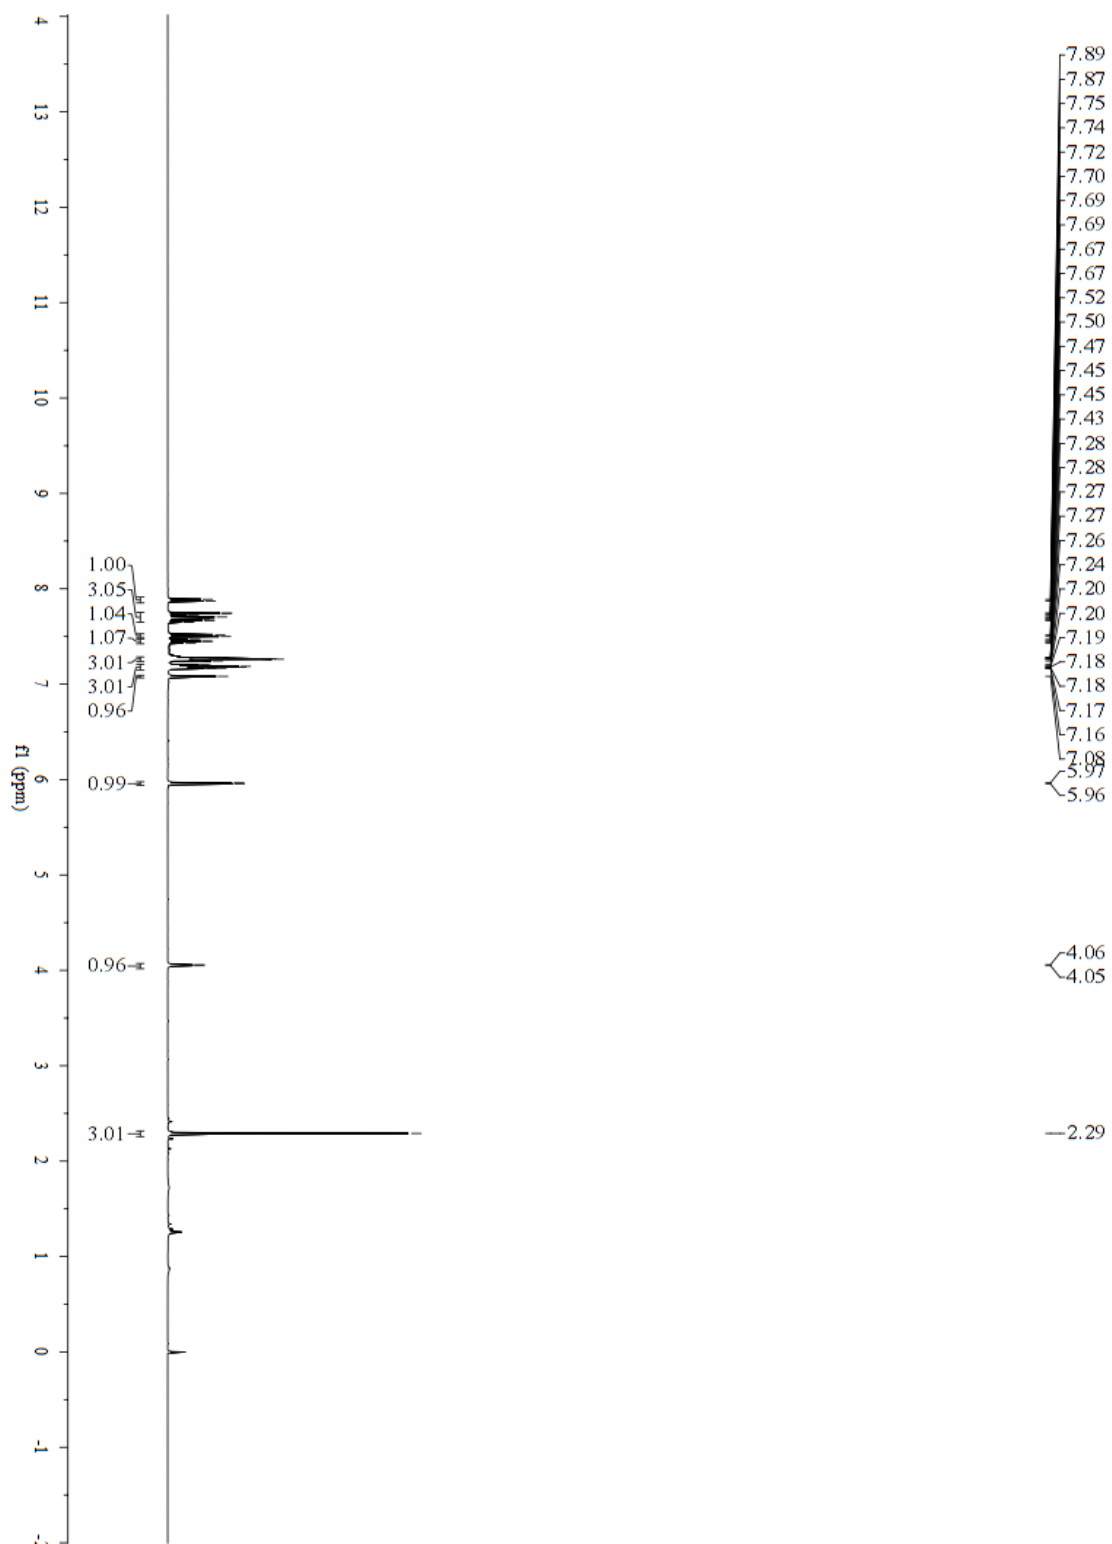

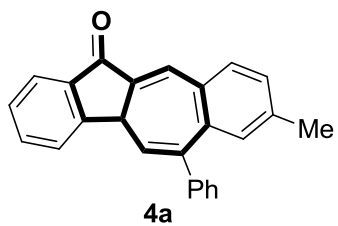

$^{13}\text{C}$  NMR (100 MHz,  $\text{CDCl}_3$ )

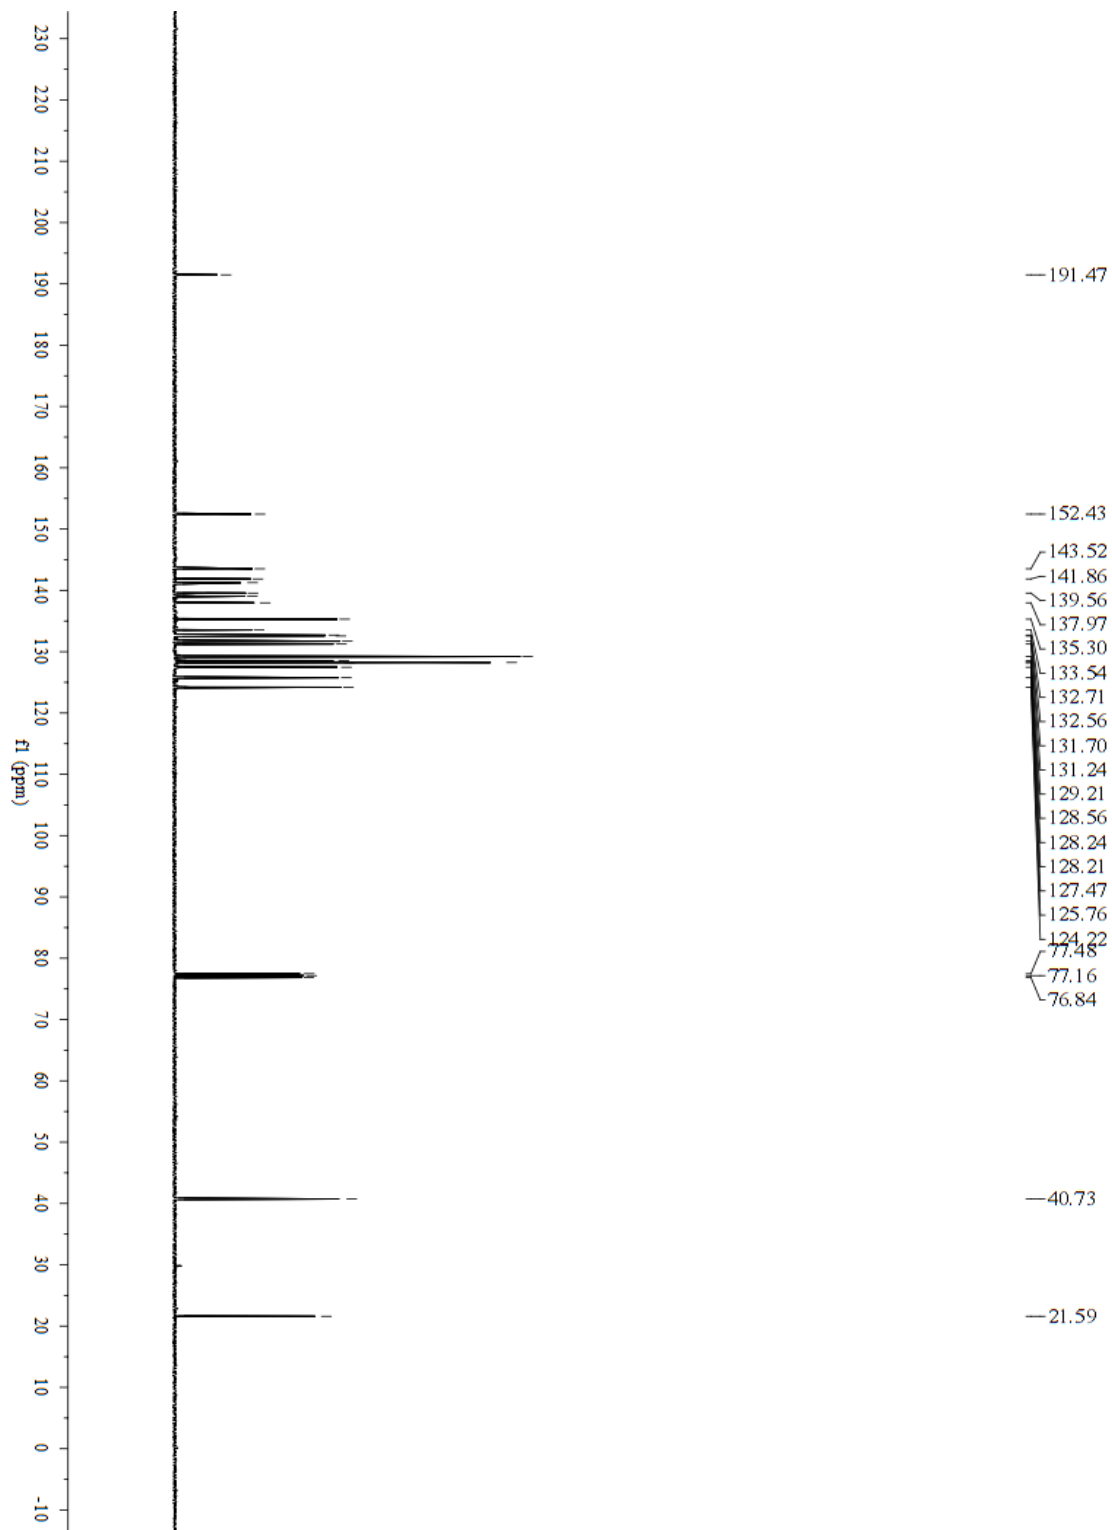



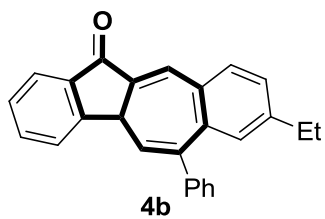

$^1\text{H NMR}$  (400 MHz,  $\text{CDCl}_3$ )

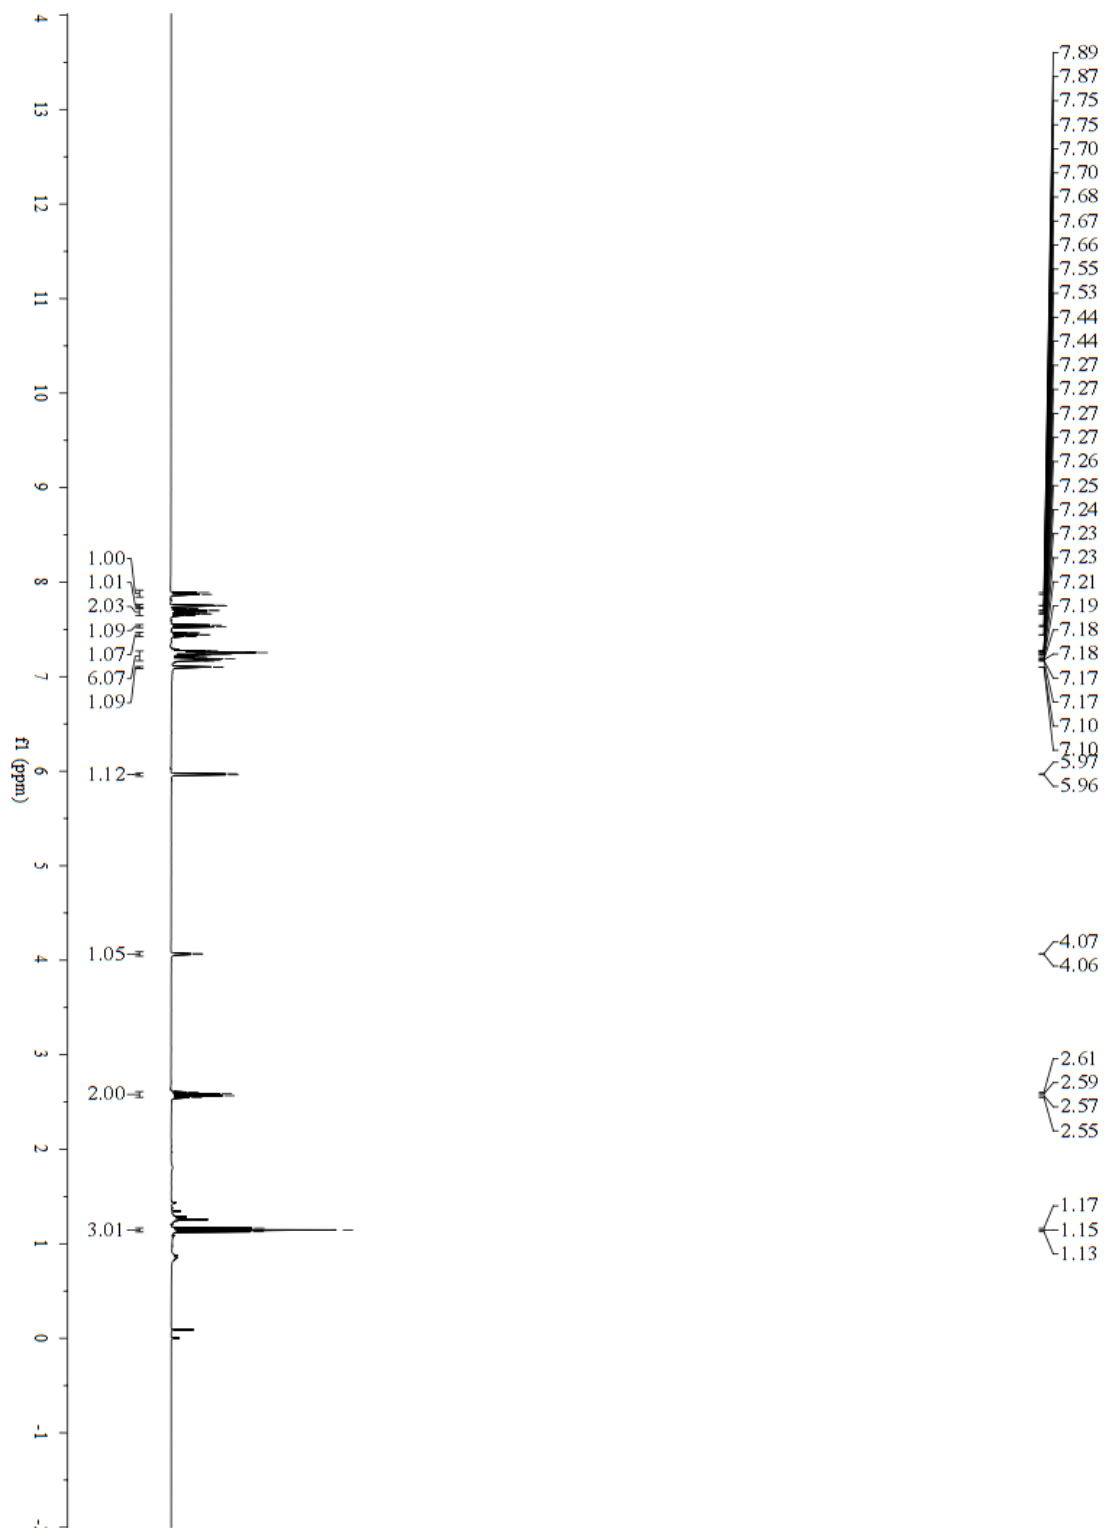

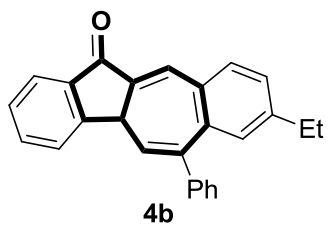

<sup>13</sup>C NMR (100 MHz, CDCl<sub>3</sub>)

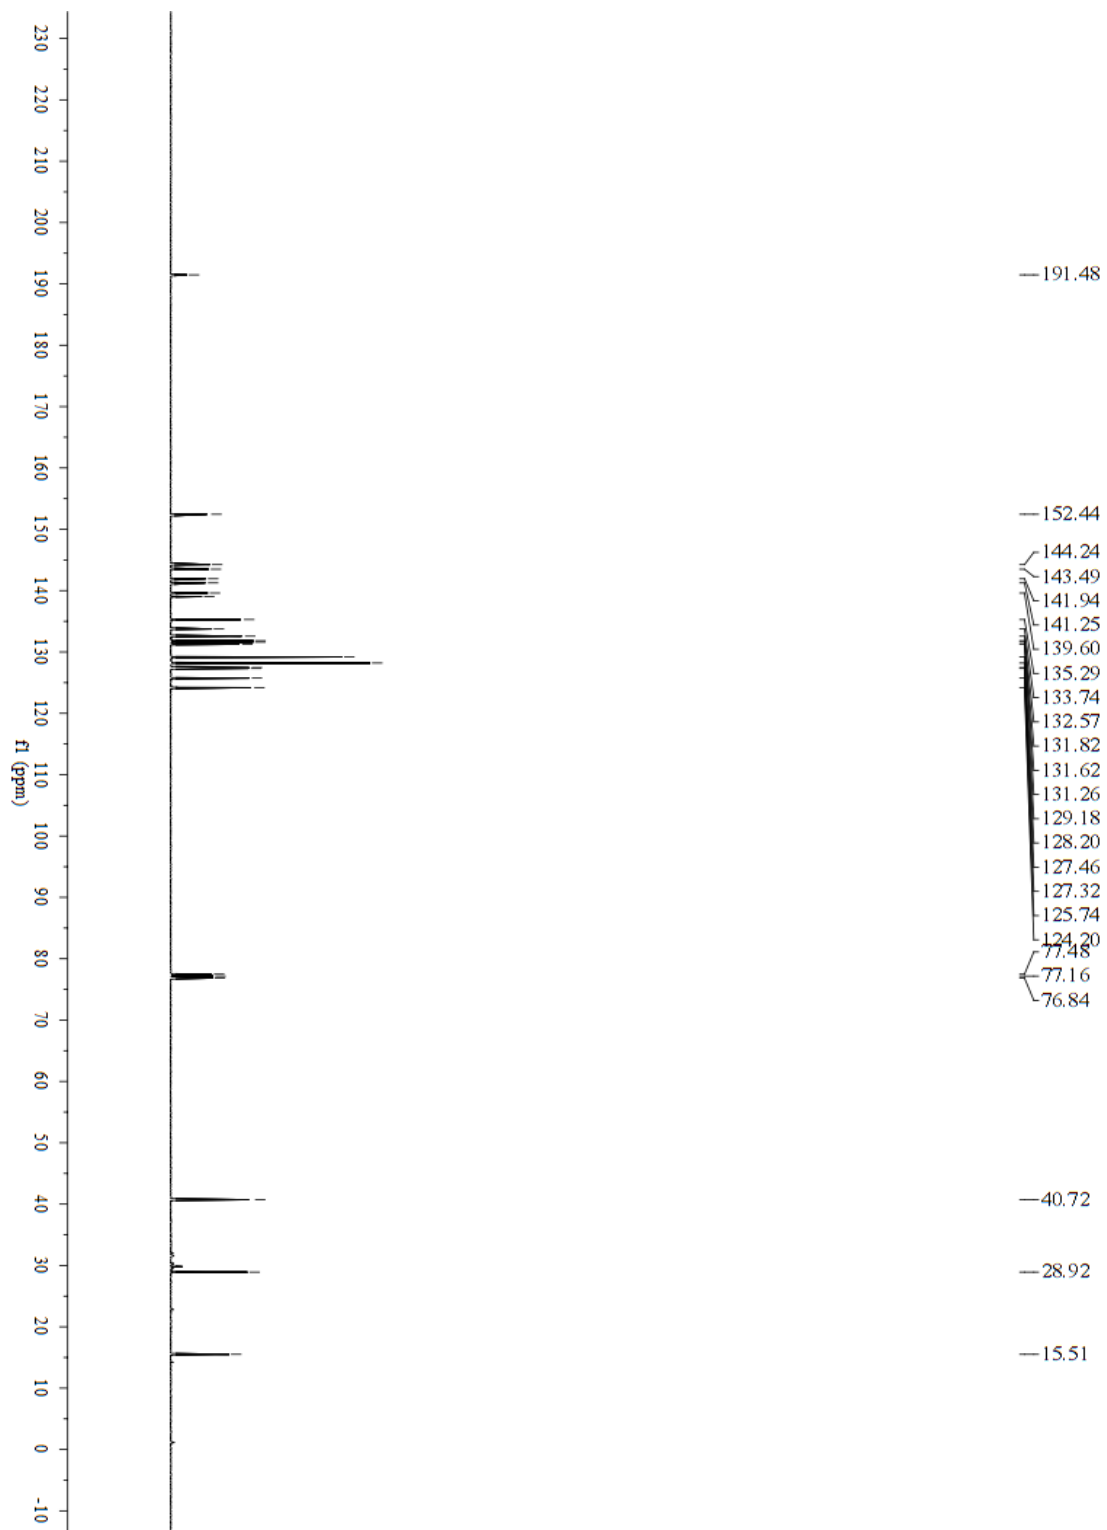

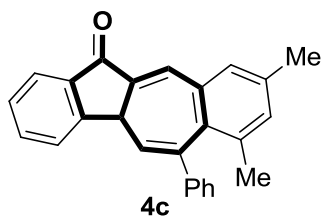

$^1\text{H NMR}$  (400 MHz,  $\text{CDCl}_3$ )

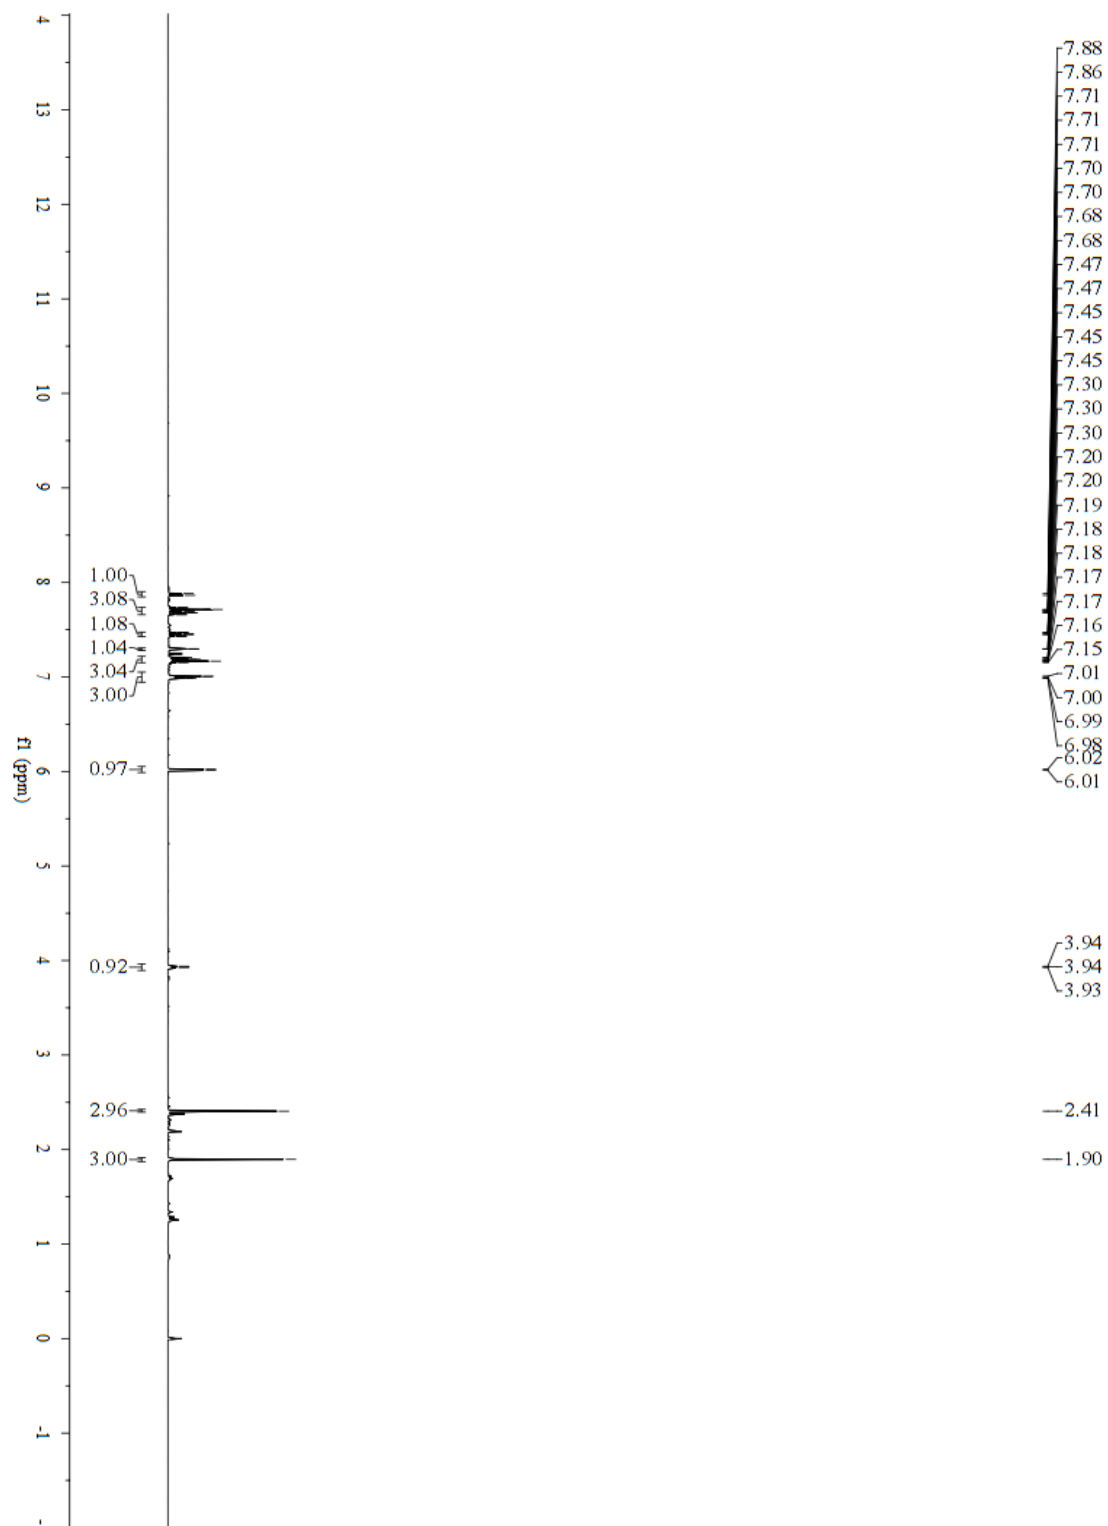

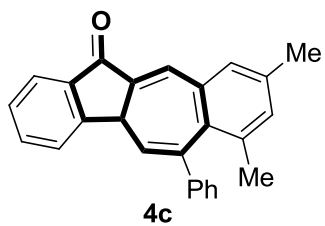

$^{13}\text{C}$  NMR (100 MHz,  $\text{CDCl}_3$ )

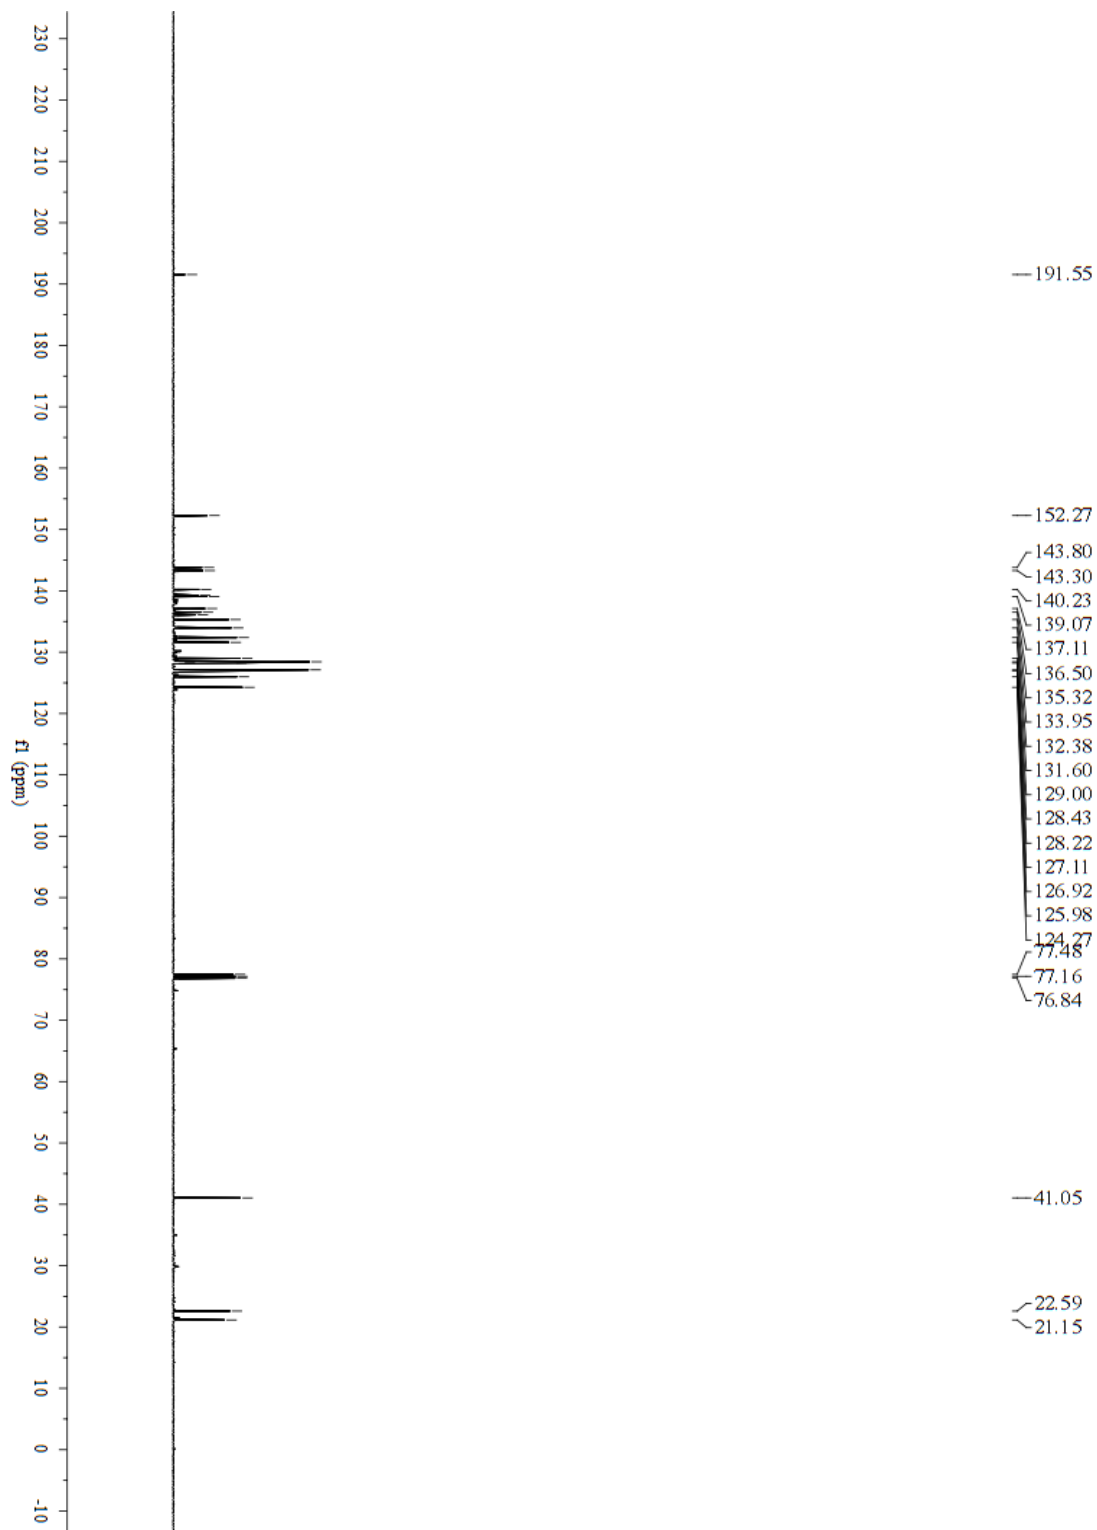

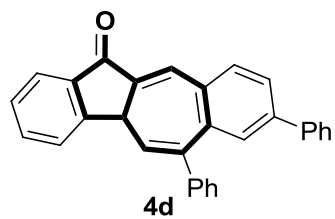

$^1\text{H NMR}$  (400 MHz,  $\text{CDCl}_3$ )

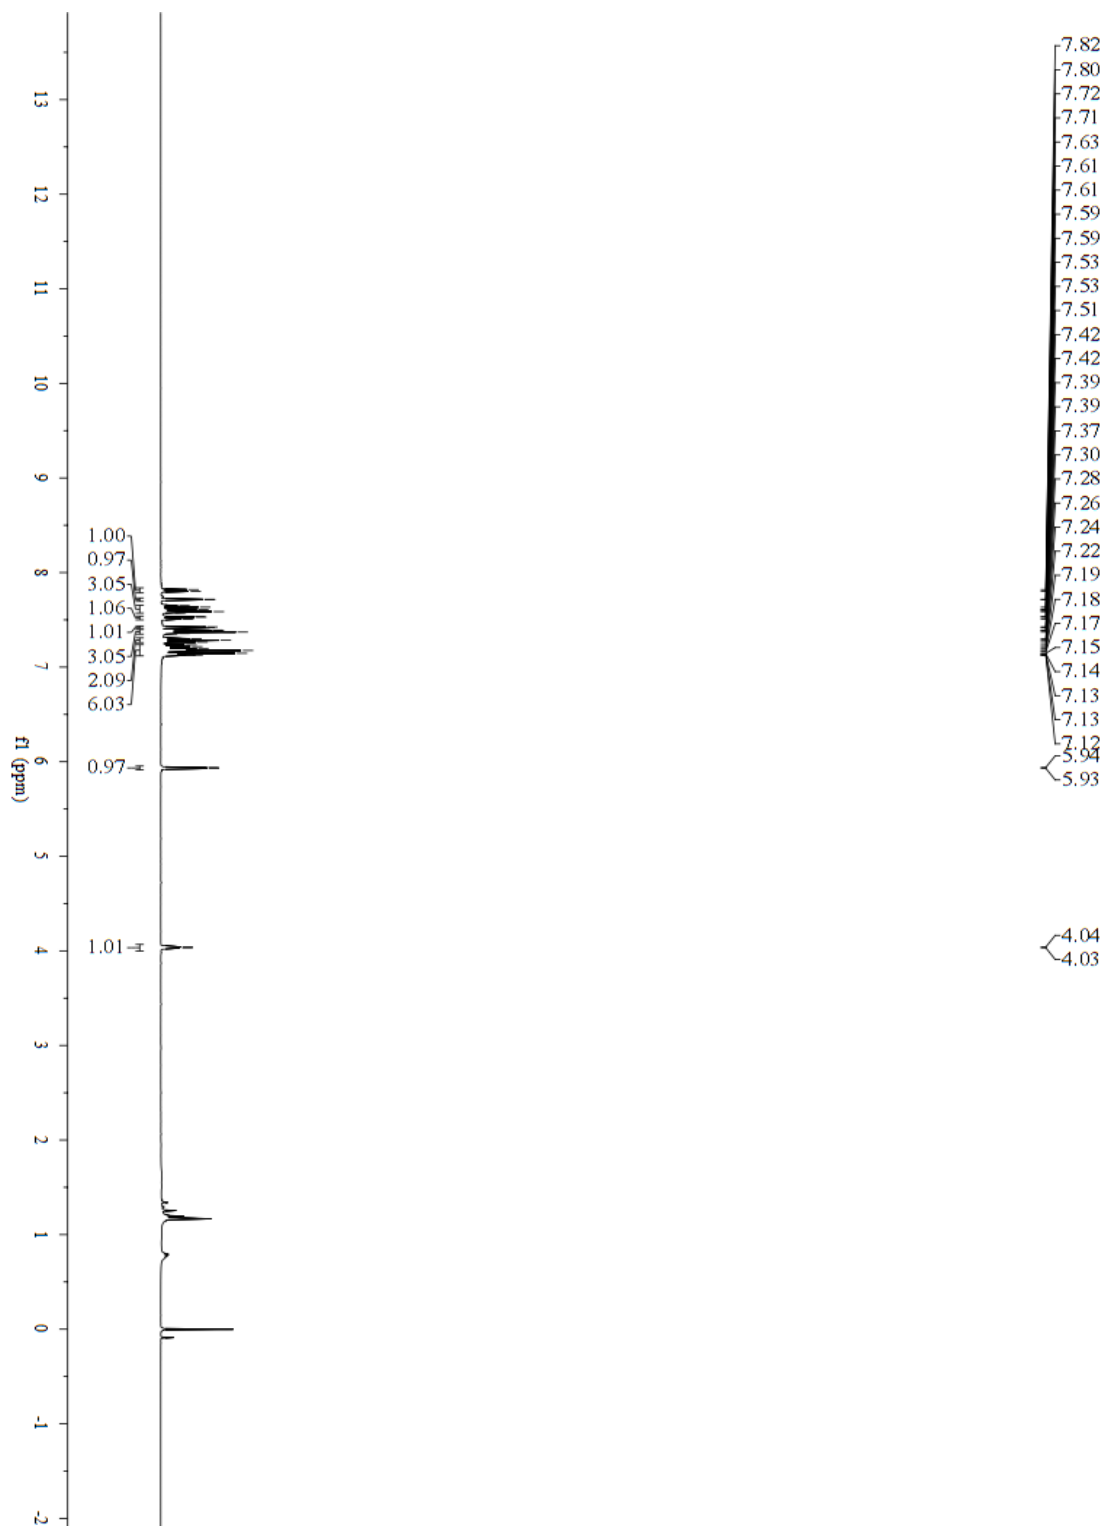

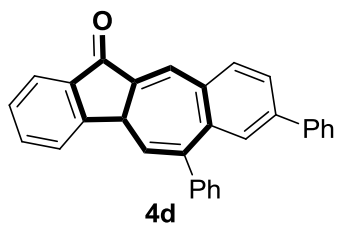

<sup>13</sup>C NMR (100 MHz, CDCl<sub>3</sub>)

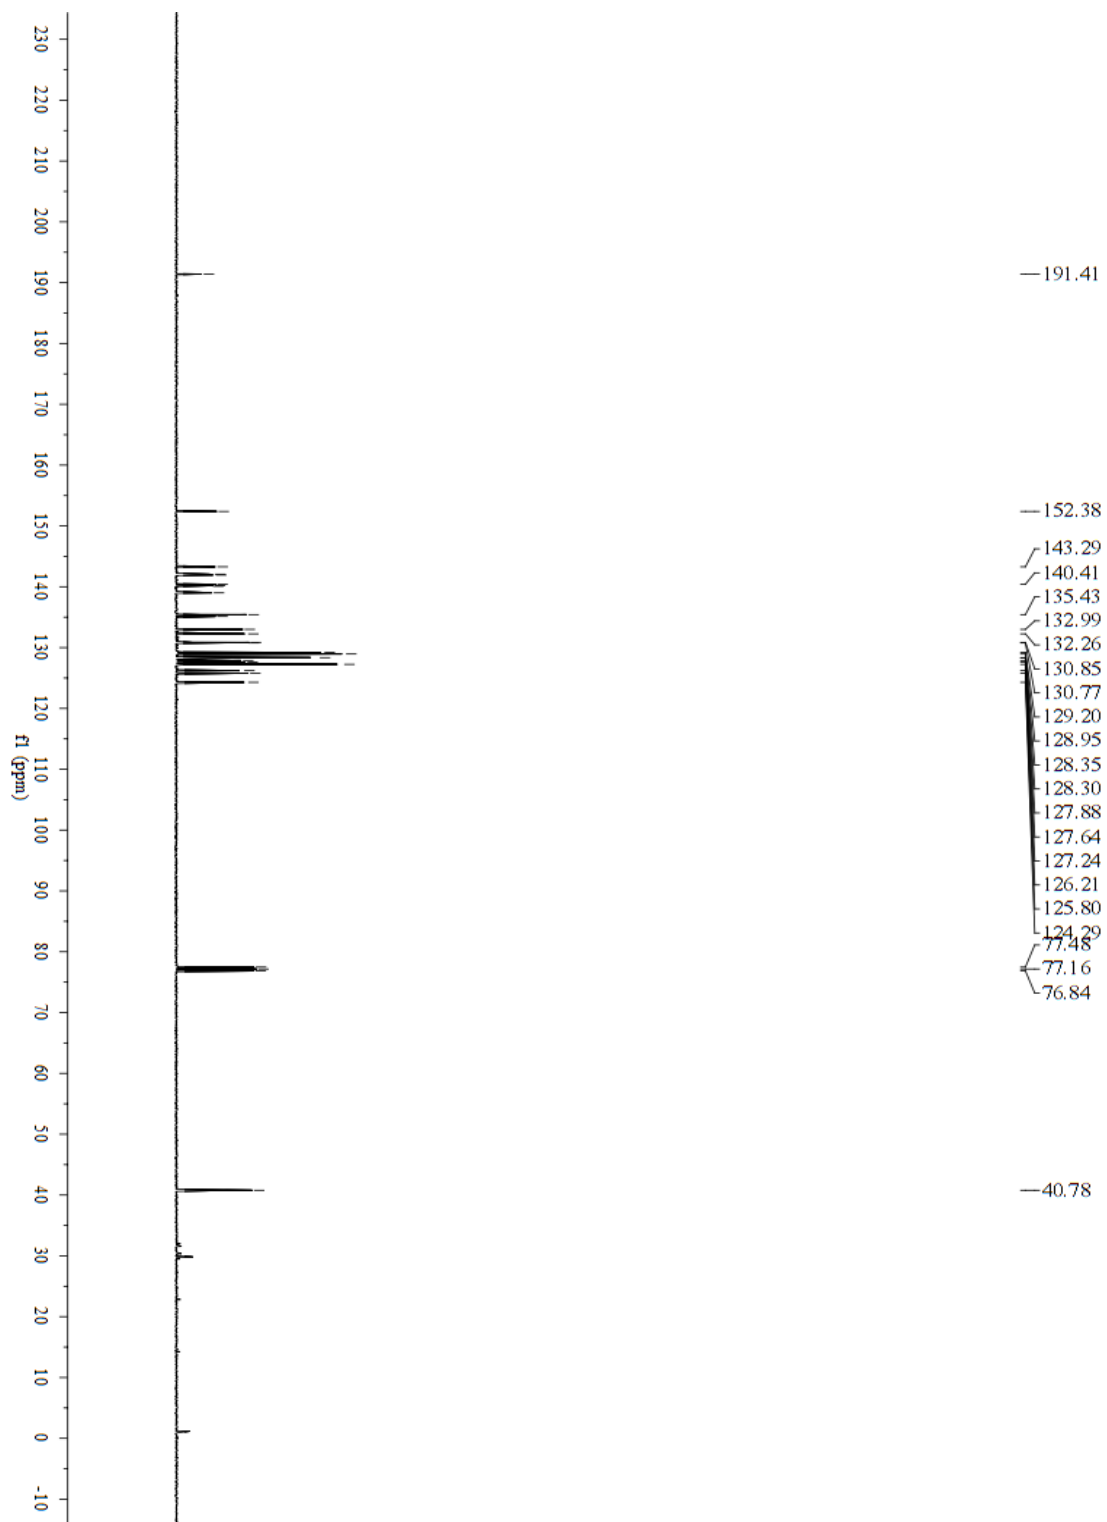

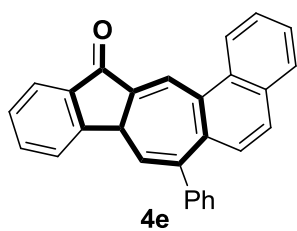

<sup>1</sup>H NMR (400 MHz, CDCl<sub>3</sub>)

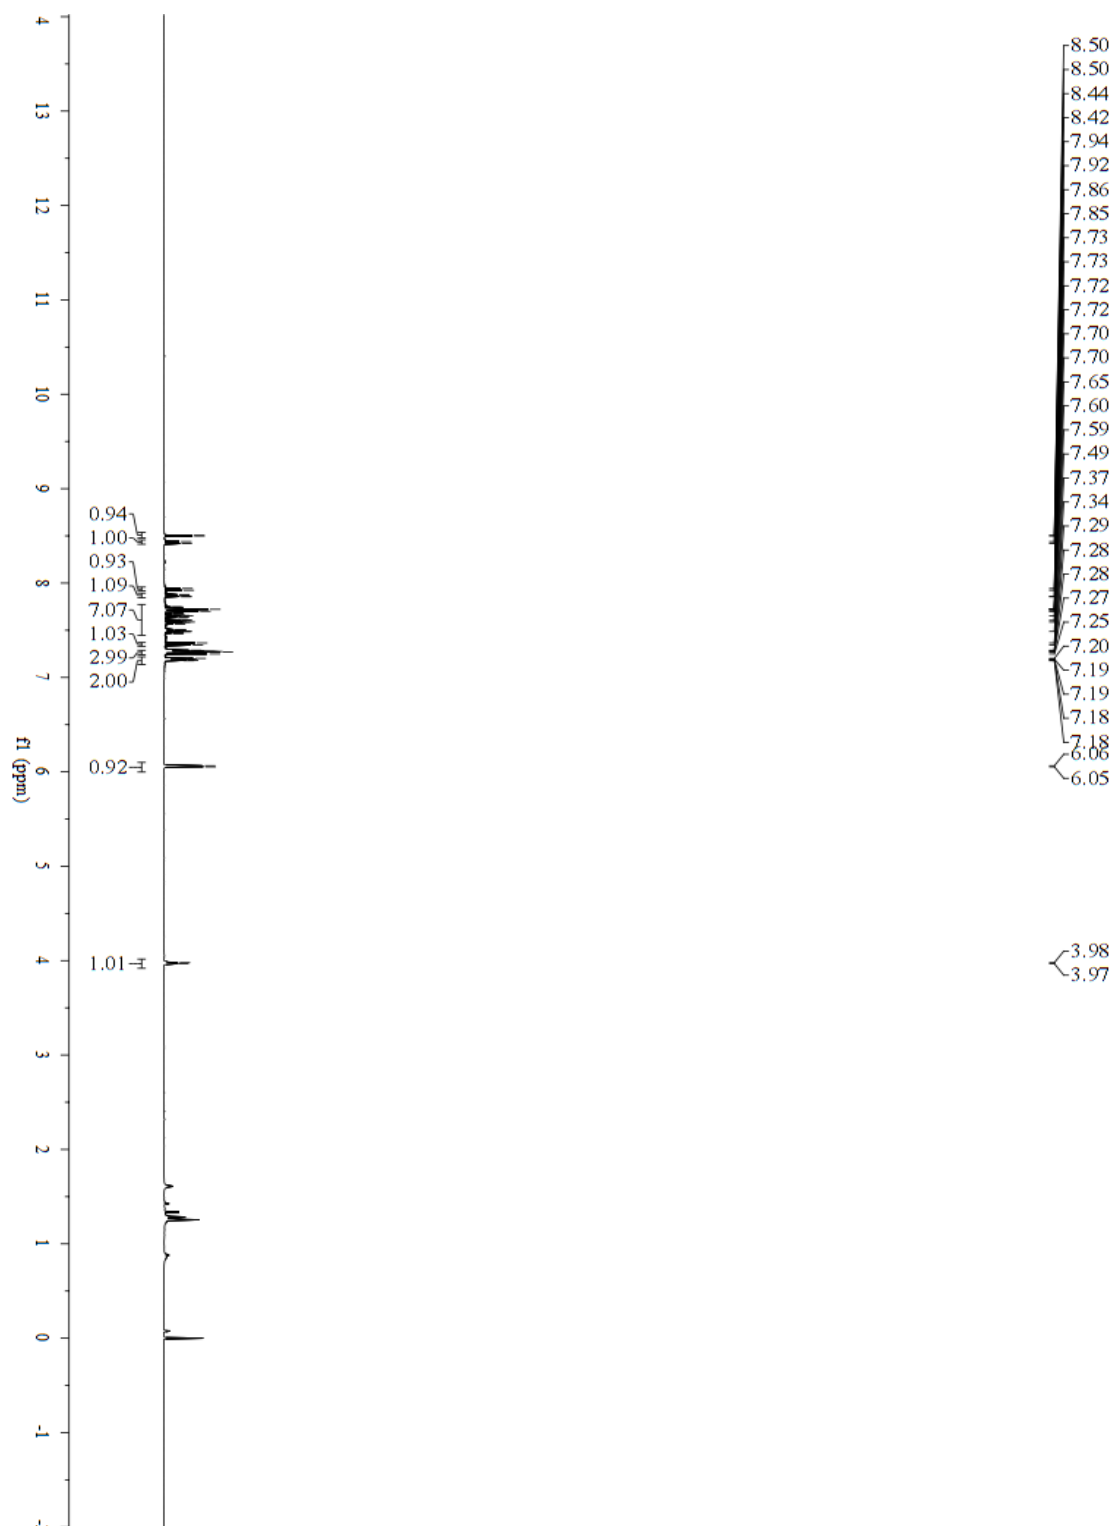

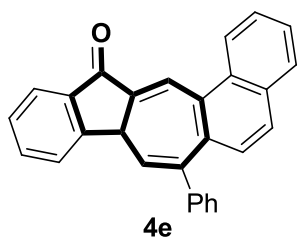

$^{13}\text{C}$  NMR (100 MHz,  $\text{CDCl}_3$ )

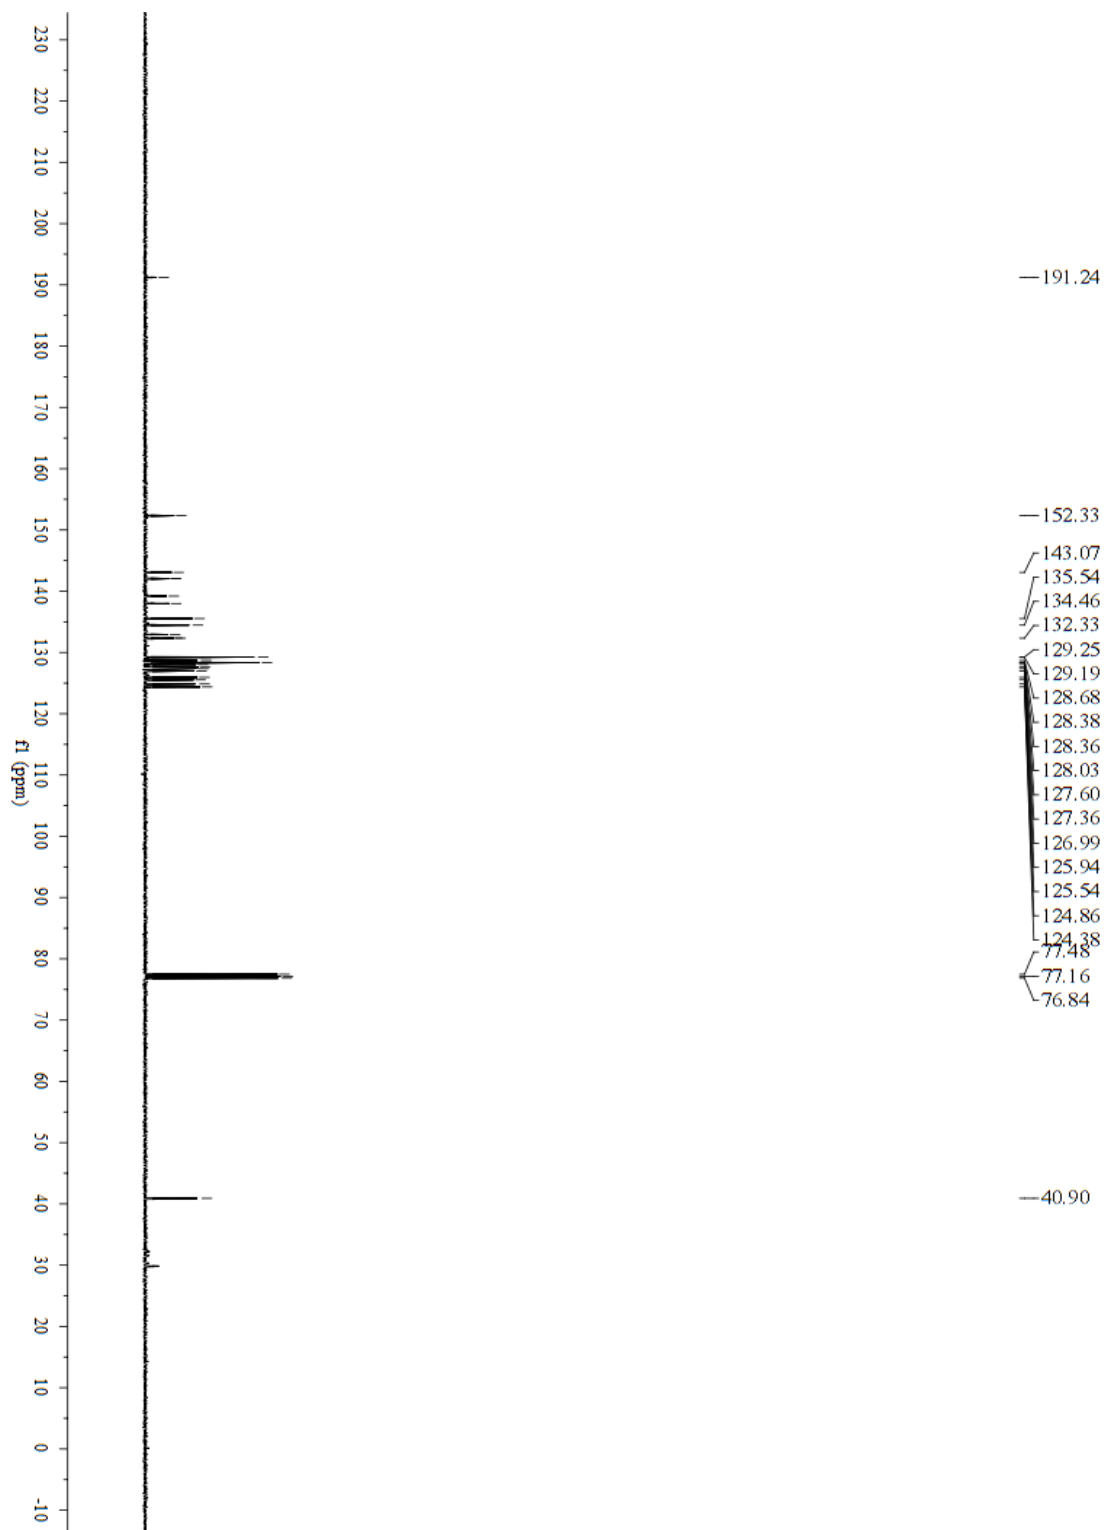



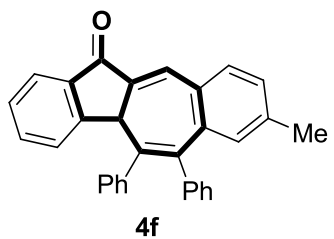

<sup>1</sup>H NMR (400 MHz, CDCl<sub>3</sub>)

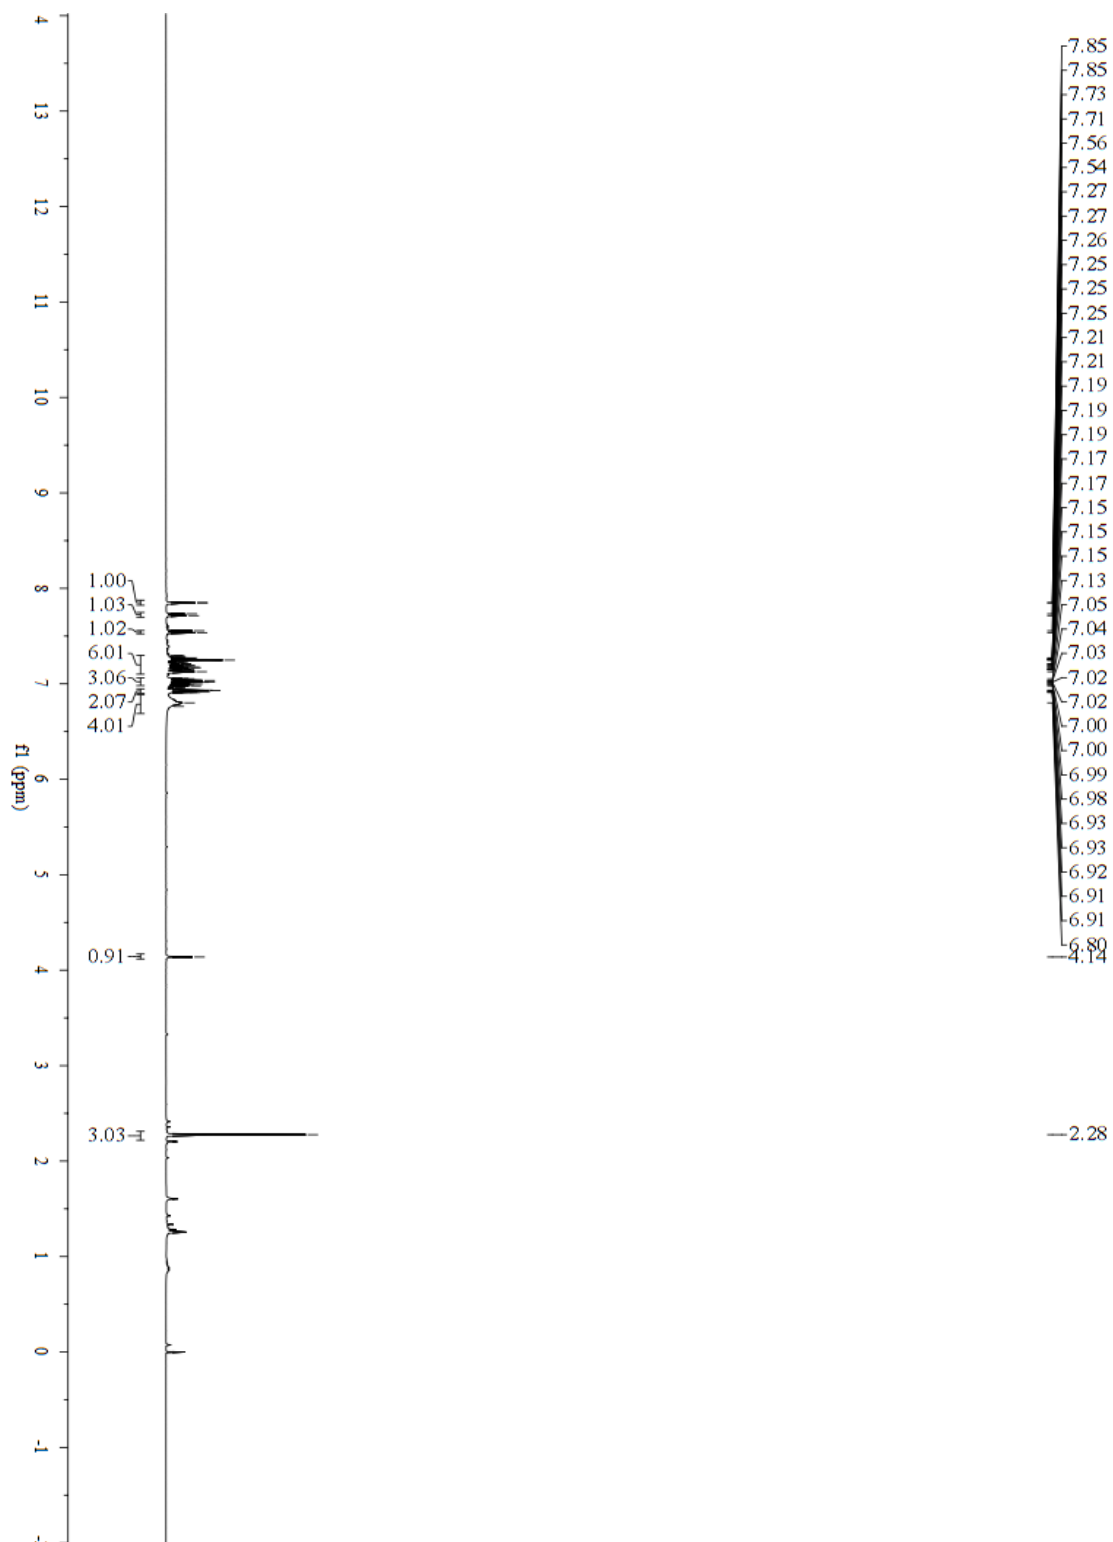

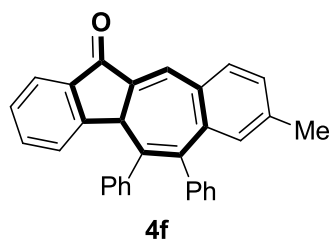

<sup>13</sup>C NMR (100 MHz, CDCl<sub>3</sub>)

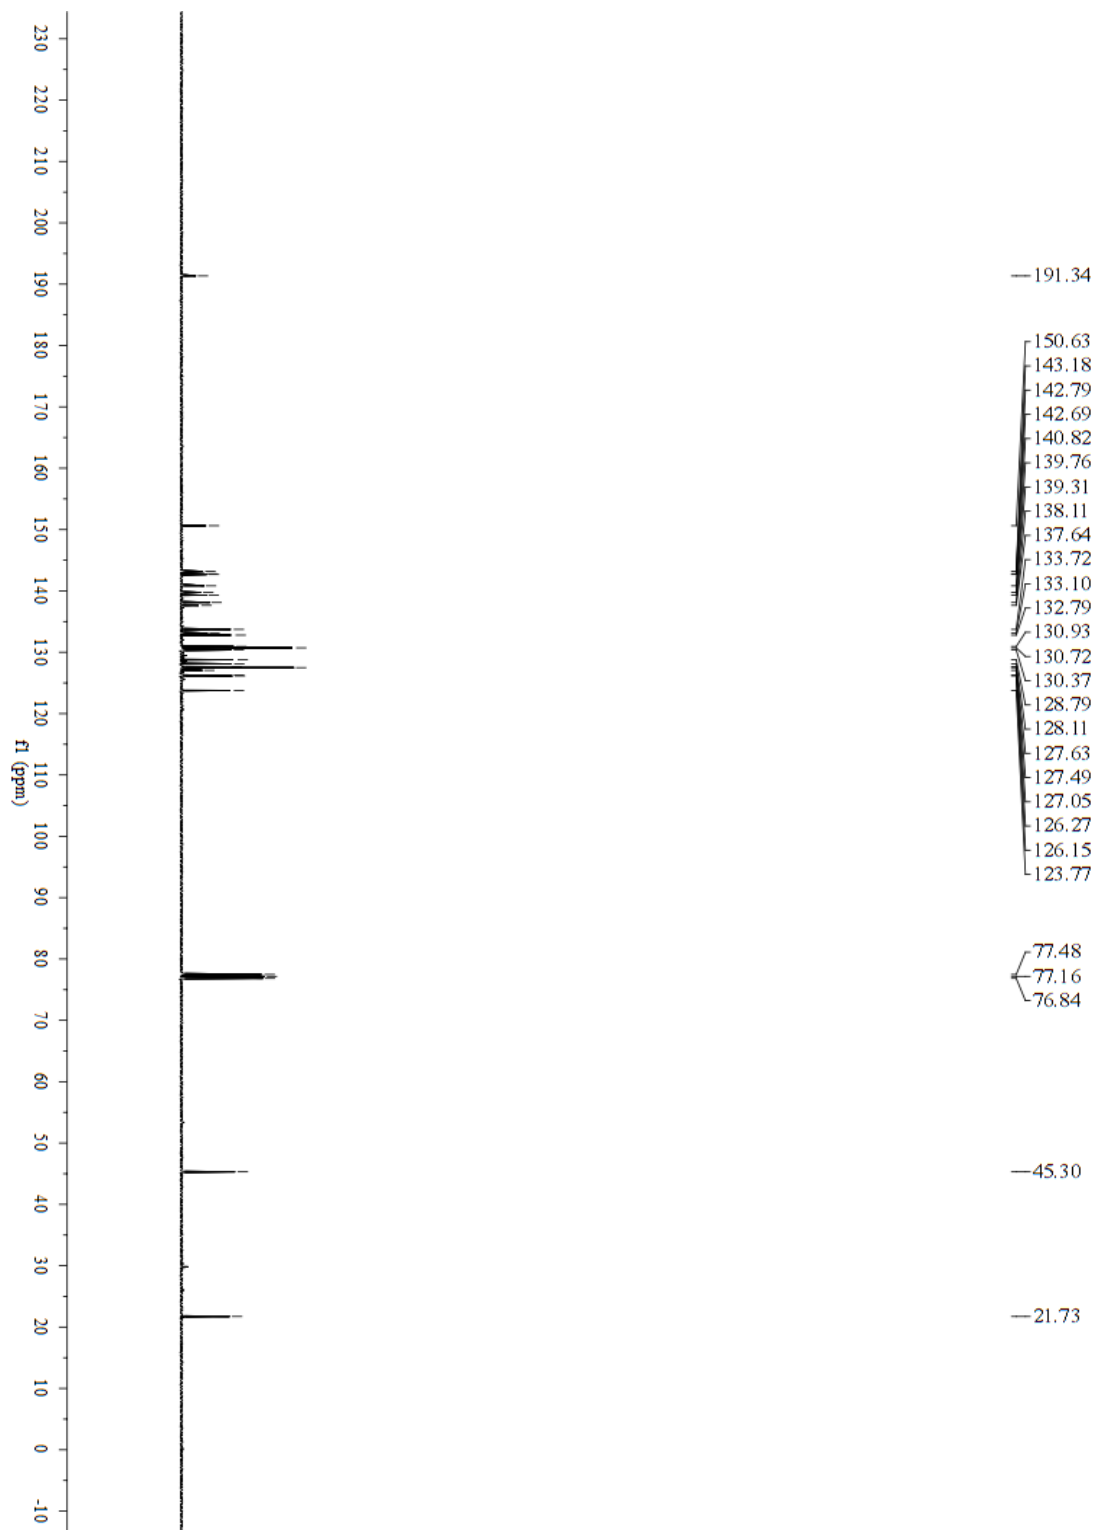

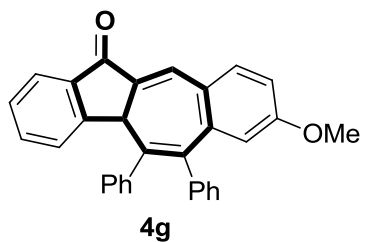

$^1\text{H NMR}$  (400 MHz,  $\text{CDCl}_3$ )

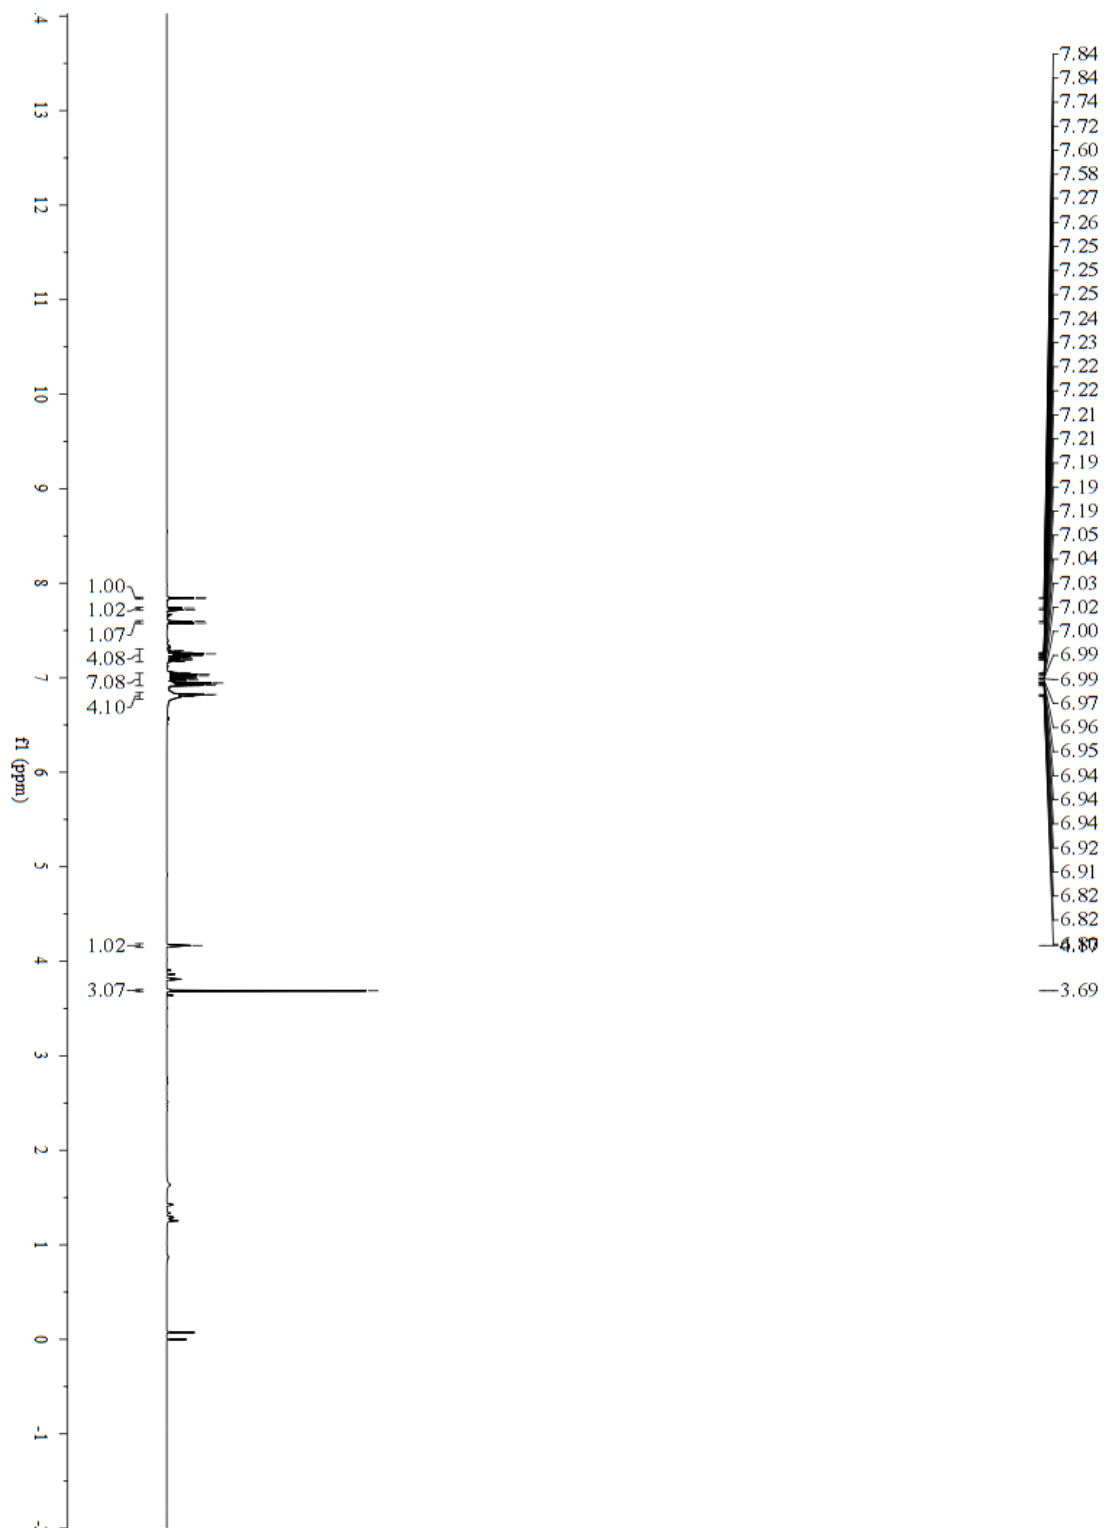

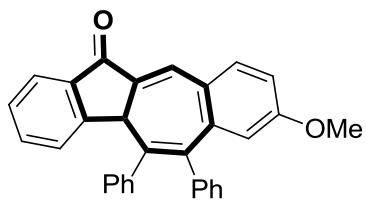

4g

$^{13}\text{C}$  NMR (100 MHz,  $\text{CDCl}_3$ )

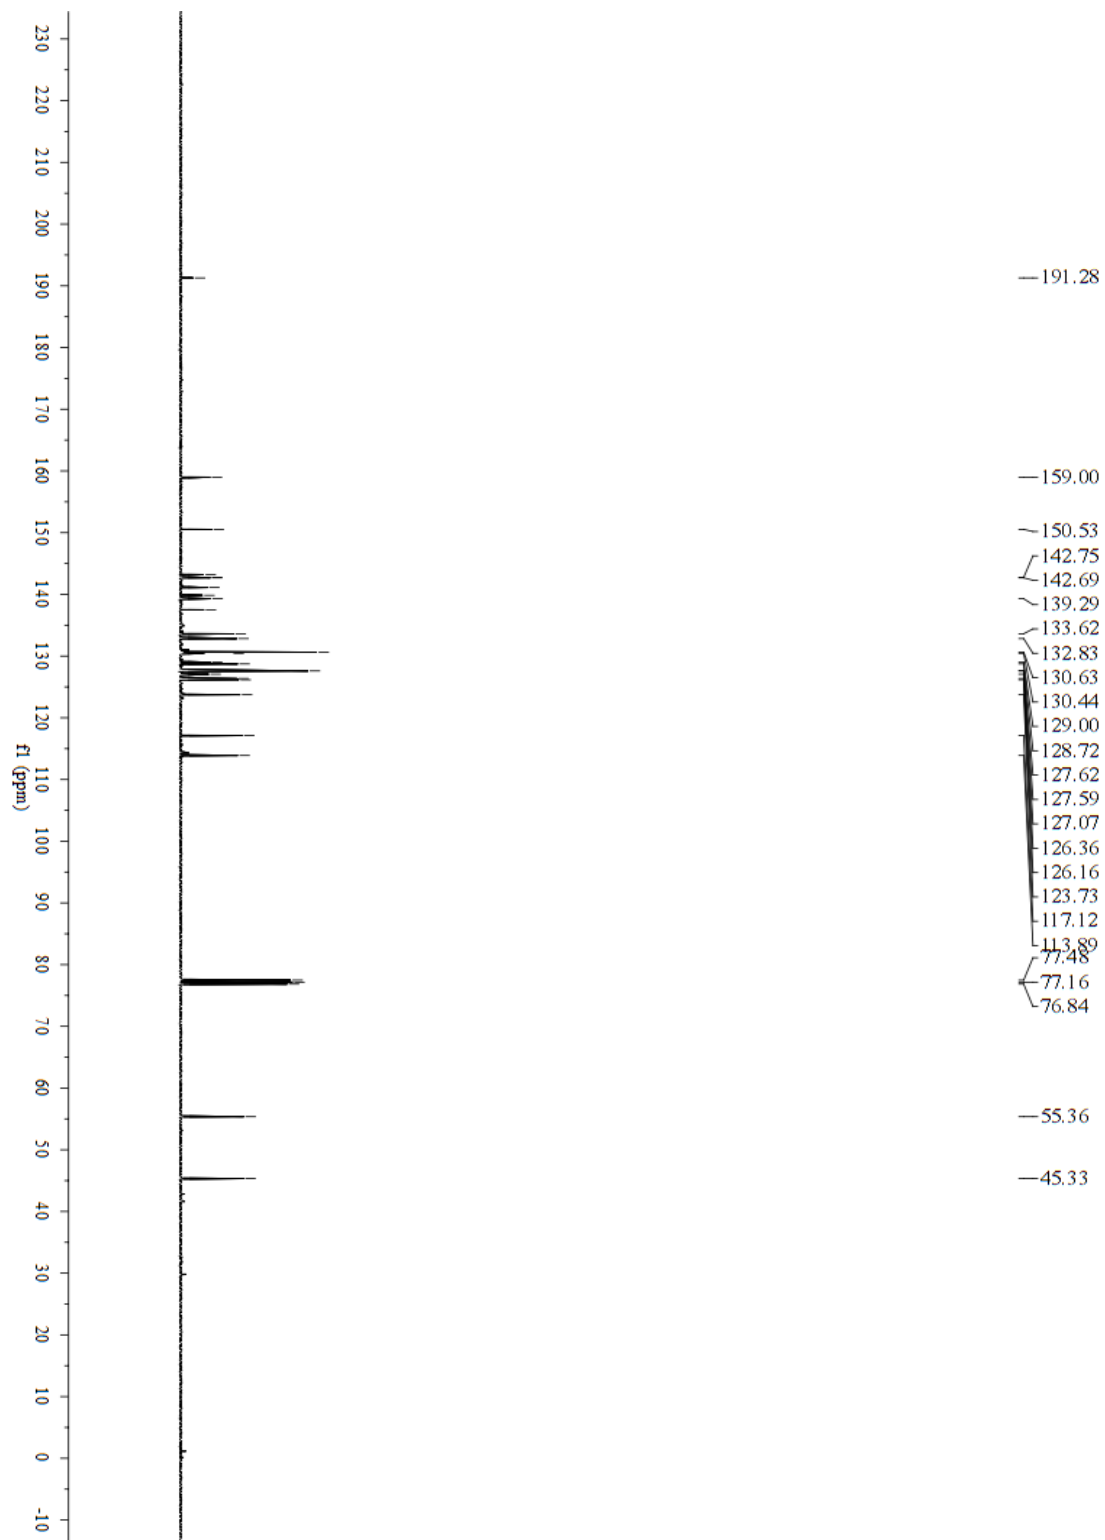

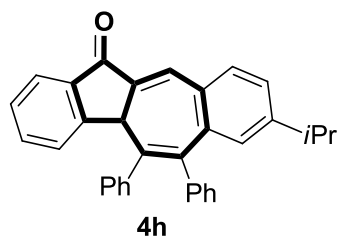

<sup>1</sup>H NMR (400 MHz, CDCl<sub>3</sub>)

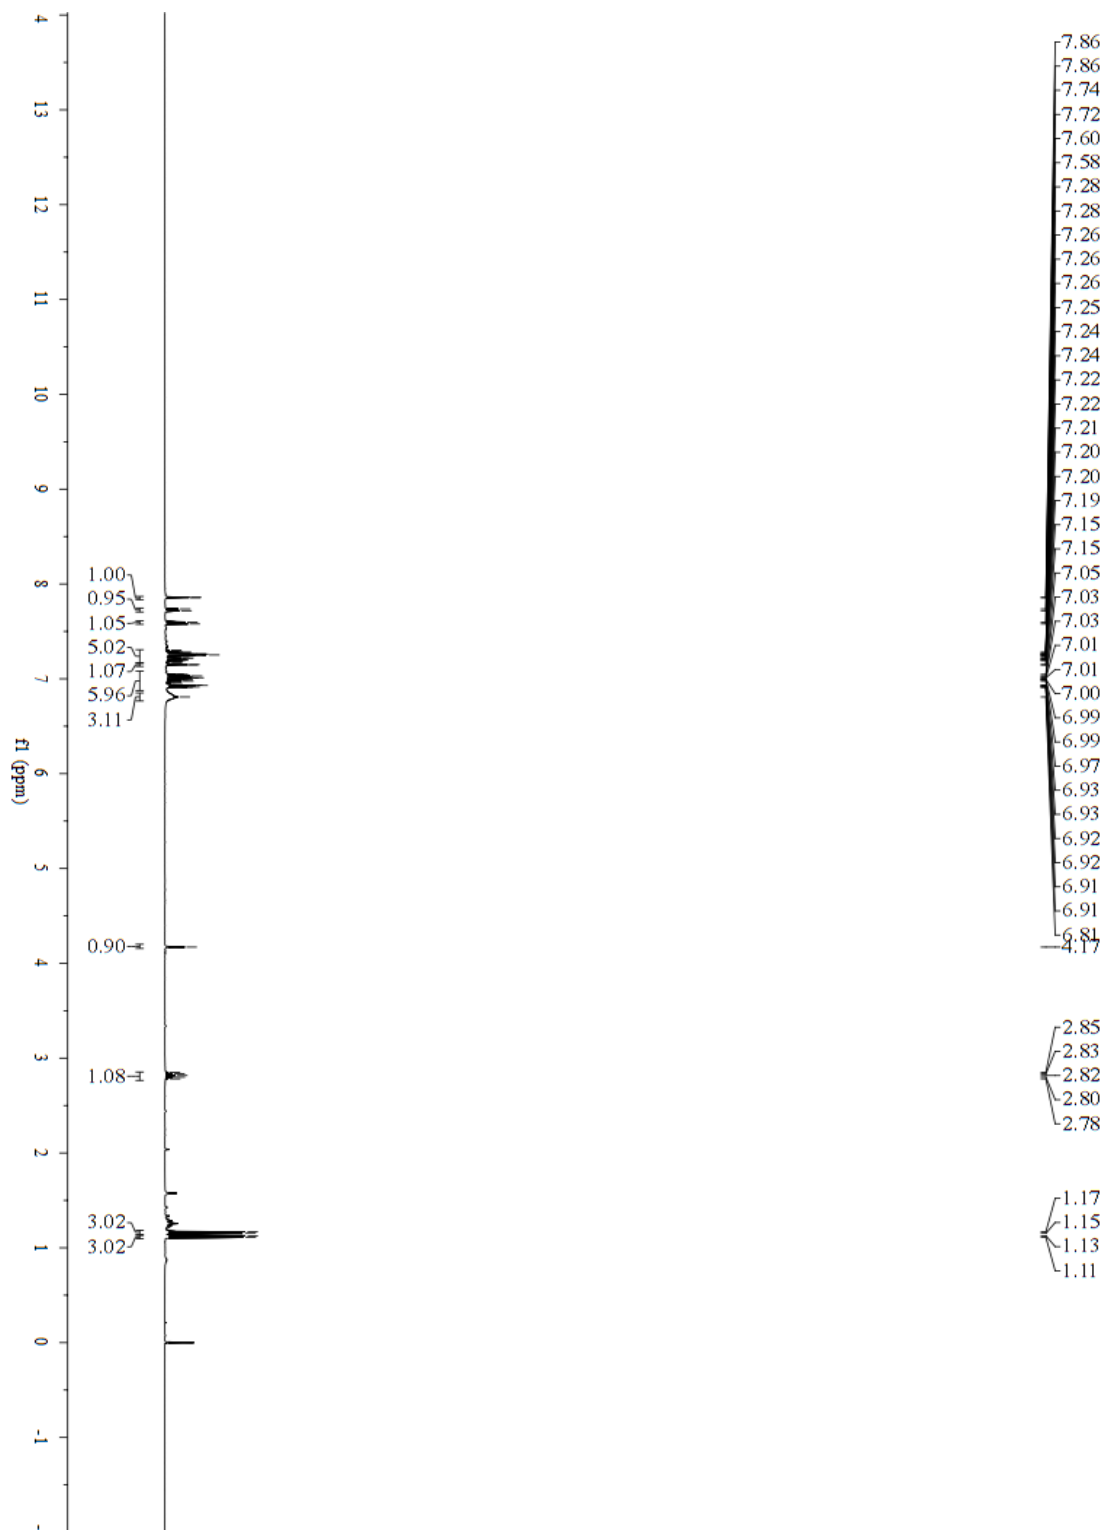

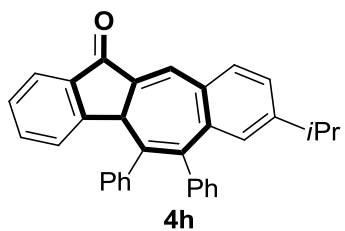

<sup>13</sup>C NMR (100 MHz, CDCl<sub>3</sub>)

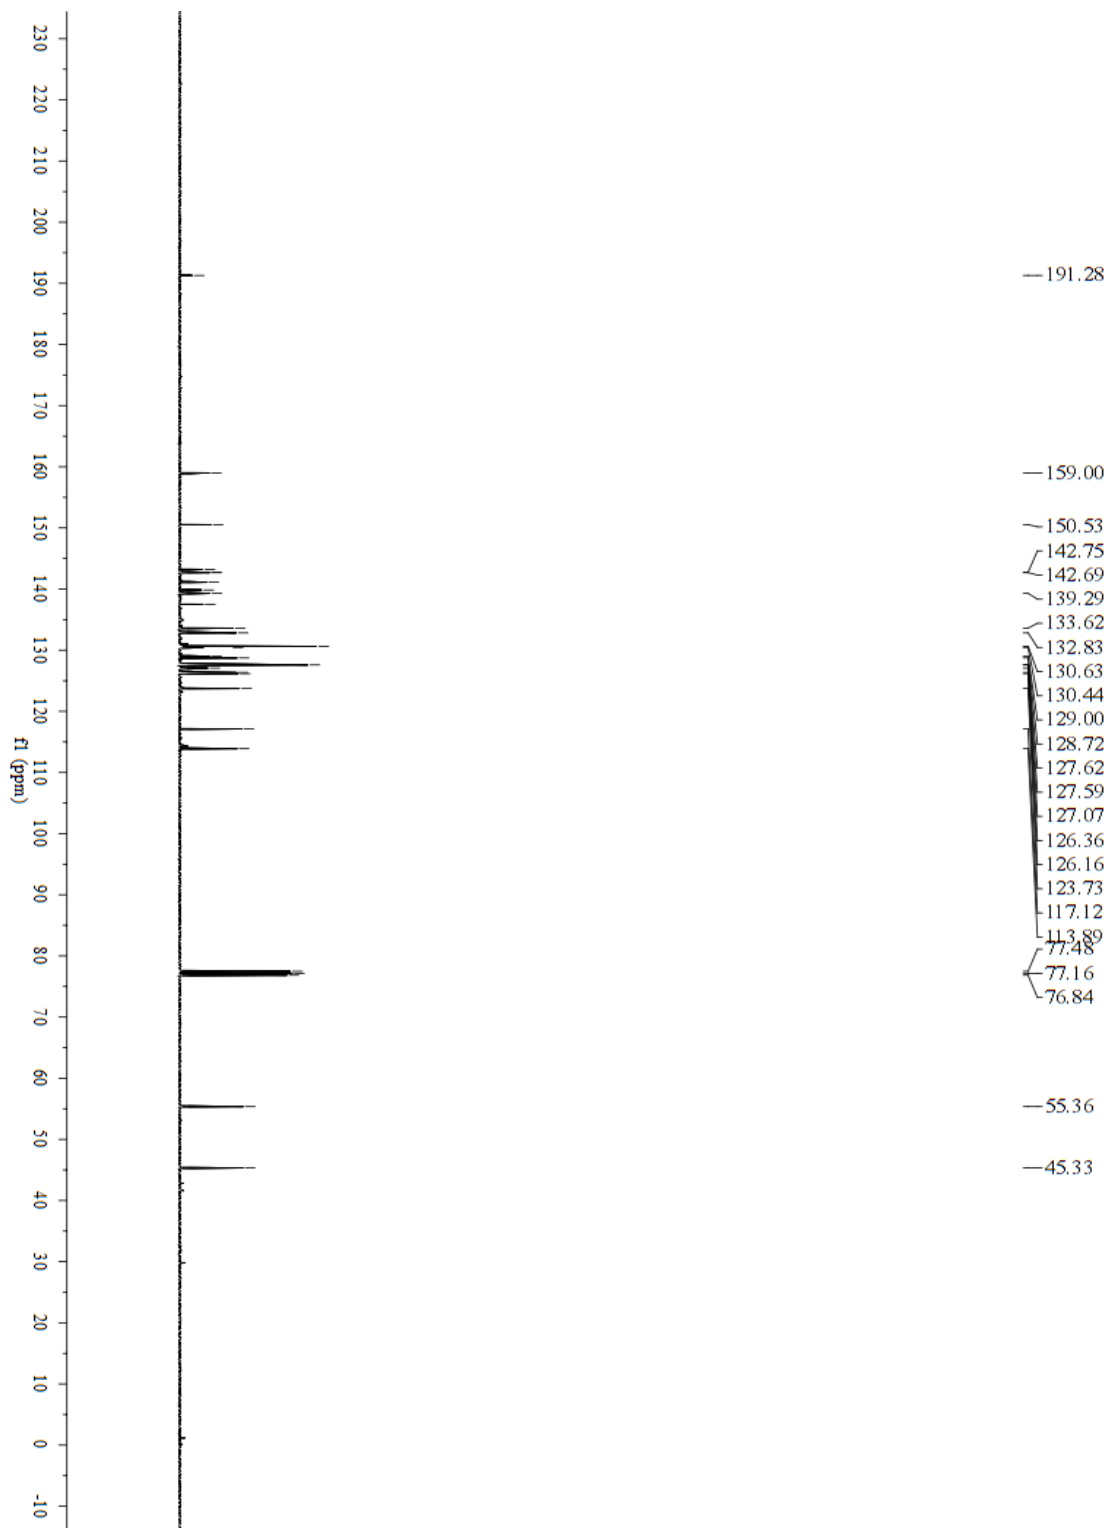

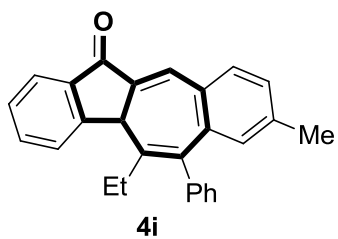

<sup>1</sup>H NMR (400 MHz, CDCl<sub>3</sub>)

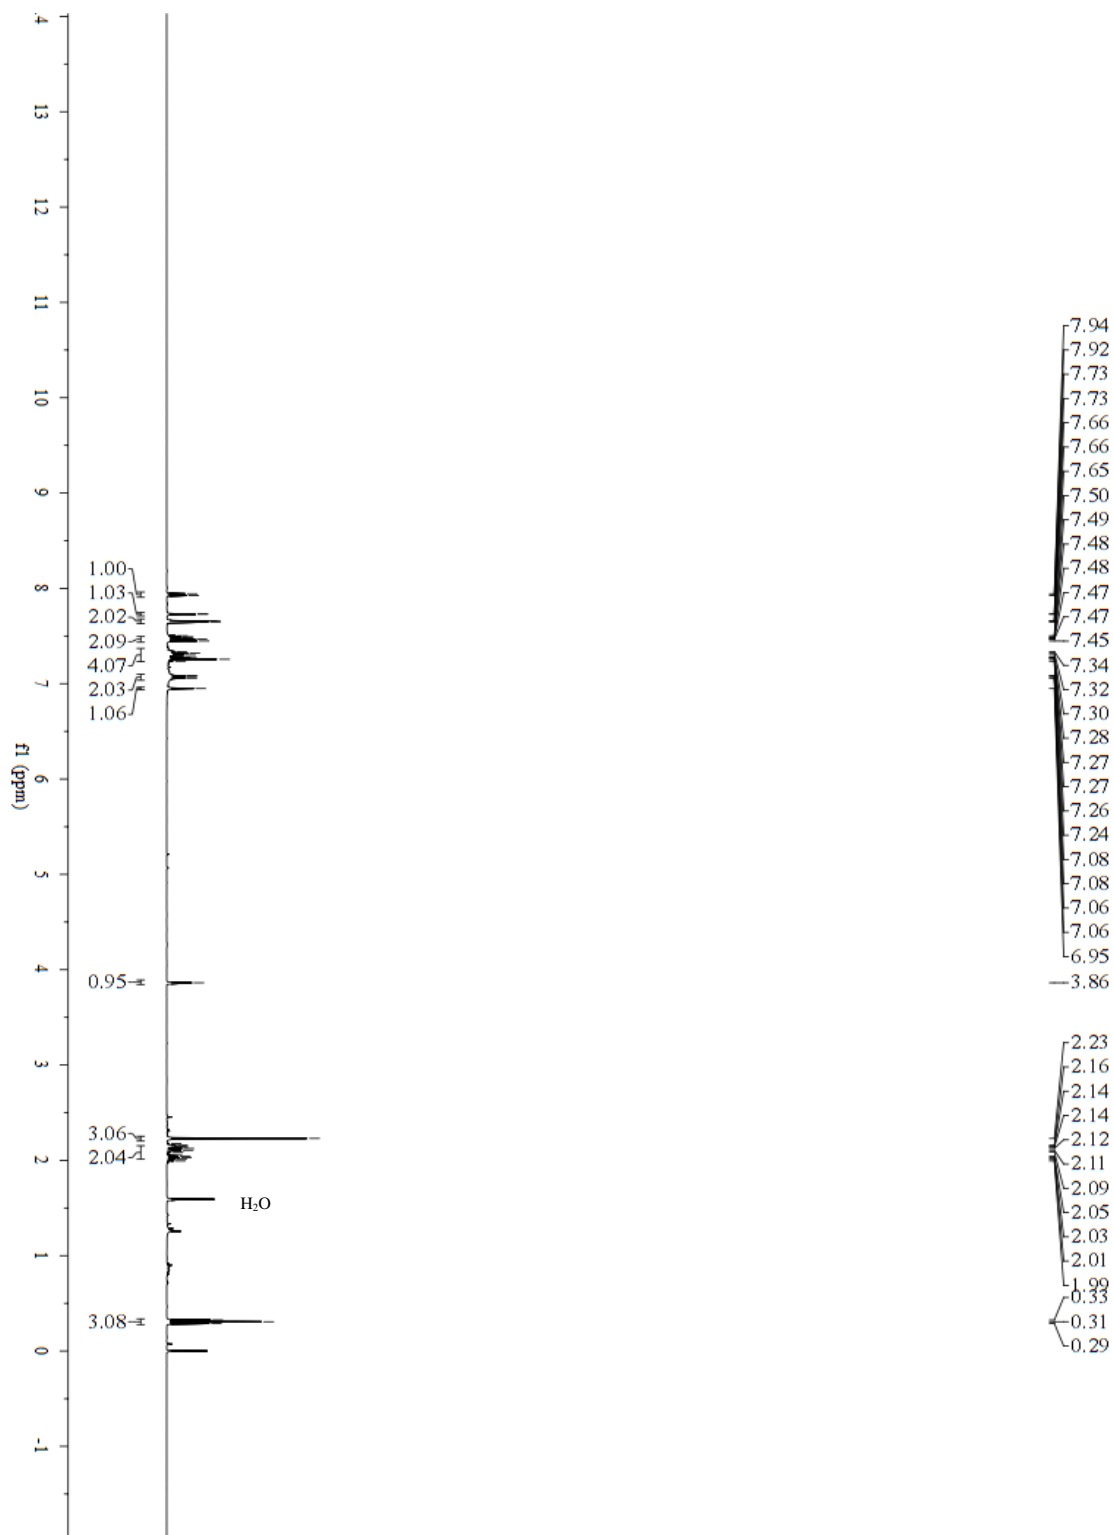

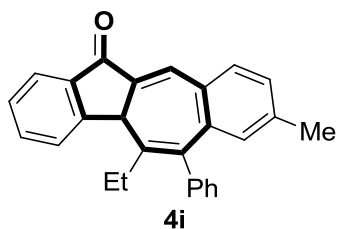

<sup>13</sup>C NMR (100 MHz, CDCl<sub>3</sub>)

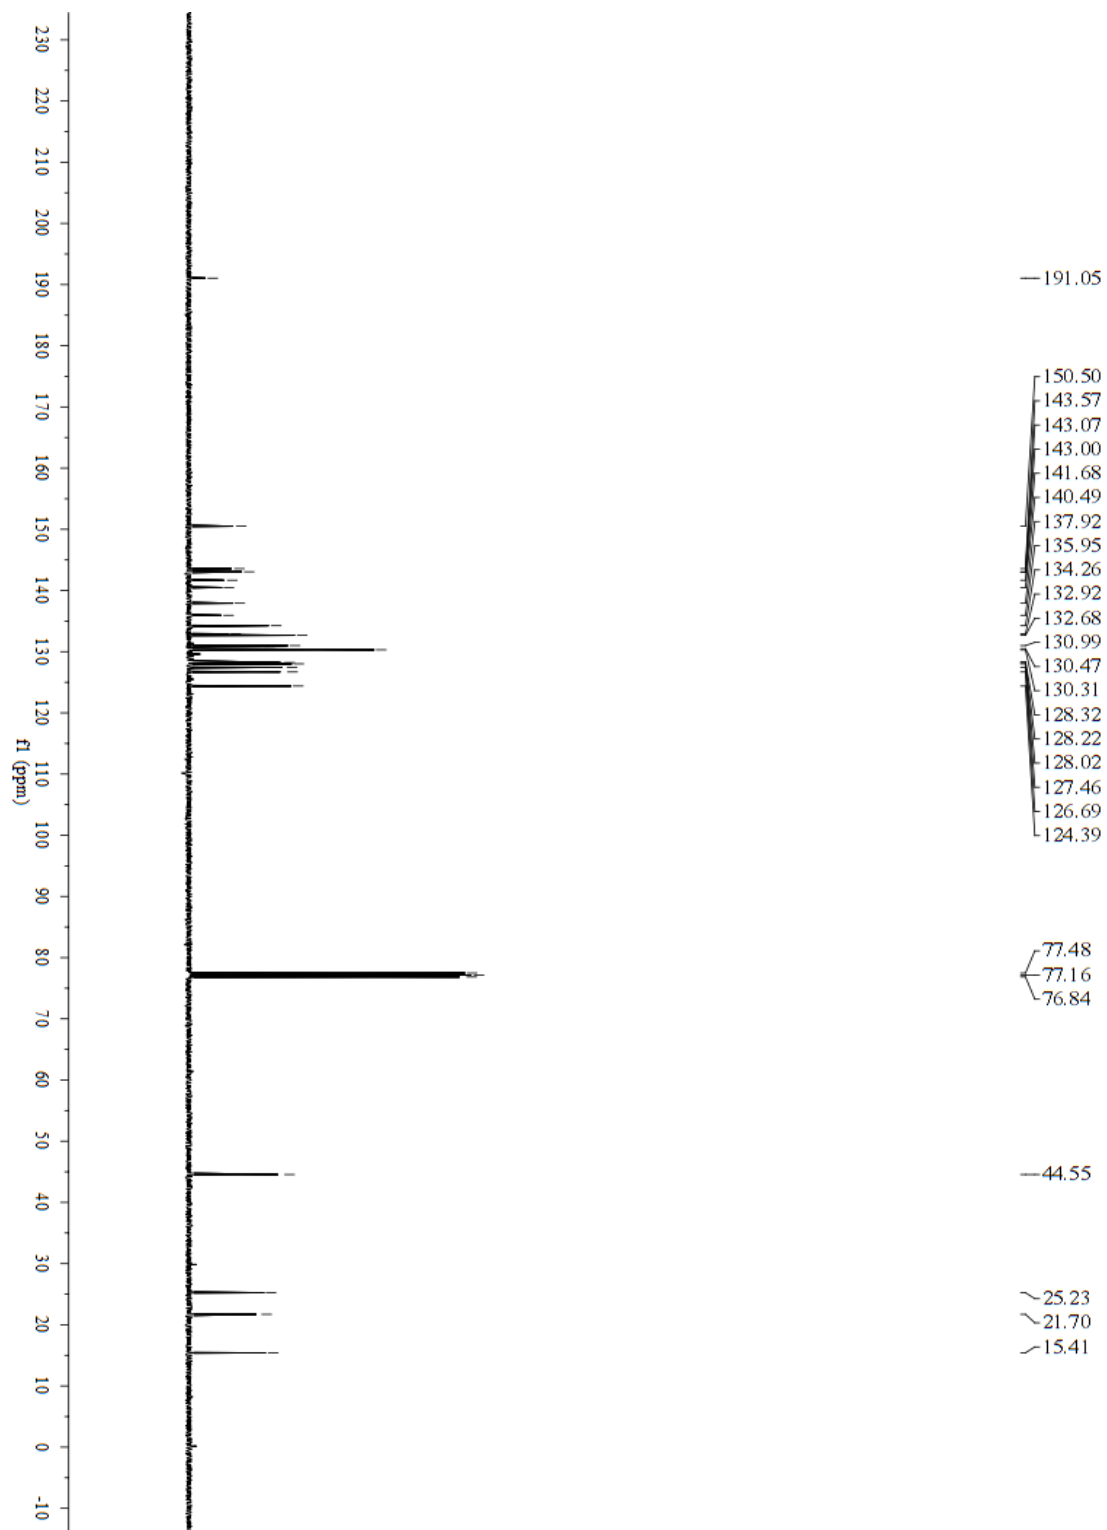



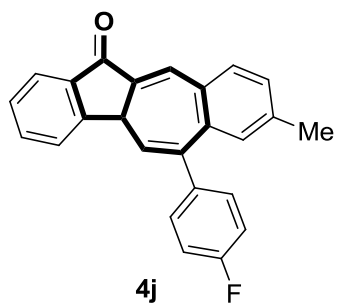

$^1\text{H NMR}$  (400 MHz,  $\text{CDCl}_3$ )

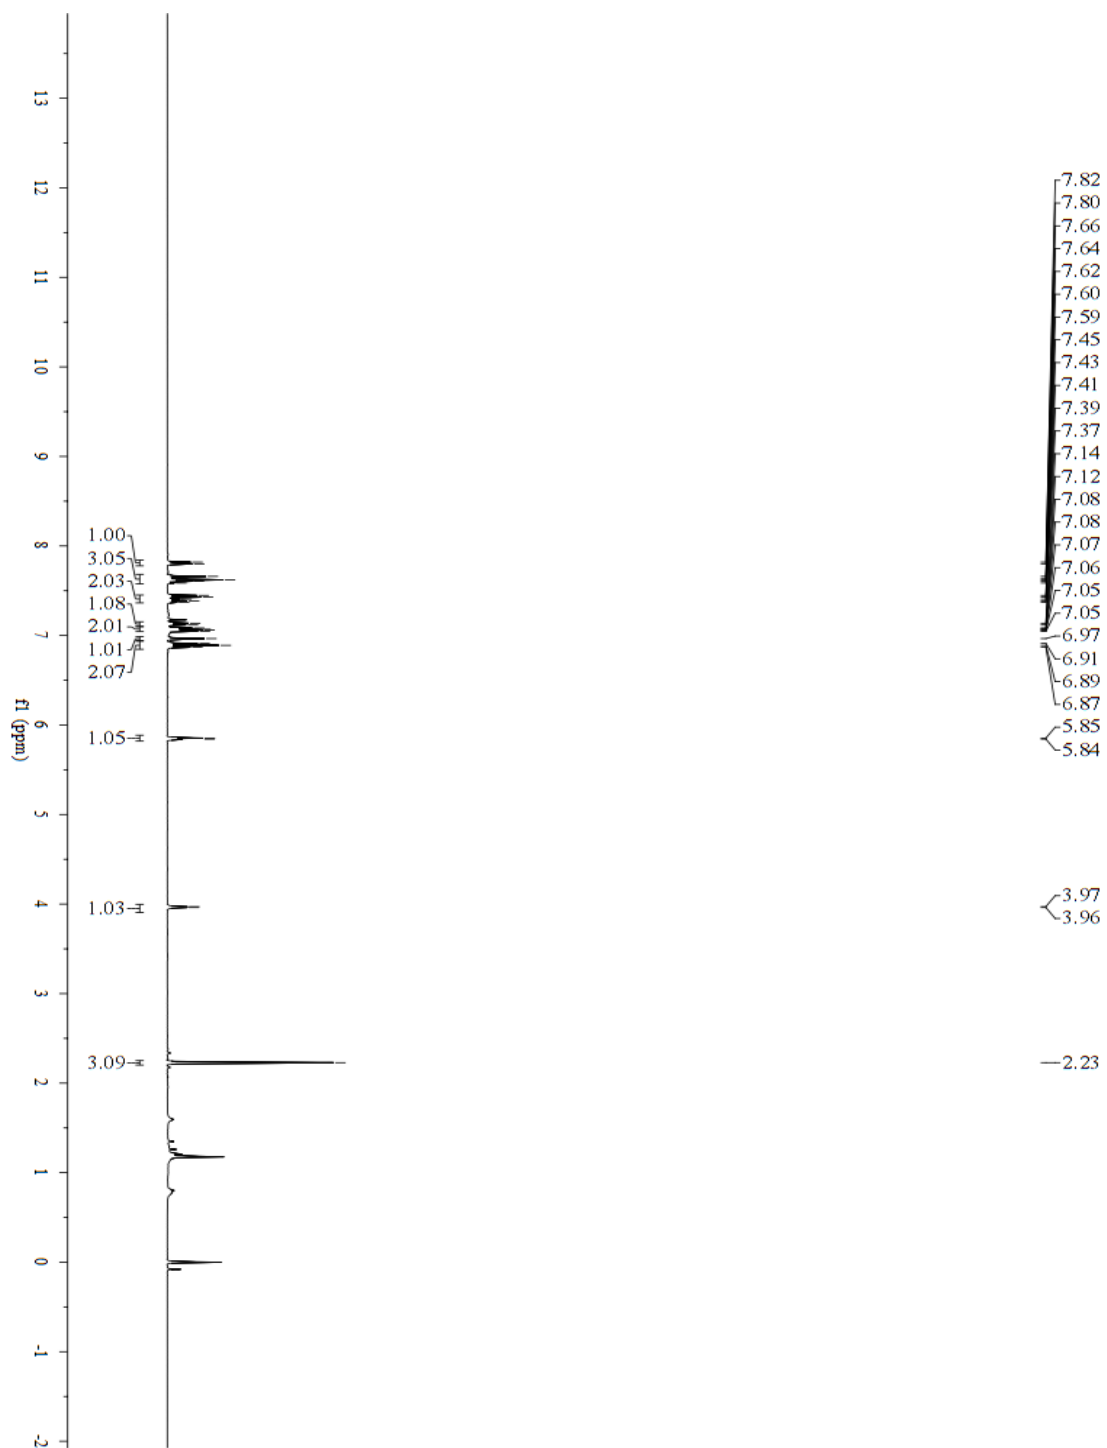

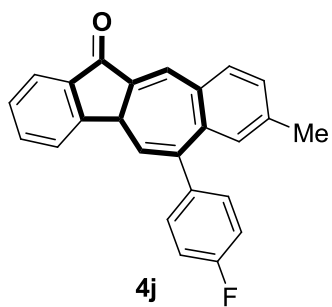

$^{13}\text{C}$  NMR (100 MHz,  $\text{CDCl}_3$ )

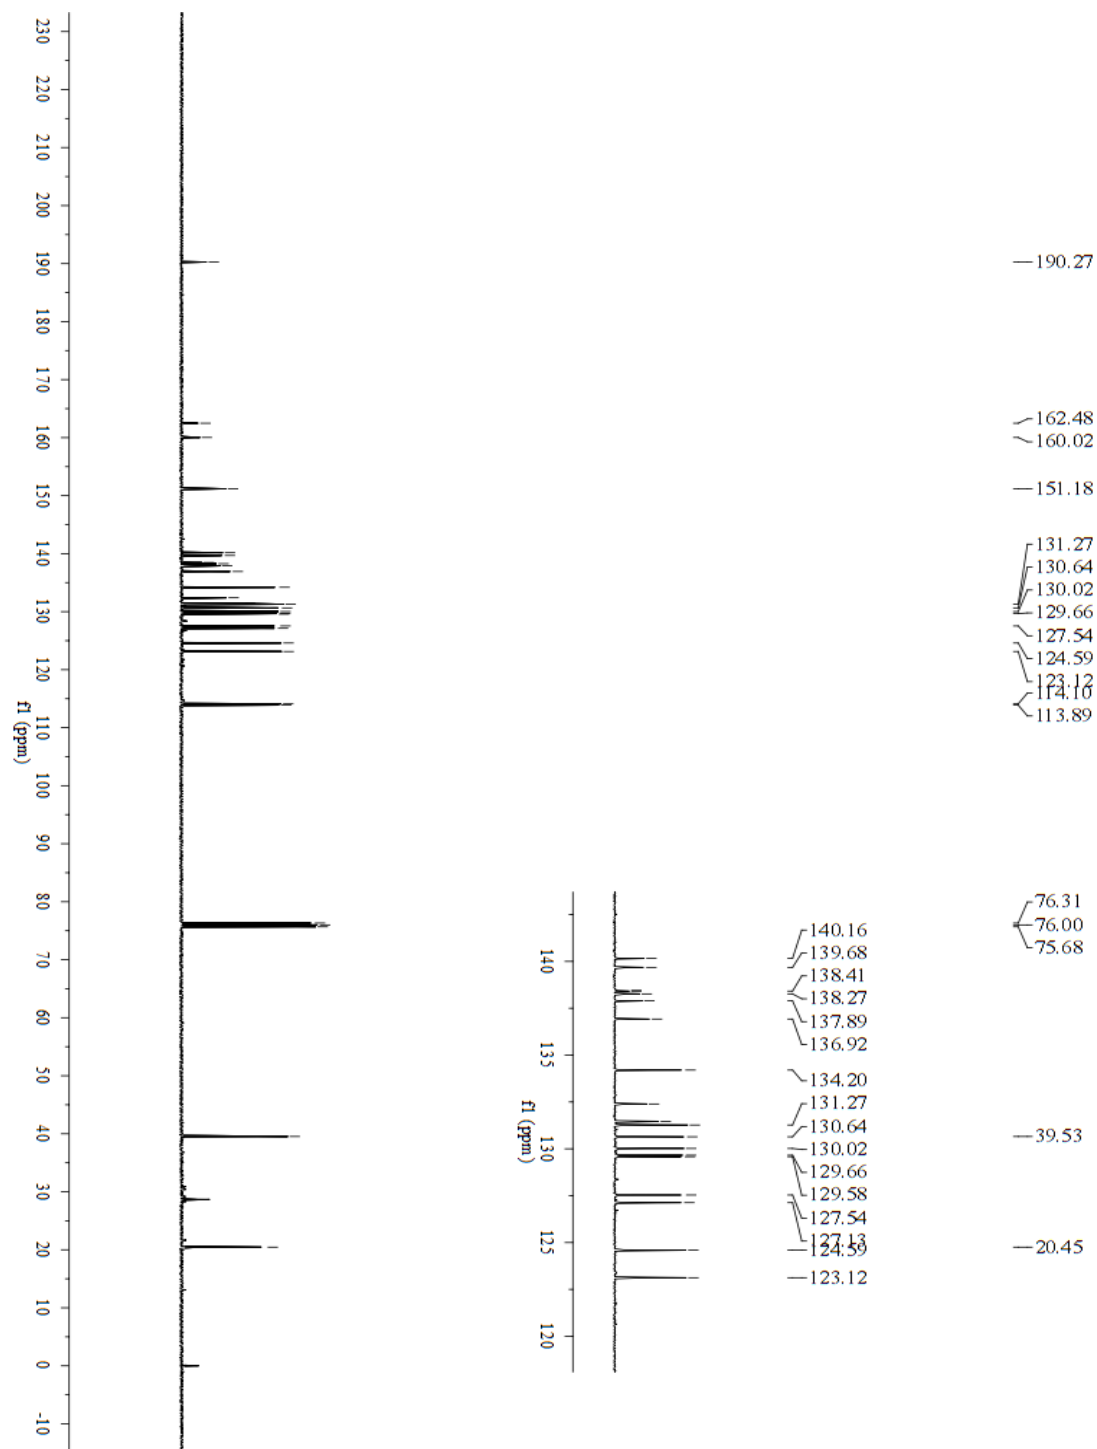

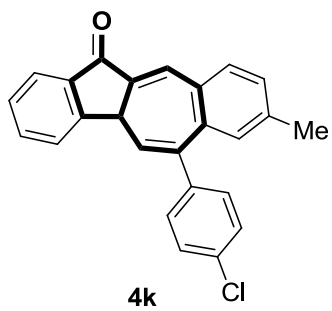

<sup>1</sup>H NMR (400 MHz, CDCl<sub>3</sub>)

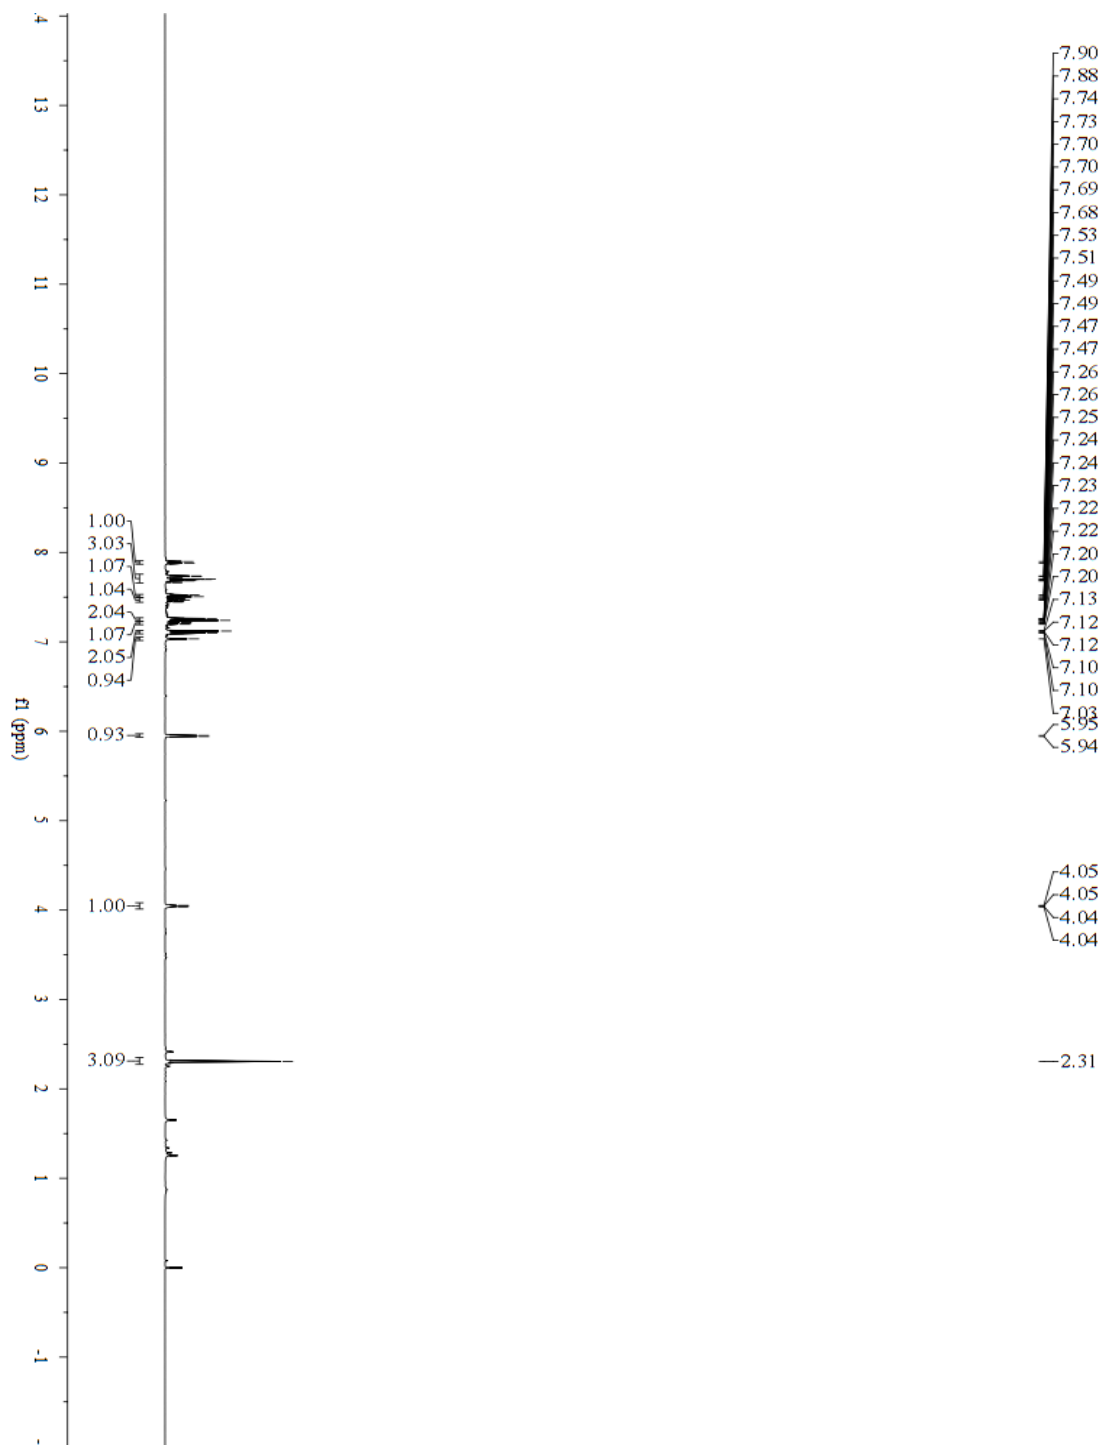

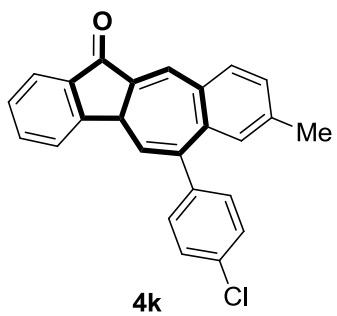

<sup>13</sup>C NMR (100 MHz, CDCl<sub>3</sub>)

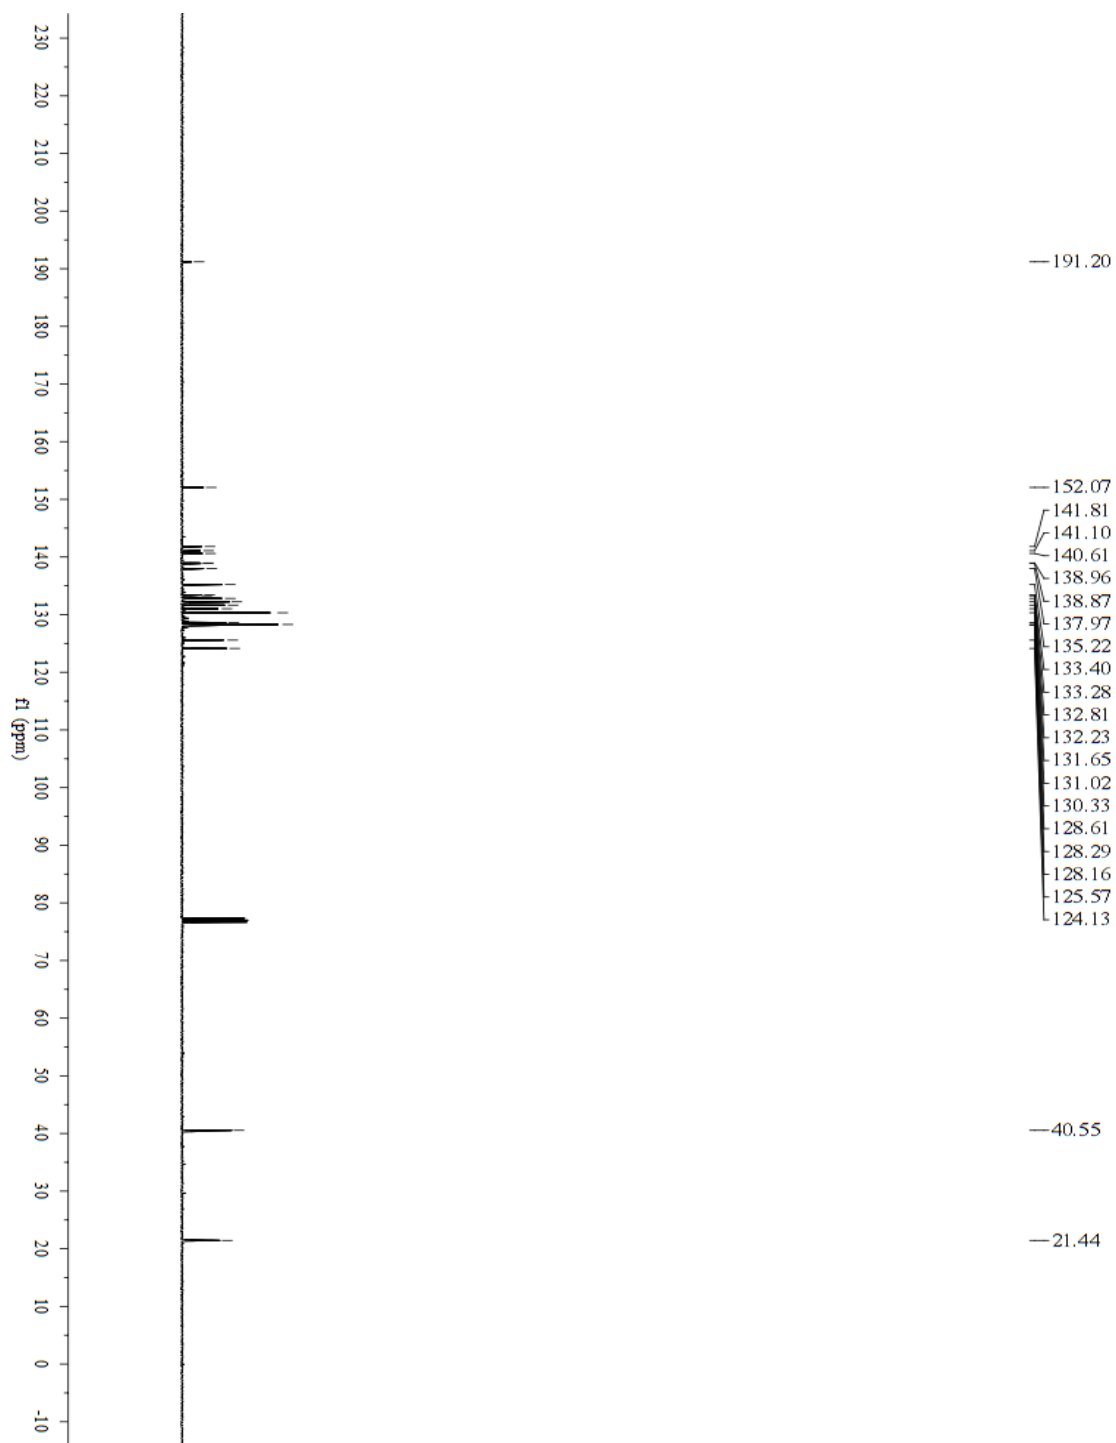

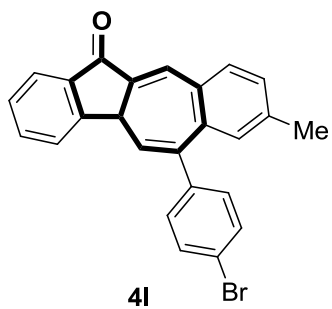

<sup>1</sup>H NMR (400 MHz, CDCl<sub>3</sub>)

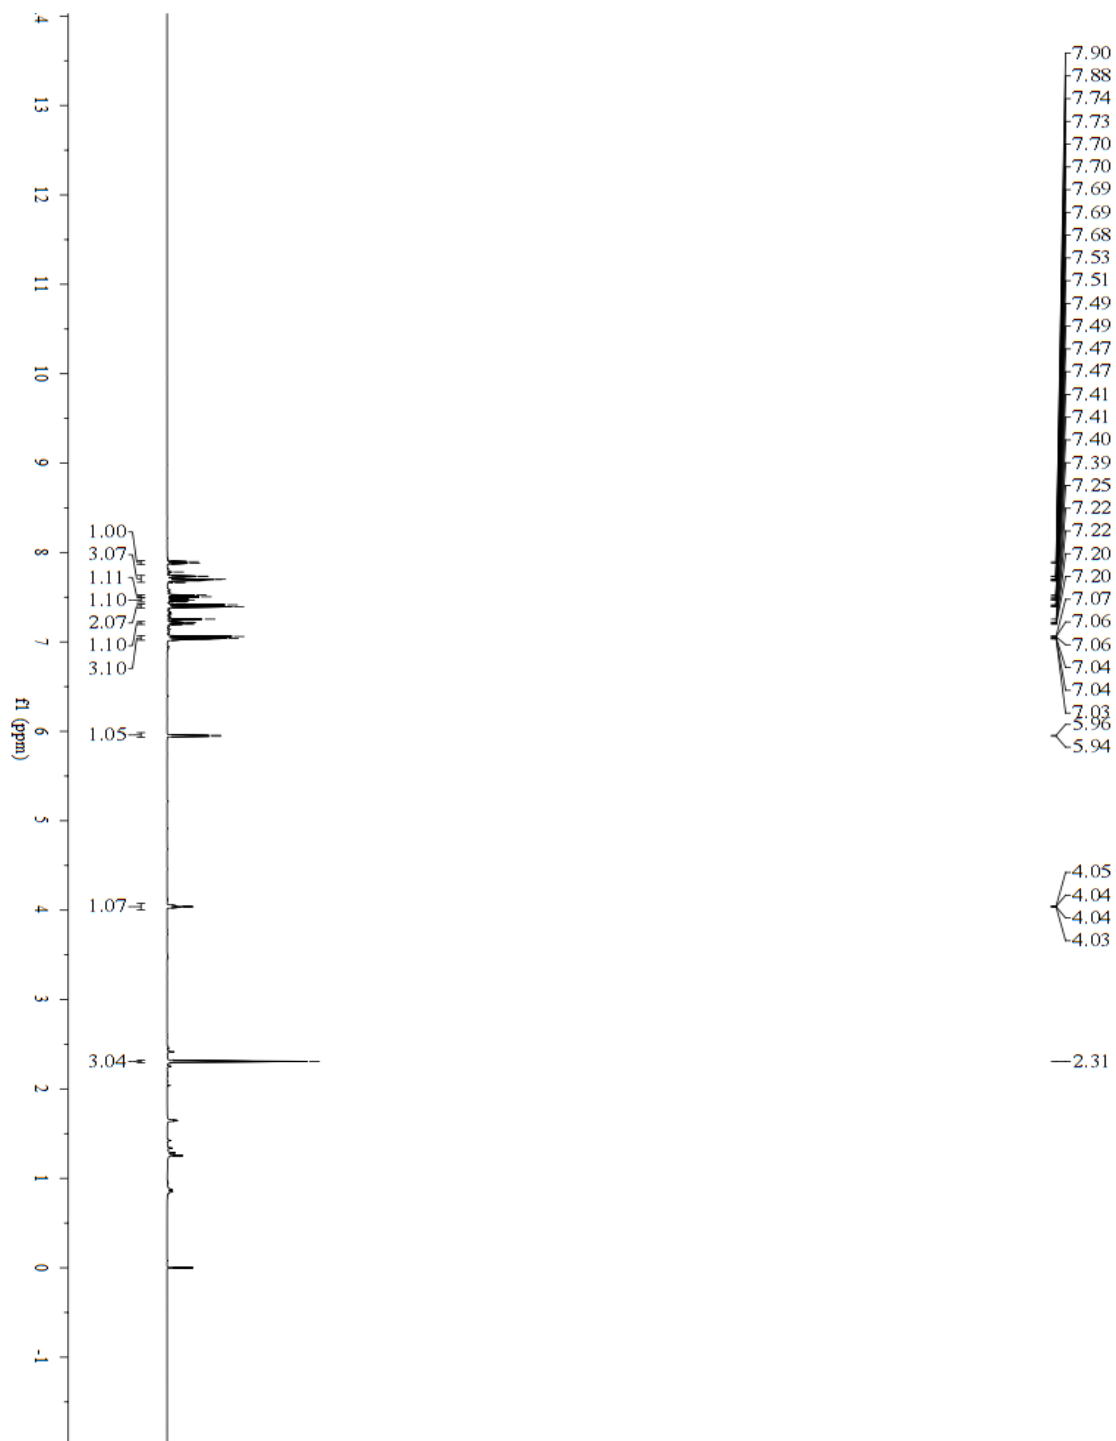

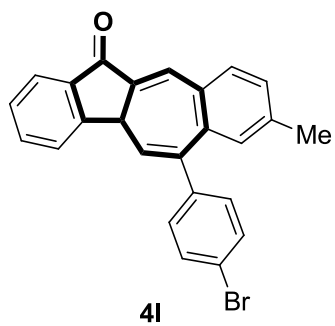

<sup>13</sup>C NMR (100 MHz, CDCl<sub>3</sub>)

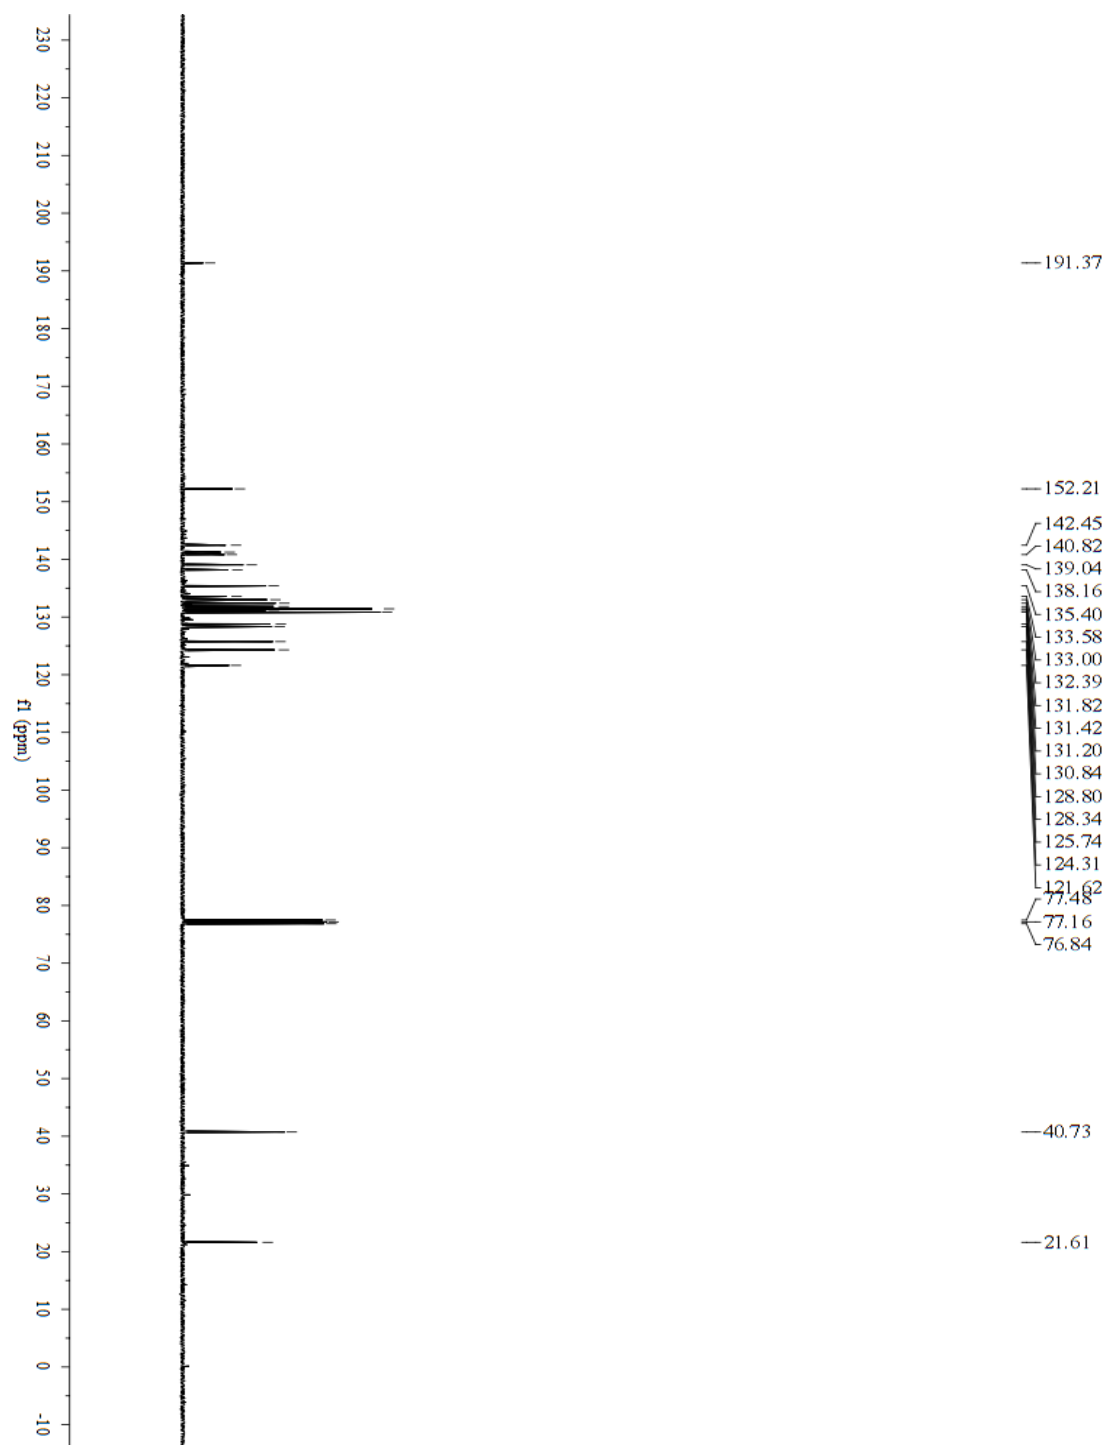

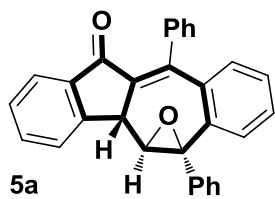

<sup>1</sup>H NMR (400 MHz, CDCl<sub>3</sub>)

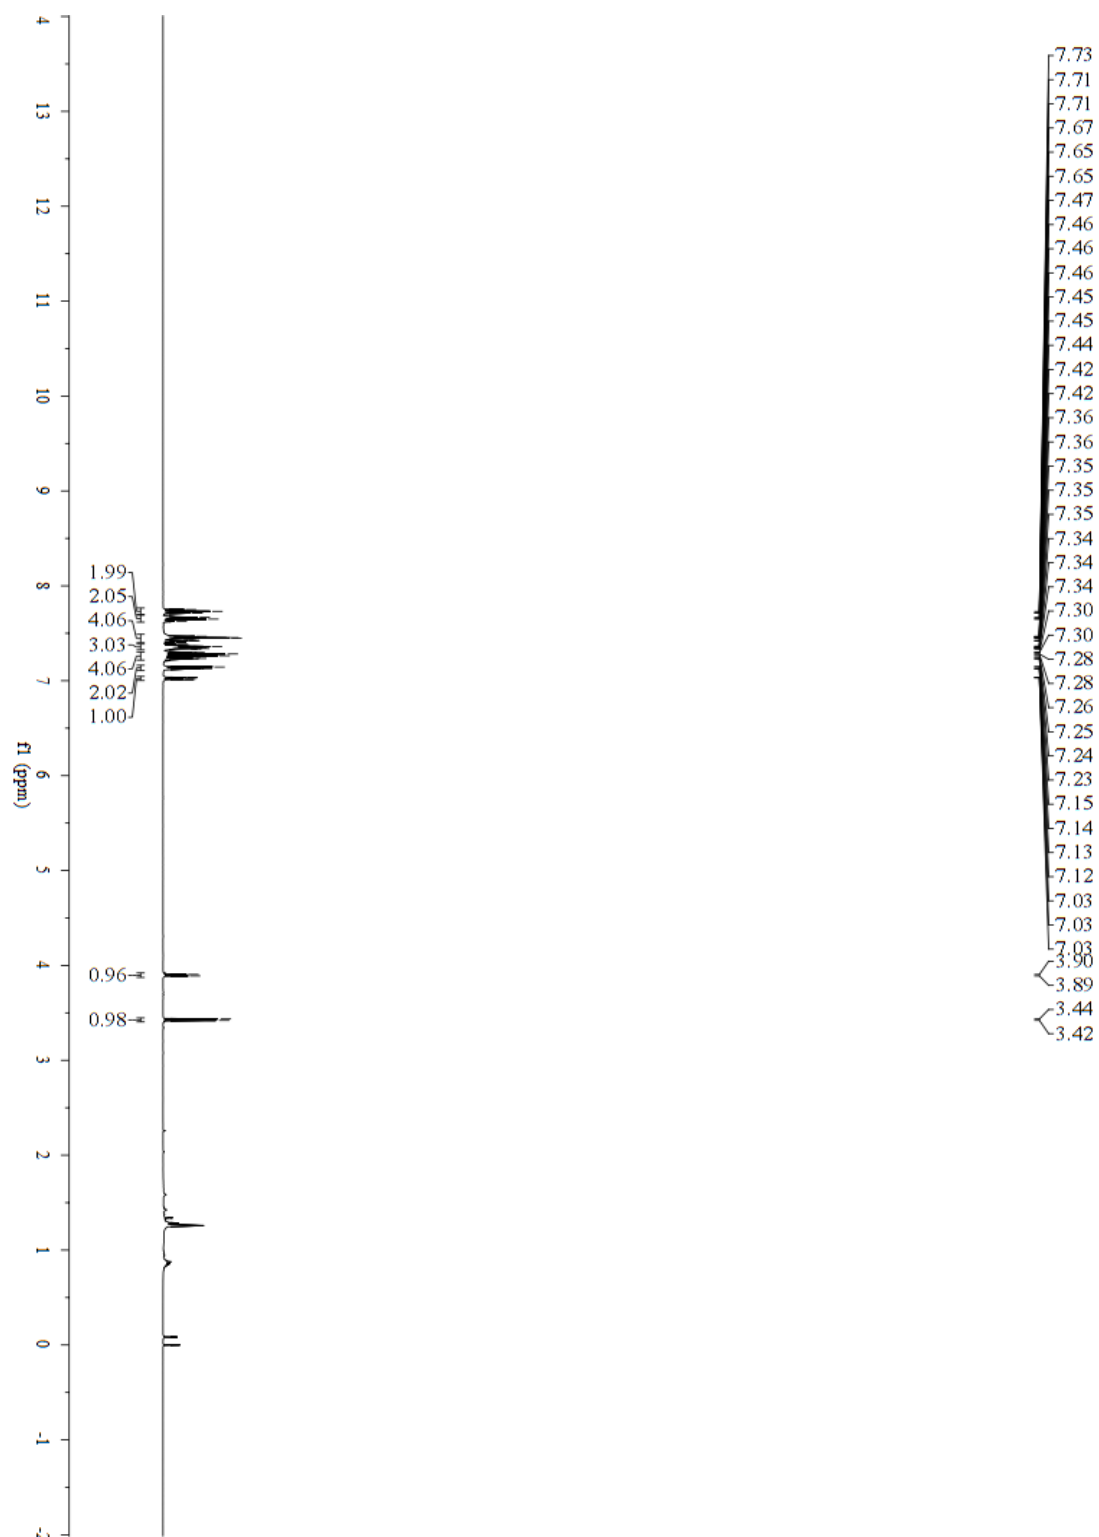

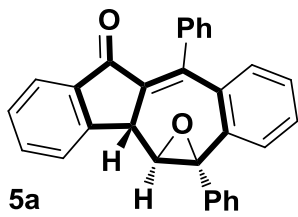

$^{13}\text{C}$  NMR (100 MHz,  $\text{CDCl}_3$ )

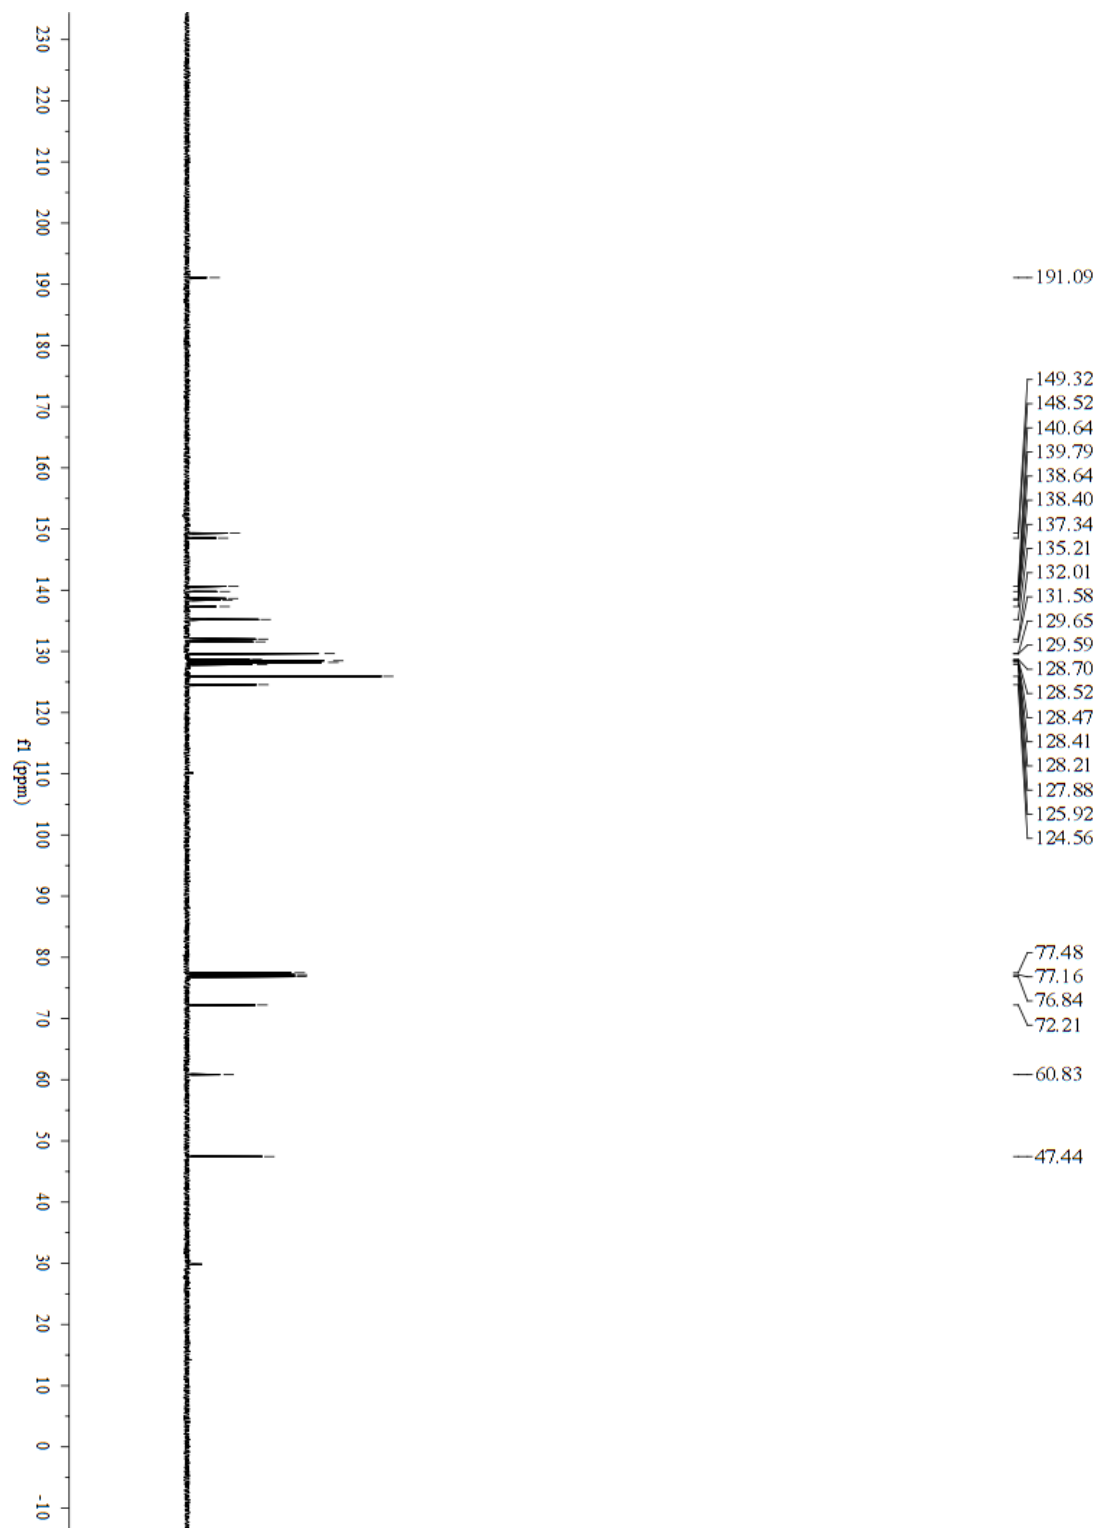



## 5a-DEPT

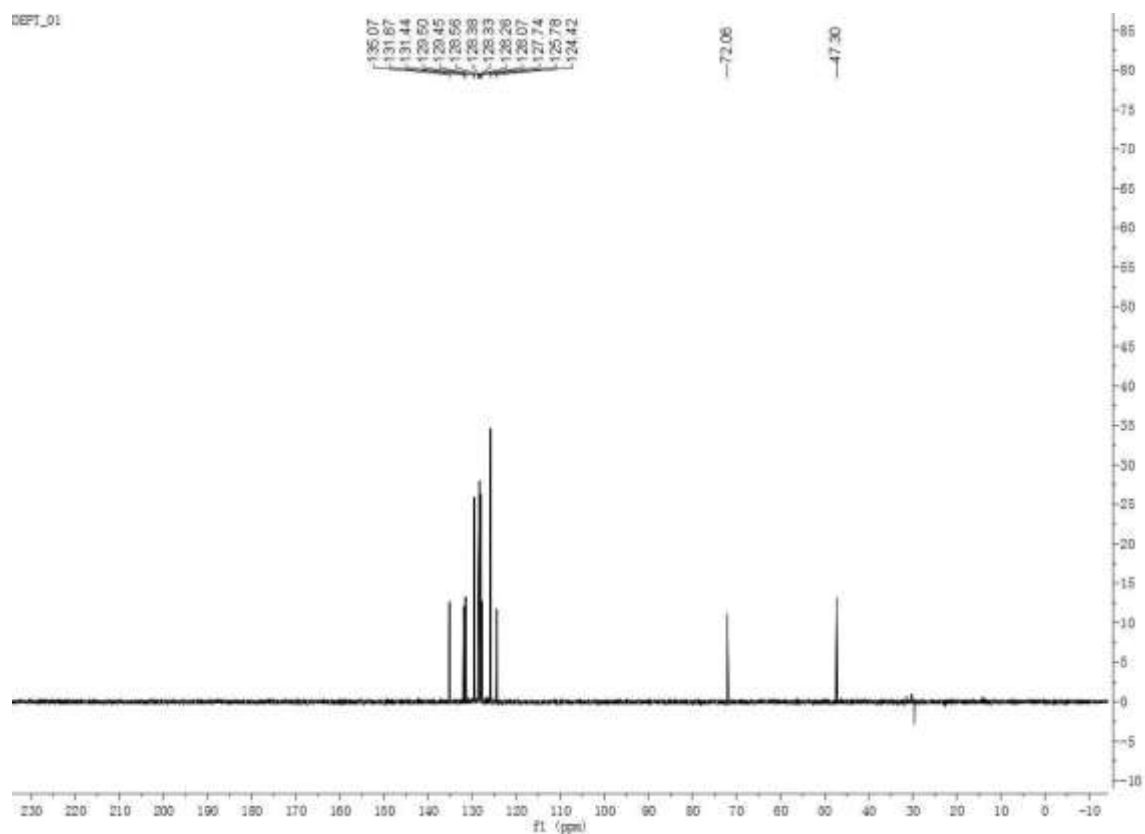

## 5a- $^1\text{H}$ - $^1\text{H}$ COSY

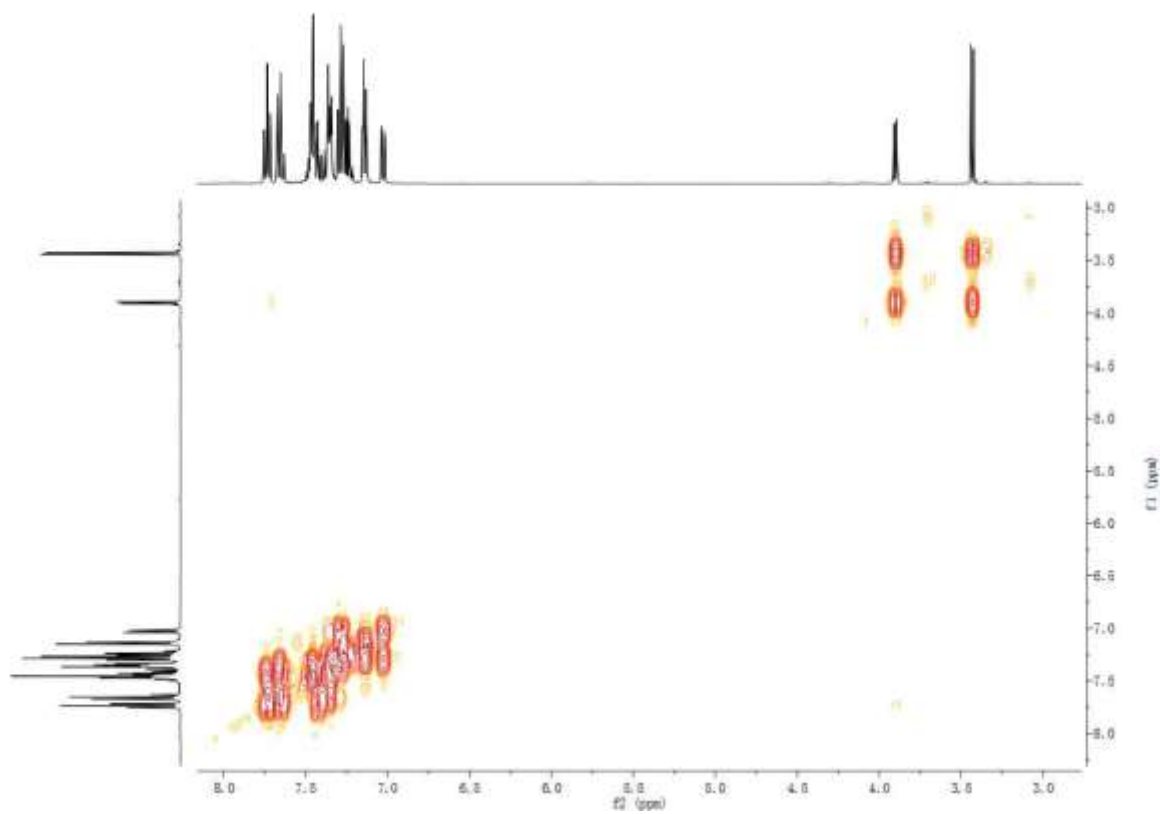

### 5a- HMBC

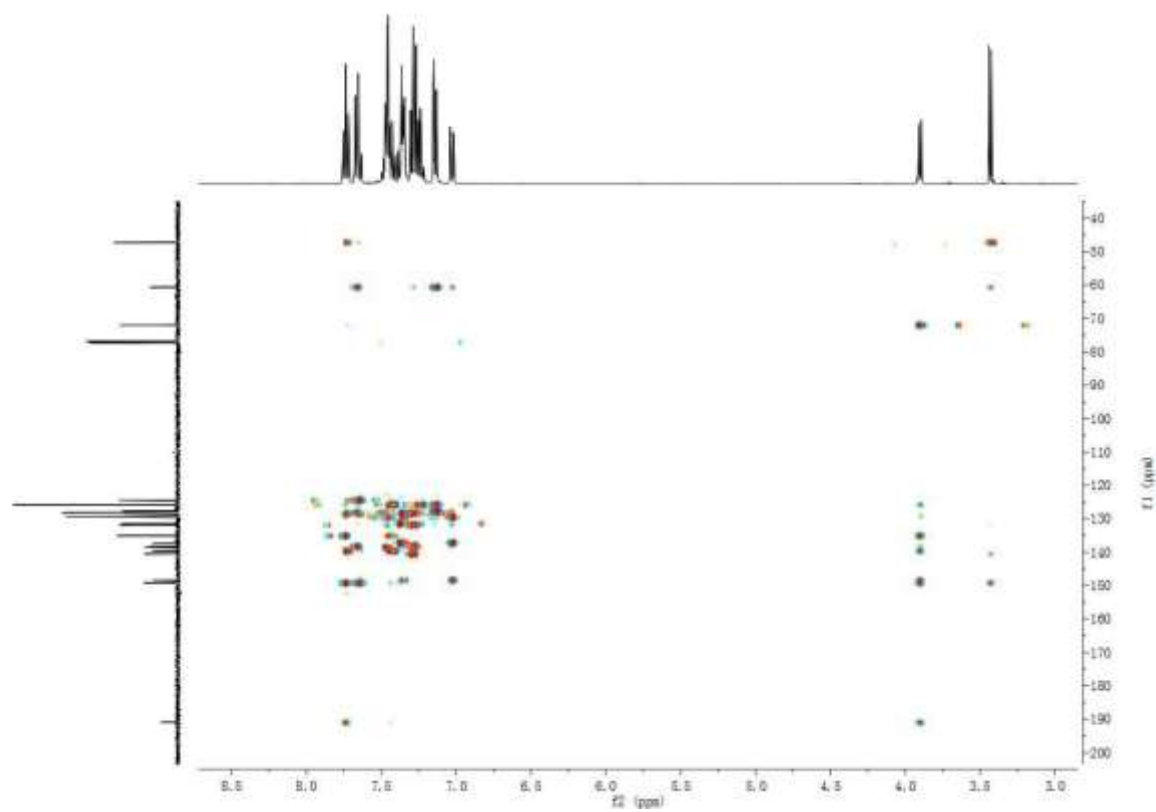

### 5a- HSQC

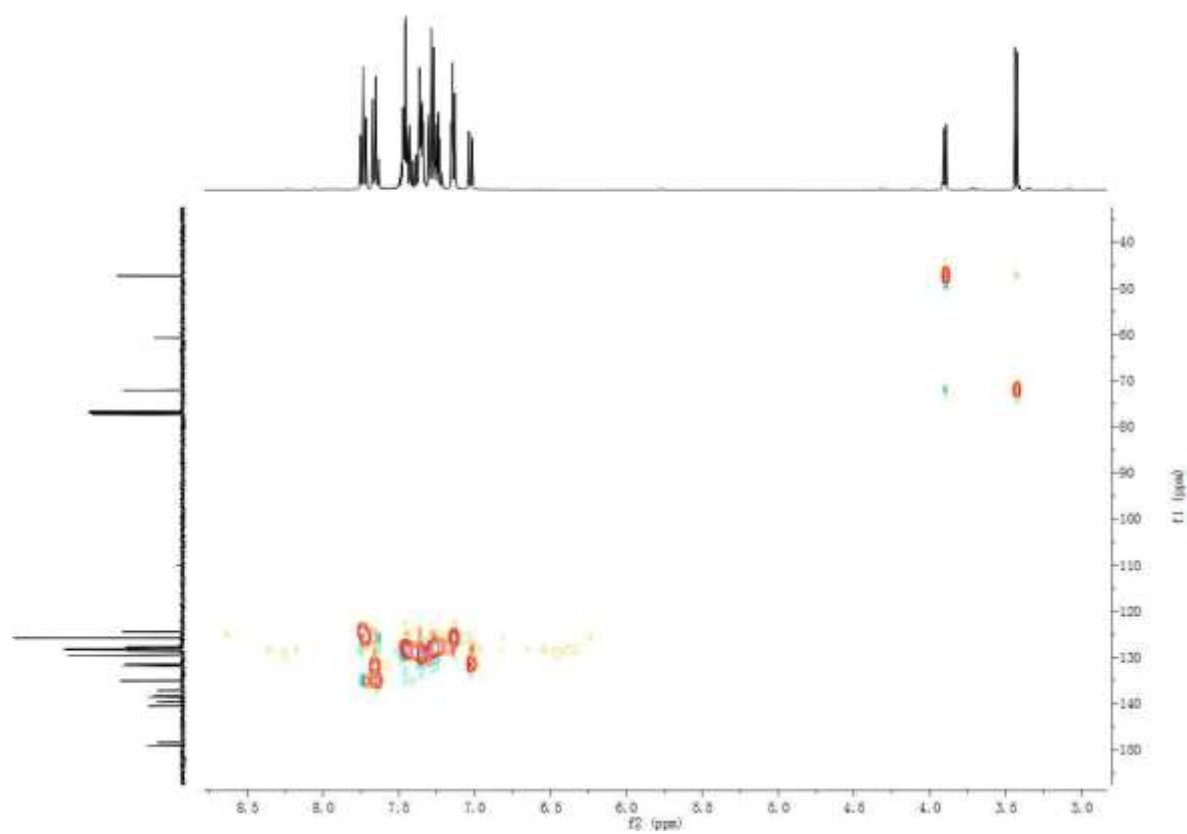

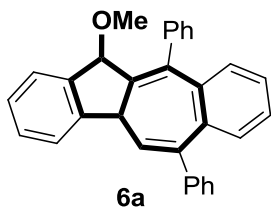

**6a**  
<sup>1</sup>H NMR (400 MHz, CDCl<sub>3</sub>)

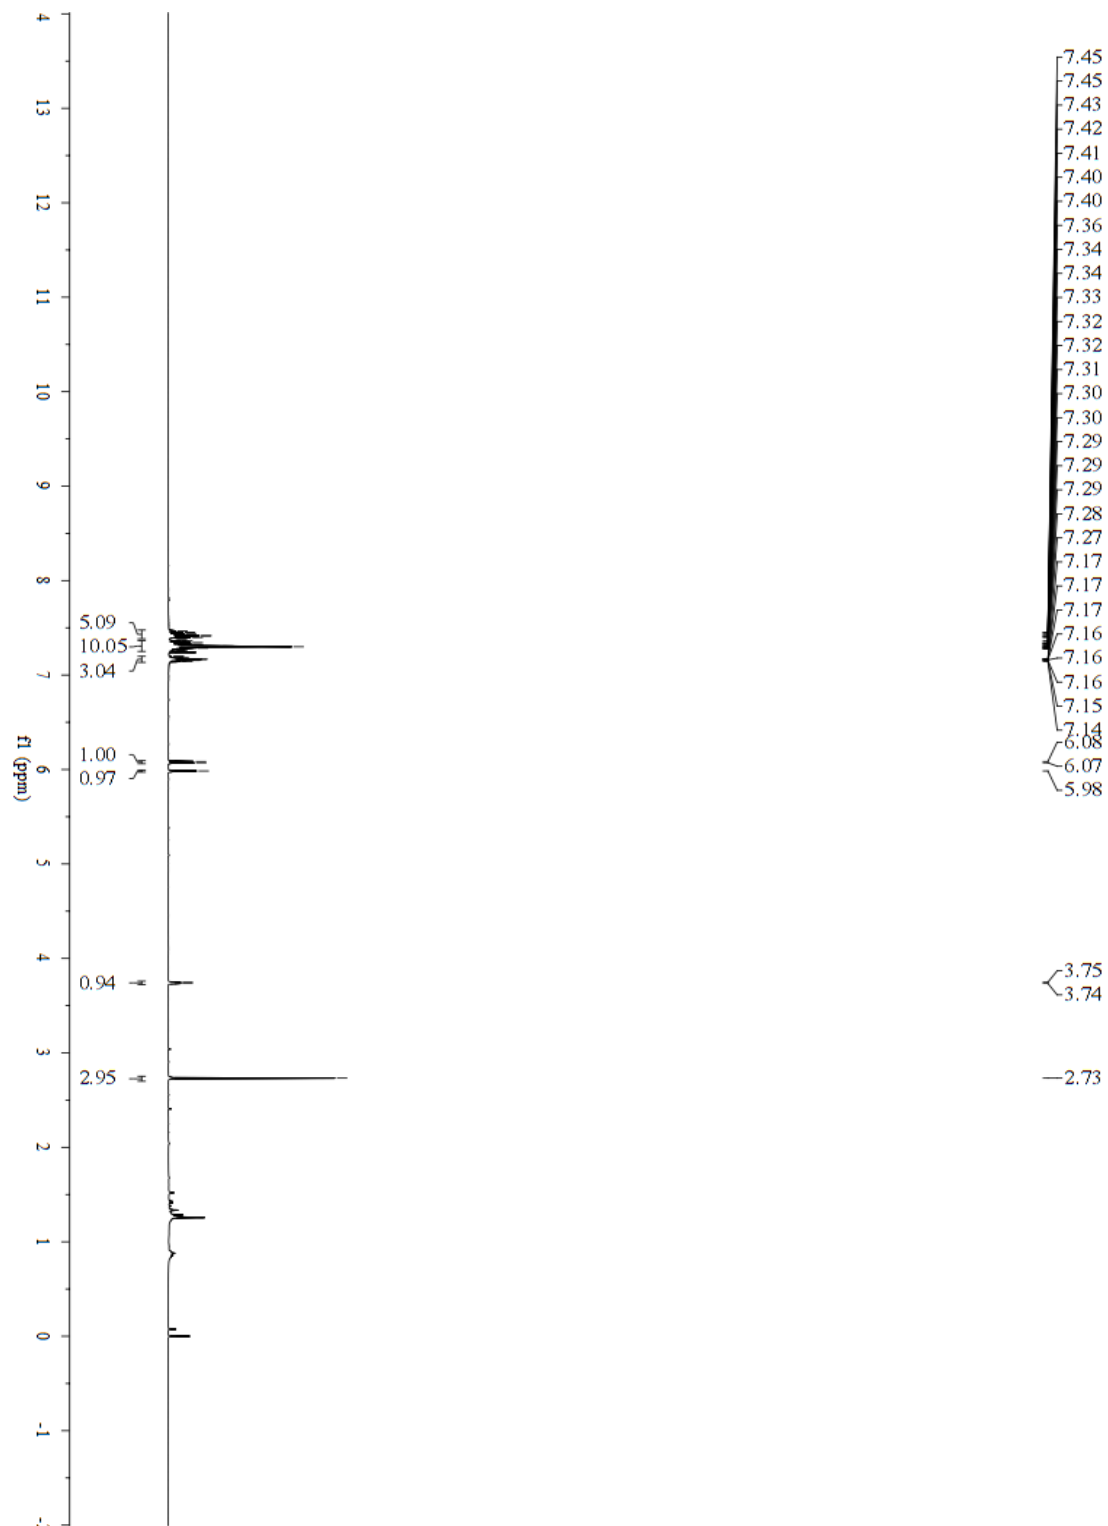

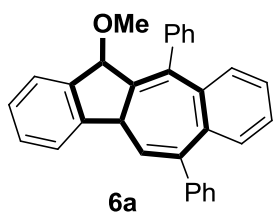

$^{13}\text{C}$  NMR (100 MHz,  $\text{CDCl}_3$ )

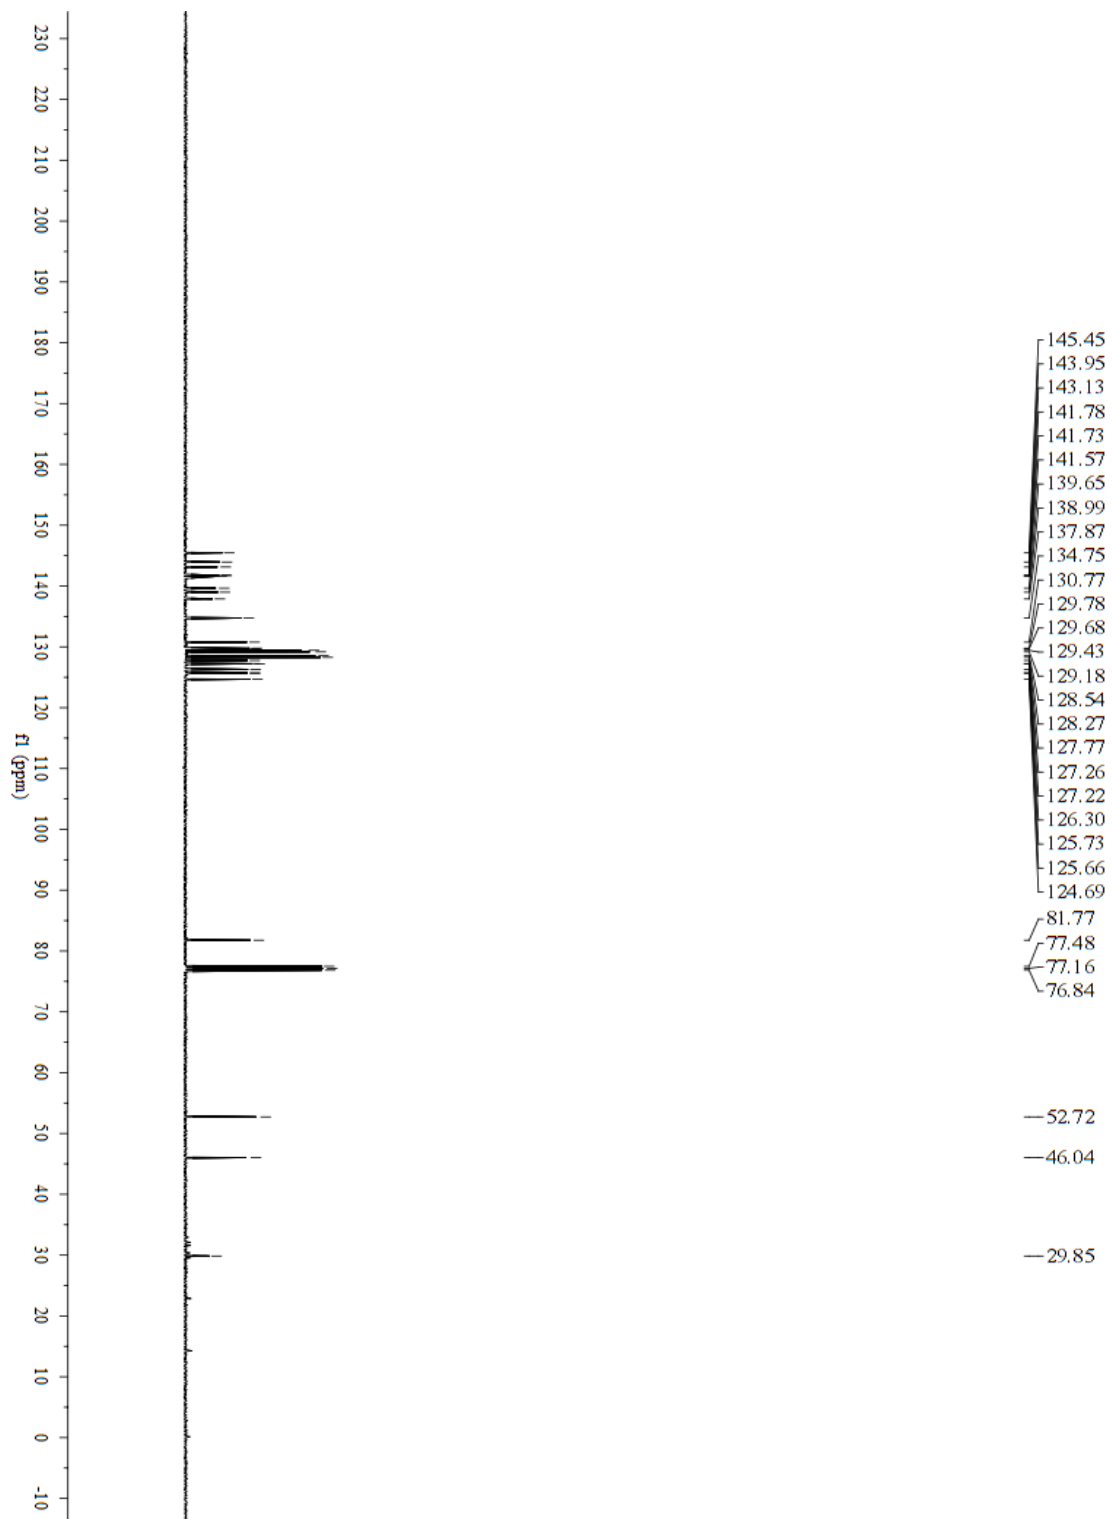

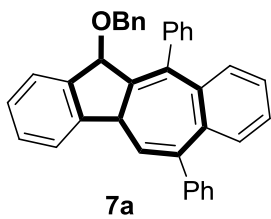

**7a**  
<sup>1</sup>H NMR (400 MHz, CDCl<sub>3</sub>)

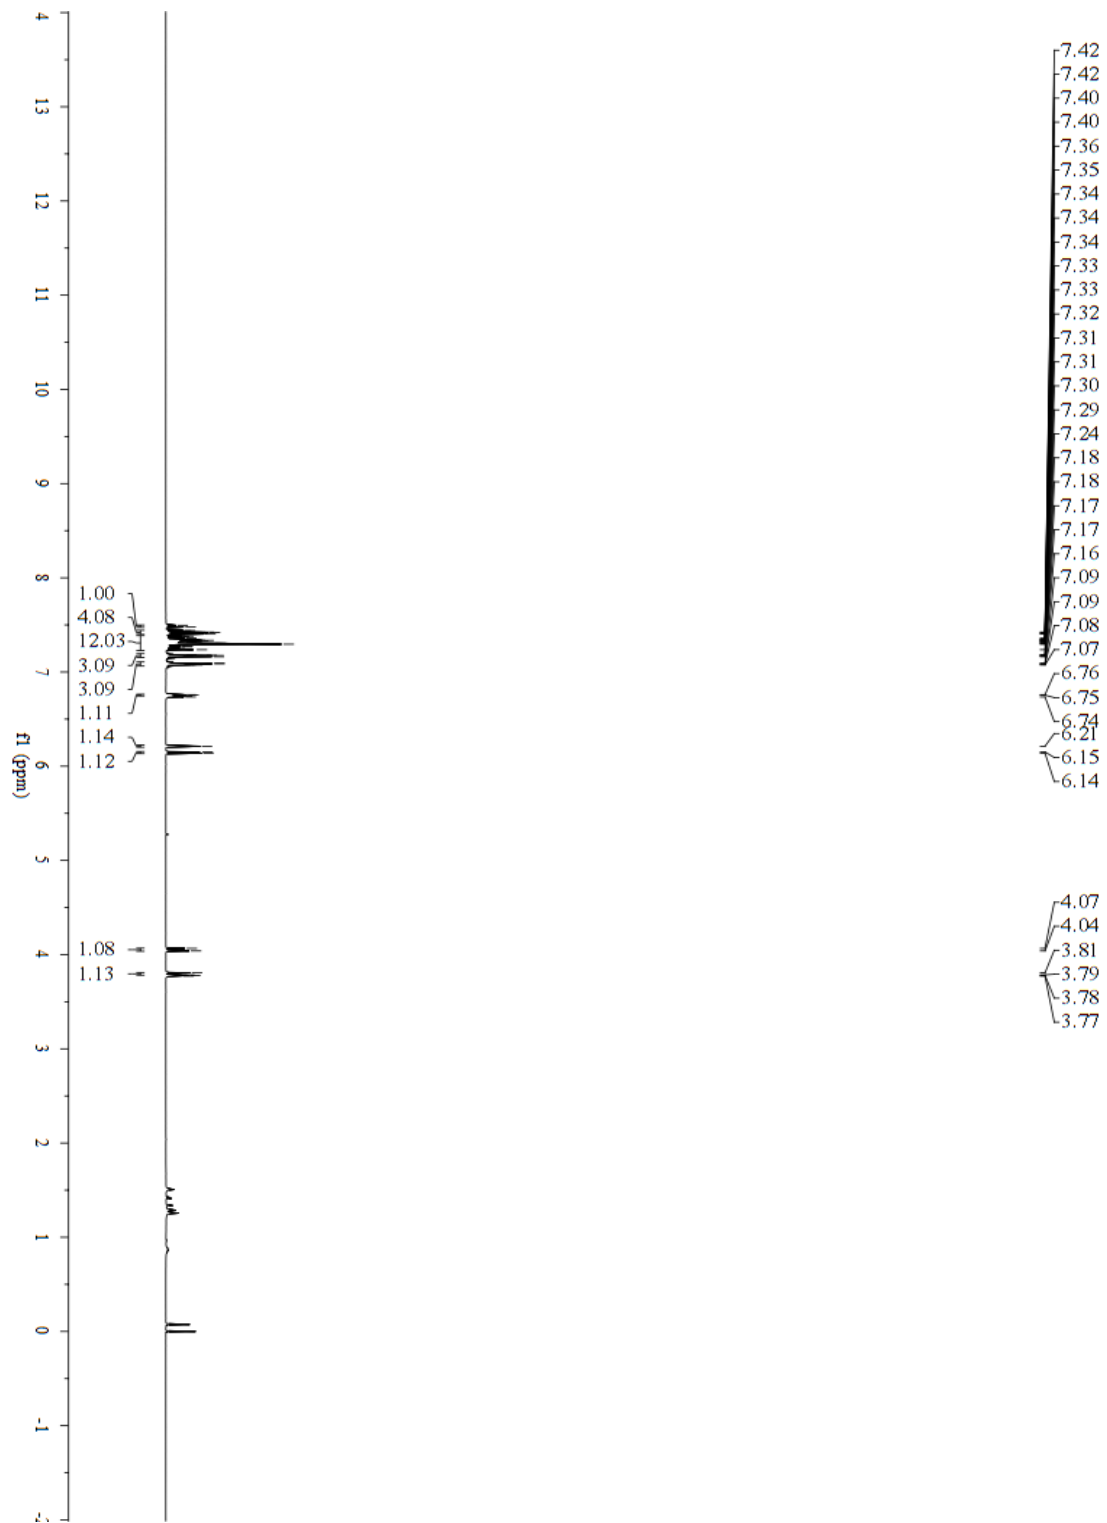

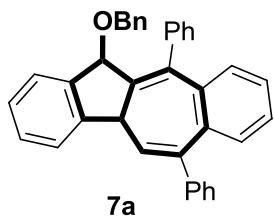

<sup>13</sup>C NMR (100 MHz, CDCl<sub>3</sub>)

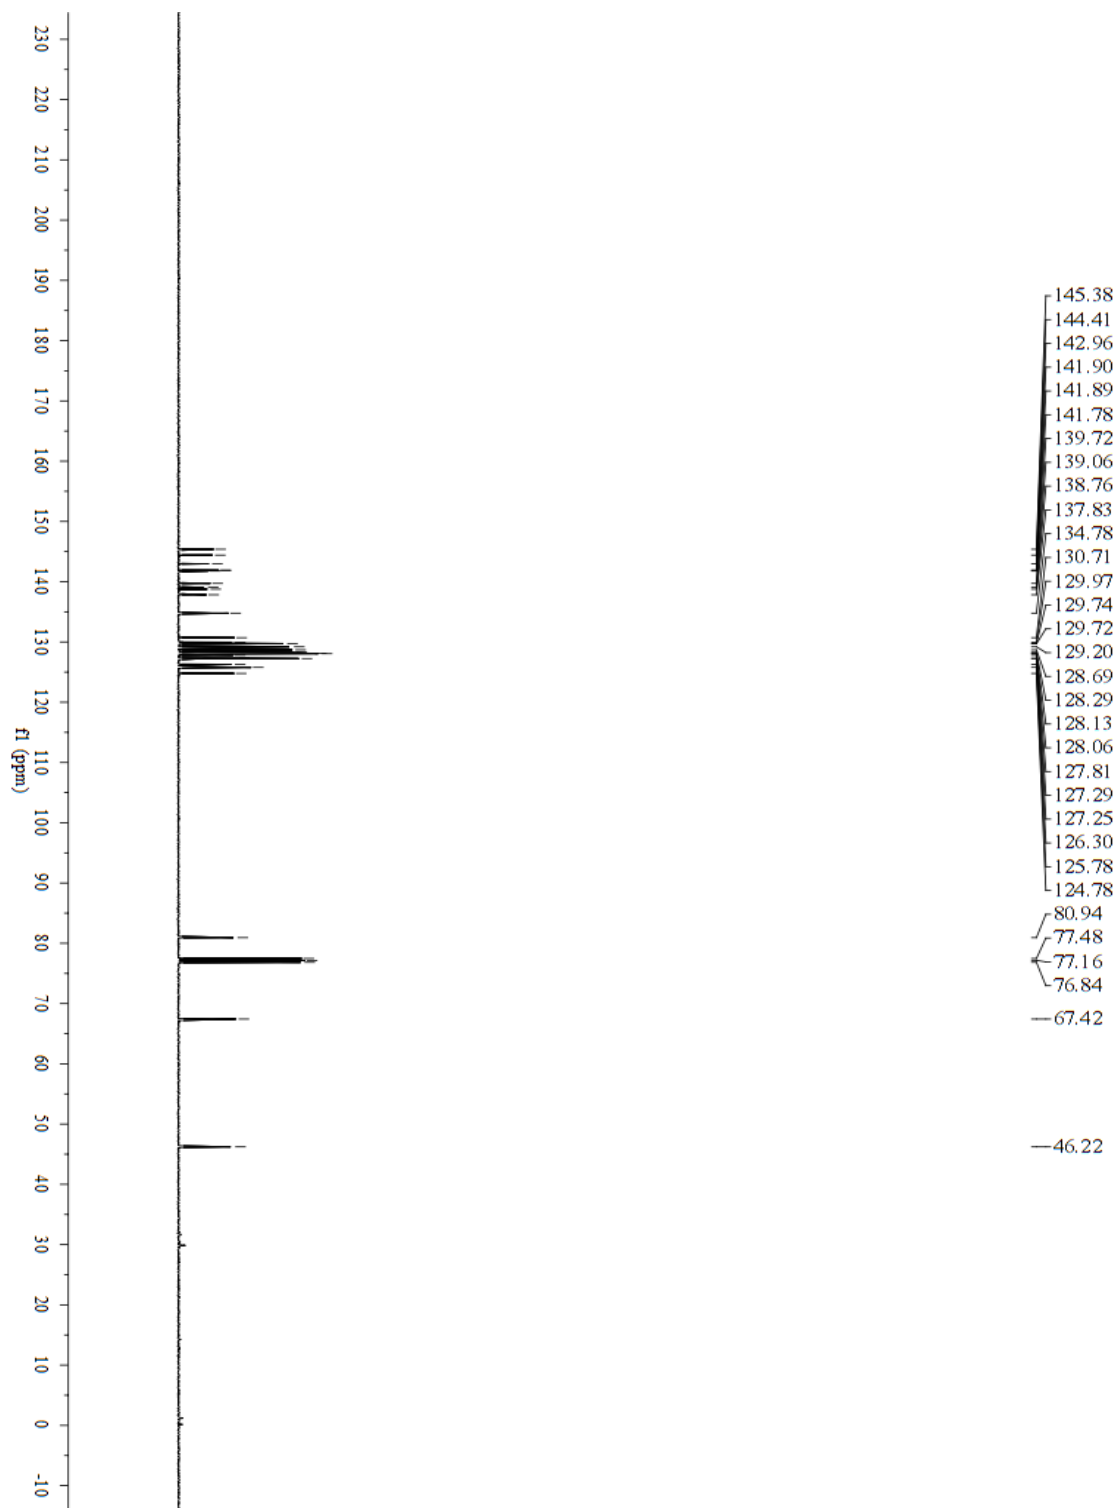

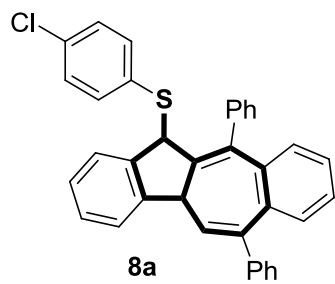

$^{13}\text{C}$  NMR (100 MHz,  $\text{CDCl}_3$ )

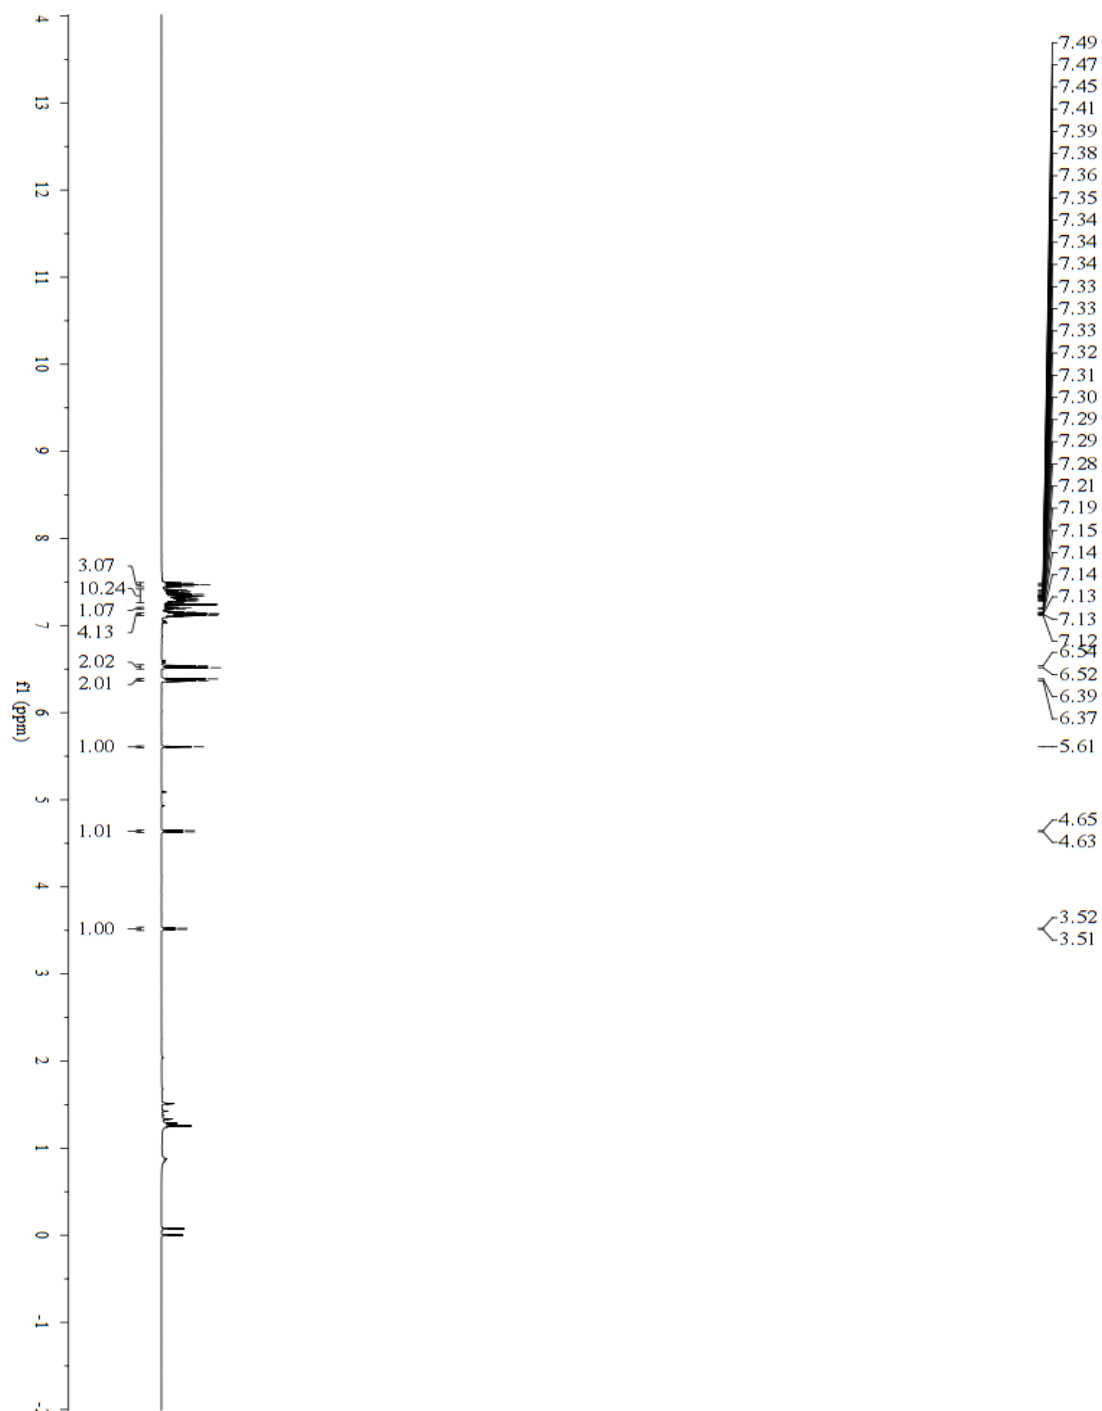

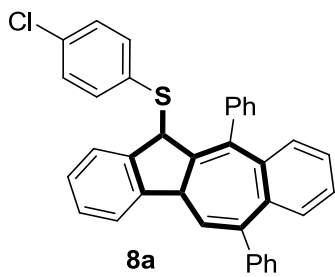

$^1\text{H NMR}$  (400 MHz,  $\text{CDCl}_3$ )

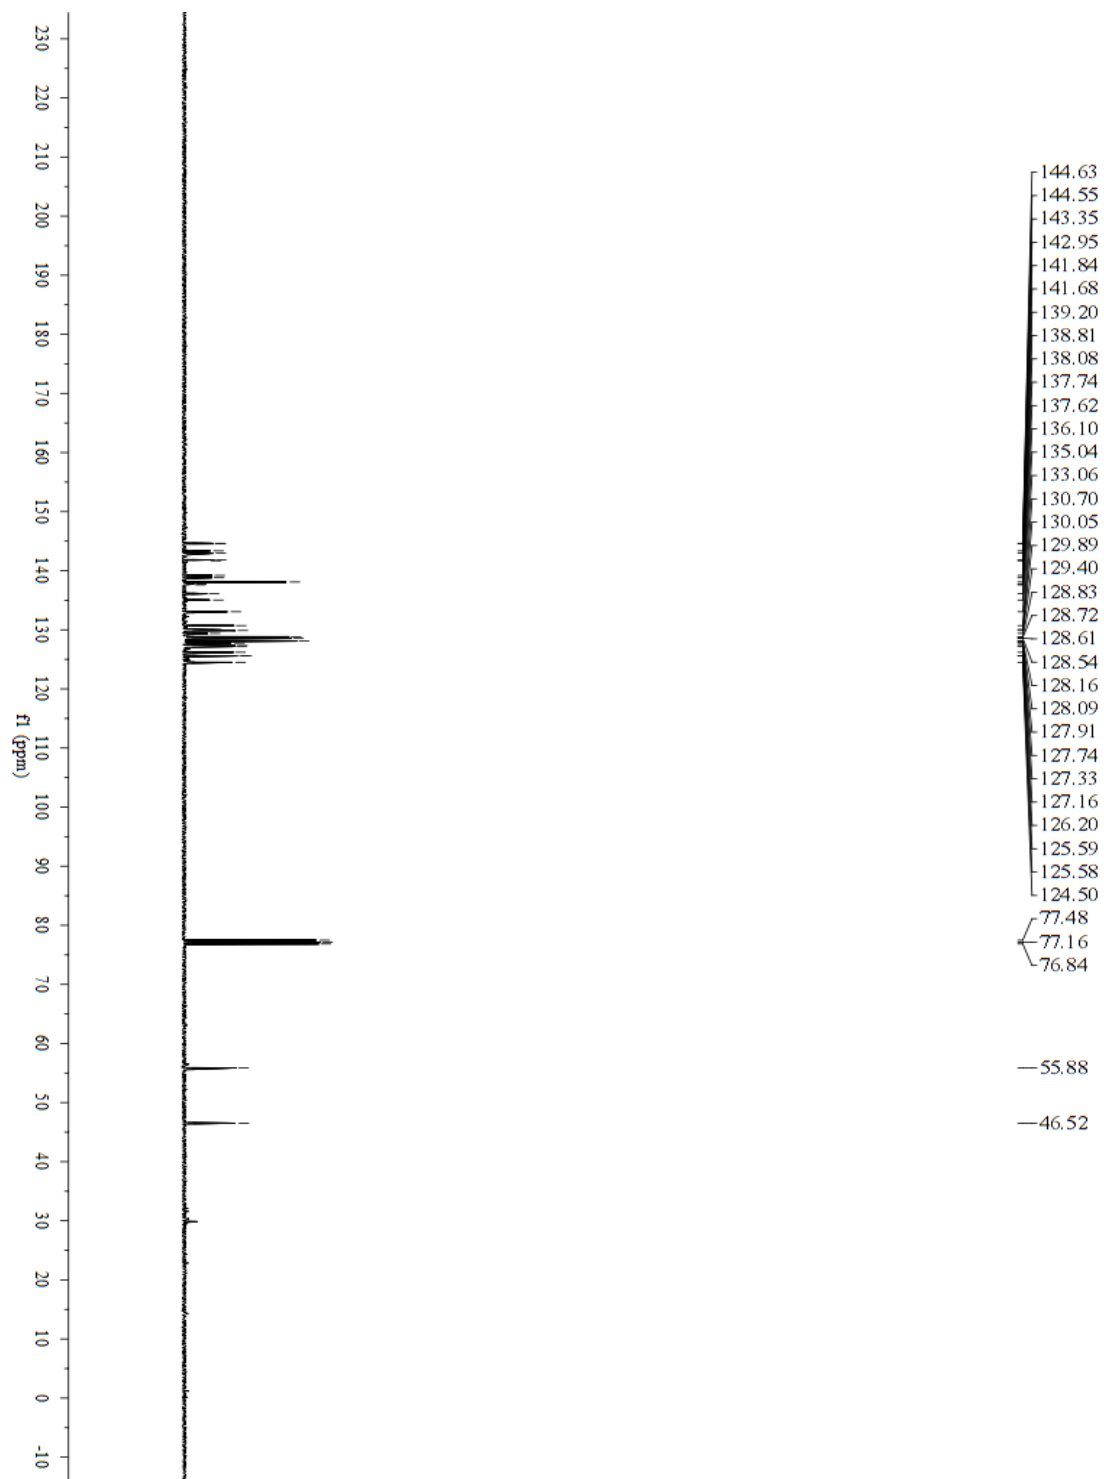



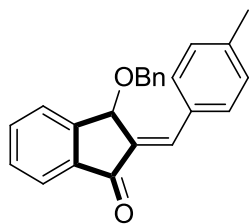

**9a**

$^1\text{H NMR}$  (400 MHz,  $\text{CDCl}_3$ )

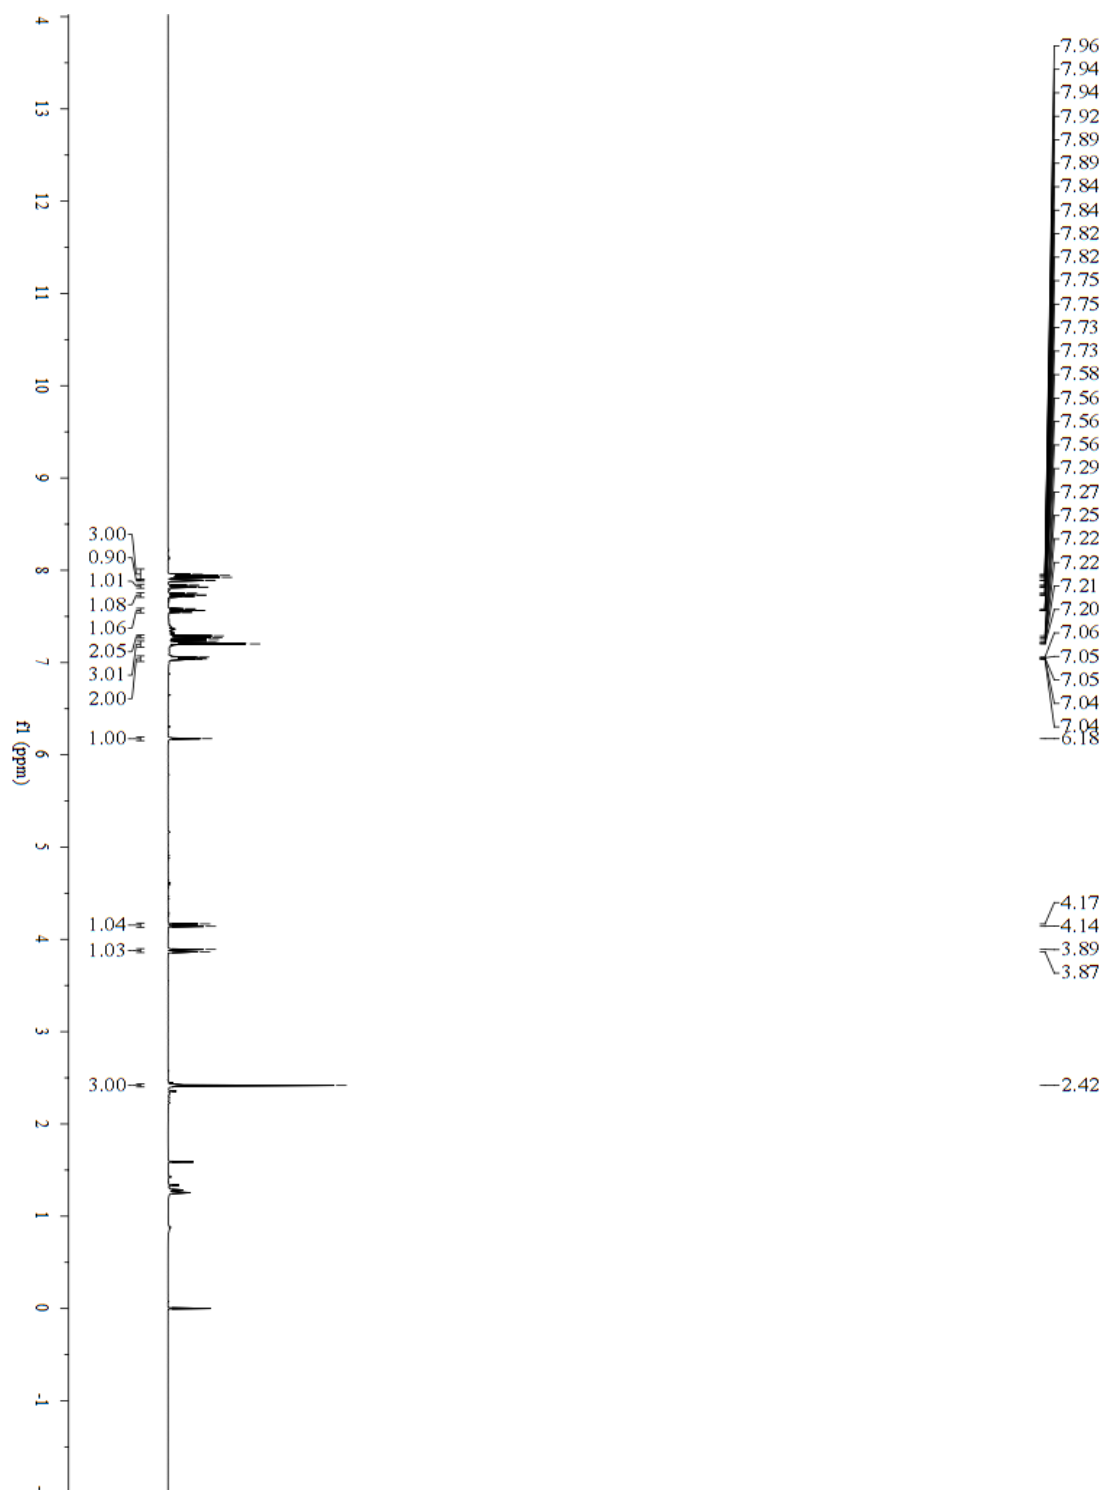

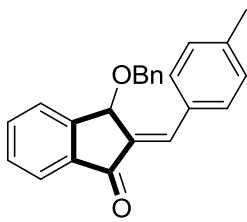

9a

$^{13}\text{C}$  NMR (100 MHz,  $\text{CDCl}_3$ )

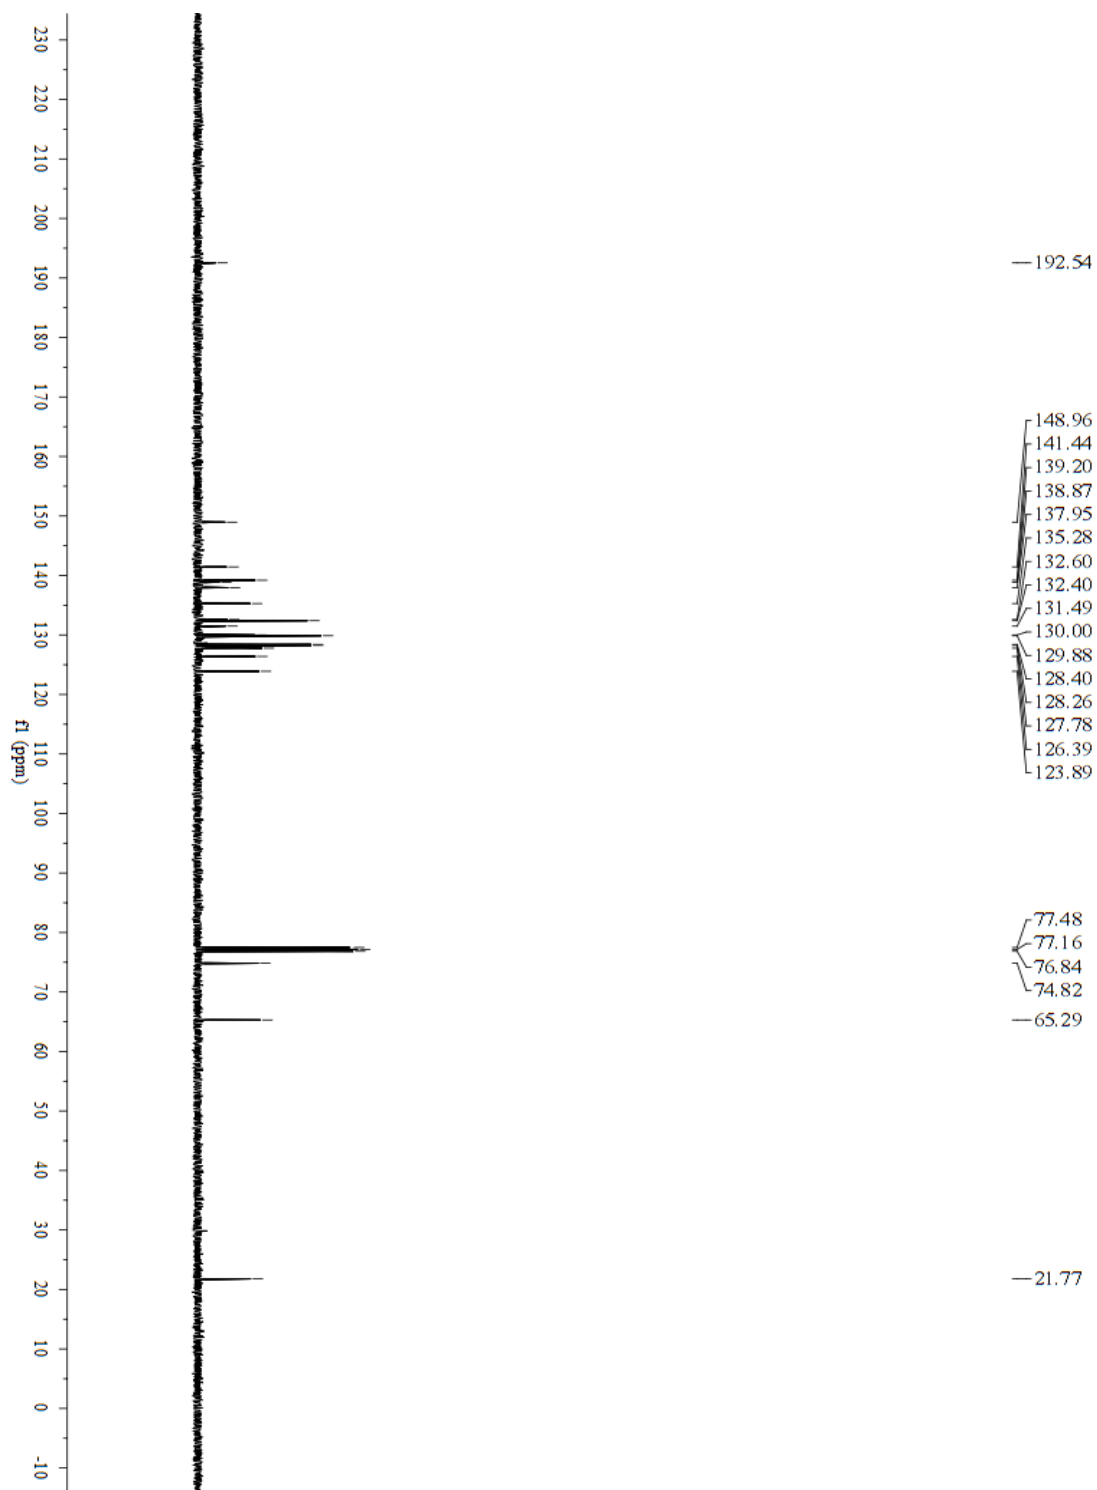

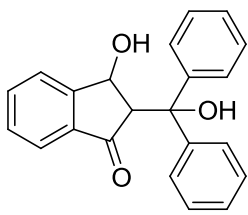

**Int-2**

**<sup>1</sup>H NMR (400 MHz, CDCl<sub>3</sub>)**

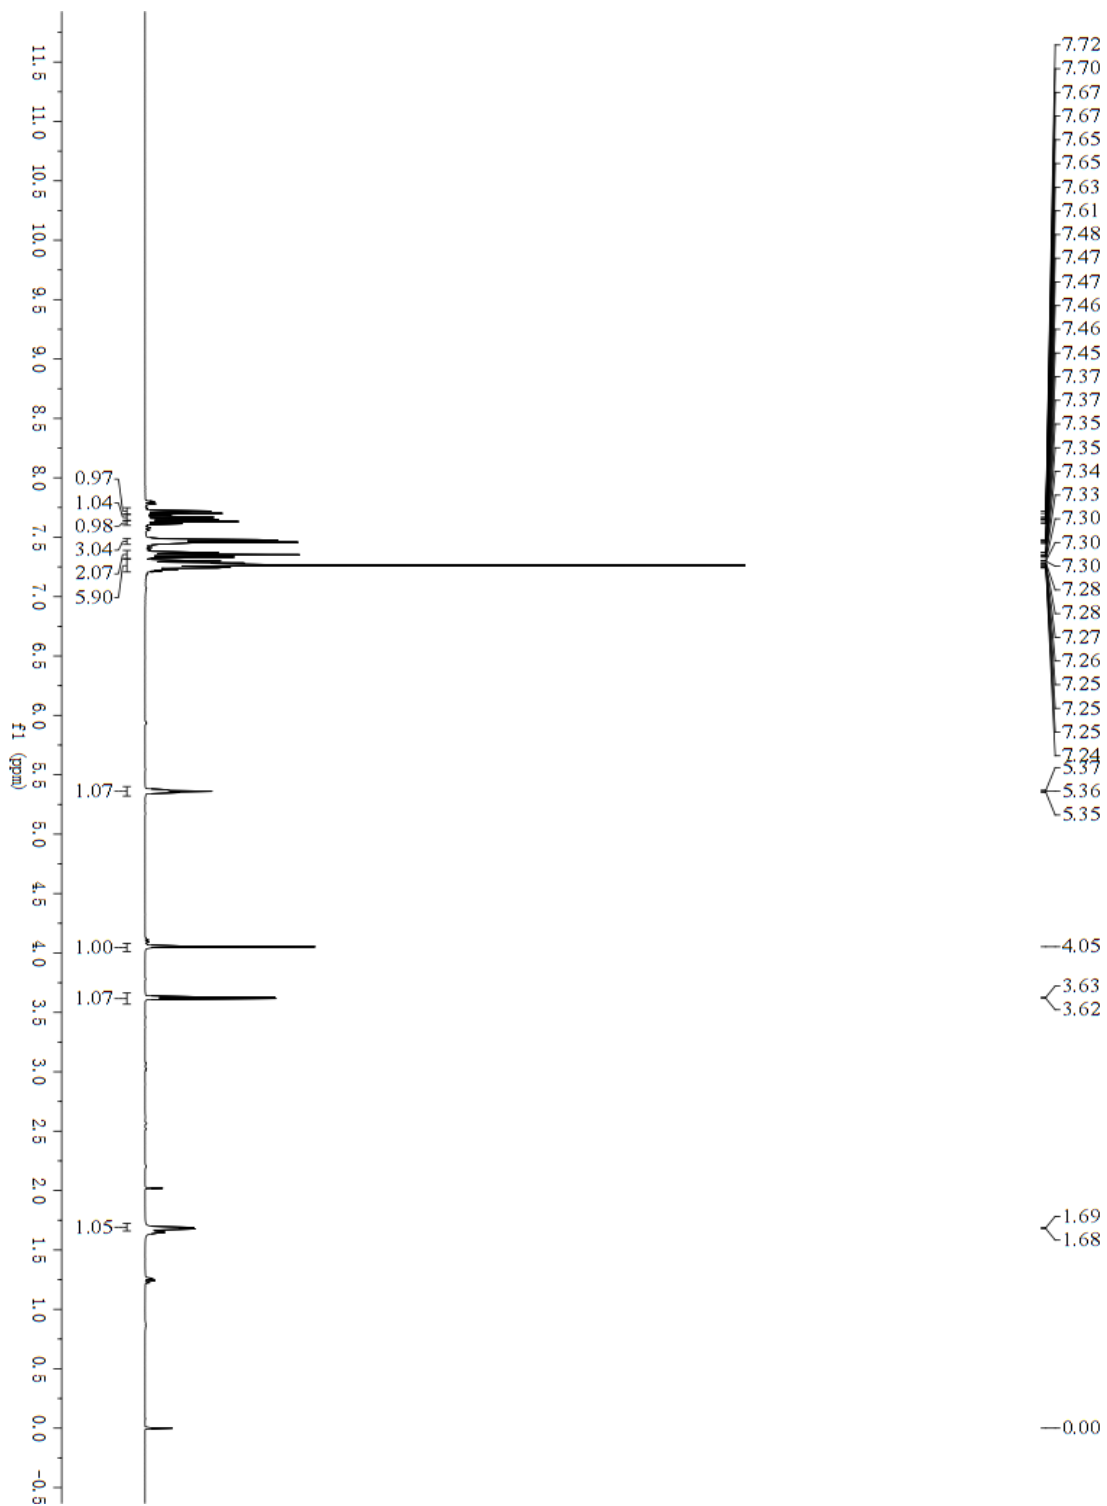

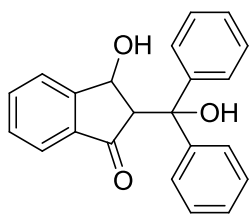

Int-2

$^{13}\text{C}$  NMR (100 MHz,  $\text{CDCl}_3$ )

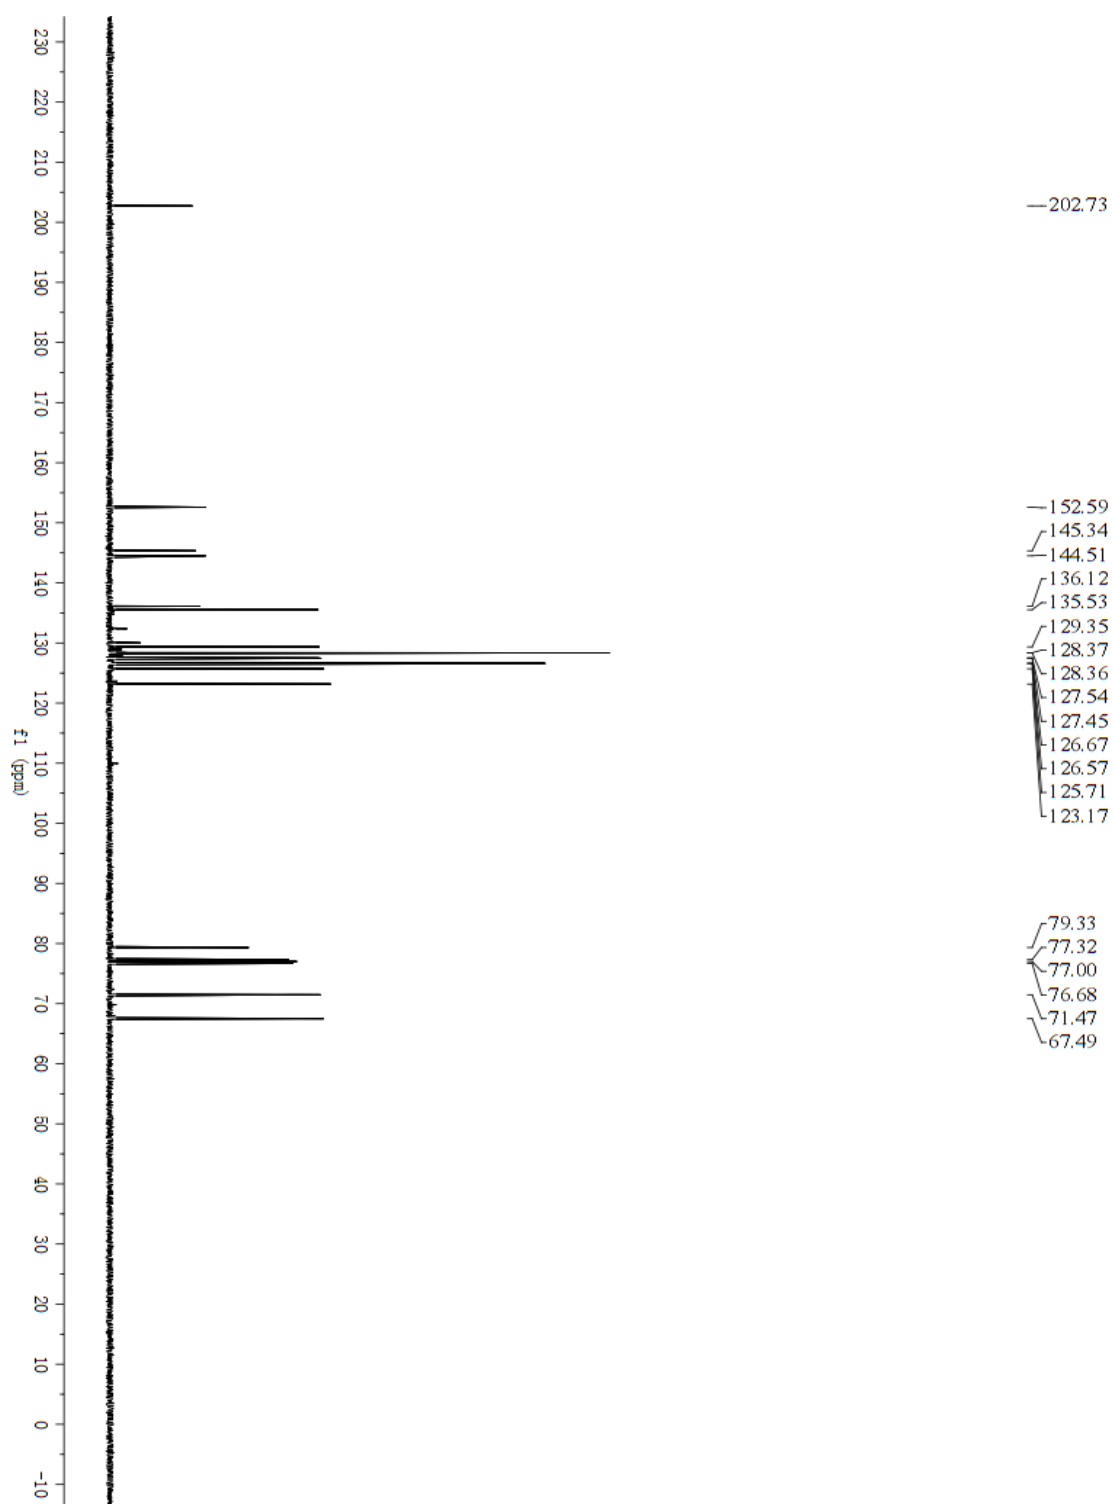

# Int-2-DEPT

DEPT\_01

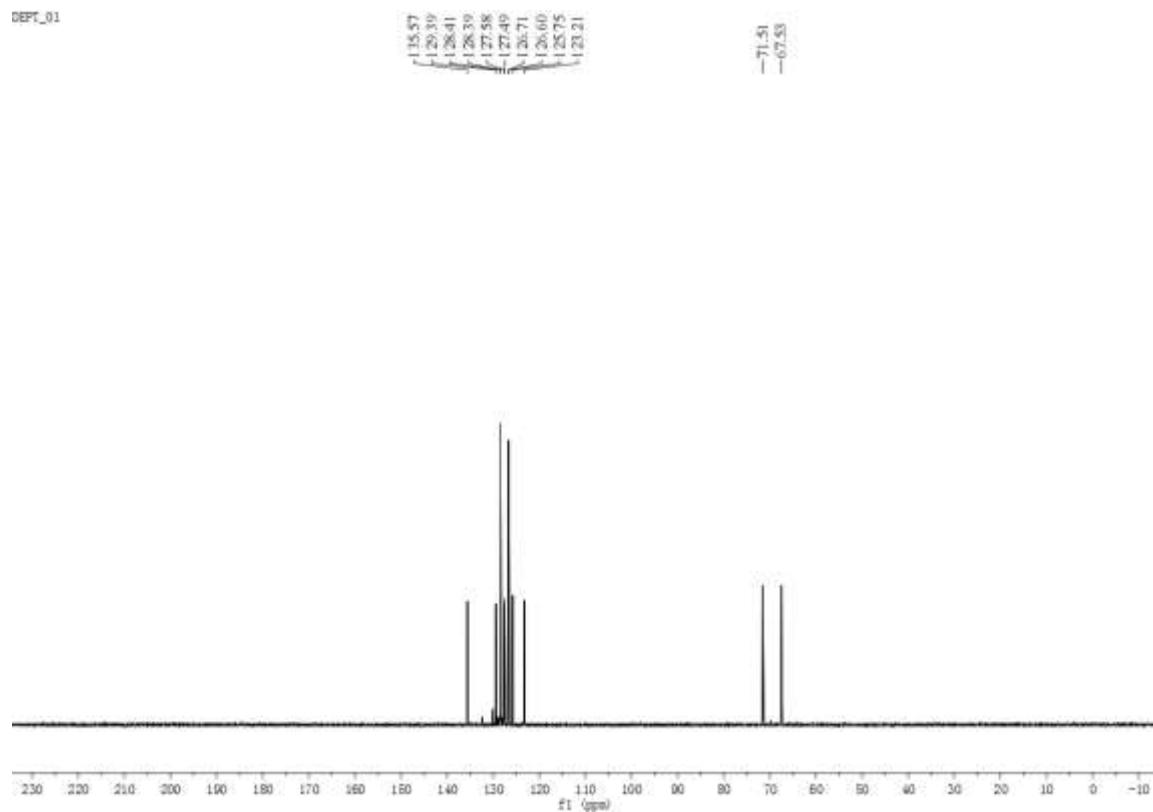

# Int-2- <sup>1</sup>H-<sup>1</sup>H COSY

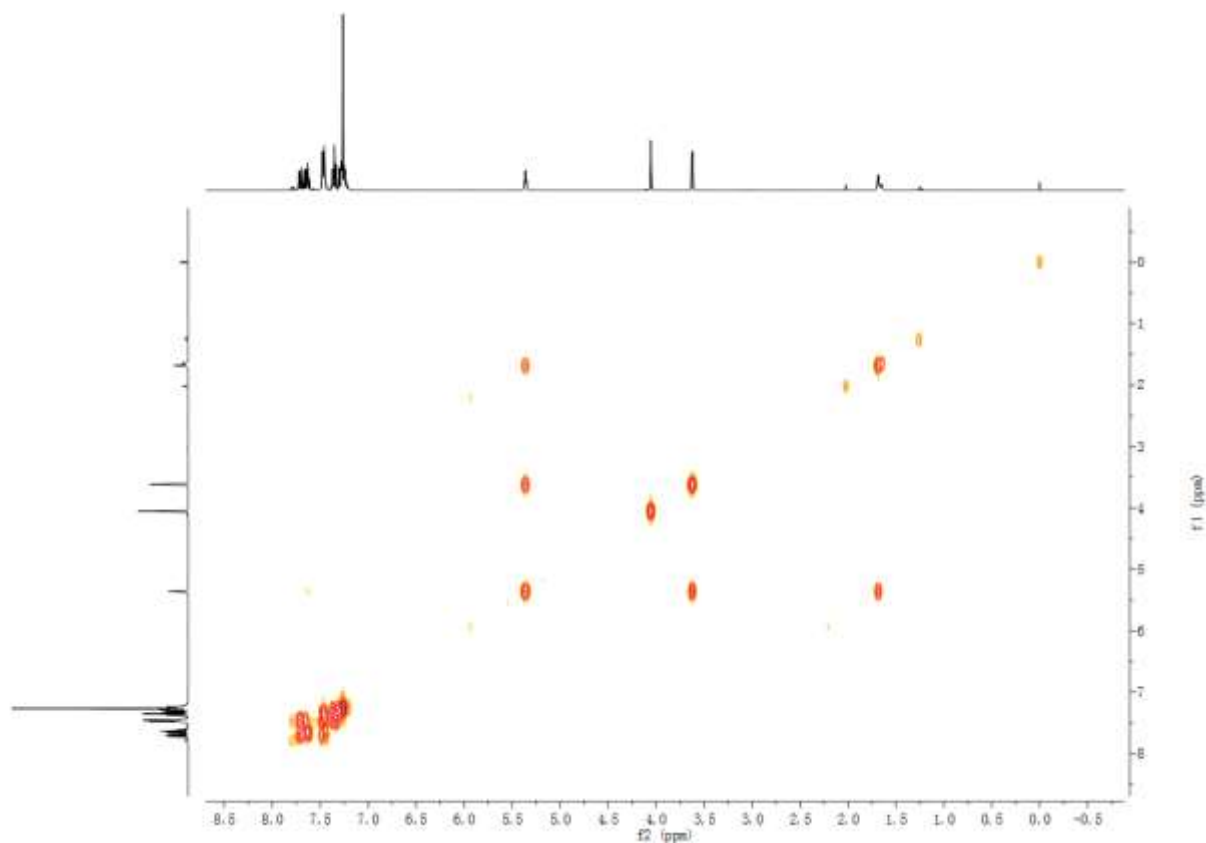

Int-2- HMBC

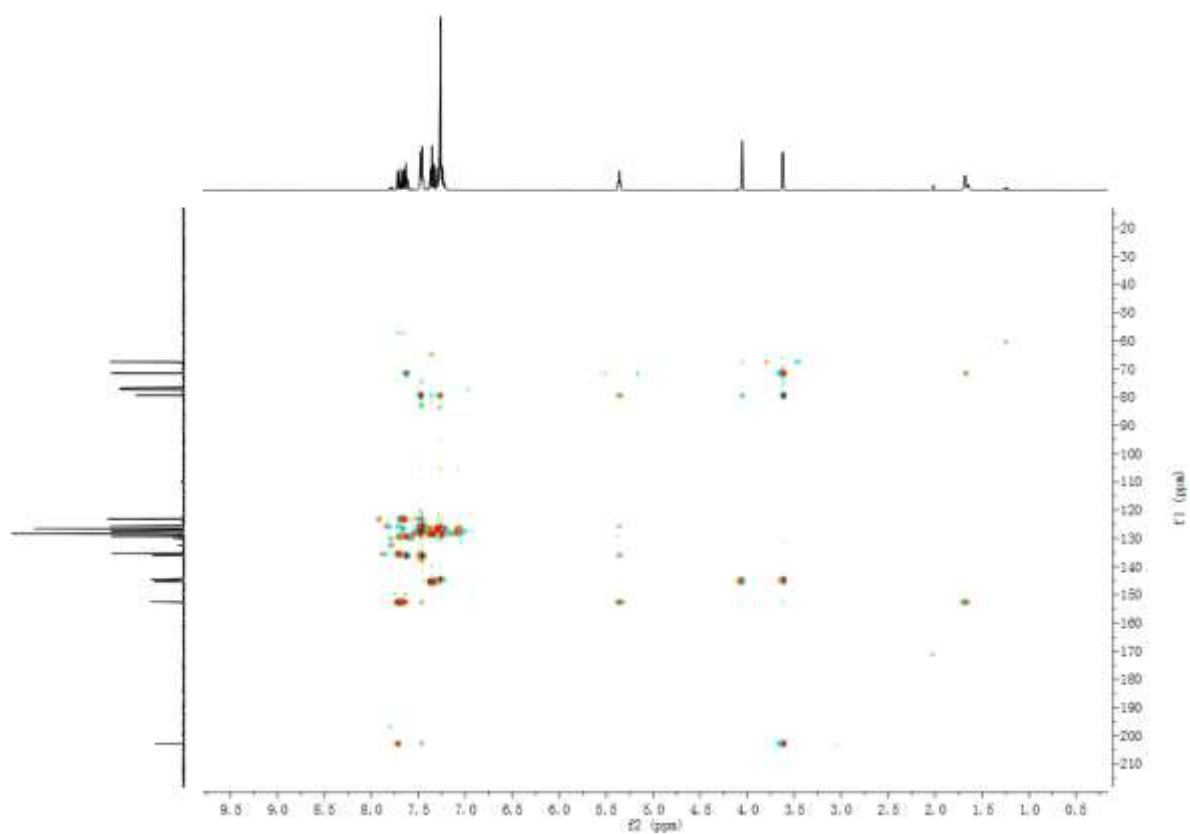

Int-2- HSQC

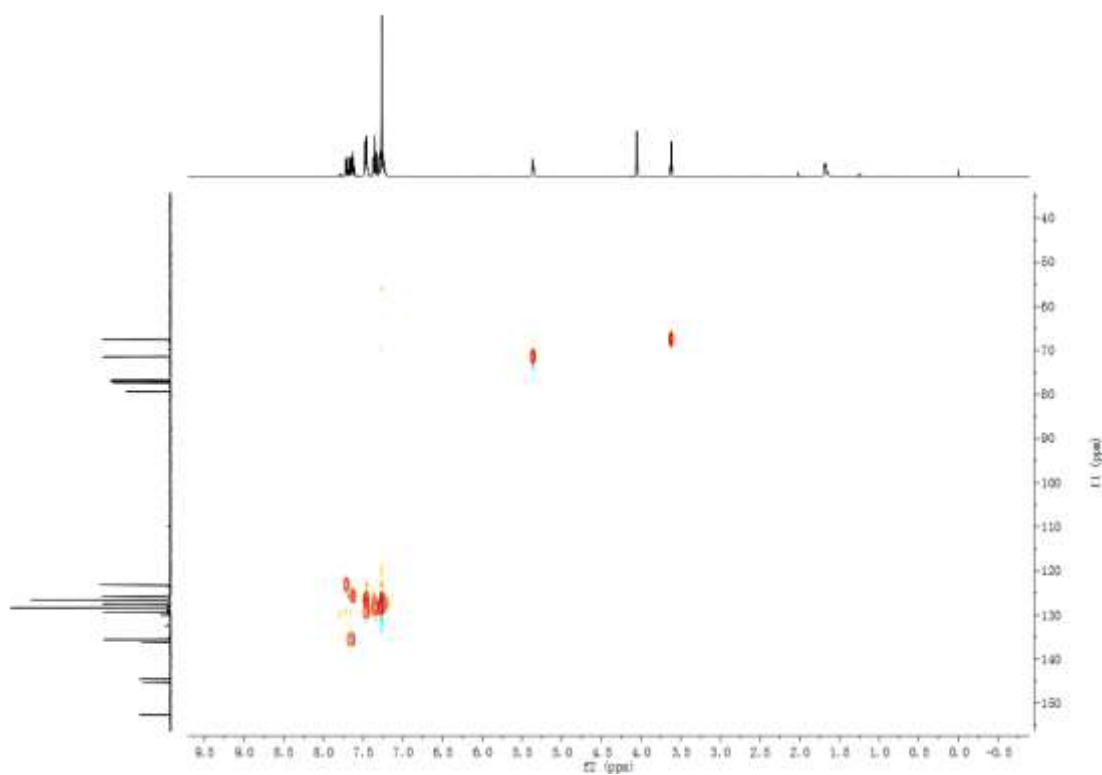

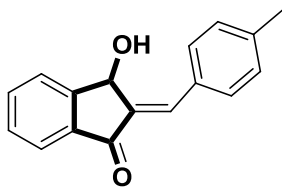

Int-3

<sup>1</sup>H NMR (400 MHz, CDCl<sub>3</sub>)

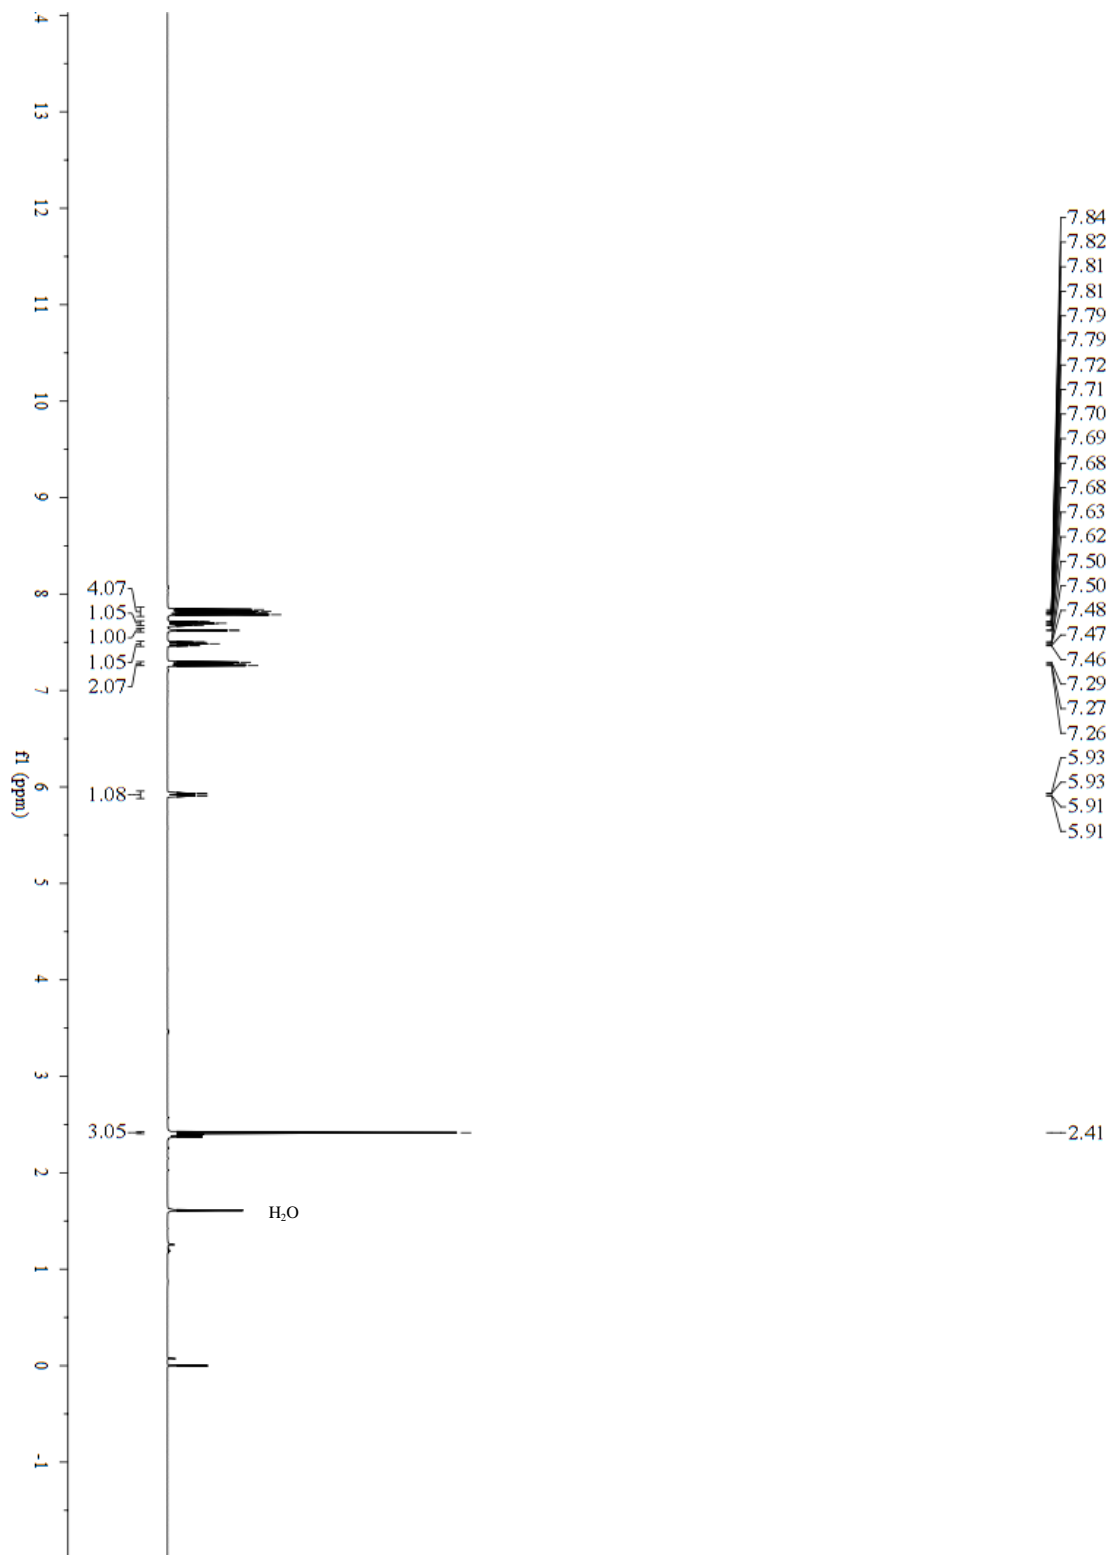

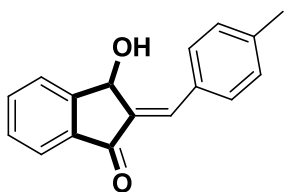

Int-3

$^{13}\text{C}$  NMR (100 MHz,  $\text{CDCl}_3$ )

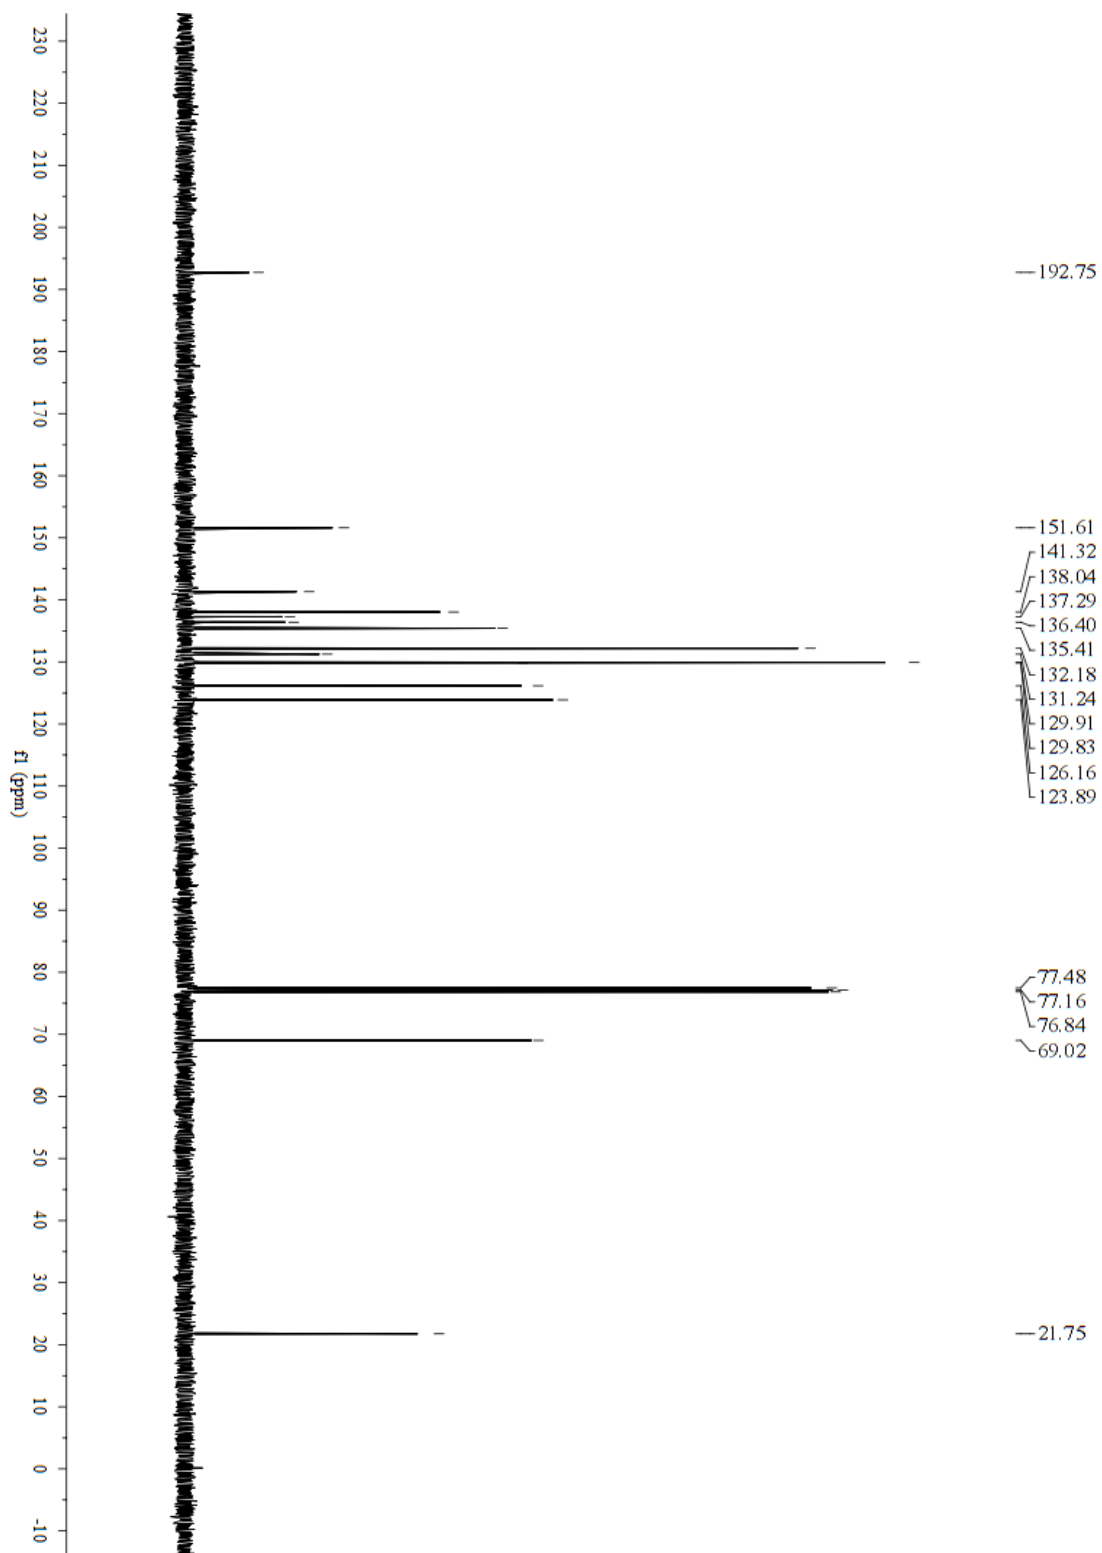



+TOF MS: 0.0791 min from Sample 1 (TuneSampleID) of P-Y-2-1.wiff  
a=5.73261327690843470e-004, t0=3.39272797853219110e+000 (DuoSpray ())

Max. 3.1e4 cps.

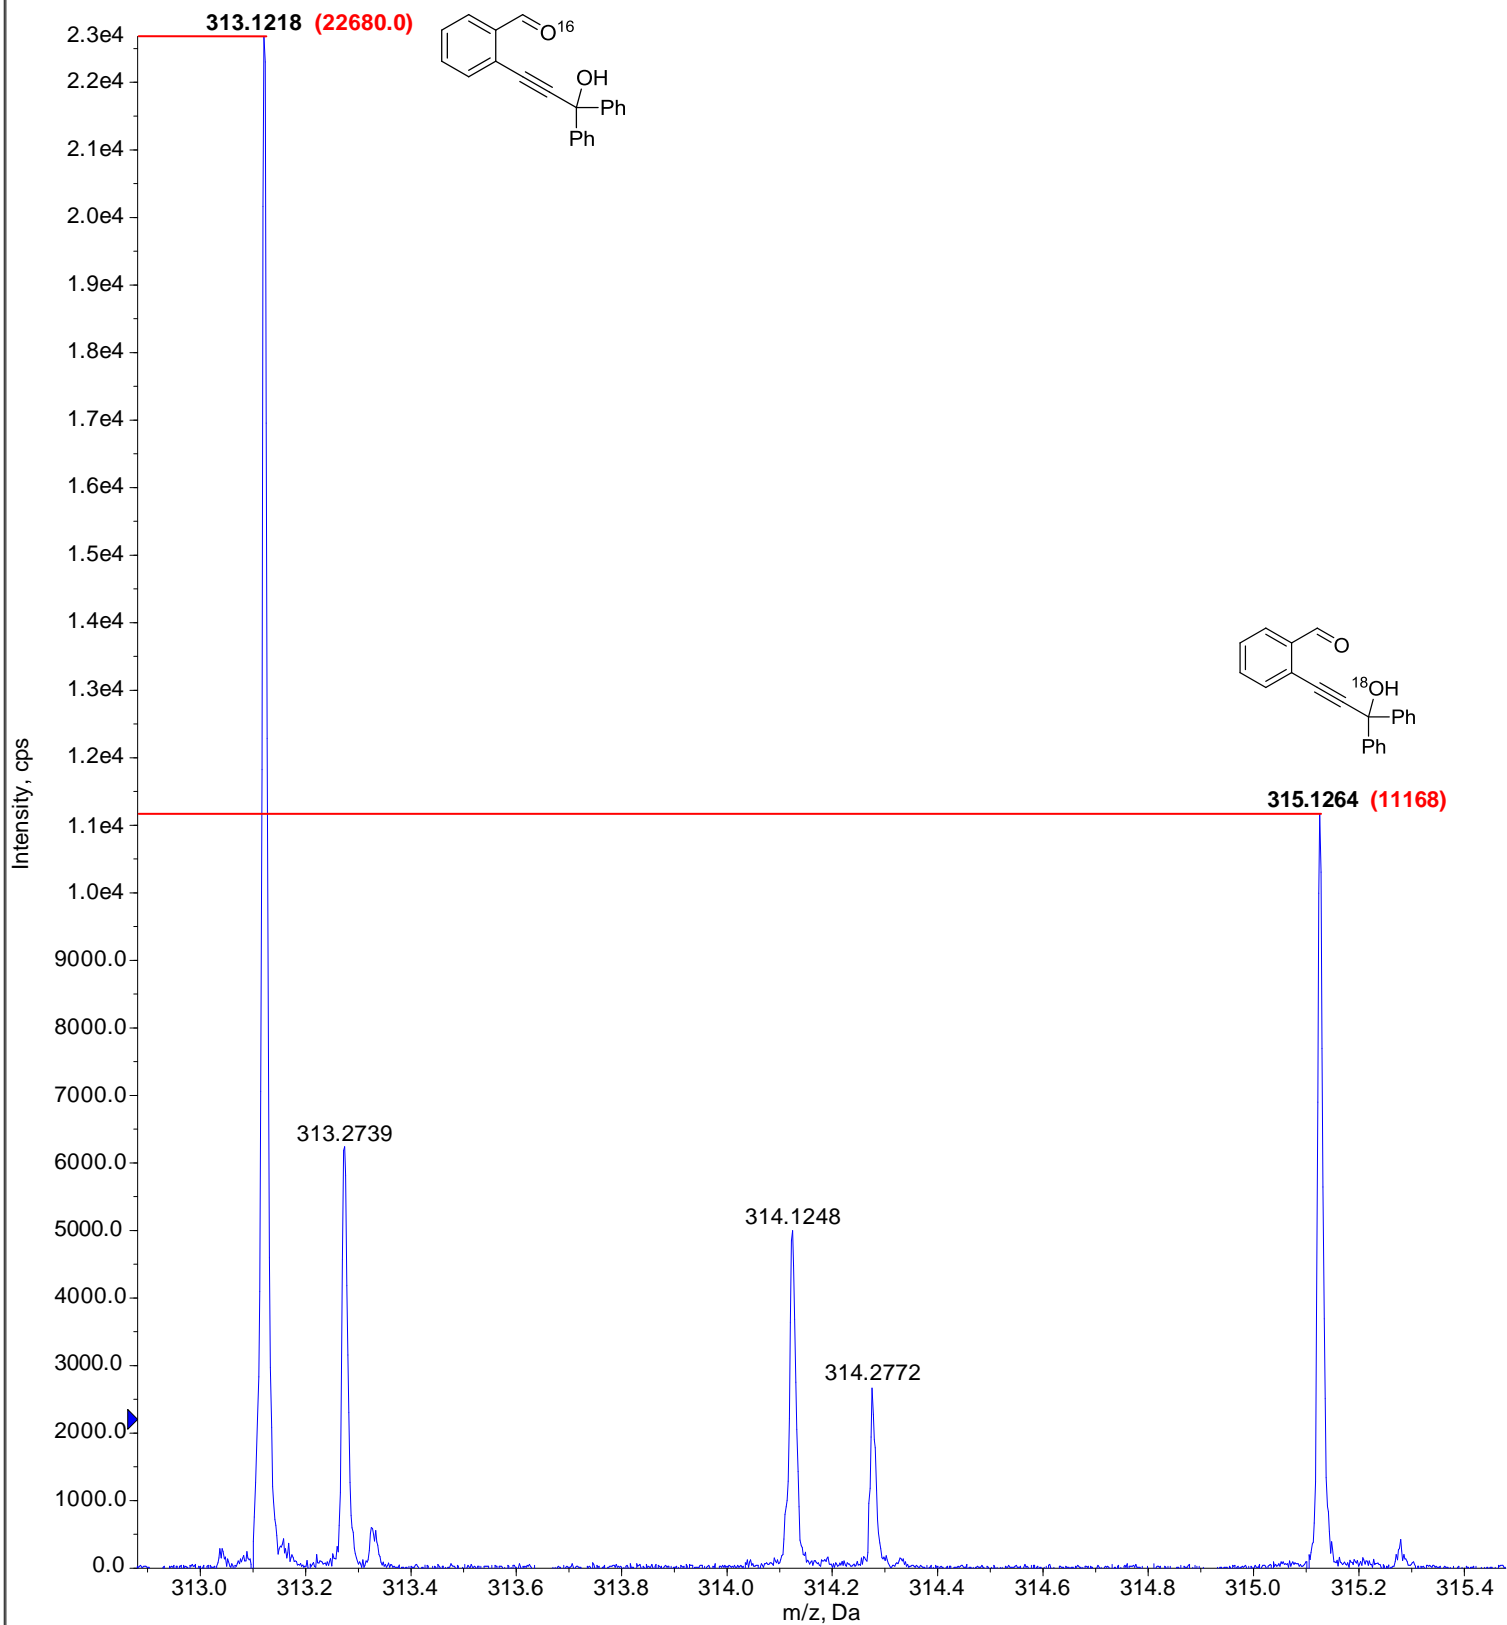

$1a-^{16}O : 1a-^{18}O \approx 2 : 1$

Model reaction:

+TOF MS: 0.2185 min from Sample 1 (TuneSampleID) of P-C2-1.wiff  
a=5.73261327690843470e-004, t0=3.39272797853219110e+000 (DuoSpray())

Max. 9.7e4 cps.

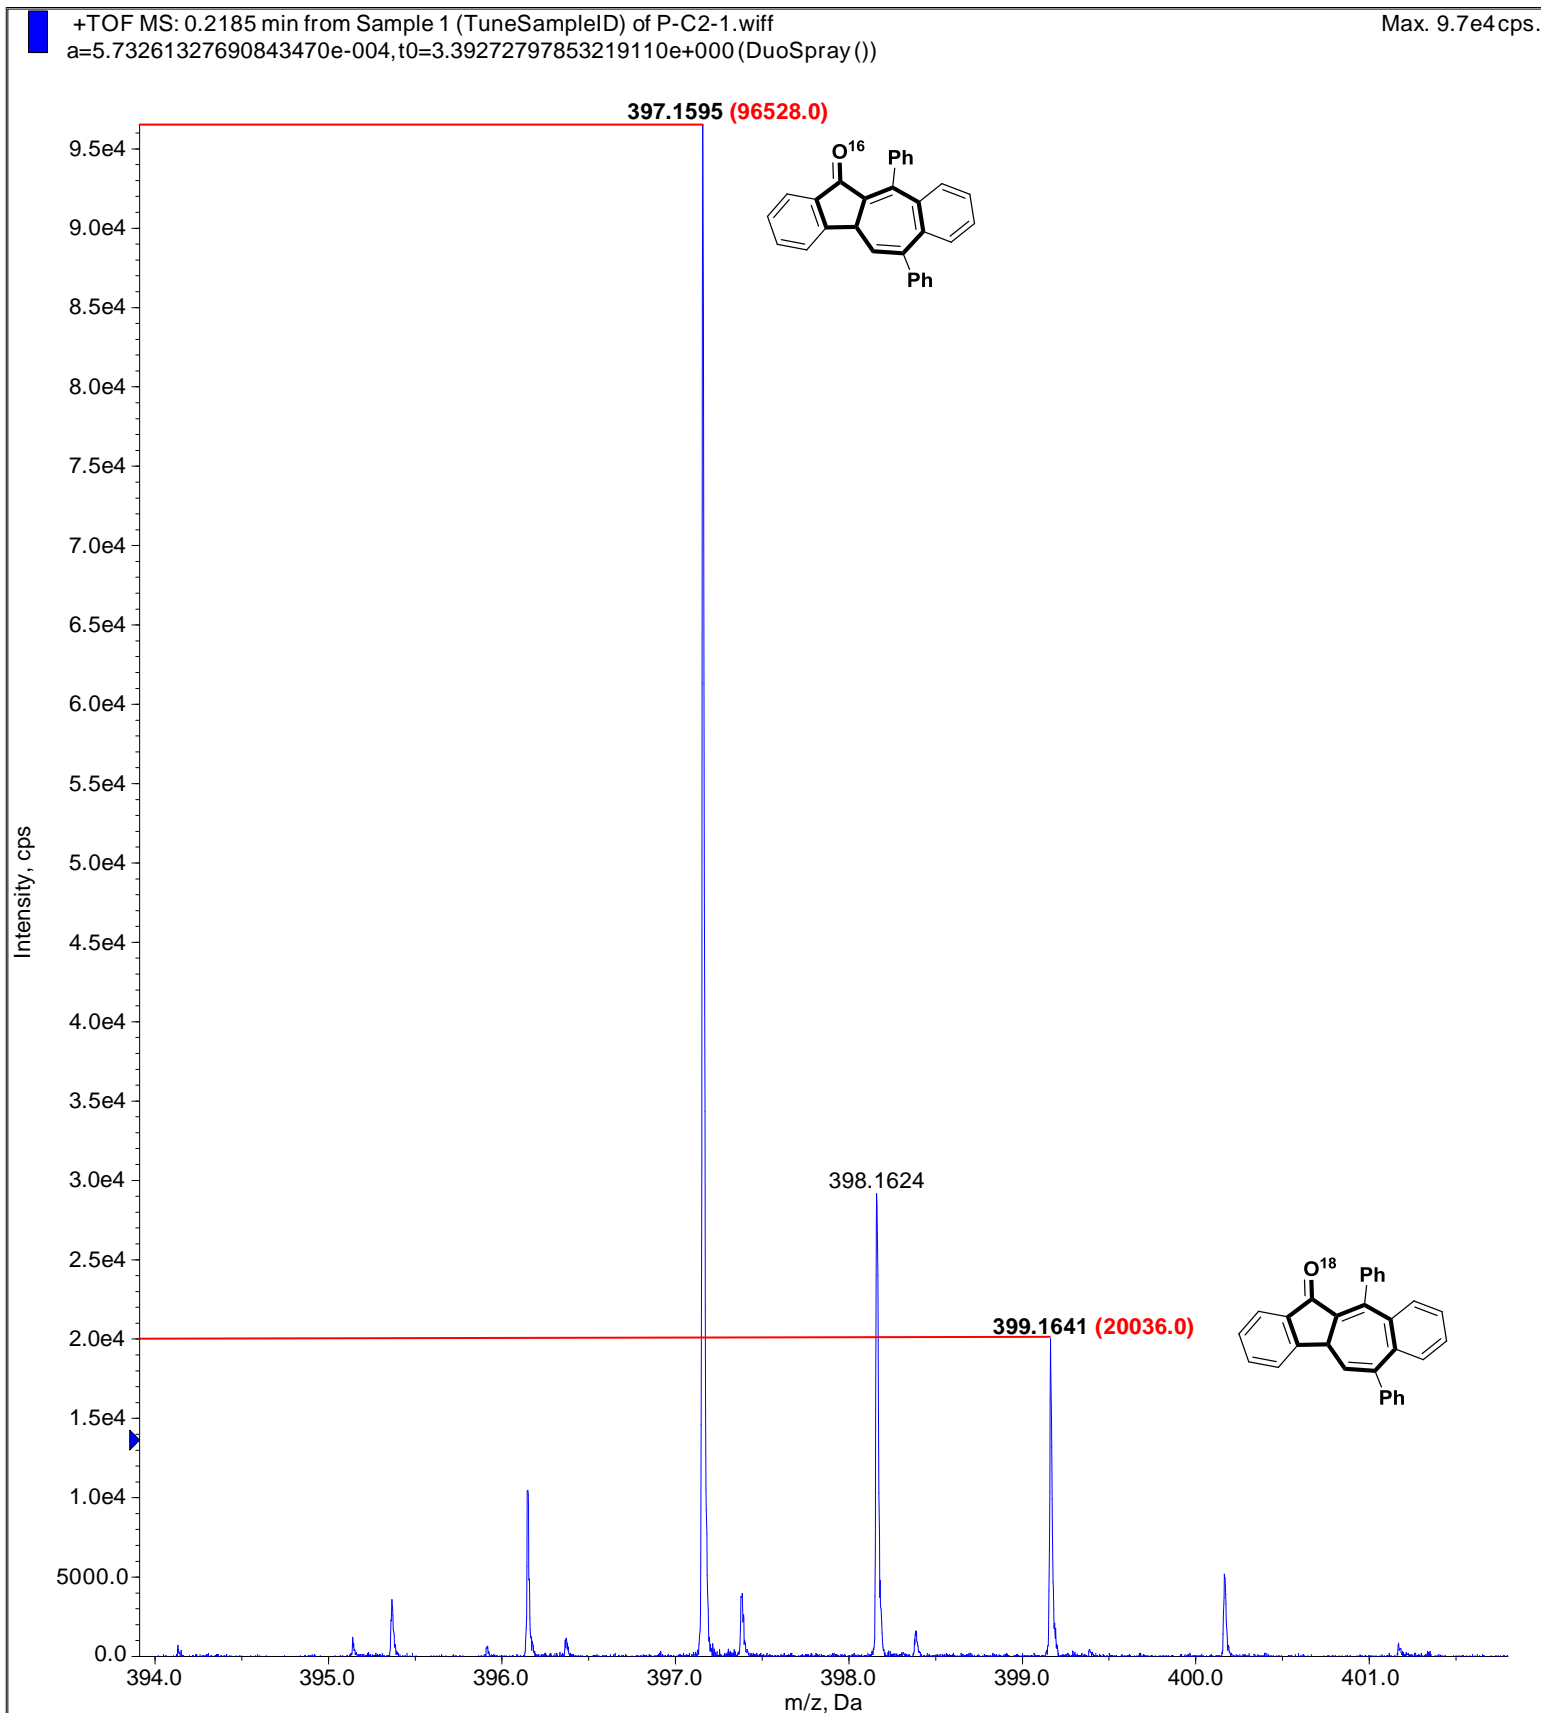

$3a\text{-}^{16}\text{O} : 3a\text{-}^{18}\text{O} \approx 5 : 1$

# H<sub>2</sub>O<sup>18</sup> Experiment:

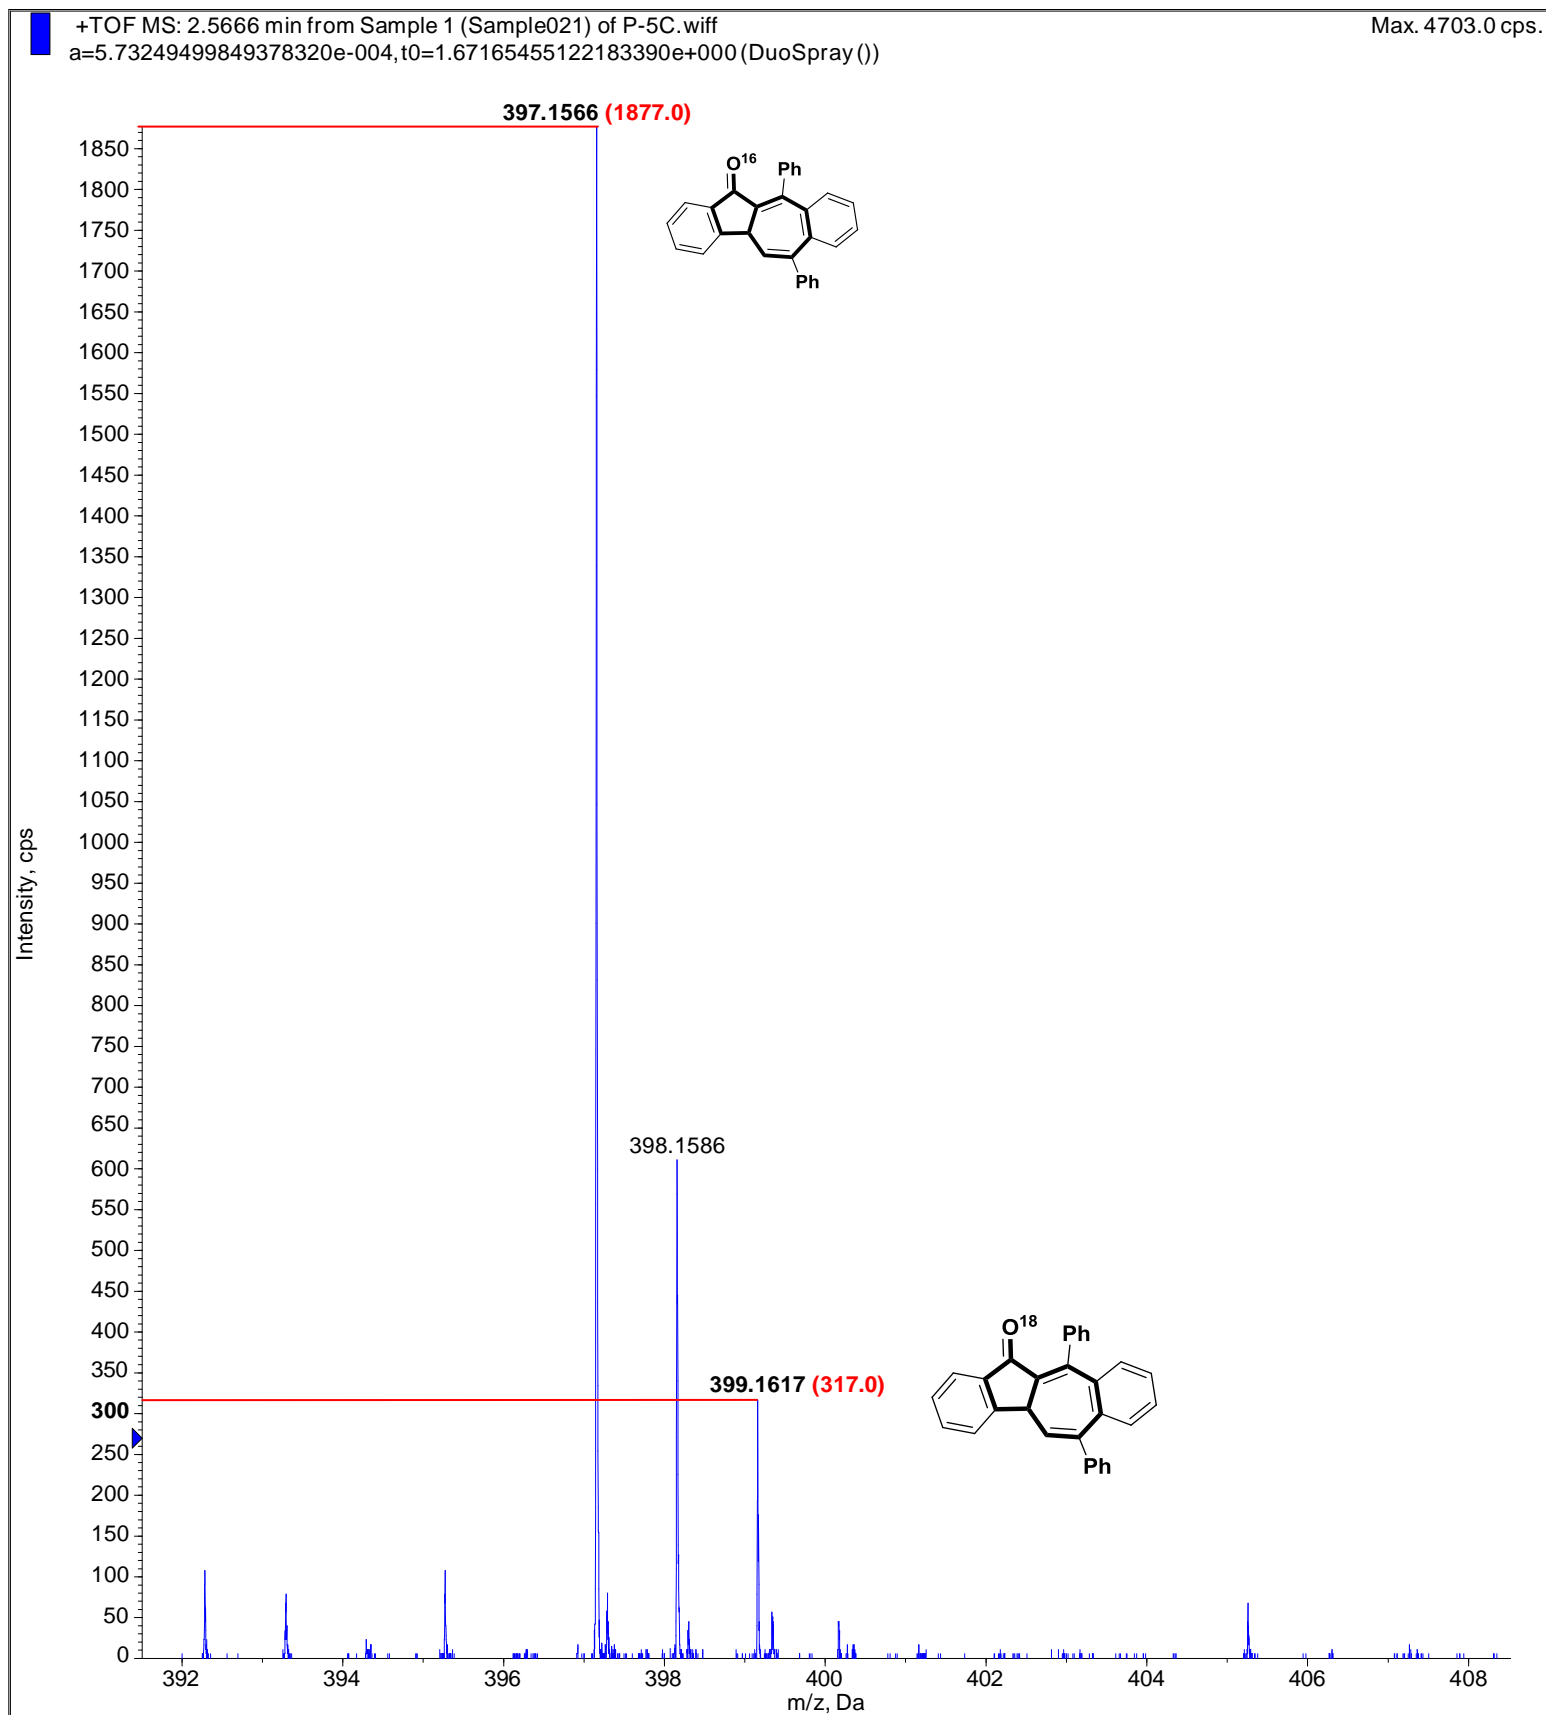

$3a\text{-}^{16}\text{O} : 3a\text{-}^{18}\text{O} \approx 6 : 1$
